# Supplementary material
Source: publisher figshare collection journal article supplement (https://gsajournals.figshare.com/ndownloader/files/27965715)
Supplement: Supplementary file 1 [file 27965715]

## Sheet: Summary
Table S3. ISCompare evaluation using 3,000 random IS30 insertions.
IS database	TP	TP*	FP	FP*	FN	FN*	Total Positives	Sensitivity	Sensitivity *	Precision	Precision*	F1	F(0,5)	F(2)	VD	VD (Not found or discarded ignored)
IS finder	2819	2973	0	232	181	27	3000	0.939667	0.991	1	0.927613	0.968895	0.987321	0.977639	386	295
is30	2809	2971	0	55	191	29	3000	0.936333	0.990333	1	0.981824	0.96712	0.986583	0.98862	217	217
												b	0.5	2
IS finder (Not found or discarded omitted)	2819	2973	0	141	181	27	3000	0.939667	0.991	1	0.954721	0.968895	0.987321	0.983525
F1 = 2* (Precision*Recall)/(Precision+Recall)
Fb = (1+b^2)* (Precision*Recall)/(b^2*Precision+Recall)
VD per 100 IS	% FP on VM	% FP on VD (Not found or discarded ignored)
12.8667	39.8964	52.2034
7.23333	74.6544	74.6544

## Sheet: Simulated IS30 Insertions set 1
ID	Sim_I	location
1	sim1	28586
2	sim1	46521
3	sim1	136654
4	sim1	185377
5	sim1	221159
6	sim1	232603
7	sim1	232631
8	sim1	233738
9	sim1	281993
10	sim1	319554
11	sim1	339984
12	sim1	411873
13	sim1	481930
14	sim1	533477
15	sim1	628217
16	sim1	694405
17	sim1	702884
18	sim1	740643
19	sim1	763460
20	sim1	1073554
21	sim1	1109372
22	sim1	1162082
23	sim1	1201747
24	sim1	1211618
25	sim1	1262519
26	sim1	1379184
27	sim1	1422406
28	sim1	1442225
29	sim1	1460624
30	sim1	1466866
31	sim1	1479386
32	sim1	1604894
33	sim1	1617060
34	sim1	1626616
35	sim1	1648070
36	sim1	1658419
37	sim1	1754446
38	sim1	1754547
39	sim1	1780648
40	sim1	1798464
41	sim1	1853479
42	sim1	1890504
43	sim1	1934972
44	sim1	1943605
45	sim1	2023507
46	sim1	2075131
47	sim1	2104936
48	sim1	2167656
49	sim1	2178611
50	sim1	2231150
51	sim1	2254416
52	sim1	2258792
53	sim1	2323694
54	sim1	2410789
55	sim1	2444143
56	sim1	2449745
57	sim1	2565675
58	sim1	2742000
59	sim1	2854403
60	sim1	2875762
61	sim1	2893718
62	sim1	2944650
63	sim1	3007937
64	sim1	3069413
65	sim1	3245999
66	sim1	3260495
67	sim1	3275950
68	sim1	3297068
69	sim1	3344596
70	sim1	3353954
71	sim1	3356035
72	sim1	3425882
73	sim1	3519281
74	sim1	3541370
75	sim1	3593161
76	sim1	3679224
77	sim1	3739873
78	sim1	3770628
79	sim1	3776936
80	sim1	3778491
81	sim1	3787479
82	sim1	3788811
83	sim1	3901471
84	sim1	4003056
85	sim1	4014898
86	sim1	4028167
87	sim1	4030219
88	sim1	4049820
89	sim1	4059037
90	sim1	4065997
91	sim1	4096784
92	sim1	4158679
93	sim1	4189125
94	sim1	4196931
95	sim1	4278846
96	sim1	4288542
97	sim1	4302160
98	sim1	4464175
99	sim1	4542458
100	sim1	4632977
101	sim2	24841
102	sim2	44068
103	sim2	132117
104	sim2	307869
105	sim2	332708
106	sim2	356245
107	sim2	398655
108	sim2	409563
109	sim2	437142
110	sim2	597599
111	sim2	608814
112	sim2	616630
113	sim2	627397
114	sim2	635772
115	sim2	687577
116	sim2	808855
117	sim2	835866
118	sim2	862047
119	sim2	869092
120	sim2	1029574
121	sim2	1083997
122	sim2	1091862
123	sim2	1119315
124	sim2	1122081
125	sim2	1249180
126	sim2	1289364
127	sim2	1308127
128	sim2	1445491
129	sim2	1455930
130	sim2	1540716
131	sim2	1596010
132	sim2	1606200
133	sim2	1608116
134	sim2	1648241
135	sim2	1675098
136	sim2	1693219
137	sim2	1700034
138	sim2	1713308
139	sim2	1745003
140	sim2	1864262
141	sim2	1890548
142	sim2	1936134
143	sim2	2052101
144	sim2	2149573
145	sim2	2185564
146	sim2	2199043
147	sim2	2284693
148	sim2	2307618
149	sim2	2376337
150	sim2	2448136
151	sim2	2459326
152	sim2	2506642
153	sim2	2507646
154	sim2	2540869
155	sim2	2651860
156	sim2	2712943
157	sim2	2720226
158	sim2	2823780
159	sim2	2902174
160	sim2	2981376
161	sim2	2997946
162	sim2	3076646
163	sim2	3132235
164	sim2	3147950
165	sim2	3243083
166	sim2	3274099
167	sim2	3307813
168	sim2	3355378
169	sim2	3456095
170	sim2	3456236
171	sim2	3470653
172	sim2	3476285
173	sim2	3485390
174	sim2	3496943
175	sim2	3512177
176	sim2	3517915
177	sim2	3530796
178	sim2	3541207
179	sim2	3585254
180	sim2	3633940
181	sim2	3641955
182	sim2	3654471
183	sim2	3686472
184	sim2	3751881
185	sim2	3762001
186	sim2	3817650
187	sim2	3894978
188	sim2	3913175
189	sim2	4036576
190	sim2	4122756
191	sim2	4168702
192	sim2	4169144
193	sim2	4183593
194	sim2	4186267
195	sim2	4248871
196	sim2	4268478
197	sim2	4293674
198	sim2	4478655
199	sim2	4594169
200	sim2	4622928
201	sim3	71181
202	sim3	162247
203	sim3	183914
204	sim3	221266
205	sim3	364297
206	sim3	413474
207	sim3	539819
208	sim3	555991
209	sim3	622653
210	sim3	631834
211	sim3	720670
212	sim3	766234
213	sim3	799952
214	sim3	851713
215	sim3	915936
216	sim3	930680
217	sim3	951755
218	sim3	993647
219	sim3	1047619
220	sim3	1095174
221	sim3	1142139
222	sim3	1153760
223	sim3	1182149
224	sim3	1235743
225	sim3	1276958
226	sim3	1356582
227	sim3	1453849
228	sim3	1473125
229	sim3	1561800
230	sim3	1594107
231	sim3	1621157
232	sim3	1660984
233	sim3	1759239
234	sim3	1875031
235	sim3	1900160
236	sim3	1936457
237	sim3	2017556
238	sim3	2044316
239	sim3	2081486
240	sim3	2158747
241	sim3	2200710
242	sim3	2245781
243	sim3	2321969
244	sim3	2332835
245	sim3	2404428
246	sim3	2413613
247	sim3	2456482
248	sim3	2484594
249	sim3	2489386
250	sim3	2675772
251	sim3	2692331
252	sim3	2700916
253	sim3	2743671
254	sim3	2771663
255	sim3	2773270
256	sim3	2775736
257	sim3	2791595
258	sim3	2794455
259	sim3	2944211
260	sim3	2969638
261	sim3	2981293
262	sim3	3007911
263	sim3	3071039
264	sim3	3151073
265	sim3	3190441
266	sim3	3254892
267	sim3	3289760
268	sim3	3308990
269	sim3	3343918
270	sim3	3365258
271	sim3	3398863
272	sim3	3430284
273	sim3	3439374
274	sim3	3520936
275	sim3	3539631
276	sim3	3548482
277	sim3	3577842
278	sim3	3610435
279	sim3	3617327
280	sim3	3653463
281	sim3	3710579
282	sim3	3805188
283	sim3	3836208
284	sim3	3861386
285	sim3	3946052
286	sim3	3978372
287	sim3	4149779
288	sim3	4174122
289	sim3	4255873
290	sim3	4257886
291	sim3	4283254
292	sim3	4329380
293	sim3	4347975
294	sim3	4418330
295	sim3	4450717
296	sim3	4465752
297	sim3	4469622
298	sim3	4629997
299	sim3	4635383
300	sim3	4639958
301	sim4	36346
302	sim4	119770
303	sim4	218169
304	sim4	238030
305	sim4	353912
306	sim4	370195
307	sim4	390933
308	sim4	488699
309	sim4	491126
310	sim4	505247
311	sim4	587166
312	sim4	599438
313	sim4	625518
314	sim4	748683
315	sim4	784975
316	sim4	787128
317	sim4	925978
318	sim4	941810
319	sim4	949766
320	sim4	952469
321	sim4	957438
322	sim4	1000174
323	sim4	1010069
324	sim4	1018065
325	sim4	1089511
326	sim4	1100198
327	sim4	1120153
328	sim4	1273496
329	sim4	1359479
330	sim4	1388720
331	sim4	1431482
332	sim4	1485752
333	sim4	1530470
334	sim4	1530569
335	sim4	1667285
336	sim4	1669386
337	sim4	1717319
338	sim4	1746036
339	sim4	1801578
340	sim4	1874690
341	sim4	1957946
342	sim4	2022861
343	sim4	2053833
344	sim4	2088530
345	sim4	2126922
346	sim4	2131863
347	sim4	2258971
348	sim4	2268282
349	sim4	2281218
350	sim4	2415042
351	sim4	2489942
352	sim4	2515960
353	sim4	2613563
354	sim4	2638510
355	sim4	2670864
356	sim4	2733401
357	sim4	2842950
358	sim4	2920213
359	sim4	2931078
360	sim4	2941393
361	sim4	2954862
362	sim4	3019502
363	sim4	3151596
364	sim4	3156765
365	sim4	3180456
366	sim4	3205407
367	sim4	3294867
368	sim4	3309394
369	sim4	3351736
370	sim4	3366877
371	sim4	3392118
372	sim4	3440295
373	sim4	3537081
374	sim4	3634993
375	sim4	3648419
376	sim4	3660215
377	sim4	3700344
378	sim4	3765578
379	sim4	3771325
380	sim4	3825158
381	sim4	3899874
382	sim4	3946541
383	sim4	3974322
384	sim4	3987780
385	sim4	3988023
386	sim4	3990901
387	sim4	4140838
388	sim4	4188116
389	sim4	4189756
390	sim4	4209246
391	sim4	4297329
392	sim4	4338282
393	sim4	4338346
394	sim4	4378103
395	sim4	4412796
396	sim4	4490609
397	sim4	4541289
398	sim4	4547589
399	sim4	4568814
400	sim4	4600742
401	sim5	92434
402	sim5	211707
403	sim5	275753
404	sim5	285088
405	sim5	340169
406	sim5	473511
407	sim5	484993
408	sim5	513478
409	sim5	582398
410	sim5	624685
411	sim5	668439
412	sim5	708711
413	sim5	722380
414	sim5	770307
415	sim5	772624
416	sim5	802280
417	sim5	838921
418	sim5	849743
419	sim5	927273
420	sim5	1005790
421	sim5	1032995
422	sim5	1046617
423	sim5	1136708
424	sim5	1216795
425	sim5	1280454
426	sim5	1325818
427	sim5	1326634
428	sim5	1340239
429	sim5	1347554
430	sim5	1351065
431	sim5	1395060
432	sim5	1421962
433	sim5	1454343
434	sim5	1463036
435	sim5	1626400
436	sim5	1672307
437	sim5	1685413
438	sim5	1754106
439	sim5	1766339
440	sim5	1770964
441	sim5	1788533
442	sim5	1813645
443	sim5	1861846
444	sim5	1894059
445	sim5	1905151
446	sim5	1914640
447	sim5	1936055
448	sim5	1985530
449	sim5	2015094
450	sim5	2034609
451	sim5	2102212
452	sim5	2220417
453	sim5	2286926
454	sim5	2294111
455	sim5	2317578
456	sim5	2326348
457	sim5	2688433
458	sim5	2753018
459	sim5	2785755
460	sim5	2814728
461	sim5	2884378
462	sim5	2928412
463	sim5	2964574
464	sim5	3015301
465	sim5	3104990
466	sim5	3132839
467	sim5	3213386
468	sim5	3227332
469	sim5	3236674
470	sim5	3250965
471	sim5	3263731
472	sim5	3290948
473	sim5	3476572
474	sim5	3489855
475	sim5	3556328
476	sim5	3609236
477	sim5	3726458
478	sim5	3777363
479	sim5	3912661
480	sim5	3935398
481	sim5	3987218
482	sim5	3998497
483	sim5	4080631
484	sim5	4082925
485	sim5	4092408
486	sim5	4109297
487	sim5	4122593
488	sim5	4135317
489	sim5	4187157
490	sim5	4194136
491	sim5	4228089
492	sim5	4229638
493	sim5	4244761
494	sim5	4260349
495	sim5	4364720
496	sim5	4447258
497	sim5	4535600
498	sim5	4552016
499	sim5	4576388
500	sim5	4597836
501	sim6	15796
502	sim6	109346
503	sim6	119049
504	sim6	161650
505	sim6	164003
506	sim6	204259
507	sim6	264860
508	sim6	293915
509	sim6	294513
510	sim6	333377
511	sim6	351943
512	sim6	376550
513	sim6	389615
514	sim6	416776
515	sim6	427088
516	sim6	467923
517	sim6	588773
518	sim6	637182
519	sim6	664149
520	sim6	913781
521	sim6	942389
522	sim6	964196
523	sim6	1085611
524	sim6	1139858
525	sim6	1287899
526	sim6	1299087
527	sim6	1300356
528	sim6	1375409
529	sim6	1389972
530	sim6	1404885
531	sim6	1434627
532	sim6	1491879
533	sim6	1524045
534	sim6	1530469
535	sim6	1621724
536	sim6	1718922
537	sim6	1722833
538	sim6	1724574
539	sim6	1742128
540	sim6	1776446
541	sim6	1801751
542	sim6	1846232
543	sim6	1848569
544	sim6	1876024
545	sim6	1965367
546	sim6	2013991
547	sim6	2035892
548	sim6	2048866
549	sim6	2162094
550	sim6	2180351
551	sim6	2254240
552	sim6	2258007
553	sim6	2324352
554	sim6	2361207
555	sim6	2406805
556	sim6	2431774
557	sim6	2493155
558	sim6	2545195
559	sim6	2553382
560	sim6	2560113
561	sim6	2568988
562	sim6	2702757
563	sim6	2705516
564	sim6	2707588
565	sim6	2796669
566	sim6	2821392
567	sim6	2833023
568	sim6	2865785
569	sim6	2922738
570	sim6	2935779
571	sim6	3068981
572	sim6	3082947
573	sim6	3099432
574	sim6	3127471
575	sim6	3317471
576	sim6	3379301
577	sim6	3384653
578	sim6	3454829
579	sim6	3519228
580	sim6	3593911
581	sim6	3740928
582	sim6	3777008
583	sim6	3822008
584	sim6	3856716
585	sim6	3881001
586	sim6	3912492
587	sim6	3958374
588	sim6	4048712
589	sim6	4052723
590	sim6	4058719
591	sim6	4070676
592	sim6	4075609
593	sim6	4255672
594	sim6	4310350
595	sim6	4315127
596	sim6	4347000
597	sim6	4347079
598	sim6	4567092
599	sim6	4569791
600	sim6	4578648
601	sim7	33946
602	sim7	71895
603	sim7	98241
604	sim7	121127
605	sim7	246891
606	sim7	283695
607	sim7	287649
608	sim7	293593
609	sim7	300920
610	sim7	361350
611	sim7	484929
612	sim7	571247
613	sim7	626015
614	sim7	655196
615	sim7	723148
616	sim7	752879
617	sim7	774996
618	sim7	794730
619	sim7	861815
620	sim7	867277
621	sim7	867834
622	sim7	918680
623	sim7	1023489
624	sim7	1029347
625	sim7	1033724
626	sim7	1063106
627	sim7	1109521
628	sim7	1114232
629	sim7	1119208
630	sim7	1142331
631	sim7	1160231
632	sim7	1288442
633	sim7	1448964
634	sim7	1474096
635	sim7	1565651
636	sim7	1599246
637	sim7	1729614
638	sim7	1789616
639	sim7	1839455
640	sim7	1874348
641	sim7	1916540
642	sim7	1938729
643	sim7	1972152
644	sim7	1983153
645	sim7	2029386
646	sim7	2088760
647	sim7	2160659
648	sim7	2228986
649	sim7	2293595
650	sim7	2301753
651	sim7	2376996
652	sim7	2457745
653	sim7	2460147
654	sim7	2613658
655	sim7	2613813
656	sim7	2716211
657	sim7	2763067
658	sim7	2838639
659	sim7	2884349
660	sim7	2907512
661	sim7	3011196
662	sim7	3012680
663	sim7	3032718
664	sim7	3046702
665	sim7	3067561
666	sim7	3070678
667	sim7	3105223
668	sim7	3112503
669	sim7	3149308
670	sim7	3168090
671	sim7	3179067
672	sim7	3268586
673	sim7	3277208
674	sim7	3383223
675	sim7	3429888
676	sim7	3447950
677	sim7	3450556
678	sim7	3471339
679	sim7	3485250
680	sim7	3494125
681	sim7	3567323
682	sim7	3595437
683	sim7	3628211
684	sim7	3653020
685	sim7	3685313
686	sim7	3709225
687	sim7	3715874
688	sim7	3748167
689	sim7	3779409
690	sim7	3790385
691	sim7	3991229
692	sim7	4019517
693	sim7	4048990
694	sim7	4069360
695	sim7	4126788
696	sim7	4190875
697	sim7	4376944
698	sim7	4486936
699	sim7	4510454
700	sim7	4602807
701	sim8	9589
702	sim8	23941
703	sim8	59612
704	sim8	87078
705	sim8	124198
706	sim8	133163
707	sim8	191289
708	sim8	260447
709	sim8	473399
710	sim8	505965
711	sim8	534501
712	sim8	537639
713	sim8	564394
714	sim8	591209
715	sim8	667435
716	sim8	674379
717	sim8	702472
718	sim8	716587
719	sim8	818582
720	sim8	849497
721	sim8	866906
722	sim8	878537
723	sim8	940142
724	sim8	974290
725	sim8	1141140
726	sim8	1147714
727	sim8	1233070
728	sim8	1248299
729	sim8	1296359
730	sim8	1297755
731	sim8	1375362
732	sim8	1511147
733	sim8	1597019
734	sim8	1674815
735	sim8	1752476
736	sim8	1780082
737	sim8	1946705
738	sim8	2006293
739	sim8	2006418
740	sim8	2006978
741	sim8	2019045
742	sim8	2115359
743	sim8	2255350
744	sim8	2279423
745	sim8	2287877
746	sim8	2477238
747	sim8	2480137
748	sim8	2515413
749	sim8	2534536
750	sim8	2584400
751	sim8	2662886
752	sim8	2692225
753	sim8	2705613
754	sim8	2714546
755	sim8	2744599
756	sim8	2797724
757	sim8	2818625
758	sim8	2993020
759	sim8	3099625
760	sim8	3224187
761	sim8	3281862
762	sim8	3302080
763	sim8	3351169
764	sim8	3379976
765	sim8	3380529
766	sim8	3411959
767	sim8	3423763
768	sim8	3462998
769	sim8	3489995
770	sim8	3518899
771	sim8	3519519
772	sim8	3539848
773	sim8	3562267
774	sim8	3810973
775	sim8	3847239
776	sim8	3863581
777	sim8	3875064
778	sim8	3901408
779	sim8	3905865
780	sim8	3953173
781	sim8	4012531
782	sim8	4028789
783	sim8	4102022
784	sim8	4233912
785	sim8	4248522
786	sim8	4263470
787	sim8	4301931
788	sim8	4330769
789	sim8	4384322
790	sim8	4460617
791	sim8	4467743
792	sim8	4491303
793	sim8	4500933
794	sim8	4521939
795	sim8	4531180
796	sim8	4533951
797	sim8	4538104
798	sim8	4570817
799	sim8	4585246
800	sim8	4604727
801	sim9	5404
802	sim9	103445
803	sim9	164735
804	sim9	197697
805	sim9	214644
806	sim9	277537
807	sim9	296782
808	sim9	382680
809	sim9	463776
810	sim9	487728
811	sim9	537965
812	sim9	566015
813	sim9	637184
814	sim9	638734
815	sim9	754397
816	sim9	777334
817	sim9	821761
818	sim9	824109
819	sim9	827914
820	sim9	942173
821	sim9	990784
822	sim9	1020279
823	sim9	1020971
824	sim9	1181937
825	sim9	1213364
826	sim9	1273376
827	sim9	1285255
828	sim9	1310952
829	sim9	1338038
830	sim9	1423120
831	sim9	1461466
832	sim9	1572742
833	sim9	1624191
834	sim9	1685635
835	sim9	1743444
836	sim9	1773246
837	sim9	1775852
838	sim9	1813545
839	sim9	1862116
840	sim9	1909761
841	sim9	1915791
842	sim9	1927824
843	sim9	1993170
844	sim9	2058543
845	sim9	2094323
846	sim9	2170556
847	sim9	2201337
848	sim9	2205067
849	sim9	2207015
850	sim9	2394121
851	sim9	2437074
852	sim9	2449652
853	sim9	2450818
854	sim9	2555105
855	sim9	2560860
856	sim9	2566817
857	sim9	2600141
858	sim9	2603845
859	sim9	2634464
860	sim9	2664311
861	sim9	2704099
862	sim9	2819307
863	sim9	2822612
864	sim9	2931777
865	sim9	2935504
866	sim9	3134538
867	sim9	3143865
868	sim9	3159671
869	sim9	3171256
870	sim9	3174444
871	sim9	3174523
872	sim9	3176760
873	sim9	3218904
874	sim9	3405976
875	sim9	3465328
876	sim9	3478589
877	sim9	3583426
878	sim9	3613800
879	sim9	3684546
880	sim9	3850818
881	sim9	3892448
882	sim9	3993808
883	sim9	4043870
884	sim9	4049868
885	sim9	4096097
886	sim9	4124610
887	sim9	4156647
888	sim9	4172070
889	sim9	4191995
890	sim9	4207352
891	sim9	4211201
892	sim9	4233919
893	sim9	4249426
894	sim9	4320529
895	sim9	4424698
896	sim9	4447468
897	sim9	4449671
898	sim9	4483837
899	sim9	4512686
900	sim9	4535433
901	sim10	606
902	sim10	10899
903	sim10	24656
904	sim10	31815
905	sim10	201940
906	sim10	251053
907	sim10	309030
908	sim10	509513
909	sim10	557112
910	sim10	592498
911	sim10	637245
912	sim10	771342
913	sim10	800629
914	sim10	828778
915	sim10	843989
916	sim10	916144
917	sim10	1065368
918	sim10	1194247
919	sim10	1223127
920	sim10	1260133
921	sim10	1262990
922	sim10	1361495
923	sim10	1367631
924	sim10	1433494
925	sim10	1565522
926	sim10	1571088
927	sim10	1579999
928	sim10	1613064
929	sim10	1621533
930	sim10	1650571
931	sim10	1687890
932	sim10	1718090
933	sim10	1726379
934	sim10	1838465
935	sim10	1858811
936	sim10	1899065
937	sim10	1907493
938	sim10	1924412
939	sim10	1942736
940	sim10	1964417
941	sim10	2029585
942	sim10	2059239
943	sim10	2089233
944	sim10	2116351
945	sim10	2164269
946	sim10	2220232
947	sim10	2225162
948	sim10	2279447
949	sim10	2336295
950	sim10	2403789
951	sim10	2407784
952	sim10	2449885
953	sim10	2474280
954	sim10	2517121
955	sim10	2521813
956	sim10	2553453
957	sim10	2652541
958	sim10	2688809
959	sim10	2730180
960	sim10	2730936
961	sim10	2767076
962	sim10	3003465
963	sim10	3110612
964	sim10	3239566
965	sim10	3269244
966	sim10	3341029
967	sim10	3348610
968	sim10	3384273
969	sim10	3436400
970	sim10	3548957
971	sim10	3573612
972	sim10	3581749
973	sim10	3846250
974	sim10	3910474
975	sim10	3913276
976	sim10	3924503
977	sim10	3941877
978	sim10	3974727
979	sim10	3985512
980	sim10	3990286
981	sim10	4053225
982	sim10	4143959
983	sim10	4144530
984	sim10	4164642
985	sim10	4197368
986	sim10	4198207
987	sim10	4221456
988	sim10	4232559
989	sim10	4345960
990	sim10	4355122
991	sim10	4408156
992	sim10	4411355
993	sim10	4421271
994	sim10	4441836
995	sim10	4442369
996	sim10	4451990
997	sim10	4453126
998	sim10	4462294
999	sim10	4596979
1000	sim10	4626268
1001	sim11	33748
1002	sim11	81723
1003	sim11	191603
1004	sim11	196410
1005	sim11	198330
1006	sim11	215901
1007	sim11	307752
1008	sim11	307869
1009	sim11	339947
1010	sim11	521733
1011	sim11	553294
1012	sim11	660682
1013	sim11	672848
1014	sim11	677765
1015	sim11	698352
1016	sim11	740328
1017	sim11	842853
1018	sim11	873149
1019	sim11	893879
1020	sim11	982236
1021	sim11	1024310
1022	sim11	1070614
1023	sim11	1236460
1024	sim11	1300678
1025	sim11	1345340
1026	sim11	1379520
1027	sim11	1444151
1028	sim11	1454002
1029	sim11	1473256
1030	sim11	1477234
1031	sim11	1502979
1032	sim11	1590442
1033	sim11	1613086
1034	sim11	1688524
1035	sim11	1716448
1036	sim11	1806804
1037	sim11	1816063
1038	sim11	1828840
1039	sim11	1874653
1040	sim11	1880892
1041	sim11	1921741
1042	sim11	1923786
1043	sim11	1934553
1044	sim11	1967302
1045	sim11	2018467
1046	sim11	2035882
1047	sim11	2055628
1048	sim11	2103289
1049	sim11	2165907
1050	sim11	2226102
1051	sim11	2271982
1052	sim11	2284089
1053	sim11	2292578
1054	sim11	2299432
1055	sim11	2315131
1056	sim11	2321539
1057	sim11	2349015
1058	sim11	2349103
1059	sim11	2374259
1060	sim11	2558722
1061	sim11	2694323
1062	sim11	2697120
1063	sim11	2854315
1064	sim11	2888949
1065	sim11	2903305
1066	sim11	2922794
1067	sim11	2924066
1068	sim11	2970684
1069	sim11	2980972
1070	sim11	3041751
1071	sim11	3087565
1072	sim11	3177045
1073	sim11	3324761
1074	sim11	3475789
1075	sim11	3517303
1076	sim11	3631019
1077	sim11	3638570
1078	sim11	3661079
1079	sim11	3814034
1080	sim11	3862523
1081	sim11	3871099
1082	sim11	3882350
1083	sim11	3912203
1084	sim11	3933746
1085	sim11	4003539
1086	sim11	4113330
1087	sim11	4120871
1088	sim11	4122306
1089	sim11	4127179
1090	sim11	4154096
1091	sim11	4192126
1092	sim11	4244705
1093	sim11	4352805
1094	sim11	4376379
1095	sim11	4395843
1096	sim11	4468878
1097	sim11	4481928
1098	sim11	4511262
1099	sim11	4564824
1100	sim11	4636712
1101	sim12	538
1102	sim12	10172
1103	sim12	18934
1104	sim12	32212
1105	sim12	122018
1106	sim12	137235
1107	sim12	141201
1108	sim12	166640
1109	sim12	172706
1110	sim12	212187
1111	sim12	293812
1112	sim12	313962
1113	sim12	328533
1114	sim12	355826
1115	sim12	375520
1116	sim12	426388
1117	sim12	669779
1118	sim12	699569
1119	sim12	723535
1120	sim12	952747
1121	sim12	1079313
1122	sim12	1137550
1123	sim12	1206070
1124	sim12	1213447
1125	sim12	1221173
1126	sim12	1236002
1127	sim12	1241305
1128	sim12	1301444
1129	sim12	1459878
1130	sim12	1515890
1131	sim12	1536891
1132	sim12	1586903
1133	sim12	1631121
1134	sim12	1633092
1135	sim12	1671309
1136	sim12	1741162
1137	sim12	1764366
1138	sim12	1790606
1139	sim12	1873855
1140	sim12	1953822
1141	sim12	2009760
1142	sim12	2035652
1143	sim12	2044135
1144	sim12	2102095
1145	sim12	2133422
1146	sim12	2133472
1147	sim12	2141993
1148	sim12	2193521
1149	sim12	2234611
1150	sim12	2408074
1151	sim12	2450822
1152	sim12	2459173
1153	sim12	2474412
1154	sim12	2494741
1155	sim12	2580293
1156	sim12	2583960
1157	sim12	2662285
1158	sim12	2700341
1159	sim12	2737473
1160	sim12	2740034
1161	sim12	2749494
1162	sim12	2794433
1163	sim12	2814618
1164	sim12	2970000
1165	sim12	3052560
1166	sim12	3060229
1167	sim12	3135301
1168	sim12	3136680
1169	sim12	3273583
1170	sim12	3310793
1171	sim12	3471411
1172	sim12	3535426
1173	sim12	3554433
1174	sim12	3562934
1175	sim12	3573313
1176	sim12	3614204
1177	sim12	3654725
1178	sim12	3669798
1179	sim12	3678708
1180	sim12	3835185
1181	sim12	3895280
1182	sim12	3912993
1183	sim12	3953761
1184	sim12	3961856
1185	sim12	4033992
1186	sim12	4039553
1187	sim12	4078450
1188	sim12	4102879
1189	sim12	4169015
1190	sim12	4275974
1191	sim12	4312386
1192	sim12	4355795
1193	sim12	4355851
1194	sim12	4376933
1195	sim12	4428611
1196	sim12	4445700
1197	sim12	4455100
1198	sim12	4459308
1199	sim12	4495670
1200	sim12	4522755
1201	sim13	106169
1202	sim13	147408
1203	sim13	157884
1204	sim13	196467
1205	sim13	237228
1206	sim13	401483
1207	sim13	469297
1208	sim13	482571
1209	sim13	494829
1210	sim13	509942
1211	sim13	552021
1212	sim13	553622
1213	sim13	578670
1214	sim13	703850
1215	sim13	707784
1216	sim13	782495
1217	sim13	892385
1218	sim13	1013658
1219	sim13	1079757
1220	sim13	1087229
1221	sim13	1098760
1222	sim13	1141248
1223	sim13	1247127
1224	sim13	1344765
1225	sim13	1356752
1226	sim13	1373593
1227	sim13	1375627
1228	sim13	1408099
1229	sim13	1476088
1230	sim13	1515628
1231	sim13	1525815
1232	sim13	1545086
1233	sim13	1556082
1234	sim13	1574811
1235	sim13	1596796
1236	sim13	1639829
1237	sim13	1731199
1238	sim13	1791863
1239	sim13	1904392
1240	sim13	1908504
1241	sim13	1910152
1242	sim13	1922619
1243	sim13	1943768
1244	sim13	1988972
1245	sim13	1992020
1246	sim13	1996848
1247	sim13	2020649
1248	sim13	2022779
1249	sim13	2028347
1250	sim13	2046136
1251	sim13	2115401
1252	sim13	2134899
1253	sim13	2169215
1254	sim13	2194951
1255	sim13	2238258
1256	sim13	2265642
1257	sim13	2301993
1258	sim13	2309844
1259	sim13	2319780
1260	sim13	2342256
1261	sim13	2349504
1262	sim13	2361648
1263	sim13	2585238
1264	sim13	2696978
1265	sim13	2745629
1266	sim13	2773277
1267	sim13	2792968
1268	sim13	2829995
1269	sim13	3090520
1270	sim13	3177396
1271	sim13	3199736
1272	sim13	3234669
1273	sim13	3273514
1274	sim13	3292398
1275	sim13	3310573
1276	sim13	3430689
1277	sim13	3511471
1278	sim13	3551125
1279	sim13	3553125
1280	sim13	3801365
1281	sim13	3814748
1282	sim13	3965747
1283	sim13	3992368
1284	sim13	4020750
1285	sim13	4031059
1286	sim13	4146473
1287	sim13	4180021
1288	sim13	4218883
1289	sim13	4331331
1290	sim13	4342152
1291	sim13	4387754
1292	sim13	4436048
1293	sim13	4493749
1294	sim13	4515303
1295	sim13	4522107
1296	sim13	4522677
1297	sim13	4558023
1298	sim13	4605098
1299	sim13	4610938
1300	sim13	4615839
1301	sim14	134523
1302	sim14	190391
1303	sim14	193875
1304	sim14	291651
1305	sim14	312562
1306	sim14	342732
1307	sim14	572088
1308	sim14	601664
1309	sim14	733146
1310	sim14	738612
1311	sim14	795342
1312	sim14	832302
1313	sim14	841696
1314	sim14	865034
1315	sim14	874138
1316	sim14	879662
1317	sim14	895802
1318	sim14	971957
1319	sim14	1056352
1320	sim14	1131062
1321	sim14	1136838
1322	sim14	1153714
1323	sim14	1163364
1324	sim14	1222555
1325	sim14	1312058
1326	sim14	1384862
1327	sim14	1415275
1328	sim14	1428671
1329	sim14	1490687
1330	sim14	1530046
1331	sim14	1615909
1332	sim14	1652705
1333	sim14	1657825
1334	sim14	1661982
1335	sim14	1666385
1336	sim14	1690893
1337	sim14	1735075
1338	sim14	1797950
1339	sim14	1907526
1340	sim14	1994601
1341	sim14	2002730
1342	sim14	2009773
1343	sim14	2158906
1344	sim14	2167971
1345	sim14	2178599
1346	sim14	2319393
1347	sim14	2386054
1348	sim14	2393047
1349	sim14	2402547
1350	sim14	2507418
1351	sim14	2513061
1352	sim14	2568799
1353	sim14	2621353
1354	sim14	2711275
1355	sim14	2742377
1356	sim14	2820289
1357	sim14	2825757
1358	sim14	2984924
1359	sim14	2999327
1360	sim14	3047993
1361	sim14	3060547
1362	sim14	3101938
1363	sim14	3199454
1364	sim14	3235343
1365	sim14	3240758
1366	sim14	3252961
1367	sim14	3257333
1368	sim14	3297667
1369	sim14	3325214
1370	sim14	3328767
1371	sim14	3411192
1372	sim14	3463287
1373	sim14	3470837
1374	sim14	3509561
1375	sim14	3552557
1376	sim14	3555595
1377	sim14	3614442
1378	sim14	3646010
1379	sim14	3821422
1380	sim14	3902247
1381	sim14	4003018
1382	sim14	4165460
1383	sim14	4170560
1384	sim14	4186417
1385	sim14	4197273
1386	sim14	4244093
1387	sim14	4277450
1388	sim14	4283184
1389	sim14	4296458
1390	sim14	4349388
1391	sim14	4393868
1392	sim14	4409400
1393	sim14	4425078
1394	sim14	4450409
1395	sim14	4457519
1396	sim14	4535044
1397	sim14	4554177
1398	sim14	4613738
1399	sim14	4614007
1400	sim14	4622938
1401	sim15	41257
1402	sim15	56578
1403	sim15	287751
1404	sim15	302258
1405	sim15	330239
1406	sim15	334716
1407	sim15	448092
1408	sim15	487007
1409	sim15	508780
1410	sim15	546897
1411	sim15	584149
1412	sim15	659691
1413	sim15	695559
1414	sim15	762537
1415	sim15	770391
1416	sim15	887465
1417	sim15	924238
1418	sim15	924871
1419	sim15	935348
1420	sim15	1046107
1421	sim15	1051205
1422	sim15	1101100
1423	sim15	1134600
1424	sim15	1187382
1425	sim15	1191265
1426	sim15	1248516
1427	sim15	1307272
1428	sim15	1325692
1429	sim15	1371366
1430	sim15	1432038
1431	sim15	1475352
1432	sim15	1479824
1433	sim15	1573335
1434	sim15	1617449
1435	sim15	1651470
1436	sim15	1678112
1437	sim15	1687533
1438	sim15	1734536
1439	sim15	1738907
1440	sim15	1751600
1441	sim15	1772510
1442	sim15	1891292
1443	sim15	1912251
1444	sim15	1976259
1445	sim15	2010657
1446	sim15	2075377
1447	sim15	2150842
1448	sim15	2214023
1449	sim15	2239836
1450	sim15	2285238
1451	sim15	2410046
1452	sim15	2433136
1453	sim15	2459310
1454	sim15	2482642
1455	sim15	2517155
1456	sim15	2522684
1457	sim15	2612629
1458	sim15	2634228
1459	sim15	2667405
1460	sim15	2827539
1461	sim15	2831535
1462	sim15	2856954
1463	sim15	2891679
1464	sim15	2997186
1465	sim15	3022820
1466	sim15	3032797
1467	sim15	3032972
1468	sim15	3093356
1469	sim15	3185284
1470	sim15	3299843
1471	sim15	3304341
1472	sim15	3334921
1473	sim15	3360821
1474	sim15	3363125
1475	sim15	3419911
1476	sim15	3427288
1477	sim15	3432931
1478	sim15	3490313
1479	sim15	3518786
1480	sim15	3527682
1481	sim15	3535497
1482	sim15	3556336
1483	sim15	3564205
1484	sim15	3663290
1485	sim15	3706705
1486	sim15	3714605
1487	sim15	3767009
1488	sim15	3776301
1489	sim15	3820991
1490	sim15	3906259
1491	sim15	3973763
1492	sim15	4140190
1493	sim15	4187436
1494	sim15	4279794
1495	sim15	4336280
1496	sim15	4445951
1497	sim15	4446378
1498	sim15	4481241
1499	sim15	4490455
1500	sim15	4495187
1501	sim16	35642
1502	sim16	96308
1503	sim16	142952
1504	sim16	154841
1505	sim16	186368
1506	sim16	195967
1507	sim16	204471
1508	sim16	216123
1509	sim16	221207
1510	sim16	243414
1511	sim16	273974
1512	sim16	366437
1513	sim16	377595
1514	sim16	525264
1515	sim16	570410
1516	sim16	641894
1517	sim16	682143
1518	sim16	740235
1519	sim16	775375
1520	sim16	857684
1521	sim16	876901
1522	sim16	978620
1523	sim16	980984
1524	sim16	1055296
1525	sim16	1148377
1526	sim16	1154429
1527	sim16	1171348
1528	sim16	1254454
1529	sim16	1291671
1530	sim16	1300801
1531	sim16	1344254
1532	sim16	1350712
1533	sim16	1464534
1534	sim16	1545864
1535	sim16	1621629
1536	sim16	1630740
1537	sim16	1711339
1538	sim16	1725726
1539	sim16	1811466
1540	sim16	1904323
1541	sim16	1935730
1542	sim16	1977819
1543	sim16	2096577
1544	sim16	2130222
1545	sim16	2181851
1546	sim16	2184595
1547	sim16	2184772
1548	sim16	2269338
1549	sim16	2314604
1550	sim16	2355307
1551	sim16	2424001
1552	sim16	2464659
1553	sim16	2469564
1554	sim16	2511889
1555	sim16	2516242
1556	sim16	2552338
1557	sim16	2612057
1558	sim16	2645877
1559	sim16	2674079
1560	sim16	2688274
1561	sim16	2751856
1562	sim16	2775862
1563	sim16	2785263
1564	sim16	2805955
1565	sim16	2818643
1566	sim16	3006251
1567	sim16	3057797
1568	sim16	3123354
1569	sim16	3127686
1570	sim16	3142394
1571	sim16	3244245
1572	sim16	3265701
1573	sim16	3384064
1574	sim16	3410911
1575	sim16	3440510
1576	sim16	3498744
1577	sim16	3625550
1578	sim16	3682385
1579	sim16	3689577
1580	sim16	3695871
1581	sim16	3718652
1582	sim16	3726690
1583	sim16	3989748
1584	sim16	4063433
1585	sim16	4151206
1586	sim16	4201782
1587	sim16	4214563
1588	sim16	4272361
1589	sim16	4290686
1590	sim16	4303079
1591	sim16	4349275
1592	sim16	4380676
1593	sim16	4385154
1594	sim16	4395393
1595	sim16	4399576
1596	sim16	4403638
1597	sim16	4425640
1598	sim16	4521365
1599	sim16	4533985
1600	sim16	4561765
1601	sim17	16040
1602	sim17	73155
1603	sim17	91290
1604	sim17	200285
1605	sim17	206202
1606	sim17	269332
1607	sim17	333143
1608	sim17	401701
1609	sim17	465595
1610	sim17	498388
1611	sim17	541057
1612	sim17	543236
1613	sim17	557912
1614	sim17	641701
1615	sim17	689690
1616	sim17	713425
1617	sim17	718601
1618	sim17	804484
1619	sim17	840347
1620	sim17	879710
1621	sim17	969756
1622	sim17	972679
1623	sim17	983246
1624	sim17	1006684
1625	sim17	1087322
1626	sim17	1134526
1627	sim17	1142795
1628	sim17	1176476
1629	sim17	1186945
1630	sim17	1223703
1631	sim17	1248959
1632	sim17	1255432
1633	sim17	1311036
1634	sim17	1330867
1635	sim17	1401760
1636	sim17	1487607
1637	sim17	1494376
1638	sim17	1575677
1639	sim17	1605469
1640	sim17	1605913
1641	sim17	1731327
1642	sim17	1738201
1643	sim17	1755796
1644	sim17	1819194
1645	sim17	2058471
1646	sim17	2079264
1647	sim17	2092068
1648	sim17	2092819
1649	sim17	2179544
1650	sim17	2272284
1651	sim17	2297113
1652	sim17	2318168
1653	sim17	2323438
1654	sim17	2381390
1655	sim17	2392367
1656	sim17	2435000
1657	sim17	2444989
1658	sim17	2486494
1659	sim17	2589602
1660	sim17	2670210
1661	sim17	2756090
1662	sim17	2859207
1663	sim17	2899079
1664	sim17	2921824
1665	sim17	2950939
1666	sim17	2997381
1667	sim17	3030808
1668	sim17	3040665
1669	sim17	3044258
1670	sim17	3059938
1671	sim17	3124203
1672	sim17	3144438
1673	sim17	3167619
1674	sim17	3419026
1675	sim17	3448475
1676	sim17	3465593
1677	sim17	3538000
1678	sim17	3595616
1679	sim17	3616534
1680	sim17	3673033
1681	sim17	3704538
1682	sim17	3719699
1683	sim17	3720910
1684	sim17	3803513
1685	sim17	3846561
1686	sim17	3850196
1687	sim17	4008461
1688	sim17	4023249
1689	sim17	4029981
1690	sim17	4062786
1691	sim17	4106395
1692	sim17	4109488
1693	sim17	4204498
1694	sim17	4218739
1695	sim17	4238934
1696	sim17	4281013
1697	sim17	4369288
1698	sim17	4405739
1699	sim17	4433077
1700	sim17	4561531
1701	sim18	56085
1702	sim18	76040
1703	sim18	101347
1704	sim18	118156
1705	sim18	167960
1706	sim18	224876
1707	sim18	262320
1708	sim18	263427
1709	sim18	309834
1710	sim18	333767
1711	sim18	379418
1712	sim18	444495
1713	sim18	542564
1714	sim18	651100
1715	sim18	748692
1716	sim18	796066
1717	sim18	866333
1718	sim18	896990
1719	sim18	909335
1720	sim18	917679
1721	sim18	929146
1722	sim18	937158
1723	sim18	965678
1724	sim18	1027346
1725	sim18	1082802
1726	sim18	1096522
1727	sim18	1148190
1728	sim18	1374540
1729	sim18	1407601
1730	sim18	1651257
1731	sim18	1684224
1732	sim18	1709288
1733	sim18	1750872
1734	sim18	1759217
1735	sim18	1783874
1736	sim18	1863313
1737	sim18	1879642
1738	sim18	1930157
1739	sim18	2058709
1740	sim18	2063136
1741	sim18	2110724
1742	sim18	2206849
1743	sim18	2207105
1744	sim18	2231590
1745	sim18	2491014
1746	sim18	2577863
1747	sim18	2581015
1748	sim18	2592671
1749	sim18	2596183
1750	sim18	2607886
1751	sim18	2614658
1752	sim18	2650812
1753	sim18	2672285
1754	sim18	2677541
1755	sim18	2769010
1756	sim18	2786190
1757	sim18	2837124
1758	sim18	2891920
1759	sim18	2907754
1760	sim18	2946209
1761	sim18	2993619
1762	sim18	3028184
1763	sim18	3045066
1764	sim18	3134312
1765	sim18	3251617
1766	sim18	3288402
1767	sim18	3381554
1768	sim18	3414300
1769	sim18	3430142
1770	sim18	3451366
1771	sim18	3481295
1772	sim18	3500012
1773	sim18	3509701
1774	sim18	3551384
1775	sim18	3604684
1776	sim18	3614275
1777	sim18	3643137
1778	sim18	3678440
1779	sim18	3720672
1780	sim18	3722048
1781	sim18	3723821
1782	sim18	3775983
1783	sim18	3812839
1784	sim18	3820726
1785	sim18	3890751
1786	sim18	3906814
1787	sim18	3963062
1788	sim18	3987356
1789	sim18	4005118
1790	sim18	4039390
1791	sim18	4042203
1792	sim18	4083707
1793	sim18	4232710
1794	sim18	4277628
1795	sim18	4335819
1796	sim18	4375806
1797	sim18	4397532
1798	sim18	4462152
1799	sim18	4563847
1800	sim18	4639248
1801	sim19	224893
1802	sim19	241018
1803	sim19	248296
1804	sim19	261352
1805	sim19	295764
1806	sim19	352611
1807	sim19	379830
1808	sim19	430786
1809	sim19	466041
1810	sim19	518460
1811	sim19	614807
1812	sim19	803437
1813	sim19	870295
1814	sim19	978131
1815	sim19	1050549
1816	sim19	1186270
1817	sim19	1187663
1818	sim19	1188995
1819	sim19	1190798
1820	sim19	1191500
1821	sim19	1262148
1822	sim19	1271596
1823	sim19	1280854
1824	sim19	1373794
1825	sim19	1395367
1826	sim19	1454780
1827	sim19	1473351
1828	sim19	1529724
1829	sim19	1576503
1830	sim19	1652218
1831	sim19	1652227
1832	sim19	1693219
1833	sim19	1731368
1834	sim19	1756900
1835	sim19	1851116
1836	sim19	1899744
1837	sim19	1945685
1838	sim19	1961282
1839	sim19	1980541
1840	sim19	1981099
1841	sim19	1988559
1842	sim19	2033624
1843	sim19	2048329
1844	sim19	2081671
1845	sim19	2105247
1846	sim19	2137382
1847	sim19	2414480
1848	sim19	2414819
1849	sim19	2497153
1850	sim19	2616187
1851	sim19	2625776
1852	sim19	2777213
1853	sim19	2780469
1854	sim19	2878580
1855	sim19	2901241
1856	sim19	2906945
1857	sim19	2916479
1858	sim19	2927695
1859	sim19	2966101
1860	sim19	3021864
1861	sim19	3047783
1862	sim19	3065740
1863	sim19	3164260
1864	sim19	3244825
1865	sim19	3370599
1866	sim19	3374570
1867	sim19	3416048
1868	sim19	3448583
1869	sim19	3476623
1870	sim19	3615378
1871	sim19	3637652
1872	sim19	3648998
1873	sim19	3685073
1874	sim19	3784797
1875	sim19	3824573
1876	sim19	3850729
1877	sim19	3930997
1878	sim19	3946639
1879	sim19	4061781
1880	sim19	4063284
1881	sim19	4070683
1882	sim19	4080217
1883	sim19	4101809
1884	sim19	4105202
1885	sim19	4113682
1886	sim19	4115697
1887	sim19	4164682
1888	sim19	4191405
1889	sim19	4224172
1890	sim19	4354550
1891	sim19	4377954
1892	sim19	4395328
1893	sim19	4398588
1894	sim19	4458436
1895	sim19	4474816
1896	sim19	4513404
1897	sim19	4575606
1898	sim19	4605761
1899	sim19	4628184
1900	sim19	4634328
1901	sim20	32943
1902	sim20	75150
1903	sim20	163175
1904	sim20	183739
1905	sim20	240463
1906	sim20	277739
1907	sim20	313359
1908	sim20	351749
1909	sim20	363807
1910	sim20	431277
1911	sim20	458784
1912	sim20	485576
1913	sim20	645064
1914	sim20	725234
1915	sim20	768341
1916	sim20	807279
1917	sim20	849203
1918	sim20	881085
1919	sim20	953982
1920	sim20	985111
1921	sim20	1051675
1922	sim20	1055138
1923	sim20	1090627
1924	sim20	1131952
1925	sim20	1143923
1926	sim20	1191177
1927	sim20	1255970
1928	sim20	1315843
1929	sim20	1330774
1930	sim20	1356881
1931	sim20	1379207
1932	sim20	1490899
1933	sim20	1493213
1934	sim20	1613472
1935	sim20	1620315
1936	sim20	1637543
1937	sim20	1655420
1938	sim20	1672438
1939	sim20	1709371
1940	sim20	1747757
1941	sim20	1756236
1942	sim20	1765620
1943	sim20	1787704
1944	sim20	1808960
1945	sim20	1862414
1946	sim20	1962668
1947	sim20	1965646
1948	sim20	2047103
1949	sim20	2103495
1950	sim20	2160332
1951	sim20	2193864
1952	sim20	2231459
1953	sim20	2232814
1954	sim20	2259029
1955	sim20	2320357
1956	sim20	2344895
1957	sim20	2465663
1958	sim20	2512694
1959	sim20	2525719
1960	sim20	2536765
1961	sim20	2540062
1962	sim20	2547765
1963	sim20	2558421
1964	sim20	2628460
1965	sim20	2686886
1966	sim20	2763693
1967	sim20	2786455
1968	sim20	2805947
1969	sim20	2970877
1970	sim20	3146287
1971	sim20	3201664
1972	sim20	3201848
1973	sim20	3285116
1974	sim20	3458949
1975	sim20	3600110
1976	sim20	3612528
1977	sim20	3715736
1978	sim20	3726928
1979	sim20	3732391
1980	sim20	3738949
1981	sim20	3764537
1982	sim20	3768314
1983	sim20	3901543
1984	sim20	3954473
1985	sim20	3955373
1986	sim20	3973768
1987	sim20	3983153
1988	sim20	3995291
1989	sim20	3995664
1990	sim20	4014845
1991	sim20	4084785
1992	sim20	4105847
1993	sim20	4123262
1994	sim20	4217223
1995	sim20	4270094
1996	sim20	4295234
1997	sim20	4318554
1998	sim20	4532824
1999	sim20	4594772
[truncated: 1,001 more rows]

## Sheet: ISCompare results(ISFinder DB) 
TP	TP*	FP	FP*	FN	FN*	ID	Sim_I	Location₁	ID1	sim_i	ISCompare.ID	ISID	ISstart	ISend	Query.ID1	Start1	End1	Query.ID2	Start2	End2	REF.ID1	REF.Start1	REF.End1	REF.ID2	REF.Start2	REF.End2	Description	Observations	IS_Match_Type	QUERY_Flank1.locus_tag	QUERY_Flank1.Product	QUERY_Flank2.locus_tag	QUERY_Flank2.Product	REF_Flank1.locus_tag	REF.Product_Flank1	REF_Flank2.locus_tag	REF.Product_Flank2	Scaffold_Size
1	1					1	sim1	28586	1	sim1	0	IS30_IS30	28586	29806.0	NC_000913.3_art_ISs	28085.0	28585.0		29807.0	30307.0	NC_000913.3	28085.0				29086.0	IS only present in query Strain.	1. DLIS	Complete IS hit.	b0030	ribonucleoside hydrolase RihC	-	Intergenic/Pseudo/Repeaed Region	b0030	ribonucleoside hydrolase RihC	b0031	4-hydroxy-tetrahydrodipicolinate reductase	4763752.0
1	1					2	sim1	46521	2	sim1	1	IS30_IS30	46521	47741.0	NC_000913.3_art_ISs	46020.0	46520.0		47742.0	48242.0	NC_000913.3	44799.0				45800.0	IS only present in query Strain.	1. DLIS	Complete IS hit.	-	Intergenic/Pseudo/Repeaed Region	-	Intergenic/Pseudo/Repeaed Region	b0043	putative oxidoreductase FixC	-	Intergenic/Pseudo/Repeaed Region	4763752.0
1	1					3	sim1	136654	3	sim1	2	IS30_IS30	136654	137874.0	NC_000913.3_art_ISs	136153.0	136653.0		137875.0	138375.0	NC_000913.3	133711.0				134712.0	IS only present in query Strain.	1. DLIS	Complete IS hit.	-	Intergenic/Pseudo/Repeaed Region	b0119	UPF0231 family protein YacL	b0118	hypothetical protein	b0119	UPF0231 family protein YacL	4763752.0
1	1					4	sim1	185377	4	sim1	3	IS30_IS30	185377	186597.0	NC_000913.3_art_ISs	184876.0	185376.0		186598.0	187098.0	NC_000913.3	181213.0				182214.0	IS only present in query Strain.	1. DLIS	Complete IS hit.	-	Intergenic/Pseudo/Repeaed Region	-	Intergenic/Pseudo/Repeaed Region	b0161	periplasmic serine endoprotease DegP	b0161	periplasmic serine endoprotease DegP	4763752.0
1	1					5	sim1	221159	5	sim1	4	IS30_IS30	221159	222379.0	NC_000913.3_art_ISs	220658.0	221158.0		222380.0	222880.0	NC_000913.3	215774.0				216775.0	IS only present in query Strain.	1. DLIS	Complete IS hit.	b0192	lipoprotein NlpE	-	Intergenic/Pseudo/Repeaed Region	b0192	lipoprotein NlpE	b0193	peptidase C92 family protein	4763752.0
1	1					9	sim1	281993	6	sim1	5	IS30_IS30	281993	283213.0	NC_000913.3_art_ISs	281492.0	281992.0		283214.0	283714.0	NC_000913.3	271724.0				272725.0	IS only present in query Strain.	1. DLIS	Complete IS hit.	b0256	IS30 transposase	-	Intergenic/Pseudo/Repeaed Region	b0256	IS30 transposase	-	Intergenic/Pseudo/Repeaed Region	4763752.0
1	1					10	sim1	319554	7	sim1	6	IS30_IS30	319554	320774.0	NC_000913.3_art_ISs	319053.0	319553.0		320775.0	321275.0	NC_000913.3	308064.0				309065.0	IS only present in query Strain.	1. DLIS	Complete IS hit.	-	Intergenic/Pseudo/Repeaed Region	-	Intergenic/Pseudo/Repeaed Region	b0291	putative fimbrial usher protein EcpC	b0291	putative fimbrial usher protein EcpC	4763752.0
1	1					11	sim1	339984	8	sim1	7	IS30_IS30	339984	341204.0	NC_000913.3_art_ISs	339483.0	339983.0		341205.0	341705.0	NC_000913.3	327273.0				328274.0	IS only present in query Strain.	1. DLIS	Complete IS hit.	-	Intergenic/Pseudo/Repeaed Region	-	Intergenic/Pseudo/Repeaed Region	b0312	betaine aldehyde dehydrogenase	b0312	betaine aldehyde dehydrogenase	4763752.0
1	1					12	sim1	411873	9	sim1	8	IS30_IS30	411873	413093.0	NC_000913.3_art_ISs	411372.0	411872.0		413094.0	413594.0	NC_000913.3	397941.0				398942.0	IS only present in query Strain.	1. DLIS	Complete IS hit.	-	Intergenic/Pseudo/Repeaed Region	-	Intergenic/Pseudo/Repeaed Region	b0378	surface-exposed outer membrane lipoprotein	b0378	surface-exposed outer membrane lipoprotein	4763752.0
1	1					13	sim1	481930	10	sim1	9	IS30_IS30	481930	483150.0	NC_000913.3_art_ISs	481429.0	481929.0		483151.0	483651.0	NC_000913.3	466777.0				467778.0	IS only present in query Strain.	1. DLIS	Complete IS hit.	-	Intergenic/Pseudo/Repeaed Region	b0446	HMP-PP phosphatase	b0445	putative protein YbaE	b0446	HMP-PP phosphatase	4763752.0
1	1					14	sim1	533477	11	sim1	10	IS30_IS30	533477	534697.0	NC_000913.3_art_ISs	532976.0	533476.0		534698.0	535198.0	NC_000913.3	517103.0				518104.0	IS only present in query Strain.	1. DLIS	Complete IS hit.	b0491	putative iron ABC exporter membrane subunit FetB	-	Intergenic/Pseudo/Repeaed Region	b0491	putative iron ABC exporter membrane subunit FetB	b0492	chaperedoxin	4763752.0
1	1					15	sim1	628217	12	sim1	11	IS30_IS30	628217	629437.0	NC_000913.3_art_ISs	627716.0	628216.0		629438.0	629938.0	NC_000913.3	610622.0				611623.0	IS only present in query Strain.	1. DLIS	Complete IS hit.	-	Intergenic/Pseudo/Repeaed Region	-	Intergenic/Pseudo/Repeaed Region	b0584	ferric enterobactin outer membrane transporter	b0584	ferric enterobactin outer membrane transporter	4763752.0
1	1					16	sim1	694405	13	sim1	12	IS30_IS30	694405	695625.0	NC_000913.3_art_ISs	693904.0	694404.0		695626.0	696126.0	NC_000913.3	675589.0				676590.0	IS only present in query Strain.	1. DLIS	Complete IS hit.	-	Intergenic/Pseudo/Repeaed Region	-	Intergenic/Pseudo/Repeaed Region	b0644	Sel1 repeat-containing protein YbeQ	-	Intergenic/Pseudo/Repeaed Region	4763752.0
1	1					17	sim1	702884	14	sim1	13	IS30_IS30	702884	704104.0	NC_000913.3_art_ISs	702383.0	702883.0		704105.0	704605.0	NC_000913.3	682847.0				683848.0	IS only present in query Strain.	1. DLIS	Complete IS hit.	-	Intergenic/Pseudo/Repeaed Region	b0651	pyrimidine-specific ribonucleoside hydrolase RihA	b0650	chaperone protein HscC	b0651	pyrimidine-specific ribonucleoside hydrolase RihA	4763752.0
1	1					18	sim1	740643	15	sim1	14	IS30_IS30	740643	741863.0	NC_000913.3_art_ISs	740142.0	740642.0		741864.0	742364.0	NC_000913.3	719385.0				720386.0	IS only present in query Strain.	1. DLIS	Complete IS hit.	-	Intergenic/Pseudo/Repeaed Region	-	Intergenic/Pseudo/Repeaed Region	b0693	ornithine decarboxylase; degradative	b0693	ornithine decarboxylase; degradative	4763752.0
1	1					19	sim1	763460	16	sim1	15	IS30_IS30	763460	764680.0	NC_000913.3_art_ISs	762959.0	763459.0		764681.0	765181.0	NC_000913.3	740981.0				741982.0	IS only present in query Strain.	1. DLIS	Complete IS hit.	-	Intergenic/Pseudo/Repeaed Region	-	Intergenic/Pseudo/Repeaed Region	-	Intergenic/Pseudo/Repeaed Region	b0709	dipeptide:H(+) symporter DtpD	4763752.0
1	1					20	sim1	1073554	17	sim1	16	IS30_IS30	1073554	1074774.0	NC_000913.3_art_ISs	1073053.0	1073553.0		1074775.0	1075275.0	NC_000913.3	1049854.0				1050855.0	IS only present in query Strain.	1. DLIS	Complete IS hit.	b4516	IS1 protein InsA	-	Intergenic/Pseudo/Repeaed Region	b4516	IS1 protein InsA	-	Intergenic/Pseudo/Repeaed Region	4763752.0
1	1					21	sim1	1109372	18	sim1	17	IS30_IS30	1109372	1110592.0	NC_000913.3_art_ISs	1108871.0	1109371.0		1110593.0	1111093.0	NC_000913.3	1084451.0				1085452.0	IS only present in query Strain.	1. DLIS	Complete IS hit.	b1019	heme-containing peroxidase/deferrochelatase	b1020	ATP-binding protein PhoH	b1019	heme-containing peroxidase/deferrochelatase	b1020	ATP-binding protein PhoH	4763752.0
1	1					22	sim1	1162082	19	sim1	18	IS30_IS30	1162082	1163302.0	NC_000913.3_art_ISs	1161581.0	1162081.0		1163303.0	1163803.0	NC_000913.3	1135940.0				1136941.0	IS only present in query Strain.	1. DLIS	Complete IS hit.	b1079	flagellar L-ring protein	-	Intergenic/Pseudo/Repeaed Region	b1079	flagellar L-ring protein	b1080	flagellar P-ring protein	4763752.0
1	1					23	sim1	1201747	20	sim1	19	IS30_IS30	1201747	1202967.0	NC_000913.3_art_ISs	1201246.0	1201746.0		1202968.0	1203468.0	NC_000913.3	1174384.0				1175385.0	IS only present in query Strain.	1. DLIS	Complete IS hit.	-	Intergenic/Pseudo/Repeaed Region	-	Intergenic/Pseudo/Repeaed Region	b1115	inner membrane protein YcfT	-	Intergenic/Pseudo/Repeaed Region	4763752.0
1	1					24	sim1	1211618	21	sim1	20	IS30_IS30	1211618	1212838.0	NC_000913.3_art_ISs	1211117.0	1211617.0		1212839.0	1213339.0	NC_000913.3	1183034.0				1184035.0	IS only present in query Strain.	1. DLIS	Complete IS hit.	-	Intergenic/Pseudo/Repeaed Region	b1125	spermidine preferential ABC transporter membrane subunit PotB	b1124	spermidine preferential ABC transporter membrane subunit PotC	b1125	spermidine preferential ABC transporter membrane subunit PotB	4763752.0
1	1					25	sim1	1262519	22	sim1	21	IS30_IS30	1262519	1263739.0	NC_000913.3_art_ISs	1262018.0	1262518.0		1263740.0	1264240.0	NC_000913.3	1232714.0				1233715.0	IS only present in query Strain.	1. DLIS	Complete IS hit.	b1185	protein thiol:quinone oxidoreductase DsbB	-	Intergenic/Pseudo/Repeaed Region	b1185	protein thiol:quinone oxidoreductase DsbB	b1186	Na(+):H(+) antiporter NhaB	4763752.0
1	1					26	sim1	1379184	23	sim1	22	IS30_IS30	1379184	1380404.0	NC_000913.3_art_ISs	1378683.0	1379183.0		1380405.0	1380905.0	NC_000913.3	1348158.0				1349159.0	IS only present in query Strain.	1. DLIS	Complete IS hit.	-	Intergenic/Pseudo/Repeaed Region	b1287	putative oxidoreductase	b1286	RNase II	b1287	putative oxidoreductase	4763752.0
1	1					27	sim1	1422406	24	sim1	23	IS30_IS30	1422406	1423626.0	NC_000913.3_art_ISs	1421905.0	1422405.0		1423627.0	1424127.0	NC_000913.3	1390159.0				1391160.0	IS only present in query Strain.	1. DLIS	Complete IS hit.	b1326	murein tripeptide amidase A	b1327	putative hydrolase YcjY	b1326	murein tripeptide amidase A	b1327	putative hydrolase YcjY	4763752.0
1	1					28	sim1	1442225	25	sim1	24	IS30_IS30	1442225	1443445.0	NC_000913.3_art_ISs	1441724.0	1442224.0		1443446.0	1443946.0	NC_000913.3	1408757.0				1409758.0	IS only present in query Strain.	1. DLIS	Complete IS hit.	b1342	Zn(2(+)):H(+) symporter	b1343	ATP-dependent RNA helicase DbpA	b1342	Zn(2(+)):H(+) symporter	b1343	ATP-dependent RNA helicase DbpA	4763752.0
1	1					29	sim1	1460624	26	sim1	25	IS30_IS30	1460624	1461844.0	NC_000913.3_art_ISs	1460123.0	1460623.0		1461845.0	1462345.0	NC_000913.3	1425935.0				1426936.0	IS only present in query Strain.	1. DLIS	Complete IS hit.	b1366	Rac prophage; putative uncharacterized protein YdaY	b1368	Rac prophage; putative prophage tail length tape measure domain-containing protein YnaA	b1366	Rac prophage; putative uncharacterized protein YdaY	b1368	Rac prophage; putative prophage tail length tape measure domain-containing protein YnaA	4763752.0
1	1					30	sim1	1466866	27	sim1	26	IS30_IS30	1466866	1468086.0	NC_000913.3_art_ISs	1466365.0	1466865.0		1468087.0	1468587.0	NC_000913.3	1430956.0				1431957.0	IS only present in query Strain.	1. DLIS	Complete IS hit.	-	Intergenic/Pseudo/Repeaed Region	-	Intergenic/Pseudo/Repeaed Region	b1372	Rac prophage; putative membrane protein	b1372	Rac prophage; putative membrane protein	4763752.0
1	1					31	sim1	1479386	28	sim1	27	IS30_IS30	1479386	1480606.0	NC_000913.3_art_ISs	1478885.0	1479385.0		1480607.0	1481107.0	NC_000913.3	1442255.0				1443256.0	IS only present in query Strain.	1. DLIS	Complete IS hit.	-	Intergenic/Pseudo/Repeaed Region	b1381	PF11739 family protein YdbH	b1380	D-lactate dehydrogenase	b1381	PF11739 family protein YdbH	4763752.0
1	1					32	sim1	1604894	29	sim1	28	IS30_IS30	1604894	1606114.0	NC_000913.3_art_ISs	1604393.0	1604893.0		1606115.0	1606615.0	NC_000913.3	1566542.0				1567543.0	IS only present in query Strain.	1. DLIS	Complete IS hit.	-	Intergenic/Pseudo/Repeaed Region	b1491	putative lipoprotein YddW	b1490	diguanylate cyclase DosC	b1491	putative lipoprotein YddW	4763752.0
1	1					33	sim1	1617060	30	sim1	29	IS30_IS30	1617060	1618280.0	NC_000913.3_art_ISs	1616559.0	1617059.0		1618281.0	1618781.0	NC_000913.3	1577487.0				1578488.0	IS only present in query Strain.	1. DLIS	Complete IS hit.	b1495	putative TonB-dependent receptor	-	Intergenic/Pseudo/Repeaed Region	b1495	putative TonB-dependent receptor	b1496	ABC transporter family protein YddA	4763752.0
1	1					34	sim1	1626616	31	sim1	30	IS30_IS30	1626616	1627836.0	NC_000913.3_art_ISs	1626115.0	1626615.0		1627837.0	1628337.0	NC_000913.3	1585822.0				1586823.0	IS only present in query Strain.	1. DLIS	Complete IS hit.	-	Intergenic/Pseudo/Repeaed Region	b1502	putative fimbrial adhesin protein YdeQ	b1501	putative oxidoreductase YdeP	b1502	putative fimbrial adhesin protein YdeQ	4763752.0
1	1					35	sim1	1648070	32	sim1	31	IS30_IS30	1648070	1649290.0	NC_000913.3_art_ISs	1647569.0	1648069.0		1649291.0	1649791.0	NC_000913.3	1606055.0				1607056.0	IS only present in query Strain.	1. DLIS	Complete IS hit.	b1516	Autoinducer-2 ABC transporter periplasmic binding protein	b1518	(4S)-4-hydroxy-5-phosphonooxypentane-2;3-dione isomerase	b1516	Autoinducer-2 ABC transporter periplasmic binding protein	b1518	(4S)-4-hydroxy-5-phosphonooxypentane-2;3-dione isomerase	4763752.0
1	1					36	sim1	1658419	33	sim1	32	IS30_IS30	1658419	1659639.0	NC_000913.3_art_ISs	1657918.0	1658418.0		1659640.0	1660140.0	NC_000913.3	1615183.0				1616184.0	IS only present in query Strain.	1. DLIS	Complete IS hit.	-	Intergenic/Pseudo/Repeaed Region	b1527	protein YneK	b1526	putative LysR-type DNA-binding transcriptional regulator YneJ	b1527	protein YneK	4763752.0
1	1					39	sim1	1780648	34	sim1	33	IS30_IS30	1780648	1781868.0	NC_000913.3_art_ISs	1780147.0	1780647.0		1781869.0	1782369.0	NC_000913.3	1733749.0				1734750.0	IS only present in query Strain.	1. DLIS	Complete IS hit.	-	Intergenic/Pseudo/Repeaed Region	b1655	peptidoglycan DD-endopeptidase MepH	-	Intergenic/Pseudo/Repeaed Region	b1655	peptidoglycan DD-endopeptidase MepH	4763752.0
1	1					40	sim1	1798464	35	sim1	34	IS30_IS30	1798464	1799684.0	NC_000913.3_art_ISs	1797963.0	1798463.0		1799685.0	1800185.0	NC_000913.3	1750344.0				1751345.0	IS only present in query Strain.	1. DLIS	Complete IS hit.	b1670	putative cytochrome YdhU	b1672	protein YdhW	b1670	putative cytochrome YdhU	b1672	protein YdhW	4763752.0
1	1					41	sim1	1853479	36	sim1	35	IS30_IS30	1853479	1854699.0	NC_000913.3_art_ISs	1852978.0	1853478.0		1854700.0	1855200.0	NC_000913.3	1804138.0				1805139.0	IS only present in query Strain.	1. DLIS	Complete IS hit.	-	Intergenic/Pseudo/Repeaed Region	-	Intergenic/Pseudo/Repeaed Region	b4494	putative ankyrin repeat protein B; N-terminal fragment	-	Intergenic/Pseudo/Repeaed Region	4763752.0
1	1					42	sim1	1890504	37	sim1	36	IS30_IS30	1890504	1891724.0	NC_000913.3_art_ISs	1890003.0	1890503.0		1891725.0	1892225.0	NC_000913.3	1839942.0				1840943.0	IS only present in query Strain.	1. DLIS	Complete IS hit.	-	Intergenic/Pseudo/Repeaed Region	b1758	putative phosphatidyl transferase; inner membrane protein	b1757	molybdopterin synthase sulfurtransferase	b1758	putative phosphatidyl transferase; inner membrane protein	4763752.0
1	1					43	sim1	1934972	38	sim1	37	IS30_IS30	1934972	1936192.0	NC_000913.3_art_ISs	1934471.0	1934971.0		1936193.0	1936693.0	NC_000913.3	1883189.0				1884190.0	IS only present in query Strain.	1. DLIS	Complete IS hit.	-	Intergenic/Pseudo/Repeaed Region	-	Intergenic/Pseudo/Repeaed Region	b1801	putative transporter YeaV	b1801	putative transporter YeaV	4763752.0
1	1					44	sim1	1943605	39	sim1	38	IS30_IS30	1943605	1944825.0	NC_000913.3_art_ISs	1943104.0	1943604.0		1944826.0	1945326.0	NC_000913.3	1890601.0				1891602.0	IS only present in query Strain.	1. DLIS	Complete IS hit.	-	Intergenic/Pseudo/Repeaed Region	b1808	putative 5' to 3' DNA helicase implicated in DNA repair	b1807	N(6)-L-threonylcarbamoyladenine synthase; TsaB subunit	b1808	putative 5' to 3' DNA helicase implicated in DNA repair	4763752.0
1	1					45	sim1	2023507	40	sim1	39	IS30_IS30	2023507	2024727.0	NC_000913.3_art_ISs	2023006.0	2023506.0		2024728.0	2025228.0	NC_000913.3	1969282.0				1970283.0	IS only present in query Strain.	1. DLIS	Complete IS hit.	b1884	chemotaxis protein methyltransferase	-	Intergenic/Pseudo/Repeaed Region	b1884	chemotaxis protein methyltransferase	b1885	methyl-accepting chemotaxis protein Tap	4763752.0
1	1					46	sim1	2075131	41	sim1	40	IS30_IS30	2075131	2076351.0	NC_000913.3_art_ISs	2074630.0	2075130.0		2076352.0	2076852.0	NC_000913.3	2019685.0				2020686.0	IS only present in query Strain.	1. DLIS	Complete IS hit.	b1944	flagellar protein FliL	-	Intergenic/Pseudo/Repeaed Region	b1944	flagellar protein FliL	b1945	flagellar motor switch protein FliM	4763752.0
1	1					47	sim1	2104936	42	sim1	41	IS30_IS30	2104936	2106156.0	NC_000913.3_art_ISs	2104435.0	2104935.0		2106157.0	2106657.0	NC_000913.3	2048269.0				2049270.0	IS only present in query Strain.	1. DLIS	Complete IS hit.	-	Intergenic/Pseudo/Repeaed Region	-	Intergenic/Pseudo/Repeaed Region	b1978	inverse autotransporter adhesin	b1978	inverse autotransporter adhesin	4763752.0
1	1					48	sim1	2167656	43	sim1	42	IS30_IS30	2167656	2168876.0	NC_000913.3_art_ISs	2167155.0	2167655.0		2168877.0	2169377.0	NC_000913.3	2109768.0				2110769.0	IS only present in query Strain.	1. DLIS	Complete IS hit.	b2038	dTDP-4-dehydrorhamnose 3;5-epimerase	-	Intergenic/Pseudo/Repeaed Region	b2038	dTDP-4-dehydrorhamnose 3;5-epimerase	b2039	dTDP-glucose pyrophosphorylase	4763752.0
1	1					49	sim1	2178611	44	sim1	43	IS30_IS30	2178611	2179831.0	NC_000913.3_art_ISs	2178110.0	2178610.0		2179832.0	2180332.0	NC_000913.3	2119502.0				2120503.0	IS only present in query Strain.	1. DLIS	Complete IS hit.	-	Intergenic/Pseudo/Repeaed Region	b2047	undecaprenyl-phosphate glucose phosphotransferase	b2046	M-antigen undecaprenyl disphosphate flippase	b2047	undecaprenyl-phosphate glucose phosphotransferase	4763752.0
1	1					50	sim1	2231150	45	sim1	44	IS30_IS30	2231150	2232370.0	NC_000913.3_art_ISs	2230649.0	2231149.0		2232371.0	2232871.0	NC_000913.3	2170820.0				2171821.0	IS only present in query Strain.	1. DLIS	Complete IS hit.	-	Intergenic/Pseudo/Repeaed Region	-	Intergenic/Pseudo/Repeaed Region	b2089	IS3 element protein InsF	-	Intergenic/Pseudo/Repeaed Region	4763752.0
1	1					51	sim1	2254416	46	sim1	45	IS30_IS30	2254416	2255636.0	NC_000913.3_art_ISs	2253915.0	2254415.0		2255637.0	2256137.0	NC_000913.3	2192865.0				2193866.0	IS only present in query Strain.	1. DLIS	Complete IS hit.	-	Intergenic/Pseudo/Repeaed Region	-	Intergenic/Pseudo/Repeaed Region	-	Intergenic/Pseudo/Repeaed Region	b2113	P-loop NTPase family protein	4763752.0
1	1					52	sim1	2258792	47	sim1	46	IS30_IS30	2258792	2260012.0	NC_000913.3_art_ISs	2258291.0	2258791.0		2260013.0	2260513.0	NC_000913.3	2196020.0				2197021.0	IS only present in query Strain.	1. DLIS	Complete IS hit.	b2114	methionine--tRNA ligase	-	Intergenic/Pseudo/Repeaed Region	b2114	methionine--tRNA ligase	b2115	putative protein YehF	4763752.0
1	1					53	sim1	2323694	48	sim1	47	IS30_IS30	2323694	2324914.0	NC_000913.3_art_ISs	2323193.0	2323693.0		2324915.0	2325415.0	NC_000913.3	2259701.0				2260702.0	IS only present in query Strain.	1. DLIS	Complete IS hit.	-	Intergenic/Pseudo/Repeaed Region	-	Intergenic/Pseudo/Repeaed Region	-	Intergenic/Pseudo/Repeaed Region	b2167	fructose-specific PTS multiphosphoryl transfer protein FruA	4763752.0
1	1					54	sim1	2410789	49	sim1	48	IS30_IS30	2410789	2412009.0	NC_000913.3_art_ISs	2410288.0	2410788.0		2412010.0	2412510.0	NC_000913.3	2345575.0				2346576.0	IS only present in query Strain.	1. DLIS	Complete IS hit.	-	Intergenic/Pseudo/Repeaed Region	-	Intergenic/Pseudo/Repeaed Region	b2234	ribonucleoside-diphosphate reductase 1 subunit alpha	b2234	ribonucleoside-diphosphate reductase 1 subunit alpha	4763752.0
1	1					55	sim1	2444143	50	sim1	49	IS30_IS30	2444143	2445363.0	NC_000913.3_art_ISs	2443642.0	2444142.0		2445364.0	2445864.0	NC_000913.3	2377708.0				2378709.0	IS only present in query Strain.	1. DLIS	Complete IS hit.	-	Intergenic/Pseudo/Repeaed Region	-	Intergenic/Pseudo/Repeaed Region	b2264	2-succinyl-5-enolpyruvyl-6-hydroxy-3- cyclohexene-1-carboxylate synthase	b2264	2-succinyl-5-enolpyruvyl-6-hydroxy-3- cyclohexene-1-carboxylate synthase	4763752.0
1	1					56	sim1	2449745	51	sim1	50	IS30_IS30	2449745	2450965.0	NC_000913.3_art_ISs	2449244.0	2449744.0		2450966.0	2451466.0	NC_000913.3	2382089.0				2383090.0	IS only present in query Strain.	1. DLIS	Complete IS hit.	b2268	ribonuclease BN	b2269	protease ElaD	b2268	ribonuclease BN	b2269	protease ElaD	4763752.0
1	1					57	sim1	2565675	52	sim1	51	IS30_IS30	2565675	2566895.0	NC_000913.3_art_ISs	2565174.0	2565674.0		2566896.0	2567396.0	NC_000913.3	2496798.0				2497799.0	IS only present in query Strain.	1. DLIS	Complete IS hit.	-	Intergenic/Pseudo/Repeaed Region	-	Intergenic/Pseudo/Repeaed Region	-	Intergenic/Pseudo/Repeaed Region	b2379	glutamate--pyruvate aminotransferase AlaC	4763752.0
1	1					58	sim1	2742000	53	sim1	52	IS30_IS30	2742000	2743220.0	NC_000913.3_art_ISs	2741499.0	2741999.0		2743221.0	2743721.0	NC_000913.3	2671902.0				2672903.0	IS only present in query Strain.	1. DLIS	Complete IS hit.	b2541	2;3-dihydroxy-2;3-dihydrophenylpropionate dehydrogenase	-	Intergenic/Pseudo/Repeaed Region	b2541	2;3-dihydroxy-2;3-dihydrophenylpropionate dehydrogenase	b2542	putative 3-phenylpropionate/cinnamate dioxygenase ferredoxin reductase subunit	4763752.0
1	1					59	sim1	2854403	54	sim1	53	IS30_IS30	2854403	2855623.0	NC_000913.3_art_ISs	2853902.0	2854402.0		2855624.0	2856124.0	NC_000913.3	2783084.0				2784085.0	IS only present in query Strain.	1. DLIS	Complete IS hit.	b2648	putative invertase fragment	b2649	DUF5508 domain-containing protein YpjB	b2648	putative invertase fragment	b2649	DUF5508 domain-containing protein YpjB	4763752.0
1	1					60	sim1	2875762	55	sim1	54	IS30_IS30	2875762	2876982.0	NC_000913.3_art_ISs	2875261.0	2875761.0		2876983.0	2877483.0	NC_000913.3	2803222.0				2804223.0	IS only present in query Strain.	1. DLIS	Complete IS hit.	b2675	ribonucleoside-diphosphate reductase 2 subunit alpha	-	Intergenic/Pseudo/Repeaed Region	b2675	ribonucleoside-diphosphate reductase 2 subunit alpha	b2676	ribonucleoside-diphosphate reductase 2 subunit beta	4763752.0
1	1					61	sim1	2893718	56	sim1	55	IS30_IS30	2893718	2894938.0	NC_000913.3_art_ISs	2893217.0	2893717.0		2894939.0	2895439.0	NC_000913.3	2819957.0				2820958.0	IS only present in query Strain.	1. DLIS	Complete IS hit.	-	Intergenic/Pseudo/Repeaed Region	-	Intergenic/Pseudo/Repeaed Region	b2697	alanine--tRNA ligase/DNA-binding transcriptional repressor	b2697	alanine--tRNA ligase/DNA-binding transcriptional repressor	4763752.0
1	1					62	sim1	2944650	57	sim1	56	IS30_IS30	2944650	2945870.0	NC_000913.3_art_ISs	2944149.0	2944649.0		2945871.0	2946371.0	NC_000913.3	2869668.0				2870669.0	IS only present in query Strain.	1. DLIS	Complete IS hit.	-	Intergenic/Pseudo/Repeaed Region	b2745	tRNA pseudouridine(13) synthase	b2744	broad specificity 5'(3')-nucleotidase and polyphosphatase	b2745	tRNA pseudouridine(13) synthase	4763752.0
1	1					63	sim1	3007937	58	sim1	57	IS30_IS30	3007937	3009157.0	NC_000913.3_art_ISs	3007436.0	3007936.0		3009158.0	3009658.0	NC_000913.3	2931734.0				2932735.0	IS only present in query Strain.	1. DLIS	Complete IS hit.	b2798	flap endonuclease	-	Intergenic/Pseudo/Repeaed Region	b2798	flap endonuclease	b2799	L-1;2-propanediol oxidoreductase	4763752.0
1	1					64	sim1	3069413	59	sim1	58	IS30_IS30	3069413	3070633.0	NC_000913.3_art_ISs	3068912.0	3069412.0		3070634.0	3071134.0	NC_000913.3	2991989.0				2992990.0	IS only present in query Strain.	1. DLIS	Complete IS hit.	-	Intergenic/Pseudo/Repeaed Region	-	Intergenic/Pseudo/Repeaed Region	-	Intergenic/Pseudo/Repeaed Region	b2852	putative transcriptional regulator YgeH	4763752.0
1	1					65	sim1	3245999	60	sim1	59	IS30_IS30	3245999	3247219.0	NC_000913.3_art_ISs	3245498.0	3245998.0		3247220.0	3247720.0	NC_000913.3	3167354.0				3168355.0	IS only present in query Strain.	1. DLIS	Complete IS hit.	b3020	putative deoxycholate binding periplasmic protein	b3022	mRNA interferase/toxin of the MqsR-MqsA toxin-antitoxin system	b3020	putative deoxycholate binding periplasmic protein	b3022	mRNA interferase/toxin of the MqsR-MqsA toxin-antitoxin system	4763752.0
1	1					66	sim1	3260495	61	sim1	60	IS30_IS30	3260495	3261715.0	NC_000913.3_art_ISs	3259994.0	3260494.0		3261716.0	3262216.0	NC_000913.3	3180629.0				3181630.0	IS only present in query Strain.	1. DLIS	Complete IS hit.	-	Intergenic/Pseudo/Repeaed Region	b3039	4;5-DOPA dioxygenase extradiol	b3038	putative enzyme with ATPase activity	b3039	4;5-DOPA dioxygenase extradiol	4763752.0
1	1					67	sim1	3275950	62	sim1	61	IS30_IS30	3275950	3277170.0	NC_000913.3_art_ISs	3275449.0	3275949.0		3277171.0	3277671.0	NC_000913.3	3194863.0				3195864.0	IS only present in query Strain.	1. DLIS	Complete IS hit.	-	Intergenic/Pseudo/Repeaed Region	-	Intergenic/Pseudo/Repeaed Region	-	Intergenic/Pseudo/Repeaed Region	b3052	fused heptose 7-phosphate kinase/heptose 1-phosphate adenyltransferase	4763752.0
1	1					68	sim1	3297068	63	sim1	62	IS30_IS30	3297068	3298288.0	NC_000913.3_art_ISs	3296567.0	3297067.0		3298289.0	3298789.0	NC_000913.3	3214760.0				3215761.0	IS only present in query Strain.	1. DLIS	Complete IS hit.	b3067	RNA polymerase; sigma 70 (sigma D) factor	b3070	NADPH-dependent ferric chelate reductase	b3067	RNA polymerase; sigma 70 (sigma D) factor	b3070	NADPH-dependent ferric chelate reductase	4763752.0
1	1					69	sim1	3344596	64	sim1	63	IS30_IS30	3344596	3345816.0	NC_000913.3_art_ISs	3344095.0	3344595.0		3345817.0	3346317.0	NC_000913.3	3261067.0				3262068.0	IS only present in query Strain.	1. DLIS	Complete IS hit.	-	Intergenic/Pseudo/Repeaed Region	-	Intergenic/Pseudo/Repeaed Region	b3114	2-ketobutyrate formate-lyase/pyruvate formate-lyase 4	b3114	2-ketobutyrate formate-lyase/pyruvate formate-lyase 4	4763752.0
1	1					70	sim1	3353954	65	sim1	64	IS30_IS30	3353954	3355174.0	NC_000913.3_art_ISs	3353453.0	3353953.0		3355175.0	3355675.0	NC_000913.3	3269204.0				3270205.0	IS only present in query Strain.	1. DLIS	Complete IS hit.	b3121	uncharacterized protein YhaC	-	Intergenic/Pseudo/Repeaed Region	b3121	uncharacterized protein YhaC	-	Intergenic/Pseudo/Repeaed Region	4763752.0
1	1					71	sim1	3356035	66	sim1	65	IS30_IS30	3356035	3357255.0	NC_000913.3_art_ISs	3355534.0	3356034.0		3357256.0	3357756.0	NC_000913.3	3270064.0				3271065.0	IS only present in query Strain.	1. DLIS	Complete IS hit.	-	Intergenic/Pseudo/Repeaed Region	b3124	glycerate 2-kinase 1	-	Intergenic/Pseudo/Repeaed Region	b3124	glycerate 2-kinase 1	4763752.0
1	1					72	sim1	3425882	67	sim1	66	IS30_IS30	3425882	3427102.0	NC_000913.3_art_ISs	3425381.0	3425881.0		3427103.0	3427603.0	NC_000913.3	3338690.0				3339691.0	IS only present in query Strain.	1. DLIS	Complete IS hit.	-	Intergenic/Pseudo/Repeaed Region	b3195	intermembrane phospholipid transport system; ATP binding subunit MlaF	b3194	intermembrane phospholipid transport system; integral membrane subunit MlaE	b3195	intermembrane phospholipid transport system; ATP binding subunit MlaF	4763752.0
1	1					73	sim1	3519281	68	sim1	67	IS30_IS30	3519281	3520501.0	NC_000913.3_art_ISs	3518780.0	3519280.0		3520502.0	3521002.0	NC_000913.3	3430868.0				3431869.0	IS only present in query Strain.	1. DLIS	Complete IS hit.	-	Intergenic/Pseudo/Repeaed Region	b3283	putative DNA topoisomerase	b3282	threonylcarbamoyl-AMP synthase	b3283	putative DNA topoisomerase	4763752.0
1	1					74	sim1	3541370	69	sim1	68	IS30_IS30	3541370	3542590.0	NC_000913.3_art_ISs	3540869.0	3541369.0		3542591.0	3543091.0	NC_000913.3	3451736.0				3452737.0	IS only present in query Strain.	1. DLIS	Complete IS hit.	-	Intergenic/Pseudo/Repeaed Region	b3320	50S ribosomal subunit protein L3	b3319	50S ribosomal subunit protein L4	b3320	50S ribosomal subunit protein L3	4763752.0
1	1					75	sim1	3593161	70	sim1	69	IS30_IS30	3593161	3594381.0	NC_000913.3_art_ISs	3592660.0	3593160.0		3594382.0	3594882.0	NC_000913.3	3502306.0				3503307.0	IS only present in query Strain.	1. DLIS	Complete IS hit.	-	Intergenic/Pseudo/Repeaed Region	b3374	fructoselysine 6-kinase	-	Intergenic/Pseudo/Repeaed Region	b3374	fructoselysine 6-kinase	4763752.0
1	1					76	sim1	3679224	71	sim1	70	IS30_IS30	3679224	3680444.0	NC_000913.3_art_ISs	3678723.0	3679223.0		3680445.0	3680945.0	NC_000913.3	3587148.0				3588149.0	IS only present in query Strain.	1. DLIS	Complete IS hit.	b3448	DUF2756 domain-containing protein YhhA	b3450	sn-glycerol 3-phosphate ABC transporter ATP binding subunit	b3448	DUF2756 domain-containing protein YhhA	b3450	sn-glycerol 3-phosphate ABC transporter ATP binding subunit	4763752.0
1	1					77	sim1	3739873	72	sim1	71	IS30_IS30	3739873	3741093.0	NC_000913.3_art_ISs	3739372.0	3739872.0		3741094.0	3741594.0	NC_000913.3	3646576.0				3647577.0	IS only present in query Strain.	1. DLIS	Complete IS hit.	-	Intergenic/Pseudo/Repeaed Region	-	Intergenic/Pseudo/Repeaed Region	b3500	glutathione reductase (NADPH)	b3500	glutathione reductase (NADPH)	4763752.0
1	1					78	sim1	3770628	73	sim1	72	IS30_IS30	3770628	3771848.0	NC_000913.3_art_ISs	3770127.0	3770627.0		3771849.0	3772349.0	NC_000913.3	3676110.0				3677111.0	IS only present in query Strain.	1. DLIS	Complete IS hit.	-	Intergenic/Pseudo/Repeaed Region	-	Intergenic/Pseudo/Repeaed Region	-	Intergenic/Pseudo/Repeaed Region	b3524	AsmA family protein YhjG	4763752.0
1	1					83	sim1	3901471	74	sim1	73	IS30_IS30	3901471	3902691.0	NC_000913.3_art_ISs	3900970.0	3901470.0		3902692.0	3903192.0	NC_000913.3	3800848.0				3801849.0	IS only present in query Strain.	1. DLIS	Complete IS hit.	b3625	lipopolysaccharide core heptose (II) kinase	-	Intergenic/Pseudo/Repeaed Region	b3625	lipopolysaccharide core heptose (II) kinase	b3626	UDP-glucose:(glucosyl)LPS alpha-1;2-glucosyltransferase	4763752.0
1	1					84	sim1	4003056	75	sim1	74	IS30_IS30	4003056	4004276.0	NC_000913.3_art_ISs	4002555.0	4003055.0		4004277.0	4004777.0	NC_000913.3	3901212.0				3902213.0	IS only present in query Strain.	1. DLIS	Complete IS hit.	-	Intergenic/Pseudo/Repeaed Region	-	Intergenic/Pseudo/Repeaed Region	b3720	carbohydrate-specific outer membrane porin; cryptic	b3720	carbohydrate-specific outer membrane porin; cryptic	4763752.0
1	1					85	sim1	4014898	76	sim1	75	IS30_IS30	4014898	4016118.0	NC_000913.3_art_ISs	4014397.0	4014897.0		4016119.0	4016619.0	NC_000913.3	3911833.0				3912834.0	IS only present in query Strain.	1. DLIS	Complete IS hit.	-	Intergenic/Pseudo/Repeaed Region	-	Intergenic/Pseudo/Repeaed Region	-	Intergenic/Pseudo/Repeaed Region	b3729	L-glutamine--D-fructose-6-phosphate aminotransferase	4763752.0
1	1					86	sim1	4028167	77	sim1	76	IS30_IS30	4028167	4029387.0	NC_000913.3_art_ISs	4027666.0	4028166.0		4029388.0	4029888.0	NC_000913.3	3923881.0				3924882.0	IS only present in query Strain.	1. DLIS	Complete IS hit.	-	Intergenic/Pseudo/Repeaed Region	-	Intergenic/Pseudo/Repeaed Region	b3741	5-carboxymethylaminomethyluridine-tRNA synthase subunit MnmG	b3741	5-carboxymethylaminomethyluridine-tRNA synthase subunit MnmG	4763752.0
1	1					87	sim1	4030219	78	sim1	77	IS30_IS30	4030219	4031439.0	NC_000913.3_art_ISs	4029718.0	4030218.0		4031440.0	4031940.0	NC_000913.3	3924712.0				3925713.0	IS only present in query Strain.	1. DLIS	Complete IS hit.	-	Intergenic/Pseudo/Repeaed Region	-	Intergenic/Pseudo/Repeaed Region	b3741	5-carboxymethylaminomethyluridine-tRNA synthase subunit MnmG	-	Intergenic/Pseudo/Repeaed Region	4763752.0
1	1					88	sim1	4049820	79	sim1	78	IS30_IS30	4049820	4051040.0	NC_000913.3_art_ISs	4049319.0	4049819.0		4051041.0	4051541.0	NC_000913.3	3943092.0				3944093.0	IS only present in query Strain.	1. DLIS	Complete IS hit.	-	Intergenic/Pseudo/Repeaed Region	-	Intergenic/Pseudo/Repeaed Region	-	Intergenic/Pseudo/Repeaed Region	-	Intergenic/Pseudo/Repeaed Region	4763752.0
1	1					89	sim1	4059037	80	sim1	79	IS30_IS30	4059037	4060257.0	NC_000913.3_art_ISs	4058536.0	4059036.0		4060258.0	4060758.0	NC_000913.3	3951088.0				3952089.0	IS only present in query Strain.	1. DLIS	Complete IS hit.	-	Intergenic/Pseudo/Repeaed Region	-	Intergenic/Pseudo/Repeaed Region	b4488	acetolactate synthase II subunit IlvG; N-terminal fragment (pseudogene)	b4488	acetolactate synthase II subunit IlvG; N-terminal fragment (pseudogene)	4763752.0
1	1					90	sim1	4065997	81	sim1	80	IS30_IS30	4065997	4067217.0	NC_000913.3_art_ISs	4065496.0	4065996.0		4067218.0	4067718.0	NC_000913.3	3956827.0				3957828.0	IS only present in query Strain.	1. DLIS	Complete IS hit.	b3772	threonine deaminase	-	Intergenic/Pseudo/Repeaed Region	b3772	threonine deaminase	-	Intergenic/Pseudo/Repeaed Region	4763752.0
1	1					91	sim1	4096784	82	sim1	81	IS30_IS30	4096784	4098004.0	NC_000913.3_art_ISs	4096283.0	4096783.0		4098005.0	4098505.0	NC_000913.3	3986393.0				3987394.0	IS only present in query Strain.	1. DLIS	Complete IS hit.	-	Intergenic/Pseudo/Repeaed Region	-	Intergenic/Pseudo/Repeaed Region	-	Intergenic/Pseudo/Repeaed Region	b3802	protein HemY	4763752.0
1	1					92	sim1	4158679	83	sim1	82	IS30_IS30	4158679	4159899.0	NC_000913.3_art_ISs	4158178.0	4158678.0		4159900.0	4160400.0	NC_000913.3	4047067.0				4048068.0	IS only present in query Strain.	1. DLIS	Complete IS hit.	-	Intergenic/Pseudo/Repeaed Region	-	Intergenic/Pseudo/Repeaed Region	b3863	DNA polymerase I	b3863	DNA polymerase I	4763752.0
1	1					93	sim1	4189125	84	sim1	83	IS30_IS30	4189125	4190345.0	NC_000913.3_art_ISs	4188624.0	4189124.0		4190346.0	4190846.0	NC_000913.3	4076292.0				4077293.0	IS only present in query Strain.	1. DLIS	Complete IS hit.	-	Intergenic/Pseudo/Repeaed Region	b3887	D-aminoacyl-tRNA deacylase	b3886	putative inner membrane protein	b3887	D-aminoacyl-tRNA deacylase	4763752.0
1	1					94	sim1	4196931	85	sim1	84	IS30_IS30	4196931	4198151.0	NC_000913.3_art_ISs	4196430.0	4196930.0		4198152.0	4198652.0	NC_000913.3	4082877.0				4083878.0	IS only present in query Strain.	1. DLIS	Complete IS hit.	-	Intergenic/Pseudo/Repeaed Region	-	Intergenic/Pseudo/Repeaed Region	b3894	formate dehydrogenase O subunit alpha	b3894	formate dehydrogenase O subunit alpha	4763752.0
1	1					95	sim1	4278846	86	sim1	85	IS30_IS30	4278846	4280066.0	NC_000913.3_art_ISs	4278345.0	4278845.0		4280067.0	4280567.0	NC_000913.3	4163571.0				4164572.0	IS only present in query Strain.	1. DLIS	Complete IS hit.	-	Intergenic/Pseudo/Repeaed Region	-	Intergenic/Pseudo/Repeaed Region	-	Intergenic/Pseudo/Repeaed Region	b3966	cobalamin/cobinamide outer membrane transporter	4763752.0
1	1					96	sim1	4288542	87	sim1	86	IS30_IS30	4288542	4289762.0	NC_000913.3_art_ISs	4288041.0	4288541.0		4289763.0	4290263.0	NC_000913.3	4172046.0				4173047.0	IS only present in query Strain.	1. DLIS	Complete IS hit.	-	Intergenic/Pseudo/Repeaed Region	-	Intergenic/Pseudo/Repeaed Region	-	Intergenic/Pseudo/Repeaed Region	b3972	UDP-N-acetylenolpyruvoylglucosamine reductase	4763752.0
1	1					97	sim1	4302160	88	sim1	87	IS30_IS30	4302160	4303380.0	NC_000913.3_art_ISs	4301659.0	4302159.0		4303381.0	4303881.0	NC_000913.3	4184443.0				4185444.0	IS only present in query Strain.	1. DLIS	Complete IS hit.	-	Intergenic/Pseudo/Repeaed Region	b3988	RNA polymerase subunit beta'	b3987	RNA polymerase subunit beta	b3988	RNA polymerase subunit beta'	4763752.0
1	1					98	sim1	4464175	89	sim1	88	IS30_IS30	4464175	4465395.0	NC_000913.3_art_ISs	4463674.0	4464174.0		4465396.0	4465896.0	NC_000913.3	4345237.0				4346238.0	IS only present in query Strain.	1. DLIS	Complete IS hit.	b4121	conserved inner membrane protein YjdF	-	Intergenic/Pseudo/Repeaed Region	b4121	conserved inner membrane protein YjdF	b4122	fumarase B	4763752.0
1	1					99	sim1	4542458	90	sim1	89	IS30_IS30	4542458	4543678.0	NC_000913.3_art_ISs	4541957.0	4542457.0		4543679.0	4544179.0	NC_000913.3	4422299.0				4423300.0	IS only present in query Strain.	1. DLIS	Complete IS hit.	-	Intergenic/Pseudo/Repeaed Region	b4197	L-ribulose-5-phosphate 3-epimerase UlaE	b4196	3-keto-L-gulonate-6-phosphate decarboxylase UlaD	b4197	L-ribulose-5-phosphate 3-epimerase UlaE	4763752.0
1	1					100	sim1	4632977	91	sim1	90	IS30_IS30	4632977	4634197.0	NC_000913.3_art_ISs	4632476.0	4632976.0		4634198.0	4634698.0	NC_000913.3	4511597.0				4512598.0	IS only present in query Strain.	1. DLIS	Complete IS hit.	-	Intergenic/Pseudo/Repeaed Region	b4289	ferric citrate ABC transporter membrane subunit FecC	b4288	ferric citrate ABC transporter membrane subunit FecD	b4289	ferric citrate ABC transporter membrane subunit FecC	4763752.0
1	1					101	sim2	24841	107	sim2	0	IS30_IS30	24841	26061.0	NC_000913.3_art_ISs	24340.0	24840.0		26062.0	26562.0	NC_000913.3	24340.0				25341.0	IS only present in query Strain.	1. DLIS	Complete IS hit.	-	Intergenic/Pseudo/Repeaed Region	b0027	lipoprotein signal peptidase	b0026	isoleucine--tRNA ligase	b0027	lipoprotein signal peptidase	4763752.0
1	1					102	sim2	44068	108	sim2	1	IS30_IS30	44068	45288.0	NC_000913.3_art_ISs	43567.0	44067.0		45289.0	45789.0	NC_000913.3	42346.0				43347.0	IS only present in query Strain.	1. DLIS	Complete IS hit.	-	Intergenic/Pseudo/Repeaed Region	b0042	putative electron transfer flavoprotein FixB	-	Intergenic/Pseudo/Repeaed Region	b0042	putative electron transfer flavoprotein FixB	4763752.0
1	1					103	sim2	132117	109	sim2	2	IS30_IS30	132117	133337.0	NC_000913.3_art_ISs	131616.0	132116.0		133338.0	133838.0	NC_000913.3	129174.0				130175.0	IS only present in query Strain.	1. DLIS	Complete IS hit.	b0116	lipoamide dehydrogenase	-	Intergenic/Pseudo/Repeaed Region	b0116	lipoamide dehydrogenase	b0117	DUF3300 domain-containing protein YacH	4763752.0
1	1					104	sim2	307869	110	sim2	3	IS30_IS30	307869	309089.0	NC_000913.3_art_ISs	307368.0	307868.0		309090.0	309590.0	NC_000913.3	303705.0				304706.0	IS only present in query Strain.	1. DLIS	Complete IS hit.	-	Intergenic/Pseudo/Repeaed Region	b0289	putative fimbrial chaperone EcpE	-	Intergenic/Pseudo/Repeaed Region	b0289	putative fimbrial chaperone EcpE	4763752.0
1	1					105	sim2	332708	111	sim2	4	IS30_IS30	332708	333928.0	NC_000913.3_art_ISs	332207.0	332707.0		333929.0	334429.0	NC_000913.3	327323.0				328324.0	IS only present in query Strain.	1. DLIS	Complete IS hit.	-	Intergenic/Pseudo/Repeaed Region	-	Intergenic/Pseudo/Repeaed Region	b0312	betaine aldehyde dehydrogenase	b0312	betaine aldehyde dehydrogenase	4763752.0
1	1					106	sim2	356245	112	sim2	5	IS30_IS30	356245	357465.0	NC_000913.3_art_ISs	355744.0	356244.0		357466.0	357966.0	NC_000913.3	349639.0				350640.0	IS only present in query Strain.	1. DLIS	Complete IS hit.	-	Intergenic/Pseudo/Repeaed Region	-	Intergenic/Pseudo/Repeaed Region	-	Intergenic/Pseudo/Repeaed Region	b0333	2-methylcitrate synthase	4763752.0
1	1					107	sim2	398655	113	sim2	6	IS30_IS30	398655	399875.0	NC_000913.3_art_ISs	398154.0	398654.0		399876.0	400376.0	NC_000913.3	390828.0				391829.0	IS only present in query Strain.	1. DLIS	Complete IS hit.	-	Intergenic/Pseudo/Repeaed Region	b0372	IS3 element protein InsF	b4580	putative autotransporter YaiT	b0372	IS3 element protein InsF	4763752.0
1	1					108	sim2	409563	114	sim2	7	IS30_IS30	409563	410783.0	NC_000913.3_art_ISs	409062.0	409562.0		410784.0	411284.0	NC_000913.3	400515.0				401516.0	IS only present in query Strain.	1. DLIS	Complete IS hit.	b0381	D-alanine--D-alanine ligase A	b0382	anti-adaptor protein for sigma(S) stabilization	b0381	D-alanine--D-alanine ligase A	b0382	anti-adaptor protein for sigma(S) stabilization	4763752.0
1	1					109	sim2	437142	115	sim2	8	IS30_IS30	437142	438362.0	NC_000913.3_art_ISs	436641.0	437141.0		438363.0	438863.0	NC_000913.3	426873.0				427874.0	IS only present in query Strain.	1. DLIS	Complete IS hit.	b0406	tRNA-guanine transglycosylase	b0408	Sec translocon accessory complex subunit SecD	b0406	tRNA-guanine transglycosylase	b0408	Sec translocon accessory complex subunit SecD	4763752.0
1	1					110	sim2	597599	116	sim2	9	IS30_IS30	597599	598819.0	NC_000913.3_art_ISs	597098.0	597598.0		598820.0	599320.0	NC_000913.3	586109.0				587110.0	IS only present in query Strain.	1. DLIS	Complete IS hit.	-	Intergenic/Pseudo/Repeaed Region	b0567	DUF4434 domain-containing protein YbcH	-	Intergenic/Pseudo/Repeaed Region	b0567	DUF4434 domain-containing protein YbcH	4763752.0
1	1					111	sim2	608814	117	sim2	10	IS30_IS30	608814	610034.0	NC_000913.3_art_ISs	608313.0	608813.0		610035.0	610535.0	NC_000913.3	596103.0				597104.0	IS only present in query Strain.	1. DLIS	Complete IS hit.	-	Intergenic/Pseudo/Repeaed Region	-	Intergenic/Pseudo/Repeaed Region	b0572	copper/silver export system outer membrane channel	-	Intergenic/Pseudo/Repeaed Region	4763752.0
1	1					112	sim2	616630	118	sim2	11	IS30_IS30	616630	617850.0	NC_000913.3_art_ISs	616129.0	616629.0		617851.0	618351.0	NC_000913.3	602698.0				603699.0	IS only present in query Strain.	1. DLIS	Complete IS hit.	-	Intergenic/Pseudo/Repeaed Region	b0577	miniconductance mechanosensitive channel YbdG	b0576	phenylalanine:H(+) symporter PheP	b0577	miniconductance mechanosensitive channel YbdG	4763752.0
1	1					113	sim2	627397	119	sim2	12	IS30_IS30	627397	628617.0	NC_000913.3_art_ISs	626896.0	627396.0		628618.0	629118.0	NC_000913.3	612244.0				613245.0	IS only present in query Strain.	1. DLIS	Complete IS hit.	b0584	ferric enterobactin outer membrane transporter	-	Intergenic/Pseudo/Repeaed Region	b0584	ferric enterobactin outer membrane transporter	b0585	enterochelin esterase	4763752.0
1	1					114	sim2	635772	120	sim2	13	IS30_IS30	635772	636992.0	NC_000913.3_art_ISs	635271.0	635771.0		636993.0	637493.0	NC_000913.3	619398.0				620399.0	IS only present in query Strain.	1. DLIS	Complete IS hit.	-	Intergenic/Pseudo/Repeaed Region	b0589	ferric enterobactin ABC transporter membrane subunit FepG	b0588	ferric enterobactin ABC transporter ATP binding subunit	b0589	ferric enterobactin ABC transporter membrane subunit FepG	4763752.0
1	1					115	sim2	687577	121	sim2	14	IS30_IS30	687577	688797.0	NC_000913.3_art_ISs	687076.0	687576.0		688798.0	689298.0	NC_000913.3	669982.0				670983.0	IS only present in query Strain.	1. DLIS	Complete IS hit.	-	Intergenic/Pseudo/Repeaed Region	b0640	DNA polymerase III subunit delta	b0639	nicotinate-mononucleotide adenylyltransferase	b0640	DNA polymerase III subunit delta	4763752.0
1	1					116	sim2	808855	122	sim2	15	IS30_IS30	808855	810075.0	NC_000913.3_art_ISs	808354.0	808854.0		810076.0	810576.0	NC_000913.3	790039.0				791040.0	IS only present in query Strain.	1. DLIS	Complete IS hit.	-	Intergenic/Pseudo/Repeaed Region	b0759	UDP-glucose 4-epimerase	b0758	galactose-1-phosphate uridylyltransferase	b0759	UDP-glucose 4-epimerase	4763752.0
1	1					117	sim2	835866	123	sim2	16	IS30_IS30	835866	837086.0	NC_000913.3_art_ISs	835365.0	835865.0		837087.0	837587.0	NC_000913.3	815829.0				816830.0	IS only present in query Strain.	1. DLIS	Complete IS hit.	-	Intergenic/Pseudo/Repeaed Region	-	Intergenic/Pseudo/Repeaed Region	b0780	putative transferase YbhK	-	Intergenic/Pseudo/Repeaed Region	4763752.0
1	1					118	sim2	862047	124	sim2	17	IS30_IS30	862047	863267.0	NC_000913.3_art_ISs	861546.0	862046.0		863268.0	863768.0	NC_000913.3	840789.0				841790.0	IS only present in query Strain.	1. DLIS	Complete IS hit.	-	Intergenic/Pseudo/Repeaed Region	-	Intergenic/Pseudo/Repeaed Region	b0805	putative iron siderophore outer membrane transporter	-	Intergenic/Pseudo/Repeaed Region	4763752.0
1	1					119	sim2	869092	125	sim2	18	IS30_IS30	869092	870312.0	NC_000913.3_art_ISs	868591.0	869091.0		870313.0	870813.0	NC_000913.3	846613.0				847614.0	IS only present in query Strain.	1. DLIS	Complete IS hit.	-	Intergenic/Pseudo/Repeaed Region	b0811	L-glutamine ABC transporter periplasmic binding protein	b0810	L-glutamine ABC transporter membrane subunit	b0811	L-glutamine ABC transporter periplasmic binding protein	4763752.0
1	1					120	sim2	1029574	126	sim2	19	IS30_IS30	1029574	1030794.0	NC_000913.3_art_ISs	1029073.0	1029573.0		1030795.0	1031295.0	NC_000913.3	1005874.0				1006875.0	IS only present in query Strain.	1. DLIS	Complete IS hit.	-	Intergenic/Pseudo/Repeaed Region	b0947	6-N-hydroxylaminopurine resistance protein	-	Intergenic/Pseudo/Repeaed Region	b0947	6-N-hydroxylaminopurine resistance protein	4763752.0
1	1					121	sim2	1083997	127	sim2	20	IS30_IS30	1083997	1085217.0	NC_000913.3_art_ISs	1083496.0	1083996.0		1085218.0	1085718.0	NC_000913.3	1059076.0				1060077.0	IS only present in query Strain.	1. DLIS	Complete IS hit.	b0996	cytochrome c menaquinol dehydrogenase TorC	-	Intergenic/Pseudo/Repeaed Region	b0996	cytochrome c menaquinol dehydrogenase TorC	b0997	trimethylamine N-oxide reductase 1	4763752.0
1	1					122	sim2	1091862	128	sim2	21	IS30_IS30	1091862	1093082.0	NC_000913.3_art_ISs	1091361.0	1091861.0		1093083.0	1093583.0	NC_000913.3	1065720.0				1066721.0	IS only present in query Strain.	1. DLIS	Complete IS hit.	-	Intergenic/Pseudo/Repeaed Region	-	Intergenic/Pseudo/Repeaed Region	b1002	glucose-1-phosphatase	b1002	glucose-1-phosphatase	4763752.0
1	1					123	sim2	1119315	129	sim2	22	IS30_IS30	1119315	1120535.0	NC_000913.3_art_ISs	1118814.0	1119314.0		1120536.0	1121036.0	NC_000913.3	1091952.0				1092953.0	IS only present in query Strain.	1. DLIS	Complete IS hit.	b1024	partially deacetylated poly-beta-1;6-N-acetyl-D-glucosamine outer membrane porin	-	Intergenic/Pseudo/Repeaed Region	b1024	partially deacetylated poly-beta-1;6-N-acetyl-D-glucosamine outer membrane porin	b1025	putative diguanylate cyclase DgcT	4763752.0
1	1					124	sim2	1122081	130	sim2	23	IS30_IS30	1122081	1123301.0	NC_000913.3_art_ISs	1121580.0	1122080.0		1123302.0	1123802.0	NC_000913.3	1093497.0				1094498.0	IS only present in query Strain.	1. DLIS	Complete IS hit.	-	Intergenic/Pseudo/Repeaed Region	b1026	IS3 element protein InsF	b1025	putative diguanylate cyclase DgcT	b1026	IS3 element protein InsF	4763752.0
1	1					125	sim2	1249180	131	sim2	24	IS30_IS30	1249180	1250400.0	NC_000913.3_art_ISs	1248679.0	1249179.0		1250401.0	1250901.0	NC_000913.3	1219375.0				1220376.0	IS only present in query Strain.	1. DLIS	Complete IS hit.	-	Intergenic/Pseudo/Repeaed Region	-	Intergenic/Pseudo/Repeaed Region	-	Intergenic/Pseudo/Repeaed Region	b4491	putative transporter component; N-terminal fragment	4763752.0
1	1					126	sim2	1289364	132	sim2	25	IS30_IS30	1289364	1290584.0	NC_000913.3_art_ISs	1288863.0	1289363.0		1290585.0	1291085.0	NC_000913.3	1258338.0				1259339.0	IS only present in query Strain.	1. DLIS	Complete IS hit.	b1204	peptidyl-tRNA hydrolase	b1206	aerobic C4-dicarboxylate transporter DauA	b1204	peptidyl-tRNA hydrolase	b1206	aerobic C4-dicarboxylate transporter DauA	4763752.0
1	1					127	sim2	1308127	133	sim2	26	IS30_IS30	1308127	1309347.0	NC_000913.3_art_ISs	1307626.0	1308126.0		1309348.0	1309848.0	NC_000913.3	1275880.0				1276881.0	IS only present in query Strain.	1. DLIS	Complete IS hit.	-	Intergenic/Pseudo/Repeaed Region	-	Intergenic/Pseudo/Repeaed Region	b1222	sensory histidine kinase NarX	b1222	sensory histidine kinase NarX	4763752.0
1	1					128	sim2	1445491	134	sim2	27	IS30_IS30	1445491	1446711.0	NC_000913.3_art_ISs	1444990.0	1445490.0		1446712.0	1447212.0	NC_000913.3	1412023.0				1413024.0	IS only present in query Strain.	1. DLIS	Complete IS hit.	-	Intergenic/Pseudo/Repeaed Region	-	Intergenic/Pseudo/Repeaed Region	b1345	Rac prophage; putative integrase	b1345	Rac prophage; putative integrase	4763752.0
1	1					129	sim2	1455930	135	sim2	28	IS30_IS30	1455930	1457150.0	NC_000913.3_art_ISs	1455429.0	1455929.0		1457151.0	1457651.0	NC_000913.3	1421241.0				1422242.0	IS only present in query Strain.	1. DLIS	Complete IS hit.	-	Intergenic/Pseudo/Repeaed Region	b1360	Rac prophage; putative ATP-binding protein YdaV	b1359	Rac prophage; DUF1376 domain-containing protein YdaU	b1360	Rac prophage; putative ATP-binding protein YdaV	4763752.0
1	1					130	sim2	1540716	136	sim2	29	IS30_IS30	1540716	1541936.0	NC_000913.3_art_ISs	1540215.0	1540715.0		1541937.0	1542437.0	NC_000913.3	1504806.0				1505807.0	IS only present in query Strain.	1. DLIS	Complete IS hit.	b1432	putative insertion element transposase InsQ	-	Intergenic/Pseudo/Repeaed Region	b1432	putative insertion element transposase InsQ	b1433	putative transport protein YdcO	4763752.0
1	1					131	sim2	1596010	137	sim2	30	IS30_IS30	1596010	1597230.0	NC_000913.3_art_ISs	1595509.0	1596009.0		1597231.0	1597731.0	NC_000913.3	1558879.0				1559880.0	IS only present in query Strain.	1. DLIS	Complete IS hit.	b1484	putative D;D-dipeptide ABC transporter ATP-binding subunit DdpD	-	Intergenic/Pseudo/Repeaed Region	b1484	putative D;D-dipeptide ABC transporter ATP-binding subunit DdpD	b1485	putative D;D-dipeptide ABC transporter membrane subunit DdpC	4763752.0
1	1					132	sim2	1606200	138	sim2	31	IS30_IS30	1606200	1607420.0	NC_000913.3_art_ISs	1605699.0	1606199.0		1607421.0	1607921.0	NC_000913.3	1567848.0				1568849.0	IS only present in query Strain.	1. DLIS	Complete IS hit.	-	Intergenic/Pseudo/Repeaed Region	-	Intergenic/Pseudo/Repeaed Region	b1491	putative lipoprotein YddW	-	Intergenic/Pseudo/Repeaed Region	4763752.0
1	1					133	sim2	1608116	139	sim2	32	IS30_IS30	1608116	1609336.0	NC_000913.3_art_ISs	1607615.0	1608115.0		1609337.0	1609837.0	NC_000913.3	1568543.0				1569544.0	IS only present in query Strain.	1. DLIS	Complete IS hit.	-	Intergenic/Pseudo/Repeaed Region	-	Intergenic/Pseudo/Repeaed Region	b1491	putative lipoprotein YddW	b1492	L-glutamate:4-aminobutyrate antiporter	4763752.0
1	1					134	sim2	1648241	140	sim2	33	IS30_IS30	1648241	1649461.0	NC_000913.3_art_ISs	1647740.0	1648240.0		1649462.0	1649962.0	NC_000913.3	1607447.0				1608448.0	IS only present in query Strain.	1. DLIS	Complete IS hit.	-	Intergenic/Pseudo/Repeaed Region	b1520	conserved inner membrane protein YneE	b1519	trans-aconitate 2-methyltransferase	b1520	conserved inner membrane protein YneE	4763752.0
1	1					135	sim2	1675098	141	sim2	34	IS30_IS30	1675098	1676318.0	NC_000913.3_art_ISs	1674597.0	1675097.0		1676319.0	1676819.0	NC_000913.3	1433212.0				1434213.0	IS only present in query Strain.	1. DLIS	Complete IS hit.	b1544	Qin prophage; cold shock protein YdfK	b1545	Qin prophage; putative site-specific recombinase	b1374	Rac prophage; putative site-specific recombinase	b1375	Rac prophage; uncharacterized protein YnaE	4763752.0
1	1					136	sim2	1693219	142	sim2	35	IS30_IS30	1693219	1694439.0	NC_000913.3_art_ISs	1692718.0	1693218.0		1694440.0	1694940.0	NC_000913.3	1649983.0				1650984.0	IS only present in query Strain.	1. DLIS	Complete IS hit.	b1576	Qin prophage; lysis protein	b1578	Qin prophage; putative transposase	b1576	Qin prophage; lysis protein	b1577	Qin prophage; protein YdfE	4763752.0
1	1					137	sim2	1700034	143	sim2	36	IS30_IS30	1700034	1701254.0	NC_000913.3_art_ISs	1699533.0	1700033.0		1701255.0	1701755.0	NC_000913.3	1655577.0				1656578.0	IS only present in query Strain.	1. DLIS	Complete IS hit.	b1582	conserved inner membrane protein YnfA	b1584	spermidine N-acetyltransferase	b1582	conserved inner membrane protein YnfA	b1584	spermidine N-acetyltransferase	4763752.0
1	1					138	sim2	1713308	144	sim2	37	IS30_IS30	1713308	1714528.0	NC_000913.3_art_ISs	1712807.0	1713307.0		1714529.0	1715029.0	NC_000913.3	1667630.0				1668631.0	IS only present in query Strain.	1. DLIS	Complete IS hit.	-	Intergenic/Pseudo/Repeaed Region	-	Intergenic/Pseudo/Repeaed Region	b1594	DNA-binding transcriptional repressor Mlc	-	Intergenic/Pseudo/Repeaed Region	4763752.0
1	1					139	sim2	1745003	145	sim2	38	IS30_IS30	1745003	1746223.0	NC_000913.3_art_ISs	1744502.0	1745002.0		1746224.0	1746724.0	NC_000913.3	1698104.0				1699105.0	IS only present in query Strain.	1. DLIS	Complete IS hit.	-	Intergenic/Pseudo/Repeaed Region	-	Intergenic/Pseudo/Repeaed Region	-	Intergenic/Pseudo/Repeaed Region	b1620	DNA-binding transcriptional repressor MalI	4763752.0
1	1					140	sim2	1864262	146	sim2	39	IS30_IS30	1864262	1865482.0	NC_000913.3_art_ISs	1863761.0	1864261.0		1865483.0	1865983.0	NC_000913.3	1816142.0				1817143.0	IS only present in query Strain.	1. DLIS	Complete IS hit.	-	Intergenic/Pseudo/Repeaed Region	-	Intergenic/Pseudo/Repeaed Region	-	Intergenic/Pseudo/Repeaed Region	-	Intergenic/Pseudo/Repeaed Region	4763752.0
1	1					141	sim2	1890548	147	sim2	40	IS30_IS30	1890548	1891768.0	NC_000913.3_art_ISs	1890047.0	1890547.0		1891769.0	1892269.0	NC_000913.3	1841207.0				1842208.0	IS only present in query Strain.	1. DLIS	Complete IS hit.	b1758	putative phosphatidyl transferase; inner membrane protein	-	Intergenic/Pseudo/Repeaed Region	b1758	putative phosphatidyl transferase; inner membrane protein	-	Intergenic/Pseudo/Repeaed Region	4763752.0
1	1					142	sim2	1936134	148	sim2	41	IS30_IS30	1936134	1937354.0	NC_000913.3_art_ISs	1935633.0	1936133.0		1937355.0	1937855.0	NC_000913.3	1885572.0				1886573.0	IS only present in query Strain.	1. DLIS	Complete IS hit.	b1802	carnitine monooxygenase subunit YeaW	-	Intergenic/Pseudo/Repeaed Region	b1802	carnitine monooxygenase subunit YeaW	b1803	carnitine monooxygenase subunit YeaX	4763752.0
1	1					143	sim2	2052101	149	sim2	42	IS30_IS30	2052101	2053321.0	NC_000913.3_art_ISs	2051600.0	2052100.0		2053322.0	2053822.0	NC_000913.3	2000318.0				2001319.0	IS only present in query Strain.	1. DLIS	Complete IS hit.	b1920	cystine ABC transporter periplasmic binding protein	b1922	RNA polymerase; sigma 28 (sigma F) factor	b1920	cystine ABC transporter periplasmic binding protein	b1922	RNA polymerase; sigma 28 (sigma F) factor	4763752.0
1	1					144	sim2	2149573	150	sim2	43	IS30_IS30	2149573	2150793.0	NC_000913.3_art_ISs	2149072.0	2149572.0		2150794.0	2151294.0	NC_000913.3	2096569.0				2097570.0	IS only present in query Strain.	1. DLIS	Complete IS hit.	b2025	imidazole glycerol phosphate synthase subunit HisF	b2027	regulator of length of O-antigen component of lipopolysaccharide chains	b2025	imidazole glycerol phosphate synthase subunit HisF	b2027	regulator of length of O-antigen component of lipopolysaccharide chains	4763752.0
1	1					145	sim2	2185564	151	sim2	44	IS30_IS30	2185564	2186784.0	NC_000913.3_art_ISs	2185063.0	2185563.0		2186785.0	2187285.0	NC_000913.3	2131339.0				2132340.0	IS only present in query Strain.	1. DLIS	Complete IS hit.	-	Intergenic/Pseudo/Repeaed Region	b2058	putative colanic acid biosynthesis acyl transferase	b2057	putative colanic acid biosynthesis glycosyl transferase	b2058	putative colanic acid biosynthesis acyl transferase	4763752.0
1	1					146	sim2	2199043	152	sim2	45	IS30_IS30	2199043	2200263.0	NC_000913.3_art_ISs	2198542.0	2199042.0		2200264.0	2200764.0	NC_000913.3	2143597.0				2144598.0	IS only present in query Strain.	1. DLIS	Complete IS hit.	-	Intergenic/Pseudo/Repeaed Region	-	Intergenic/Pseudo/Repeaed Region	b2067	putative diguanylate cyclase DgcE	b2067	putative diguanylate cyclase DgcE	4763752.0
1	1					147	sim2	2284693	153	sim2	46	IS30_IS30	2284693	2285913.0	NC_000913.3_art_ISs	2284192.0	2284692.0		2285914.0	2286414.0	NC_000913.3	2228026.0				2229027.0	IS only present in query Strain.	1. DLIS	Complete IS hit.	-	Intergenic/Pseudo/Repeaed Region	b4679	putative membrane protein YohP	b2139	putative multidrug resistance outer membrane protein MdtQ	b4679	putative membrane protein YohP	4763752.0
1	1					148	sim2	2307618	154	sim2	47	IS30_IS30	2307618	2308838.0	NC_000913.3_art_ISs	2307117.0	2307617.0		2308839.0	2309339.0	NC_000913.3	2249730.0				2250731.0	IS only present in query Strain.	1. DLIS	Complete IS hit.	-	Intergenic/Pseudo/Repeaed Region	-	Intergenic/Pseudo/Repeaed Region	b2158	conserved inner membrane protein YeiH	b2158	conserved inner membrane protein YeiH	4763752.0
1	1					149	sim2	2376337	155	sim2	48	IS30_IS30	2376337	2377557.0	NC_000913.3_art_ISs	2375836.0	2376336.0		2377558.0	2378058.0	NC_000913.3	2317228.0				2318229.0	IS only present in query Strain.	1. DLIS	Complete IS hit.	-	Intergenic/Pseudo/Repeaed Region	-	Intergenic/Pseudo/Repeaed Region	b2218	sensory histidine kinase RcsC	b2218	sensory histidine kinase RcsC	4763752.0
1	1					150	sim2	2448136	156	sim2	49	IS30_IS30	2448136	2449356.0	NC_000913.3_art_ISs	2447635.0	2448135.0		2449357.0	2449857.0	NC_000913.3	2387806.0				2388807.0	IS only present in query Strain.	1. DLIS	Complete IS hit.	-	Intergenic/Pseudo/Repeaed Region	b2274	uncharacterized protein YfbO	b2273	uncharacterized protein YfbN	b2274	uncharacterized protein YfbO	4763752.0
1	1					151	sim2	2459326	157	sim2	50	IS30_IS30	2459326	2460546.0	NC_000913.3_art_ISs	2458825.0	2459325.0		2460547.0	2461047.0	NC_000913.3	2397775.0				2398776.0	IS only present in query Strain.	1. DLIS	Complete IS hit.	-	Intergenic/Pseudo/Repeaed Region	-	Intergenic/Pseudo/Repeaed Region	b2283	NADH:quinone oxidoreductase subunit G	b2283	NADH:quinone oxidoreductase subunit G	4763752.0
1	1					154	sim2	2540869	158	sim2	51	IS30_IS30	2540869	2542089.0	NC_000913.3_art_ISs	2540368.0	2540868.0		2542090.0	2542590.0	NC_000913.3	2475655.0				2476656.0	IS only present in query Strain.	1. DLIS	Complete IS hit.	b2362	CPS-53 (KpLE1) prophage; protein YfdS	-	Intergenic/Pseudo/Repeaed Region	b2362	CPS-53 (KpLE1) prophage; protein YfdS	-	Intergenic/Pseudo/Repeaed Region	4763752.0
1	1					155	sim2	2651860	159	sim2	52	IS30_IS30	2651860	2653080.0	NC_000913.3_art_ISs	2651359.0	2651859.0		2653081.0	2653581.0	NC_000913.3	2585425.0				2586426.0	IS only present in query Strain.	1. DLIS	Complete IS hit.	b2468	putative oxidoreductase Fe-S subunit AegA	-	Intergenic/Pseudo/Repeaed Region	b2468	putative oxidoreductase Fe-S subunit AegA	b2469	sensory histidine kinase NarQ	4763752.0
1	1					156	sim2	2712943	160	sim2	53	IS30_IS30	2712943	2714163.0	NC_000913.3_art_ISs	2712442.0	2712942.0		2714164.0	2714664.0	NC_000913.3	2645287.0				2646288.0	IS only present in query Strain.	1. DLIS	Complete IS hit.	-	Intergenic/Pseudo/Repeaed Region	-	Intergenic/Pseudo/Repeaed Region	b2519	peptidoglycan glycosyltransferase PbpC	b2519	peptidoglycan glycosyltransferase PbpC	4763752.0
1	1					157	sim2	2720226	161	sim2	54	IS30_IS30	2720226	2721446.0	NC_000913.3_art_ISs	2719725.0	2720225.0		2721447.0	2721947.0	NC_000913.3	2651349.0				2652350.0	IS only present in query Strain.	1. DLIS	Complete IS hit.	-	Intergenic/Pseudo/Repeaed Region	-	Intergenic/Pseudo/Repeaed Region	b2520	alpha2-macroglobulin	-	Intergenic/Pseudo/Repeaed Region	4763752.0
1	1					158	sim2	2823780	162	sim2	55	IS30_IS30	2823780	2825000.0	NC_000913.3_art_ISs	2823279.0	2823779.0		2825001.0	2825501.0	NC_000913.3	2753682.0				2754683.0	IS only present in query Strain.	1. DLIS	Complete IS hit.	b2617	outer membrane protein assembly factor BamE	b2619	ribosome association toxin RatA	b2617	outer membrane protein assembly factor BamE	b2619	ribosome association toxin RatA	4763752.0
1	1					159	sim2	2902174	163	sim2	56	IS30_IS30	2902174	2903394.0	NC_000913.3_art_ISs	2901673.0	2902173.0		2903395.0	2903895.0	NC_000913.3	2830855.0				2831856.0	IS only present in query Strain.	1. DLIS	Complete IS hit.	-	Intergenic/Pseudo/Repeaed Region	-	Intergenic/Pseudo/Repeaed Region	b2709	DNA-binding transcriptional dual regulator NorR	b2709	DNA-binding transcriptional dual regulator NorR	4763752.0
1	1					160	sim2	2981376	164	sim2	57	IS30_IS30	2981376	2982596.0	NC_000913.3_art_ISs	2980875.0	2981375.0		2982597.0	2983097.0	NC_000913.3	2908836.0				2909837.0	IS only present in query Strain.	1. DLIS	Complete IS hit.	-	Intergenic/Pseudo/Repeaed Region	-	Intergenic/Pseudo/Repeaed Region	b2780	CTP synthetase	-	Intergenic/Pseudo/Repeaed Region	4763752.0
1	1					161	sim2	2997946	165	sim2	58	IS30_IS30	2997946	2999166.0	NC_000913.3_art_ISs	2997445.0	2997945.0		2999167.0	2999667.0	NC_000913.3	2924185.0				2925186.0	IS only present in query Strain.	1. DLIS	Complete IS hit.	-	Intergenic/Pseudo/Repeaed Region	b2793	SecY-interacting protein	-	Intergenic/Pseudo/Repeaed Region	b2793	SecY-interacting protein	4763752.0
1	1					162	sim2	3076646	166	sim2	59	IS30_IS30	3076646	3077866.0	NC_000913.3_art_ISs	3076145.0	3076645.0		3077867.0	3078367.0	NC_000913.3	3001664.0				3002665.0	IS only present in query Strain.	1. DLIS	Complete IS hit.	-	Intergenic/Pseudo/Repeaed Region	b2867	putative xanthine dehydrogenase FAD-binding subunit XdhB	b2866	putative xanthine dehydrogenase molybdenum-binding subunit XdhA	b2867	putative xanthine dehydrogenase FAD-binding subunit XdhB	4763752.0
1	1					163	sim2	3132235	167	sim2	60	IS30_IS30	3132235	3133455.0	NC_000913.3_art_ISs	3131734.0	3132234.0		3133456.0	3133956.0	NC_000913.3	3056032.0				3057033.0	IS only present in query Strain.	1. DLIS	Complete IS hit.	-	Intergenic/Pseudo/Repeaed Region	-	Intergenic/Pseudo/Repeaed Region	-	Intergenic/Pseudo/Repeaed Region	-	Intergenic/Pseudo/Repeaed Region	4763752.0
1	1					164	sim2	3147950	168	sim2	61	IS30_IS30	3147950	3149170.0	NC_000913.3_art_ISs	3147449.0	3147949.0		3149171.0	3149671.0	NC_000913.3	3070526.0				3071527.0	IS only present in query Strain.	1. DLIS	Complete IS hit.	-	Intergenic/Pseudo/Repeaed Region	b2926	phosphoglycerate kinase	b2925	fructose-bisphosphate aldolase class II	b2926	phosphoglycerate kinase	4763752.0
1	1					165	sim2	3243083	169	sim2	62	IS30_IS30	3243083	3244303.0	NC_000913.3_art_ISs	3242582.0	3243082.0		3244304.0	3244804.0	NC_000913.3	3164438.0				3165439.0	IS only present in query Strain.	1. DLIS	Complete IS hit.	-	Intergenic/Pseudo/Repeaed Region	-	Intergenic/Pseudo/Repeaed Region	b3019	DNA topoisomerase IV subunit A	b3019	DNA topoisomerase IV subunit A	4763752.0
1	1					166	sim2	3274099	170	sim2	63	IS30_IS30	3274099	3275319.0	NC_000913.3_art_ISs	3273598.0	3274098.0		3275320.0	3275820.0	NC_000913.3	3194233.0				3195234.0	IS only present in query Strain.	1. DLIS	Complete IS hit.	b3051	protein YqiK	-	Intergenic/Pseudo/Repeaed Region	b3051	protein YqiK	-	Intergenic/Pseudo/Repeaed Region	4763752.0
1	1					167	sim2	3307813	171	sim2	64	IS30_IS30	3307813	3309033.0	NC_000913.3_art_ISs	3307312.0	3307812.0		3309034.0	3309534.0	NC_000913.3	3226726.0				3227727.0	IS only present in query Strain.	1. DLIS	Complete IS hit.	-	Intergenic/Pseudo/Repeaed Region	-	Intergenic/Pseudo/Repeaed Region	b3078	putative transporter YgjI	-	Intergenic/Pseudo/Repeaed Region	4763752.0
1	1					168	sim2	3355378	172	sim2	65	IS30_IS30	3355378	3356598.0	NC_000913.3_art_ISs	3354877.0	3355377.0		3356599.0	3357099.0	NC_000913.3	3273070.0				3274071.0	IS only present in query Strain.	1. DLIS	Complete IS hit.	b3126	alpha-dehydro-beta-deoxy-D-glucarate aldolase	b3127	galactarate/glucarate/glycerate transporter GarP	b3126	alpha-dehydro-beta-deoxy-D-glucarate aldolase	b3127	galactarate/glucarate/glycerate transporter GarP	4763752.0
1	1					171	sim2	3470653	173	sim2	66	IS30_IS30	3470653	3471873.0	NC_000913.3_art_ISs	3470152.0	3470652.0		3471874.0	3472374.0	NC_000913.3	3384682.0				3385683.0	IS only present in query Strain.	1. DLIS	Complete IS hit.	-	Intergenic/Pseudo/Repeaed Region	b3238	DUF1471 domain-containing stress-induced protein YhcN	-	Intergenic/Pseudo/Repeaed Region	b3238	DUF1471 domain-containing stress-induced protein YhcN	4763752.0
1	1					172	sim2	3476285	174	sim2	67	IS30_IS30	3476285	3477505.0	NC_000913.3_art_ISs	3475784.0	3476284.0		3477506.0	3478006.0	NC_000913.3	3389093.0				3390094.0	IS only present in query Strain.	1. DLIS	Complete IS hit.	b3241	aromatic carboxylic acid efflux pump membrane fusion protein	-	Intergenic/Pseudo/Repeaed Region	b3241	aromatic carboxylic acid efflux pump membrane fusion protein	b3243	LysR-type transcriptional regulator AaeR	4763752.0
1	1					173	sim2	3485390	175	sim2	68	IS30_IS30	3485390	3486610.0	NC_000913.3_art_ISs	3484889.0	3485389.0		3486611.0	3487111.0	NC_000913.3	3396977.0				3397978.0	IS only present in query Strain.	1. DLIS	Complete IS hit.	-	Intergenic/Pseudo/Repeaed Region	b3248	nucleoside triphosphate pyrophosphatase YhdE	b3247	RNase G	b3248	nucleoside triphosphate pyrophosphatase YhdE	4763752.0
1	1					174	sim2	3496943	176	sim2	69	IS30_IS30	3496943	3498163.0	NC_000913.3_art_ISs	3496442.0	3496942.0		3498164.0	3498664.0	NC_000913.3	3407309.0				3408310.0	IS only present in query Strain.	1. DLIS	Complete IS hit.	-	Intergenic/Pseudo/Repeaed Region	-	Intergenic/Pseudo/Repeaed Region	-	Intergenic/Pseudo/Repeaed Region	b3258	pantothenate:Na(+) symporter	4763752.0
1	1					175	sim2	3512177	177	sim2	70	IS30_IS30	3512177	3513397.0	NC_000913.3_art_ISs	3511676.0	3512176.0		3513398.0	3513898.0	NC_000913.3	3421322.0				3422323.0	IS only present in query Strain.	1. DLIS	Complete IS hit.	-	Intergenic/Pseudo/Repeaed Region	-	Intergenic/Pseudo/Repeaed Region	-	Intergenic/Pseudo/Repeaed Region	b3270	putative ABC transporter membrane subunit YhdY	4763752.0
1	1					176	sim2	3517915	178	sim2	71	IS30_IS30	3517915	3519135.0	NC_000913.3_art_ISs	3517414.0	3517914.0		3519136.0	3519636.0	NC_000913.3	2728240.0				2729241.0	IS only present in query Strain.	1. DLIS	Complete IS hit.	-	Intergenic/Pseudo/Repeaed Region	-	Intergenic/Pseudo/Repeaed Region	-	Intergenic/Pseudo/Repeaed Region	-	Intergenic/Pseudo/Repeaed Region	4763752.0
1	1					177	sim2	3530796	179	sim2	72	IS30_IS30	3530796	3532016.0	NC_000913.3_art_ISs	3530295.0	3530795.0		3532017.0	3532517.0	NC_000913.3	3437499.0				3438500.0	IS only present in query Strain.	1. DLIS	Complete IS hit.	b3290	NAD-binding component of Trk potassium transporters	b4550	alternative ribosome-rescue factor A	b3290	NAD-binding component of Trk potassium transporters	b4550	alternative ribosome-rescue factor A	4763752.0
1	1					178	sim2	3541207	180	sim2	73	IS30_IS30	3541207	3542427.0	NC_000913.3_art_ISs	3540706.0	3541206.0		3542428.0	3542928.0	NC_000913.3	3446689.0				3447690.0	IS only present in query Strain.	1. DLIS	Complete IS hit.	b3307	30S ribosomal subunit protein S14	b3309	50S ribosomal subunit protein L24	b3307	30S ribosomal subunit protein S14	b3309	50S ribosomal subunit protein L24	4763752.0
1	1					179	sim2	3585254	181	sim2	74	IS30_IS30	3585254	3586474.0	NC_000913.3_art_ISs	3584753.0	3585253.0		3586475.0	3586975.0	NC_000913.3	3489515.0				3490516.0	IS only present in query Strain.	1. DLIS	Complete IS hit.	-	Intergenic/Pseudo/Repeaed Region	b3360	aminodeoxychorismate synthase subunit 2	b3359	N-acetylornithine aminotransferase/N-succinyldiaminopimelate aminotransferase	b3360	aminodeoxychorismate synthase subunit 2	4763752.0
1	1					180	sim2	3633940	182	sim2	75	IS30_IS30	3633940	3635160.0	NC_000913.3_art_ISs	3633439.0	3633939.0		3635161.0	3635661.0	NC_000913.3	3536980.0				3537981.0	IS only present in query Strain.	1. DLIS	Complete IS hit.	b3406	transcription elongation factor GreB	-	Intergenic/Pseudo/Repeaed Region	b3406	transcription elongation factor GreB	b3407	putative RNA-binding protein YhgF	4763752.0
1	1					181	sim2	3641955	183	sim2	76	IS30_IS30	3641955	3643175.0	NC_000913.3_art_ISs	3641454.0	3641954.0		3643176.0	3643676.0	NC_000913.3	3543774.0				3544775.0	IS only present in query Strain.	1. DLIS	Complete IS hit.	b3411	recombination-promoting nuclease RpnA	-	Intergenic/Pseudo/Repeaed Region	b3411	recombination-promoting nuclease RpnA	b3412	pimeloyl-acyl carrier protein methyl ester esterase	4763752.0
1	1					182	sim2	3654471	184	sim2	77	IS30_IS30	3654471	3655691.0	NC_000913.3_art_ISs	3653970.0	3654470.0		3655692.0	3656192.0	NC_000913.3	3555069.0				3556070.0	IS only present in query Strain.	1. DLIS	Complete IS hit.	-	Intergenic/Pseudo/Repeaed Region	b4475	RNA 3'-terminal phosphate cyclase	b3418	DNA-binding transcriptional activator MalT	b4475	RNA 3'-terminal phosphate cyclase	4763752.0
1	1					183	sim2	3686472	185	sim2	78	IS30_IS30	3686472	3687692.0	NC_000913.3_art_ISs	3685971.0	3686471.0		3687693.0	3688193.0	NC_000913.3	3585849.0				3586850.0	IS only present in query Strain.	1. DLIS	Complete IS hit.	-	Intergenic/Pseudo/Repeaed Region	-	Intergenic/Pseudo/Repeaed Region	b3447	glutathione hydrolase proenzyme	-	Intergenic/Pseudo/Repeaed Region	4763752.0
1	1					184	sim2	3751881	186	sim2	79	IS30_IS30	3751881	3753101.0	NC_000913.3_art_ISs	3751380.0	3751880.0		3753102.0	3753602.0	NC_000913.3	3650037.0				3651038.0	IS only present in query Strain.	1. DLIS	Complete IS hit.	b3502	arsenite/antimonite:H(+) antiporter	-	Intergenic/Pseudo/Repeaed Region	b3502	arsenite/antimonite:H(+) antiporter	-	Intergenic/Pseudo/Repeaed Region	4763752.0
1	1					185	sim2	3762001	187	sim2	80	IS30_IS30	3762001	3763221.0	NC_000913.3_art_ISs	3761500.0	3762000.0		3763222.0	3763722.0	NC_000913.3	3658936.0				3659937.0	IS only present in query Strain.	1. DLIS	Complete IS hit.	-	Intergenic/Pseudo/Repeaed Region	-	Intergenic/Pseudo/Repeaed Region	-	Intergenic/Pseudo/Repeaed Region	b3513	multidrug efflux pump membrane fusion protein MdtE	4763752.0
1	1					186	sim2	3817650	188	sim2	81	IS30_IS30	3817650	3818870.0	NC_000913.3_art_ISs	3817149.0	3817649.0		3818871.0	3819371.0	NC_000913.3	3713364.0				3714365.0	IS only present in query Strain.	1. DLIS	Complete IS hit.	b3549	3-methyl-adenine DNA glycosylase I; constitutive	b3551	biotin sulfoxide reductase	b3549	3-methyl-adenine DNA glycosylase I; constitutive	b3551	biotin sulfoxide reductase	4763752.0
1	1					187	sim2	3894978	189	sim2	82	IS30_IS30	3894978	3896198.0	NC_000913.3_art_ISs	3894477.0	3894977.0		3896199.0	3896699.0	NC_000913.3	3789471.0				3790472.0	IS only present in query Strain.	1. DLIS	Complete IS hit.	-	Intergenic/Pseudo/Repeaed Region	b3616	threonine dehydrogenase	b3615	UDP-glucuronate:LPS(HepIII) glycosyltransferase	b3616	threonine dehydrogenase	4763752.0
1	1					188	sim2	3913175	190	sim2	83	IS30_IS30	3913175	3914395.0	NC_000913.3_art_ISs	3912674.0	3913174.0		3914396.0	3914896.0	NC_000913.3	3806447.0				3807448.0	IS only present in query Strain.	1. DLIS	Complete IS hit.	-	Intergenic/Pseudo/Repeaed Region	b3632	lipopolysaccharide core heptosyltransferase 3	b3631	lipopolysaccharide glucosyltransferase I	b3632	lipopolysaccharide core heptosyltransferase 3	4763752.0
1	1					189	sim2	4036576	191	sim2	84	IS30_IS30	4036576	4037796.0	NC_000913.3_art_ISs	4036075.0	4036575.0		4037797.0	4038297.0	NC_000913.3	3928627.0				3929628.0	IS only present in query Strain.	1. DLIS	Complete IS hit.	-	Intergenic/Pseudo/Repeaed Region	b3746	regulatory ATPase RavA	b3745	protein ViaA	b3746	regulatory ATPase RavA	4763752.0
1	1					190	sim2	4122756	192	sim2	85	IS30_IS30	4122756	4123976.0	NC_000913.3_art_ISs	4122255.0	4122755.0		4123977.0	4124477.0	NC_000913.3	4013586.0				4014587.0	IS only present in query Strain.	1. DLIS	Complete IS hit.	-	Intergenic/Pseudo/Repeaed Region	-	Intergenic/Pseudo/Repeaed Region	b3829	cobalamin-independent homocysteine transmethylase	b3829	cobalamin-independent homocysteine transmethylase	4763752.0
1	1					193	sim2	4183593	193	sim2	86	IS30_IS30	4183593	4184813.0	NC_000913.3_art_ISs	4183092.0	4183592.0		4184814.0	4185314.0	NC_000913.3	4070760.0				4071761.0	IS only present in query Strain.	1. DLIS	Complete IS hit.	-	Intergenic/Pseudo/Repeaed Region	-	Intergenic/Pseudo/Repeaed Region	b3880	sulfoquinovose isomerase	-	Intergenic/Pseudo/Repeaed Region	4763752.0
1	1					194	sim2	4186267	194	sim2	87	IS30_IS30	4186267	4187487.0	NC_000913.3_art_ISs	4185766.0	4186266.0		4187488.0	4187988.0	NC_000913.3	4072213.0				4073214.0	IS only present in query Strain.	1. DLIS	Complete IS hit.	b3881	6-deoxy-6-sulfofructose-1-phosphate aldolase	-	Intergenic/Pseudo/Repeaed Region	b3881	6-deoxy-6-sulfofructose-1-phosphate aldolase	b3882	3-sulfolactaldehyde reductase	4763752.0
1	1					195	sim2	4248871	195	sim2	88	IS30_IS30	4248871	4250091.0	NC_000913.3_art_ISs	4248370.0	4248870.0		4250092.0	4250592.0	NC_000913.3	4133596.0				4134597.0	IS only present in query Strain.	1. DLIS	Complete IS hit.	-	Intergenic/Pseudo/Repeaed Region	-	Intergenic/Pseudo/Repeaed Region	-	Intergenic/Pseudo/Repeaed Region	b3942	hydroperoxidase I	4763752.0
1	1					196	sim2	4268478	196	sim2	89	IS30_IS30	4268478	4269698.0	NC_000913.3_art_ISs	4267977.0	4268477.0		4269699.0	4270199.0	NC_000913.3	4151982.0				4152983.0	IS only present in query Strain.	1. DLIS	Complete IS hit.	-	Intergenic/Pseudo/Repeaed Region	-	Intergenic/Pseudo/Repeaed Region	b3956	phosphoenolpyruvate carboxylase	b3956	phosphoenolpyruvate carboxylase	4763752.0
1	1					197	sim2	4293674	197	sim2	90	IS30_IS30	4293674	4294894.0	NC_000913.3_art_ISs	4293173.0	4293673.0		4294895.0	4295395.0	NC_000913.3	3470315.0				3471314.0	IS only present in query Strain.	1. DLIS	Complete IS hit.	-	Intergenic/Pseudo/Repeaed Region	-	Intergenic/Pseudo/Repeaed Region	b3339	translation elongation factor Tu 1	b3339	translation elongation factor Tu 1	4763752.0
1	1					198	sim2	4478655	198	sim2	91	IS30_IS30	4478655	4479875.0	NC_000913.3_art_ISs	4478154.0	4478654.0		4479876.0	4480376.0	NC_000913.3	4359717.0				4360718.0	IS only present in query Strain.	1. DLIS	Complete IS hit.	b4132	lysine:cadaverine antiporter	b4133	DNA-binding transcriptional activator CadC	b4132	lysine:cadaverine antiporter	b4133	DNA-binding transcriptional activator CadC	4763752.0
1	1					199	sim2	4594169	199	sim2	92	IS30_IS30	4594169	4595389.0	NC_000913.3_art_ISs	4593668.0	4594168.0		4595390.0	4595890.0	NC_000913.3	4474010.0				4475011.0	IS only present in query Strain.	1. DLIS	Complete IS hit.	b4249	c-di-GMP-binding biofilm dispersal mediator protein	b4252	DUF386 domain-containing toxin-antitoxin biofilm protein TabA	b4249	c-di-GMP-binding biofilm dispersal mediator protein	b4252	DUF386 domain-containing toxin-antitoxin biofilm protein TabA	4763752.0
1	1					200	sim2	4622928	200	sim2	93	IS30_IS30	4622928	4624148.0	NC_000913.3_art_ISs	4622427.0	4622927.0		4624149.0	4624649.0	NC_000913.3	4501548.0				4502549.0	IS only present in query Strain.	1. DLIS	Complete IS hit.	b4277	KpLE2 phage-like element; uncharacterized protein YjgZ	b4278	KpLE2 phage-like element; IS4 putative transposase	b4277	KpLE2 phage-like element; uncharacterized protein YjgZ	b4278	KpLE2 phage-like element; IS4 putative transposase	4763752.0
1	1					201	sim3	71181	224	sim3	0	IS30_IS30	71181	72401.0	NC_000913.3_art_ISs	70680.0	71180.0		72402.0	72902.0	NC_000913.3	70680.0				71681.0	IS only present in query Strain.	1. DLIS	Complete IS hit.	-	Intergenic/Pseudo/Repeaed Region	b0065	DedA family protein YabI	b0064	DNA-binding transcriptional dual regulator AraC	b0065	DedA family protein YabI	4763752.0
1	1					202	sim3	162247	225	sim3	1	IS30_IS30	162247	163467.0	NC_000913.3_art_ISs	161746.0	162246.0		163468.0	163968.0	NC_000913.3	160525.0				161526.0	IS only present in query Strain.	1. DLIS	Complete IS hit.	b0145	RNA polymerase-binding transcription factor DksA	b0147	RNA 2';3'-cyclic phosphodiesterase	b0145	RNA polymerase-binding transcription factor DksA	b0147	RNA 2';3'-cyclic phosphodiesterase	4763752.0
1	1					203	sim3	183914	226	sim3	2	IS30_IS30	183914	185134.0	NC_000913.3_art_ISs	183413.0	183913.0		185135.0	185635.0	NC_000913.3	180971.0				181972.0	IS only present in query Strain.	1. DLIS	Complete IS hit.	-	Intergenic/Pseudo/Repeaed Region	-	Intergenic/Pseudo/Repeaed Region	b0161	periplasmic serine endoprotease DegP	b0161	periplasmic serine endoprotease DegP	4763752.0
1	1					204	sim3	221266	227	sim3	3	IS30_IS30	221266	222486.0	NC_000913.3_art_ISs	220765.0	221265.0		222487.0	222987.0	NC_000913.3	217102.0				218103.0	IS only present in query Strain.	1. DLIS	Complete IS hit.	-	Intergenic/Pseudo/Repeaed Region	-	Intergenic/Pseudo/Repeaed Region	b0194	proline--tRNA ligase	b0194	proline--tRNA ligase	4763752.0
1	1					205	sim3	364297	228	sim3	4	IS30_IS30	364297	365517.0	NC_000913.3_art_ISs	363796.0	364296.0		365518.0	366018.0	NC_000913.3	358912.0				359913.0	IS only present in query Strain.	1. DLIS	Complete IS hit.	-	Intergenic/Pseudo/Repeaed Region	b0340	cyanase	b0339	carbonic anhydrase 1	b0340	cyanase	4763752.0
1	1					206	sim3	413474	229	sim3	5	IS30_IS30	413474	414694.0	NC_000913.3_art_ISs	412973.0	413473.0		414695.0	415195.0	NC_000913.3	406868.0				407869.0	IS only present in query Strain.	1. DLIS	Complete IS hit.	b0388	shikimate kinase 2	b0390	protein AroM	b0388	shikimate kinase 2	b0390	protein AroM	4763752.0
1	1					207	sim3	539819	230	sim3	6	IS30_IS30	539819	541039.0	NC_000913.3_art_ISs	539318.0	539818.0		541040.0	541540.0	NC_000913.3	531992.0				532993.0	IS only present in query Strain.	1. DLIS	Complete IS hit.	b0504	DNA-binding transcriptional activator AllS	-	Intergenic/Pseudo/Repeaed Region	b0504	DNA-binding transcriptional activator AllS	-	Intergenic/Pseudo/Repeaed Region	4763752.0
1	1					208	sim3	555991	231	sim3	7	IS30_IS30	555991	557211.0	NC_000913.3_art_ISs	555490.0	555990.0		557212.0	557712.0	NC_000913.3	546943.0				547944.0	IS only present in query Strain.	1. DLIS	Complete IS hit.	-	Intergenic/Pseudo/Repeaed Region	-	Intergenic/Pseudo/Repeaed Region	b0518	putative acyl-CoA synthetase FdrA	b0518	putative acyl-CoA synthetase FdrA	4763752.0
1	1					209	sim3	622653	232	sim3	8	IS30_IS30	622653	623873.0	NC_000913.3_art_ISs	622152.0	622652.0		623874.0	624374.0	NC_000913.3	612384.0				613385.0	IS only present in query Strain.	1. DLIS	Complete IS hit.	b0584	ferric enterobactin outer membrane transporter	-	Intergenic/Pseudo/Repeaed Region	b0584	ferric enterobactin outer membrane transporter	b0585	enterochelin esterase	4763752.0
1	1					210	sim3	631834	233	sim3	9	IS30_IS30	631834	633054.0	NC_000913.3_art_ISs	631333.0	631833.0		633055.0	633555.0	NC_000913.3	620344.0				621345.0	IS only present in query Strain.	1. DLIS	Complete IS hit.	-	Intergenic/Pseudo/Repeaed Region	b0590	ferric enterobactin ABC transporter membrane subunit FebD	b0589	ferric enterobactin ABC transporter membrane subunit FepG	b0590	ferric enterobactin ABC transporter membrane subunit FebD	4763752.0
1	1					211	sim3	720670	234	sim3	10	IS30_IS30	720670	721890.0	NC_000913.3_art_ISs	720169.0	720669.0		721891.0	722391.0	NC_000913.3	707959.0				708960.0	IS only present in query Strain.	1. DLIS	Complete IS hit.	-	Intergenic/Pseudo/Repeaed Region	-	Intergenic/Pseudo/Repeaed Region	-	Intergenic/Pseudo/Repeaed Region	b0681	chitobiose outer membrane channel	4763752.0
1	1					212	sim3	766234	235	sim3	11	IS30_IS30	766234	767454.0	NC_000913.3_art_ISs	765733.0	766233.0		767455.0	767955.0	NC_000913.3	752302.0				753303.0	IS only present in query Strain.	1. DLIS	Complete IS hit.	b0719	putative fimbrial protein YbgD	b0720	citrate synthase	b0719	putative fimbrial protein YbgD	b0720	citrate synthase	4763752.0
1	1					213	sim3	799952	236	sim3	12	IS30_IS30	799952	801172.0	NC_000913.3_art_ISs	799451.0	799951.0		801173.0	801673.0	NC_000913.3	784799.0				785800.0	IS only present in query Strain.	1. DLIS	Complete IS hit.	b0752	Zn(2(+))/Cd(2(+))/Ni(2(+))/Cu(2(+)) exporter	b0754	3-deoxy-7-phosphoheptulonate synthase; Phe-sensitive	b0752	Zn(2(+))/Cd(2(+))/Ni(2(+))/Cu(2(+)) exporter	b0754	3-deoxy-7-phosphoheptulonate synthase; Phe-sensitive	4763752.0
1	1					214	sim3	851713	237	sim3	13	IS30_IS30	851713	852933.0	NC_000913.3_art_ISs	851212.0	851712.0		852934.0	853434.0	NC_000913.3	835339.0				836340.0	IS only present in query Strain.	1. DLIS	Complete IS hit.	-	Intergenic/Pseudo/Repeaed Region	-	Intergenic/Pseudo/Repeaed Region	b0800	nonspecific DNA-binding protein YbiB	-	Intergenic/Pseudo/Repeaed Region	4763752.0
1	1					215	sim3	915936	238	sim3	14	IS30_IS30	915936	917156.0	NC_000913.3_art_ISs	915435.0	915935.0		917157.0	917657.0	NC_000913.3	898341.0				899342.0	IS only present in query Strain.	1. DLIS	Complete IS hit.	b0858	putative inner membrane protein	-	Intergenic/Pseudo/Repeaed Region	b0858	putative inner membrane protein	b0859	23S rRNA m(5)U747 methyltransferase	4763752.0
1	1					216	sim3	930680	239	sim3	15	IS30_IS30	930680	931900.0	NC_000913.3_art_ISs	930179.0	930679.0		931901.0	932401.0	NC_000913.3	911864.0				912865.0	IS only present in query Strain.	1. DLIS	Complete IS hit.	b0872	NADH oxidoreductase	-	Intergenic/Pseudo/Repeaed Region	b0872	NADH oxidoreductase	b0873	protein S-nitrosylase	4763752.0
1	1					217	sim3	951755	240	sim3	16	IS30_IS30	951755	952975.0	NC_000913.3_art_ISs	951254.0	951754.0		952976.0	953476.0	NC_000913.3	931718.0				932719.0	IS only present in query Strain.	1. DLIS	Complete IS hit.	b0888	thioredoxin reductase	b0889	DNA-binding transcriptional dual regulator Lrp	b0888	thioredoxin reductase	b0889	DNA-binding transcriptional dual regulator Lrp	4763752.0
1	1					218	sim3	993647	241	sim3	17	IS30_IS30	993647	994867.0	NC_000913.3_art_ISs	993146.0	993646.0		994868.0	995368.0	NC_000913.3	972389.0				973390.0	IS only present in query Strain.	1. DLIS	Complete IS hit.	b0919	putative phosphotransferase YcbJ	-	Intergenic/Pseudo/Repeaed Region	b0919	putative phosphotransferase YcbJ	b0920	envelope biogenesis factor	4763752.0
1	1					219	sim3	1047619	242	sim3	18	IS30_IS30	1047619	1048839.0	NC_000913.3_art_ISs	1047118.0	1047618.0		1048840.0	1049340.0	NC_000913.3	1025140.0				1026141.0	IS only present in query Strain.	1. DLIS	Complete IS hit.	-	Intergenic/Pseudo/Repeaed Region	-	Intergenic/Pseudo/Repeaed Region	b0962	DNA helicase IV	b0962	DNA helicase IV	4763752.0
1	1					220	sim3	1095174	243	sim3	19	IS30_IS30	1095174	1096394.0	NC_000913.3_art_ISs	1094673.0	1095173.0		1096395.0	1096895.0	NC_000913.3	1071474.0				1072475.0	IS only present in query Strain.	1. DLIS	Complete IS hit.	b1009	putative aminoacrylate hydrolase	b1011	peroxyureidoacrylate/ureidoacrylate amidohydrolase	b1009	putative aminoacrylate hydrolase	b1011	peroxyureidoacrylate/ureidoacrylate amidohydrolase	4763752.0
1	1					221	sim3	1142139	244	sim3	20	IS30_IS30	1142139	1143359.0	NC_000913.3_art_ISs	1141638.0	1142138.0		1143360.0	1143860.0	NC_000913.3	1117218.0				1118219.0	IS only present in query Strain.	1. DLIS	Complete IS hit.	-	Intergenic/Pseudo/Repeaed Region	b1056	protein YceI	b1055	UPF0176 protein YceA	b1056	protein YceI	4763752.0
1	1					222	sim3	1153760	245	sim3	21	IS30_IS30	1153760	1154980.0	NC_000913.3_art_ISs	1153259.0	1153759.0		1154981.0	1155481.0	NC_000913.3	1127618.0				1128619.0	IS only present in query Strain.	1. DLIS	Complete IS hit.	b1068	putative oxidoreductase YceM	-	Intergenic/Pseudo/Repeaed Region	b1068	putative oxidoreductase YceM	b1069	putative lipid II flippase MurJ	4763752.0
1	1					223	sim3	1182149	246	sim3	22	IS30_IS30	1182149	1183369.0	NC_000913.3_art_ISs	1181648.0	1182148.0		1183370.0	1183870.0	NC_000913.3	1154786.0				1155787.0	IS only present in query Strain.	1. DLIS	Complete IS hit.	b1097	endolytic murein transglycosylase	b1099	DNA polymerase III subunit delta'	b1097	endolytic murein transglycosylase	b1099	DNA polymerase III subunit delta'	4763752.0
1	1					224	sim3	1235743	247	sim3	23	IS30_IS30	1235743	1236963.0	NC_000913.3_art_ISs	1235242.0	1235742.0		1236964.0	1237464.0	NC_000913.3	1207159.0				1208160.0	IS only present in query Strain.	1. DLIS	Complete IS hit.	b1153	e14 prophage; conserved protein YmfQ	b1155	e14 prophage; putative tail fiber assembly protein TfaP	b1153	e14 prophage; conserved protein YmfQ	b1155	e14 prophage; putative tail fiber assembly protein TfaP	4763752.0
1	1					225	sim3	1276958	248	sim3	24	IS30_IS30	1276958	1278178.0	NC_000913.3_art_ISs	1276457.0	1276957.0		1278179.0	1278679.0	NC_000913.3	1247153.0				1248154.0	IS only present in query Strain.	1. DLIS	Complete IS hit.	b1197	periplasmic trehalase	b1198	dihydroxyacetone kinase subunit M	b1197	periplasmic trehalase	b1198	dihydroxyacetone kinase subunit M	4763752.0
1	1					226	sim3	1356582	249	sim3	25	IS30_IS30	1356582	1357802.0	NC_000913.3_art_ISs	1356081.0	1356581.0		1357803.0	1358303.0	NC_000913.3	1325556.0				1326557.0	IS only present in query Strain.	1. DLIS	Complete IS hit.	-	Intergenic/Pseudo/Repeaed Region	-	Intergenic/Pseudo/Repeaed Region	b1268	DUF2207 domain-containing protein YciQ	b1268	DUF2207 domain-containing protein YciQ	4763752.0
1	1					227	sim3	1453849	250	sim3	26	IS30_IS30	1453849	1455069.0	NC_000913.3_art_ISs	1453348.0	1453848.0		1455070.0	1455570.0	NC_000913.3	1421602.0				1422603.0	IS only present in query Strain.	1. DLIS	Complete IS hit.	b1359	Rac prophage; DUF1376 domain-containing protein YdaU	-	Intergenic/Pseudo/Repeaed Region	b1359	Rac prophage; DUF1376 domain-containing protein YdaU	b1360	Rac prophage; putative ATP-binding protein YdaV	4763752.0
1	1					228	sim3	1473125	251	sim3	27	IS30_IS30	1473125	1474345.0	NC_000913.3_art_ISs	1472624.0	1473124.0		1474346.0	1474846.0	NC_000913.3	1439657.0				1440658.0	IS only present in query Strain.	1. DLIS	Complete IS hit.	-	Intergenic/Pseudo/Repeaed Region	-	Intergenic/Pseudo/Repeaed Region	b1378	putative pyruvate-flavodoxin oxidoreductase	b1378	putative pyruvate-flavodoxin oxidoreductase	4763752.0
1	1					229	sim3	1561800	252	sim3	28	IS30_IS30	1561800	1563020.0	NC_000913.3_art_ISs	1561299.0	1561799.0		1563021.0	1563521.0	NC_000913.3	1527111.0				1528112.0	IS only present in query Strain.	1. DLIS	Complete IS hit.	b1455	DUF5445 domain-containing protein YncH	b1456	RhsE protein in rhs element	b1455	DUF5445 domain-containing protein YncH	b1456	RhsE protein in rhs element	4763752.0
1	1					230	sim3	1594107	253	sim3	29	IS30_IS30	1594107	1595327.0	NC_000913.3_art_ISs	1593606.0	1594106.0		1595328.0	1595828.0	NC_000913.3	1558197.0				1559198.0	IS only present in query Strain.	1. DLIS	Complete IS hit.	-	Intergenic/Pseudo/Repeaed Region	b1485	putative D;D-dipeptide ABC transporter membrane subunit DdpC	b1484	putative D;D-dipeptide ABC transporter ATP-binding subunit DdpD	b1485	putative D;D-dipeptide ABC transporter membrane subunit DdpC	4763752.0
1	1					231	sim3	1621157	254	sim3	30	IS30_IS30	1621157	1622377.0	NC_000913.3_art_ISs	1620656.0	1621156.0		1622378.0	1622878.0	NC_000913.3	1584026.0				1585027.0	IS only present in query Strain.	1. DLIS	Complete IS hit.	-	Intergenic/Pseudo/Repeaed Region	-	Intergenic/Pseudo/Repeaed Region	-	Intergenic/Pseudo/Repeaed Region	b1501	putative oxidoreductase YdeP	4763752.0
1	1					232	sim3	1660984	255	sim3	31	IS30_IS30	1660984	1662204.0	NC_000913.3_art_ISs	1660483.0	1660983.0		1662205.0	1662705.0	NC_000913.3	1622632.0				1623633.0	IS only present in query Strain.	1. DLIS	Complete IS hit.	-	Intergenic/Pseudo/Repeaed Region	-	Intergenic/Pseudo/Repeaed Region	-	Intergenic/Pseudo/Repeaed Region	b1535	diguanylate cyclase DgcZ	4763752.0
1	1					233	sim3	1759239	256	sim3	32	IS30_IS30	1759239	1760459.0	NC_000913.3_art_ISs	1758738.0	1759238.0		1760460.0	1760960.0	NC_000913.3	1719666.0				1720667.0	IS only present in query Strain.	1. DLIS	Complete IS hit.	-	Intergenic/Pseudo/Repeaed Region	b1642	DNA-binding transcriptional dual regulator SlyA	-	Intergenic/Pseudo/Repeaed Region	b1642	DNA-binding transcriptional dual regulator SlyA	4763752.0
1	1					234	sim3	1875031	257	sim3	33	IS30_IS30	1875031	1876251.0	NC_000913.3_art_ISs	1874530.0	1875030.0		1876252.0	1876752.0	NC_000913.3	1834237.0				1835238.0	IS only present in query Strain.	1. DLIS	Complete IS hit.	-	Intergenic/Pseudo/Repeaed Region	b1752	DedA family protein YdjZ	b1751	4Fe-4S ferredoxin-type domain-containing protein YdjY	b1752	DedA family protein YdjZ	4763752.0
1	1					235	sim3	1900160	258	sim3	34	IS30_IS30	1900160	1901380.0	NC_000913.3_art_ISs	1899659.0	1900159.0		1901381.0	1901881.0	NC_000913.3	1858145.0				1859146.0	IS only present in query Strain.	1. DLIS	Complete IS hit.	-	Intergenic/Pseudo/Repeaed Region	b1775	putative transporter YdjK	b1774	putative zinc-binding dehydrogenase YdjJ	b1775	putative transporter YdjK	4763752.0
1	1					236	sim3	1936457	259	sim3	35	IS30_IS30	1936457	1937677.0	NC_000913.3_art_ISs	1935956.0	1936456.0		1937678.0	1938178.0	NC_000913.3	1893221.0				1894222.0	IS only present in query Strain.	1. DLIS	Complete IS hit.	b1808	putative 5' to 3' DNA helicase implicated in DNA repair	b1810	DUF1889 domain-containing protein YoaC	b1808	putative 5' to 3' DNA helicase implicated in DNA repair	b1810	DUF1889 domain-containing protein YoaC	4763752.0
1	1					237	sim3	2017556	260	sim3	36	IS30_IS30	2017556	2018776.0	NC_000913.3_art_ISs	2017055.0	2017555.0		2018777.0	2019277.0	NC_000913.3	1973099.0				1974100.0	IS only present in query Strain.	1. DLIS	Complete IS hit.	b1887	chemotaxis protein CheW	-	Intergenic/Pseudo/Repeaed Region	b1887	chemotaxis protein CheW	b1888	chemotaxis protein CheA	4763752.0
1	1					238	sim3	2044316	261	sim3	37	IS30_IS30	2044316	2045536.0	NC_000913.3_art_ISs	2043815.0	2044315.0		2045537.0	2046037.0	NC_000913.3	1998638.0				1999639.0	IS only present in query Strain.	1. DLIS	Complete IS hit.	-	Intergenic/Pseudo/Repeaed Region	b1920	cystine ABC transporter periplasmic binding protein	b1919	D-cysteine desulfhydrase	b1920	cystine ABC transporter periplasmic binding protein	4763752.0
1	1					239	sim3	2081486	262	sim3	38	IS30_IS30	2081486	2082706.0	NC_000913.3_art_ISs	2080985.0	2081485.0		2082707.0	2083207.0	NC_000913.3	2034587.0				2035588.0	IS only present in query Strain.	1. DLIS	Complete IS hit.	-	Intergenic/Pseudo/Repeaed Region	-	Intergenic/Pseudo/Repeaed Region	b4496	putative outer membrane protein YedS; N-terminal fragment	-	Intergenic/Pseudo/Repeaed Region	4763752.0
1	1					240	sim3	2158747	263	sim3	39	IS30_IS30	2158747	2159967.0	NC_000913.3_art_ISs	2158246.0	2158746.0		2159968.0	2160468.0	NC_000913.3	2110627.0				2111628.0	IS only present in query Strain.	1. DLIS	Complete IS hit.	b2039	dTDP-glucose pyrophosphorylase	-	Intergenic/Pseudo/Repeaed Region	b2039	dTDP-glucose pyrophosphorylase	b2040	dTDP-4-dehydrorhamnose reductase	4763752.0
1	1					241	sim3	2200710	264	sim3	40	IS30_IS30	2200710	2201930.0	NC_000913.3_art_ISs	2200209.0	2200709.0		2201931.0	2202431.0	NC_000913.3	2151369.0				2152370.0	IS only present in query Strain.	1. DLIS	Complete IS hit.	b2071	DUF2314 domain-containing protein YegJ	-	Intergenic/Pseudo/Repeaed Region	b2071	DUF2314 domain-containing protein YegJ	b2072	protein-serine/threonine phosphatase PphC	4763752.0
1	1					242	sim3	2245781	265	sim3	41	IS30_IS30	2245781	2247001.0	NC_000913.3_art_ISs	2245280.0	2245780.0		2247002.0	2247502.0	NC_000913.3	2195219.0				2196220.0	IS only present in query Strain.	1. DLIS	Complete IS hit.	-	Intergenic/Pseudo/Repeaed Region	-	Intergenic/Pseudo/Repeaed Region	b2114	methionine--tRNA ligase	b2114	methionine--tRNA ligase	4763752.0
1	1					243	sim3	2321969	266	sim3	42	IS30_IS30	2321969	2323189.0	NC_000913.3_art_ISs	2321468.0	2321968.0		2323190.0	2323690.0	NC_000913.3	2270186.0				2271187.0	IS only present in query Strain.	1. DLIS	Complete IS hit.	b2175	peptidoglycan DD-endopeptidase/peptidoglycan LD-carboxypeptidase	b2176	putative c-di-GMP phosphodiesterase PdeN	b2175	peptidoglycan DD-endopeptidase/peptidoglycan LD-carboxypeptidase	b2176	putative c-di-GMP phosphodiesterase PdeN	4763752.0
1	1					244	sim3	2332835	267	sim3	43	IS30_IS30	2332835	2334055.0	NC_000913.3_art_ISs	2332334.0	2332834.0		2334056.0	2334556.0	NC_000913.3	2279831.0				2280832.0	IS only present in query Strain.	1. DLIS	Complete IS hit.	-	Intergenic/Pseudo/Repeaed Region	b2184	putative DNA repair helicase RadD	b2183	16S rRNA pseudouridine(516) synthase	b2184	putative DNA repair helicase RadD	4763752.0
1	1					245	sim3	2404428	268	sim3	44	IS30_IS30	2404428	2405648.0	NC_000913.3_art_ISs	2403927.0	2404427.0		2405649.0	2406149.0	NC_000913.3	2350203.0				2351204.0	IS only present in query Strain.	1. DLIS	Complete IS hit.	-	Intergenic/Pseudo/Repeaed Region	b2240	sn-glycerol 3-phosphate:phosphate antiporter	b2239	glycerophosphoryl diester phosphodiesterase	b2240	sn-glycerol 3-phosphate:phosphate antiporter	4763752.0
1	1					246	sim3	2413613	269	sim3	45	IS30_IS30	2413613	2414833.0	NC_000913.3_art_ISs	2413112.0	2413612.0		2414834.0	2415334.0	NC_000913.3	2358167.0				2359168.0	IS only present in query Strain.	1. DLIS	Complete IS hit.	-	Intergenic/Pseudo/Repeaed Region	b2246	putative transporter YfaV	b2245	2-keto-3-deoxy-L-rhamnonate aldolase	b2246	putative transporter YfaV	4763752.0
1	1					247	sim3	2456482	270	sim3	46	IS30_IS30	2456482	2457702.0	NC_000913.3_art_ISs	2455981.0	2456481.0		2457703.0	2458203.0	NC_000913.3	2399815.0				2400816.0	IS only present in query Strain.	1. DLIS	Complete IS hit.	b2283	NADH:quinone oxidoreductase subunit G	-	Intergenic/Pseudo/Repeaed Region	b2283	NADH:quinone oxidoreductase subunit G	b2284	NADH:quinone oxidoreductase subunit F	4763752.0
1	1					248	sim3	2484594	271	sim3	47	IS30_IS30	2484594	2485814.0	NC_000913.3_art_ISs	2484093.0	2484593.0		2485815.0	2486315.0	NC_000913.3	2426706.0				2427707.0	IS only present in query Strain.	1. DLIS	Complete IS hit.	b2309	histidine ABC transporter periplasmic binding protein	-	Intergenic/Pseudo/Repeaed Region	b2309	histidine ABC transporter periplasmic binding protein	b2310	lysine/arginine/ornithine ABC transporter periplasmic binding protein	4763752.0
1	1					249	sim3	2489386	272	sim3	48	IS30_IS30	2489386	2490606.0	NC_000913.3_art_ISs	2488885.0	2489385.0		2490607.0	2491107.0	NC_000913.3	2430277.0				2431278.0	IS only present in query Strain.	1. DLIS	Complete IS hit.	b2313	colicin V production protein	b2314	cell division protein DedD	b2313	colicin V production protein	b2314	cell division protein DedD	4763752.0
1	1					250	sim3	2675772	273	sim3	49	IS30_IS30	2675772	2676992.0	NC_000913.3_art_ISs	2675271.0	2675771.0		2676993.0	2677493.0	NC_000913.3	2615442.0				2616443.0	IS only present in query Strain.	1. DLIS	Complete IS hit.	b2493	putative transporter YfgO	b2494	beta-barrel assembly-enhancing protease	b2493	putative transporter YfgO	b2494	beta-barrel assembly-enhancing protease	4763752.0
1	1					251	sim3	2692331	274	sim3	50	IS30_IS30	2692331	2693551.0	NC_000913.3_art_ISs	2691830.0	2692330.0		2693552.0	2694052.0	NC_000913.3	2630780.0				2631781.0	IS only present in query Strain.	1. DLIS	Complete IS hit.	b2506	nalidixic acid resistance protein YfgI	-	Intergenic/Pseudo/Repeaed Region	b2506	nalidixic acid resistance protein YfgI	b2507	GMP synthetase	4763752.0
1	1					252	sim3	2700916	275	sim3	51	IS30_IS30	2700916	2702136.0	NC_000913.3_art_ISs	2700415.0	2700915.0		2702137.0	2702637.0	NC_000913.3	2638144.0				2639145.0	IS only present in query Strain.	1. DLIS	Complete IS hit.	-	Intergenic/Pseudo/Repeaed Region	b2513	ancillary SecYEG translocon subunit	b2512	outer membrane protein assembly factor BamB	b2513	ancillary SecYEG translocon subunit	4763752.0
1	1					253	sim3	2743671	276	sim3	52	IS30_IS30	2743671	2744891.0	NC_000913.3_art_ISs	2743170.0	2743670.0		2744892.0	2745392.0	NC_000913.3	2679678.0				2680679.0	IS only present in query Strain.	1. DLIS	Complete IS hit.	-	Intergenic/Pseudo/Repeaed Region	-	Intergenic/Pseudo/Repeaed Region	b2549	DUF5107 domain-containing protein YphG	b2549	DUF5107 domain-containing protein YphG	4763752.0
1	1					256	sim3	2775736	277	sim3	53	IS30_IS30	2775736	2776956.0	NC_000913.3_art_ISs	2775235.0	2775735.0		2776957.0	2777457.0	NC_000913.3	2708080.0				2709081.0	IS only present in query Strain.	1. DLIS	Complete IS hit.	-	Intergenic/Pseudo/Repeaed Region	b2572	anti-sigma factor	b2571	anti-sigma factor stabilizing protein RseB	b2572	anti-sigma factor	4763752.0
1	1					257	sim3	2791595	278	sim3	54	IS30_IS30	2791595	2792815.0	NC_000913.3_art_ISs	2791094.0	2791594.0		2792816.0	2793316.0	NC_000913.3	2722718.0				2723719.0	IS only present in query Strain.	1. DLIS	Complete IS hit.	-	Intergenic/Pseudo/Repeaed Region	-	Intergenic/Pseudo/Repeaed Region	-	Intergenic/Pseudo/Repeaed Region	b2585	phosphatidylserine synthase	4763752.0
1	1					258	sim3	2794455	279	sim3	55	IS30_IS30	2794455	2795675.0	NC_000913.3_art_ISs	2793954.0	2794454.0		2795676.0	2796176.0	NC_000913.3	2724357.0				2725358.0	IS only present in query Strain.	1. DLIS	Complete IS hit.	b2586	protein YfiM	-	Intergenic/Pseudo/Repeaed Region	b2586	protein YfiM	b2587	alpha-ketoglutarate:H(+) symporter	4763752.0
1	1					259	sim3	2944211	280	sim3	56	IS30_IS30	2944211	2945431.0	NC_000913.3_art_ISs	2943710.0	2944210.0		2945432.0	2945932.0	NC_000913.3	2872892.0				2873893.0	IS only present in query Strain.	1. DLIS	Complete IS hit.	-	Intergenic/Pseudo/Repeaed Region	-	Intergenic/Pseudo/Repeaed Region	-	Intergenic/Pseudo/Repeaed Region	b2750	adenylyl-sulfate kinase	4763752.0
1	1					260	sim3	2969638	281	sim3	57	IS30_IS30	2969638	2970858.0	NC_000913.3_art_ISs	2969137.0	2969637.0		2970859.0	2971359.0	NC_000913.3	2897098.0				2898099.0	IS only present in query Strain.	1. DLIS	Complete IS hit.	-	Intergenic/Pseudo/Repeaed Region	b4463	putative FAD-containing dehydrogenase	b2771	putative transporter YgcS	b4463	putative FAD-containing dehydrogenase	4763752.0
1	1					261	sim3	2981293	282	sim3	58	IS30_IS30	2981293	2982513.0	NC_000913.3_art_ISs	2980792.0	2981292.0		2982514.0	2983014.0	NC_000913.3	2907532.0				2908533.0	IS only present in query Strain.	1. DLIS	Complete IS hit.	b2779	enolase	-	Intergenic/Pseudo/Repeaed Region	b2779	enolase	b2780	CTP synthetase	4763752.0
1	1					262	sim3	3007911	283	sim3	59	IS30_IS30	3007911	3009131.0	NC_000913.3_art_ISs	3007410.0	3007910.0		3009132.0	3009632.0	NC_000913.3	2932929.0				2933930.0	IS only present in query Strain.	1. DLIS	Complete IS hit.	b2799	L-1;2-propanediol oxidoreductase	-	Intergenic/Pseudo/Repeaed Region	b2799	L-1;2-propanediol oxidoreductase	-	Intergenic/Pseudo/Repeaed Region	4763752.0
1	1					263	sim3	3071039	284	sim3	60	IS30_IS30	3071039	3072259.0	NC_000913.3_art_ISs	3070538.0	3071038.0		3072260.0	3072760.0	NC_000913.3	2994836.0				2995837.0	IS only present in query Strain.	1. DLIS	Complete IS hit.	b2855	putative DNA-binding transcriptional regulator YgeK	-	Intergenic/Pseudo/Repeaed Region	b2855	putative DNA-binding transcriptional regulator YgeK	b2858	putative type III secretion system protein	4763752.0
1	1					264	sim3	3151073	285	sim3	61	IS30_IS30	3151073	3152293.0	NC_000913.3_art_ISs	3150572.0	3151072.0		3152294.0	3152794.0	NC_000913.3	3073649.0				3074650.0	IS only present in query Strain.	1. DLIS	Complete IS hit.	b2927	D-erythrose-4-phosphate dehydrogenase	-	Intergenic/Pseudo/Repeaed Region	b2927	D-erythrose-4-phosphate dehydrogenase	b2928	P-loop NTPase domain-containing protein YggC	4763752.0
1	1					265	sim3	3190441	286	sim3	62	IS30_IS30	3190441	3191661.0	NC_000913.3_art_ISs	3189940.0	3190440.0		3191662.0	3192162.0	NC_000913.3	3111796.0				3112797.0	IS only present in query Strain.	1. DLIS	Complete IS hit.	b2969	putative type II secretion system L-type protein	-	Intergenic/Pseudo/Repeaed Region	b2969	putative type II secretion system L-type protein	b2970	putative type II secretion system C-type protein	4763752.0
1	1					266	sim3	3254892	287	sim3	63	IS30_IS30	3254892	3256112.0	NC_000913.3_art_ISs	3254391.0	3254891.0		3256113.0	3256613.0	NC_000913.3	3175026.0				3176027.0	IS only present in query Strain.	1. DLIS	Complete IS hit.	b3030	DNA topoisomerase IV subunit B	b3032	cAMP phosphodiesterase	b3030	DNA topoisomerase IV subunit B	b3032	cAMP phosphodiesterase	4763752.0
1	1					267	sim3	3289760	288	sim3	64	IS30_IS30	3289760	3290980.0	NC_000913.3_art_ISs	3289259.0	3289759.0		3290981.0	3291481.0	NC_000913.3	3208673.0				3209674.0	IS only present in query Strain.	1. DLIS	Complete IS hit.	-	Intergenic/Pseudo/Repeaed Region	b3064	N(6)-L-threonylcarbamoyladenine synthase; TsaD subunit	b3063	L-tartrate:succinate antiporter	b3064	N(6)-L-threonylcarbamoyladenine synthase; TsaD subunit	4763752.0
1	1					268	sim3	3308990	289	sim3	65	IS30_IS30	3308990	3310210.0	NC_000913.3_art_ISs	3308489.0	3308989.0		3310211.0	3310711.0	NC_000913.3	3226682.0				3227683.0	IS only present in query Strain.	1. DLIS	Complete IS hit.	-	Intergenic/Pseudo/Repeaed Region	-	Intergenic/Pseudo/Repeaed Region	b3078	putative transporter YgjI	-	Intergenic/Pseudo/Repeaed Region	4763752.0
1	1					269	sim3	3343918	290	sim3	66	IS30_IS30	3343918	3345138.0	NC_000913.3_art_ISs	3343417.0	3343917.0		3345139.0	3345639.0	NC_000913.3	951540.0				952538.0	IS only present in query Strain.	1. DLIS	Complete IS hit.	-	Intergenic/Pseudo/Repeaed Region	-	Intergenic/Pseudo/Repeaed Region	b0903	pyruvate formate-lyase	b0903	pyruvate formate-lyase	4763752.0
1	1					270	sim3	3365258	291	sim3	67	IS30_IS30	3365258	3366478.0	NC_000913.3_art_ISs	3364757.0	3365257.0		3366479.0	3366979.0	NC_000913.3	3280508.0				3281509.0	IS only present in query Strain.	1. DLIS	Complete IS hit.	b3133	N-acetyl-D-galactosamine specific PTS enzyme IIB component	b3135	putative truncated N-acetylgalactosamine-6-phosphate deacetylase	b3133	N-acetyl-D-galactosamine specific PTS enzyme IIB component	b3135	putative truncated N-acetylgalactosamine-6-phosphate deacetylase	4763752.0
1	1					271	sim3	3398863	292	sim3	68	IS30_IS30	3398863	3400083.0	NC_000913.3_art_ISs	3398362.0	3398862.0		3400084.0	3400584.0	NC_000913.3	3312892.0				3313893.0	IS only present in query Strain.	1. DLIS	Complete IS hit.	b3167	30S ribosome binding factor	-	Intergenic/Pseudo/Repeaed Region	b3167	30S ribosome binding factor	b3168	translation initiation factor IF-2	4763752.0
1	1					272	sim3	3430284	293	sim3	69	IS30_IS30	3430284	3431504.0	NC_000913.3_art_ISs	3429783.0	3430283.0		3431505.0	3432005.0	NC_000913.3	3343092.0				3344093.0	IS only present in query Strain.	1. DLIS	Complete IS hit.	b3199	lipopolysaccharide transport system protein LptC	b3201	lipopolysaccharide transport system ATP binding protein	b3199	lipopolysaccharide transport system protein LptC	b3201	lipopolysaccharide transport system ATP binding protein	4763752.0
1	1					273	sim3	3439374	294	sim3	70	IS30_IS30	3439374	3440594.0	NC_000913.3_art_ISs	3438873.0	3439373.0		3440595.0	3441095.0	NC_000913.3	3350961.0				3351962.0	IS only present in query Strain.	1. DLIS	Complete IS hit.	-	Intergenic/Pseudo/Repeaed Region	-	Intergenic/Pseudo/Repeaed Region	b3210	sensory histidine kinase ArcB	b3210	sensory histidine kinase ArcB	4763752.0
1	1					274	sim3	3520936	295	sim3	71	IS30_IS30	3520936	3522156.0	NC_000913.3_art_ISs	3520435.0	3520935.0		3522157.0	3522657.0	NC_000913.3	3431302.0				3432303.0	IS only present in query Strain.	1. DLIS	Complete IS hit.	b3282	threonylcarbamoyl-AMP synthase	b3284	DUF494 domain-containing protein Smg	b3282	threonylcarbamoyl-AMP synthase	b3284	DUF494 domain-containing protein Smg	4763752.0
1	1					275	sim3	3539631	296	sim3	72	IS30_IS30	3539631	3540851.0	NC_000913.3_art_ISs	3539130.0	3539630.0		3540852.0	3541352.0	NC_000913.3	3448776.0				3449777.0	IS only present in query Strain.	1. DLIS	Complete IS hit.	b3313	50S ribosomal subunit protein L16	-	Intergenic/Pseudo/Repeaed Region	b3313	50S ribosomal subunit protein L16	b3314	30S ribosomal subunit protein S3	4763752.0
1	1					276	sim3	3548482	297	sim3	73	IS30_IS30	3548482	3549702.0	NC_000913.3_art_ISs	3547981.0	3548481.0		3549703.0	3550203.0	NC_000913.3	3456406.0				3457407.0	IS only present in query Strain.	1. DLIS	Complete IS hit.	-	Intergenic/Pseudo/Repeaed Region	-	Intergenic/Pseudo/Repeaed Region	b3325	Type II secretion system protein GspD	b3325	Type II secretion system protein GspD	4763752.0
1	1					277	sim3	3577842	298	sim3	74	IS30_IS30	3577842	3579062.0	NC_000913.3_art_ISs	3577341.0	3577841.0		3579063.0	3579563.0	NC_000913.3	3484545.0				3485546.0	IS only present in query Strain.	1. DLIS	Complete IS hit.	-	Intergenic/Pseudo/Repeaed Region	b3356	OsmC family protein	b3355	putative phosphoribulokinase	b3356	OsmC family protein	4763752.0
1	1					278	sim3	3610435	299	sim3	75	IS30_IS30	3610435	3611655.0	NC_000913.3_art_ISs	3609934.0	3610434.0		3611656.0	3612156.0	NC_000913.3	3515917.0				3516918.0	IS only present in query Strain.	1. DLIS	Complete IS hit.	-	Intergenic/Pseudo/Repeaed Region	-	Intergenic/Pseudo/Repeaed Region	-	Intergenic/Pseudo/Repeaed Region	b3388	cell division protein DamX	4763752.0
1	1					279	sim3	3617327	300	sim3	76	IS30_IS30	3617327	3618547.0	NC_000913.3_art_ISs	3616826.0	3617326.0		3618548.0	3619048.0	NC_000913.3	3521588.0				3522589.0	IS only present in query Strain.	1. DLIS	Complete IS hit.	b3394	DNA utilization protein HofN	-	Intergenic/Pseudo/Repeaed Region	b3394	DNA utilization protein HofN	b3395	DNA utilization protein HofM	4763752.0
1	1					280	sim3	3653463	301	sim3	77	IS30_IS30	3653463	3654683.0	NC_000913.3_art_ISs	3652962.0	3653462.0		3654684.0	3655184.0	NC_000913.3	3556503.0				3557504.0	IS only present in query Strain.	1. DLIS	Complete IS hit.	b4475	RNA 3'-terminal phosphate cyclase	-	Intergenic/Pseudo/Repeaed Region	b4475	RNA 3'-terminal phosphate cyclase	b3421	RNA-splicing ligase	4763752.0
1	1					281	sim3	3710579	302	sim3	78	IS30_IS30	3710579	3711799.0	NC_000913.3_art_ISs	3710078.0	3710578.0		3711800.0	3712300.0	NC_000913.3	3612398.0				3613399.0	IS only present in query Strain.	1. DLIS	Complete IS hit.	-	Intergenic/Pseudo/Repeaed Region	b3475	holo-[acyl carrier protein] synthase 2	b3474	putative transporter YhhT	b3475	holo-[acyl carrier protein] synthase 2	4763752.0
1	1					282	sim3	3805188	303	sim3	79	IS30_IS30	3805188	3806408.0	NC_000913.3_art_ISs	3804687.0	3805187.0		3806409.0	3806909.0	NC_000913.3	3705786.0				3706787.0	IS only present in query Strain.	1. DLIS	Complete IS hit.	b3543	dipeptide ABC transporter membrane subunit DppB	-	Intergenic/Pseudo/Repeaed Region	b3543	dipeptide ABC transporter membrane subunit DppB	b3544	dipeptide ABC transporter periplasmic binding protein	4763752.0
1	1					283	sim3	3836208	304	sim3	80	IS30_IS30	3836208	3837428.0	NC_000913.3_art_ISs	3835707.0	3836207.0		3837429.0	3837929.0	NC_000913.3	3735585.0				3736586.0	IS only present in query Strain.	1. DLIS	Complete IS hit.	-	Intergenic/Pseudo/Repeaed Region	b3570	putative glycoside hydrolase Bax	b3569	DNA-binding transcriptional dual regulator XylR	b3570	putative glycoside hydrolase Bax	4763752.0
1	1					284	sim3	3861386	305	sim3	81	IS30_IS30	3861386	3862606.0	NC_000913.3_art_ISs	3860885.0	3861385.0		3862607.0	3863107.0	NC_000913.3	3759542.0				3760543.0	IS only present in query Strain.	1. DLIS	Complete IS hit.	b3590	selenocysteyl-tRNA-specific translation elongation factor	-	Intergenic/Pseudo/Repeaed Region	b3590	selenocysteyl-tRNA-specific translation elongation factor	b3591	selenocysteine synthase	4763752.0
1	1					285	sim3	3946052	306	sim3	82	IS30_IS30	3946052	3947272.0	NC_000913.3_art_ISs	3945551.0	3946051.0		3947273.0	3947773.0	NC_000913.3	3842987.0				3843988.0	IS only present in query Strain.	1. DLIS	Complete IS hit.	-	Intergenic/Pseudo/Repeaed Region	b3665	adenine deaminase	b3664	adenine transporter	b3665	adenine deaminase	4763752.0
1	1					286	sim3	3978372	307	sim3	83	IS30_IS30	3978372	3979592.0	NC_000913.3_art_ISs	3977871.0	3978371.0		3979593.0	3980093.0	NC_000913.3	3874086.0				3875087.0	IS only present in query Strain.	1. DLIS	Complete IS hit.	b3693	2-dehydro-3-deoxygalactonokinase	-	Intergenic/Pseudo/Repeaed Region	b3693	2-dehydro-3-deoxygalactonokinase	b4479	putative DNA-binding transcriptional regulator DgoR	4763752.0
1	1					287	sim3	4149779	308	sim3	84	IS30_IS30	4149779	4150999.0	NC_000913.3_art_ISs	4149278.0	4149778.0		4151000.0	4151500.0	NC_000913.3	4044272.0				4045273.0	IS only present in query Strain.	1. DLIS	Complete IS hit.	-	Intergenic/Pseudo/Repeaed Region	-	Intergenic/Pseudo/Repeaed Region	b3861	uncharacterized protein YihF	b3861	uncharacterized protein YihF	4763752.0
1	1					288	sim3	4174122	309	sim3	85	IS30_IS30	4174122	4175342.0	NC_000913.3_art_ISs	4173621.0	4174121.0		4175343.0	4175843.0	NC_000913.3	4067394.0				4068395.0	IS only present in query Strain.	1. DLIS	Complete IS hit.	-	Intergenic/Pseudo/Repeaed Region	-	Intergenic/Pseudo/Repeaed Region	b3878	sulfoquinovosidase	b3878	sulfoquinovosidase	4763752.0
1	1					289	sim3	4255873	310	sim3	86	IS30_IS30	4255873	4257093.0	NC_000913.3_art_ISs	4255372.0	4255872.0		4257094.0	4257594.0	NC_000913.3	4147924.0				4148925.0	IS only present in query Strain.	1. DLIS	Complete IS hit.	b3954	putative DNA-binding transcriptional regulator YijO	-	Intergenic/Pseudo/Repeaed Region	b3954	putative DNA-binding transcriptional regulator YijO	b3955	phosphoethanolamine transferase EptC	4763752.0
1	1					290	sim3	4257886	311	sim3	87	IS30_IS30	4257886	4259106.0	NC_000913.3_art_ISs	4257385.0	4257885.0		4259107.0	4259607.0	NC_000913.3	4148716.0				4149717.0	IS only present in query Strain.	1. DLIS	Complete IS hit.	-	Intergenic/Pseudo/Repeaed Region	-	Intergenic/Pseudo/Repeaed Region	b3955	phosphoethanolamine transferase EptC	b3955	phosphoethanolamine transferase EptC	4763752.0
1	1					291	sim3	4283254	312	sim3	88	IS30_IS30	4283254	4284474.0	NC_000913.3_art_ISs	4282753.0	4283253.0		4284475.0	4284975.0	NC_000913.3	4172863.0				4173864.0	IS only present in query Strain.	1. DLIS	Complete IS hit.	b3972	UDP-N-acetylenolpyruvoylglucosamine reductase	-	Intergenic/Pseudo/Repeaed Region	b3972	UDP-N-acetylenolpyruvoylglucosamine reductase	b3973	DNA-binding transcriptional repressor/biotin-[acetyl-CoA-carboxylase] ligase BirA	4763752.0
1	1					292	sim3	4329380	313	sim3	89	IS30_IS30	4329380	4330600.0	NC_000913.3_art_ISs	4328879.0	4329379.0		4330601.0	4331101.0	NC_000913.3	4217768.0				4218769.0	IS only present in query Strain.	1. DLIS	Complete IS hit.	-	Intergenic/Pseudo/Repeaed Region	b4016	isocitrate dehydrogenase kinase/phosphatase	b4015	isocitrate lyase	b4016	isocitrate dehydrogenase kinase/phosphatase	4763752.0
1	1					293	sim3	4347975	314	sim3	90	IS30_IS30	4347975	4349195.0	NC_000913.3_art_ISs	4347474.0	4347974.0		4349196.0	4349696.0	NC_000913.3	4235142.0				4236143.0	IS only present in query Strain.	1. DLIS	Complete IS hit.	b4025	glucose-6-phosphate isomerase	b4026	uncharacterized protein YjbE	b4025	glucose-6-phosphate isomerase	b4026	uncharacterized protein YjbE	4763752.0
1	1					294	sim3	4418330	315	sim3	91	IS30_IS30	4418330	4419550.0	NC_000913.3_art_ISs	4417829.0	4418329.0		4419551.0	4420051.0	NC_000913.3	4304276.0				4305277.0	IS only present in query Strain.	1. DLIS	Complete IS hit.	b4622	putative lipoprotein YtcA	-	Intergenic/Pseudo/Repeaed Region	b4622	putative lipoprotein YtcA	b4083	alkyl sulfatase	4763752.0
1	1					295	sim3	4450717	316	sim3	92	IS30_IS30	4450717	4451937.0	NC_000913.3_art_ISs	4450216.0	4450716.0		4451938.0	4452438.0	NC_000913.3	4335442.0				4336443.0	IS only present in query Strain.	1. DLIS	Complete IS hit.	b4114	phosphoethanolamine transferase EptA	-	Intergenic/Pseudo/Repeaed Region	b4114	phosphoethanolamine transferase EptA	b4115	arginine:agmatine antiporter	4763752.0
1	1					296	sim3	4465752	317	sim3	93	IS30_IS30	4465752	4466972.0	NC_000913.3_art_ISs	4465251.0	4465751.0		4466973.0	4467473.0	NC_000913.3	4349256.0				4350257.0	IS only present in query Strain.	1. DLIS	Complete IS hit.	-	Intergenic/Pseudo/Repeaed Region	b4125	sensory histidine kinase DcuS	-	Intergenic/Pseudo/Repeaed Region	b4125	sensory histidine kinase DcuS	4763752.0
1	1					297	sim3	4469622	318	sim3	94	IS30_IS30	4469622	4470842.0	NC_000913.3_art_ISs	4469121.0	4469621.0		4470843.0	4471343.0	NC_000913.3	4351905.0				4352906.0	IS only present in query Strain.	1. DLIS	Complete IS hit.	b4126	PF06902 family protein YjdI	-	Intergenic/Pseudo/Repeaed Region	b4126	PF06902 family protein YjdI	-	Intergenic/Pseudo/Repeaed Region	4763752.0
1	1					298	sim3	4629997	319	sim3	95	IS30_IS30	4629997	4631217.0	NC_000913.3_art_ISs	4629496.0	4629996.0		4631218.0	4631718.0	NC_000913.3	4511059.0				4512060.0	IS only present in query Strain.	1. DLIS	Complete IS hit.	b4287	ferric citrate ABC transporter ATP binding subunit	-	Intergenic/Pseudo/Repeaed Region	b4287	ferric citrate ABC transporter ATP binding subunit	b4288	ferric citrate ABC transporter membrane subunit FecD	4763752.0
1	1					299	sim3	4635383	320	sim3	96	IS30_IS30	4635383	4636603.0	NC_000913.3_art_ISs	4634882.0	4635382.0		4636604.0	4637104.0	NC_000913.3	4515224.0				4516225.0	IS only present in query Strain.	1. DLIS	Complete IS hit.	-	Intergenic/Pseudo/Repeaed Region	-	Intergenic/Pseudo/Repeaed Region	b4291	ferric citrate outer membrane transporter	b4291	ferric citrate outer membrane transporter	4763752.0
1	1					300	sim3	4639958	321	sim3	97	IS30_IS30	4639958	4641178.0	NC_000913.3_art_ISs	4639457.0	4639957.0		4641179.0	4641679.0	NC_000913.3	4518578.0				4519579.0	IS only present in query Strain.	1. DLIS	Complete IS hit.	b4294	KpLE2 phage-like element; IS1 repressor protein InsA	b4295	KpLE2 phage-like element; putative DNA-binding transcriptional regulator YjhU	b4294	KpLE2 phage-like element; IS1 repressor protein InsA	b4295	KpLE2 phage-like element; putative DNA-binding transcriptional regulator YjhU	4763752.0
1	1					301	sim4	36346	327	sim4	0	IS30_IS30	36346	37566.0	NC_000913.3_art_ISs	35845.0	36345.0		37567.0	38067.0	NC_000913.3	35845.0				36846.0	IS only present in query Strain.	1. DLIS	Complete IS hit.	b0036	crotonobetainyl-CoA hydratase	-	Intergenic/Pseudo/Repeaed Region	b0036	crotonobetainyl-CoA hydratase	b0037	carnitine-CoA ligase	4763752.0
1	1					302	sim4	119770	328	sim4	1	IS30_IS30	119770	120990.0	NC_000913.3_art_ISs	119269.0	119769.0		120991.0	121491.0	NC_000913.3	118048.0				119049.0	IS only present in query Strain.	1. DLIS	Complete IS hit.	-	Intergenic/Pseudo/Repeaed Region	b0110	1;6-anhydro-N-acetylmuramoyl-L-alanine amidase	b0109	quinolinate phosphoribosyltransferase (decarboxylating)	b0110	1;6-anhydro-N-acetylmuramoyl-L-alanine amidase	4763752.0
1	1					303	sim4	218169	329	sim4	2	IS30_IS30	218169	219389.0	NC_000913.3_art_ISs	217668.0	218168.0		219390.0	219890.0	NC_000913.3	215226.0				216227.0	IS only present in query Strain.	1. DLIS	Complete IS hit.	b0191	peptidyl-tRNA hydrolase; ribosome rescue factor	b0193	peptidase C92 family protein	b0191	peptidyl-tRNA hydrolase; ribosome rescue factor	b0193	peptidase C92 family protein	4763752.0
1	1					304	sim4	238030	330	sim4	3	IS30_IS30	238030	239250.0	NC_000913.3_art_ISs	237529.0	238029.0		239251.0	239751.0	NC_000913.3	233866.0				234867.0	IS only present in query Strain.	1. DLIS	Complete IS hit.	b0211	membrane-bound lytic murein transglycosylase D	b0213	putative S-adenosyl-L-methionine-dependent methyltransferase	b0211	membrane-bound lytic murein transglycosylase D	b0213	putative S-adenosyl-L-methionine-dependent methyltransferase	4763752.0
1	1					305	sim4	353912	331	sim4	4	IS30_IS30	353912	355132.0	NC_000913.3_art_ISs	353411.0	353911.0		355133.0	355633.0	NC_000913.3	348527.0				349528.0	IS only present in query Strain.	1. DLIS	Complete IS hit.	-	Intergenic/Pseudo/Repeaed Region	-	Intergenic/Pseudo/Repeaed Region	-	Intergenic/Pseudo/Repeaed Region	b0331	2-methylisocitrate lyase	4763752.0
1	1					306	sim4	370195	332	sim4	5	IS30_IS30	370195	371415.0	NC_000913.3_art_ISs	369694.0	370194.0		371416.0	371916.0	NC_000913.3	363589.0				364590.0	IS only present in query Strain.	1. DLIS	Complete IS hit.	-	Intergenic/Pseudo/Repeaed Region	-	Intergenic/Pseudo/Repeaed Region	b0344	beta-galactosidase	b0344	beta-galactosidase	4763752.0
1	1					307	sim4	390933	333	sim4	6	IS30_IS30	390933	392153.0	NC_000913.3_art_ISs	390432.0	390932.0		392154.0	392654.0	NC_000913.3	383106.0				384107.0	IS only present in query Strain.	1. DLIS	Complete IS hit.	-	Intergenic/Pseudo/Repeaed Region	b0364	putative deacetylase YaiS	b0363	putative glucosyltransferase	b0364	putative deacetylase YaiS	4763752.0
1	1					308	sim4	488699	334	sim4	7	IS30_IS30	488699	489919.0	NC_000913.3_art_ISs	488198.0	488698.0		489920.0	490420.0	NC_000913.3	479651.0				480652.0	IS only present in query Strain.	1. DLIS	Complete IS hit.	b0459	maltose O-acetyltransferase	b0461	protein that modulates Hha toxicity	b0459	maltose O-acetyltransferase	b0461	protein that modulates Hha toxicity	4763752.0
1	1					309	sim4	491126	335	sim4	8	IS30_IS30	491126	492346.0	NC_000913.3_art_ISs	490625.0	491125.0		492347.0	492847.0	NC_000913.3	480857.0				481858.0	IS only present in query Strain.	1. DLIS	Complete IS hit.	-	Intergenic/Pseudo/Repeaed Region	-	Intergenic/Pseudo/Repeaed Region	-	Intergenic/Pseudo/Repeaed Region	b0462	multidrug efflux pump RND permease AcrB	4763752.0
1	1					310	sim4	505247	336	sim4	9	IS30_IS30	505247	506467.0	NC_000913.3_art_ISs	504746.0	505246.0		506468.0	506968.0	NC_000913.3	493757.0				494758.0	IS only present in query Strain.	1. DLIS	Complete IS hit.	b0470	DNA polymerase III subunit tau	b0472	DNA repair protein RecR	b0470	DNA polymerase III subunit tau	b0472	DNA repair protein RecR	4763752.0
1	1					311	sim4	587166	337	sim4	10	IS30_IS30	587166	588386.0	NC_000913.3_art_ISs	586665.0	587165.0		588387.0	588887.0	NC_000913.3	574455.0				575456.0	IS only present in query Strain.	1. DLIS	Complete IS hit.	-	Intergenic/Pseudo/Repeaed Region	-	Intergenic/Pseudo/Repeaed Region	-	Intergenic/Pseudo/Repeaed Region	b0552	DLP12 prophage; IS5 transposase and trans-activator	4763752.0
1	1					312	sim4	599438	338	sim4	11	IS30_IS30	599438	600658.0	NC_000913.3_art_ISs	598937.0	599437.0		600659.0	601159.0	NC_000913.3	585506.0				586507.0	IS only present in query Strain.	1. DLIS	Complete IS hit.	b0565	outer membrane protease VII (outer membrane protein 3b)	b0566	DNA-binding transcriptional activator EnvY	b0565	outer membrane protease VII (outer membrane protein 3b)	b0566	DNA-binding transcriptional activator EnvY	4763752.0
1	1					313	sim4	625518	339	sim4	12	IS30_IS30	625518	626738.0	NC_000913.3_art_ISs	625017.0	625517.0		626739.0	627239.0	NC_000913.3	610365.0				611366.0	IS only present in query Strain.	1. DLIS	Complete IS hit.	-	Intergenic/Pseudo/Repeaed Region	-	Intergenic/Pseudo/Repeaed Region	b0584	ferric enterobactin outer membrane transporter	b0584	ferric enterobactin outer membrane transporter	4763752.0
1	1					314	sim4	748683	340	sim4	13	IS30_IS30	748683	749903.0	NC_000913.3_art_ISs	748182.0	748682.0		749904.0	750404.0	NC_000913.3	732309.0				733310.0	IS only present in query Strain.	1. DLIS	Complete IS hit.	-	Intergenic/Pseudo/Repeaed Region	-	Intergenic/Pseudo/Repeaed Region	b0700	rhs element protein RhsC	b0700	rhs element protein RhsC	4763752.0
1	1					315	sim4	784975	341	sim4	14	IS30_IS30	784975	786195.0	NC_000913.3_art_ISs	784474.0	784974.0		786196.0	786696.0	NC_000913.3	767380.0				768381.0	IS only present in query Strain.	1. DLIS	Complete IS hit.	-	Intergenic/Pseudo/Repeaed Region	-	Intergenic/Pseudo/Repeaed Region	b0731	2-O-alpha-mannosyl-D-glycerate specific PTS enzyme II	b0732	alpha-mannosidase	4763752.0
1	1					316	sim4	787128	342	sim4	15	IS30_IS30	787128	788348.0	NC_000913.3_art_ISs	786627.0	787127.0		788349.0	788849.0	NC_000913.3	768312.0				769313.0	IS only present in query Strain.	1. DLIS	Complete IS hit.	-	Intergenic/Pseudo/Repeaed Region	-	Intergenic/Pseudo/Repeaed Region	b0732	alpha-mannosidase	b0732	alpha-mannosidase	4763752.0
1	1					317	sim4	925978	343	sim4	16	IS30_IS30	925978	927198.0	NC_000913.3_art_ISs	925477.0	925977.0		927199.0	927699.0	NC_000913.3	905941.0				906942.0	IS only present in query Strain.	1. DLIS	Complete IS hit.	-	Intergenic/Pseudo/Repeaed Region	b0869	putative NAD(P)-dependent oxidoreductase YbjT	b0868	putative NAD(P)H-binding oxidoreductase with NAD(P)-binding Rossmann-fold domain	b0869	putative NAD(P)-dependent oxidoreductase YbjT	4763752.0
1	1					318	sim4	941810	344	sim4	17	IS30_IS30	941810	943030.0	NC_000913.3_art_ISs	941309.0	941809.0		943031.0	943531.0	NC_000913.3	920552.0				921553.0	IS only present in query Strain.	1. DLIS	Complete IS hit.	-	Intergenic/Pseudo/Repeaed Region	-	Intergenic/Pseudo/Repeaed Region	b0879	ABC-type tripartite efflux pump ATP binding/membrane subunit	b0879	ABC-type tripartite efflux pump ATP binding/membrane subunit	4763752.0
1	1					319	sim4	949766	345	sim4	18	IS30_IS30	949766	950986.0	NC_000913.3_art_ISs	949265.0	949765.0		950987.0	951487.0	NC_000913.3	927287.0				928288.0	IS only present in query Strain.	1. DLIS	Complete IS hit.	b0885	leucyl/phenylalanyl-tRNA--protein transferase	-	Intergenic/Pseudo/Repeaed Region	b0885	leucyl/phenylalanyl-tRNA--protein transferase	b0886	glutathione/L-cysteine ABC exporter subunit CydC	4763752.0
1	1					320	sim4	952469	346	sim4	19	IS30_IS30	952469	953689.0	NC_000913.3_art_ISs	951968.0	952468.0		953690.0	954190.0	NC_000913.3	928769.0				929770.0	IS only present in query Strain.	1. DLIS	Complete IS hit.	-	Intergenic/Pseudo/Repeaed Region	-	Intergenic/Pseudo/Repeaed Region	b0886	glutathione/L-cysteine ABC exporter subunit CydC	b0887	glutathione/L-cysteine ABC exporter subunit CydD	4763752.0
1	1					321	sim4	957438	347	sim4	20	IS30_IS30	957438	958658.0	NC_000913.3_art_ISs	956937.0	957437.0		958659.0	959159.0	NC_000913.3	932517.0				933518.0	IS only present in query Strain.	1. DLIS	Complete IS hit.	-	Intergenic/Pseudo/Repeaed Region	b0890	cell division DNA translocase FtsK	-	Intergenic/Pseudo/Repeaed Region	b0890	cell division DNA translocase FtsK	4763752.0
1	1					322	sim4	1000174	348	sim4	21	IS30_IS30	1000174	1001394.0	NC_000913.3_art_ISs	999673.0	1000173.0		1001395.0	1001895.0	NC_000913.3	974032.0				975033.0	IS only present in query Strain.	1. DLIS	Complete IS hit.	b0921	tRNA cmo(5)U34 methyltransferase	-	Intergenic/Pseudo/Repeaed Region	b0921	tRNA cmo(5)U34 methyltransferase	b0922	chromosome partitioning protein MukF	4763752.0
1	1					323	sim4	1010069	349	sim4	22	IS30_IS30	1010069	1011289.0	NC_000913.3_art_ISs	1009568.0	1010068.0		1011290.0	1011790.0	NC_000913.3	982706.0				983707.0	IS only present in query Strain.	1. DLIS	Complete IS hit.	b0925	L;D-transpeptidase LdtD	b0927	hydroxyacylglutathione hydrolase GloC	b0925	L;D-transpeptidase LdtD	b0927	hydroxyacylglutathione hydrolase GloC	4763752.0
1	1					324	sim4	1018065	350	sim4	23	IS30_IS30	1018065	1019285.0	NC_000913.3_art_ISs	1017564.0	1018064.0		1019286.0	1019786.0	NC_000913.3	989481.0				990482.0	IS only present in query Strain.	1. DLIS	Complete IS hit.	-	Intergenic/Pseudo/Repeaed Region	-	Intergenic/Pseudo/Repeaed Region	b0931	nicotinate phosphoribosyltransferase	-	Intergenic/Pseudo/Repeaed Region	4763752.0
1	1					325	sim4	1089511	351	sim4	24	IS30_IS30	1089511	1090731.0	NC_000913.3_art_ISs	1089010.0	1089510.0		1090732.0	1091232.0	NC_000913.3	1059706.0				1060707.0	IS only present in query Strain.	1. DLIS	Complete IS hit.	-	Intergenic/Pseudo/Repeaed Region	-	Intergenic/Pseudo/Repeaed Region	b0997	trimethylamine N-oxide reductase 1	b0997	trimethylamine N-oxide reductase 1	4763752.0
1	1					326	sim4	1100198	352	sim4	25	IS30_IS30	1100198	1101418.0	NC_000913.3_art_ISs	1099697.0	1100197.0		1101419.0	1101919.0	NC_000913.3	1069172.0				1070173.0	IS only present in query Strain.	1. DLIS	Complete IS hit.	-	Intergenic/Pseudo/Repeaed Region	b1007	flavin reductase	b1006	pyrimidine:H(+) symporter	b1007	flavin reductase	4763752.0
1	1					327	sim4	1120153	353	sim4	26	IS30_IS30	1120153	1121373.0	NC_000913.3_art_ISs	1119652.0	1120152.0		1121374.0	1121874.0	NC_000913.3	1087906.0				1088907.0	IS only present in query Strain.	1. DLIS	Complete IS hit.	-	Intergenic/Pseudo/Repeaed Region	-	Intergenic/Pseudo/Repeaed Region	b1023	poly-beta-1;6-N-acetyl-D-glucosamine N-deacetylase and beta-1;6 glycoside hydrolase	b1023	poly-beta-1;6-N-acetyl-D-glucosamine N-deacetylase and beta-1;6 glycoside hydrolase	4763752.0
1	1					328	sim4	1273496	354	sim4	27	IS30_IS30	1273496	1274716.0	NC_000913.3_art_ISs	1272995.0	1273495.0		1274717.0	1275217.0	NC_000913.3	1240028.0				1241029.0	IS only present in query Strain.	1. DLIS	Complete IS hit.	-	Intergenic/Pseudo/Repeaed Region	-	Intergenic/Pseudo/Repeaed Region	-	Intergenic/Pseudo/Repeaed Region	b1191	putative K(+):H(+) antiporter	4763752.0
1	1					329	sim4	1359479	355	sim4	28	IS30_IS30	1359479	1360699.0	NC_000913.3_art_ISs	1358978.0	1359478.0		1360700.0	1361200.0	NC_000913.3	1324790.0				1325791.0	IS only present in query Strain.	1. DLIS	Complete IS hit.	-	Intergenic/Pseudo/Repeaed Region	-	Intergenic/Pseudo/Repeaed Region	b1268	DUF2207 domain-containing protein YciQ	b1268	DUF2207 domain-containing protein YciQ	4763752.0
1	1					330	sim4	1388720	356	sim4	29	IS30_IS30	1388720	1389940.0	NC_000913.3_art_ISs	1388219.0	1388719.0		1389941.0	1390441.0	NC_000913.3	1352810.0				1353811.0	IS only present in query Strain.	1. DLIS	Complete IS hit.	-	Intergenic/Pseudo/Repeaed Region	b1292	putrescine ABC exporter membrane protein SapC	b1291	putrescine ABC exporter ATP binding protein SapD	b1292	putrescine ABC exporter membrane protein SapC	4763752.0
1	1					331	sim4	1431482	357	sim4	30	IS30_IS30	1431482	1432702.0	NC_000913.3_art_ISs	1430981.0	1431481.0		1432703.0	1433203.0	NC_000913.3	1394351.0				1395352.0	IS only present in query Strain.	1. DLIS	Complete IS hit.	b1329	murein tripeptide ABC transporter periplasmic binding protein	b1330	small conductance mechanosensitive channel YnaI	b1329	murein tripeptide ABC transporter periplasmic binding protein	b1330	small conductance mechanosensitive channel YnaI	4763752.0
1	1					332	sim4	1485752	358	sim4	31	IS30_IS30	1485752	1486972.0	NC_000913.3_art_ISs	1485251.0	1485751.0		1486973.0	1487473.0	NC_000913.3	1447400.0				1448401.0	IS only present in query Strain.	1. DLIS	Complete IS hit.	-	Intergenic/Pseudo/Repeaed Region	-	Intergenic/Pseudo/Repeaed Region	-	Intergenic/Pseudo/Repeaed Region	b1385	phenylacetaldehyde dehydrogenase	4763752.0
1	1					335	sim4	1667285	359	sim4	32	IS30_IS30	1667285	1668505.0	NC_000913.3_art_ISs	1666784.0	1667284.0		1668506.0	1669006.0	NC_000913.3	1625270.0				1626271.0	IS only present in query Strain.	1. DLIS	Complete IS hit.	b1537	conserved protein YdeJ	-	Intergenic/Pseudo/Repeaed Region	b1537	conserved protein YdeJ	b1538	peptidyl-dipeptidase Dcp	4763752.0
1	1					336	sim4	1669386	360	sim4	33	IS30_IS30	1669386	1670606.0	NC_000913.3_art_ISs	1668885.0	1669385.0		1670607.0	1671107.0	NC_000913.3	1626150.0				1627151.0	IS only present in query Strain.	1. DLIS	Complete IS hit.	-	Intergenic/Pseudo/Repeaed Region	-	Intergenic/Pseudo/Repeaed Region	b1538	peptidyl-dipeptidase Dcp	b1538	peptidyl-dipeptidase Dcp	4763752.0
1	1					337	sim4	1717319	361	sim4	34	IS30_IS30	1717319	1718539.0	NC_000913.3_art_ISs	1716818.0	1717318.0		1718540.0	1719040.0	NC_000913.3	1672862.0				1673863.0	IS only present in query Strain.	1. DLIS	Complete IS hit.	b1599	multidrug/spermidine efflux pump membrane subunit MdtI	-	Intergenic/Pseudo/Repeaed Region	b1599	multidrug/spermidine efflux pump membrane subunit MdtI	-	Intergenic/Pseudo/Repeaed Region	4763752.0
1	1					338	sim4	1746036	362	sim4	35	IS30_IS30	1746036	1747256.0	NC_000913.3_art_ISs	1745535.0	1746035.0		1747257.0	1747757.0	NC_000913.3	1700358.0				1701359.0	IS only present in query Strain.	1. DLIS	Complete IS hit.	-	Intergenic/Pseudo/Repeaed Region	b1622	negative regulator of MalT activity/cystathionine beta-lyase	b1621	PTS enzyme IIBC component MalX	b1622	negative regulator of MalT activity/cystathionine beta-lyase	4763752.0
1	1					339	sim4	1801578	363	sim4	36	IS30_IS30	1801578	1802798.0	NC_000913.3_art_ISs	1801077.0	1801577.0		1802799.0	1803299.0	NC_000913.3	1754679.0				1755680.0	IS only present in query Strain.	1. DLIS	Complete IS hit.	-	Intergenic/Pseudo/Repeaed Region	-	Intergenic/Pseudo/Repeaed Region	-	Intergenic/Pseudo/Repeaed Region	-	Intergenic/Pseudo/Repeaed Region	4763752.0
1	1					340	sim4	1874690	364	sim4	37	IS30_IS30	1874690	1875910.0	NC_000913.3_art_ISs	1874189.0	1874689.0		1875911.0	1876411.0	NC_000913.3	1826570.0				1827571.0	IS only present in query Strain.	1. DLIS	Complete IS hit.	b1744	succinylglutamate desuccinylase	-	Intergenic/Pseudo/Repeaed Region	b1744	succinylglutamate desuccinylase	b1745	N-succinylarginine dihydrolase	4763752.0
1	1					341	sim4	1957946	365	sim4	38	IS30_IS30	1957946	1959166.0	NC_000913.3_art_ISs	1957445.0	1957945.0		1959167.0	1959667.0	NC_000913.3	1908605.0				1909606.0	IS only present in query Strain.	1. DLIS	Complete IS hit.	-	Intergenic/Pseudo/Repeaed Region	b1827	DNA-binding transcriptional repressor KdgR	-	Intergenic/Pseudo/Repeaed Region	b1827	DNA-binding transcriptional repressor KdgR	4763752.0
1	1					342	sim4	2022861	366	sim4	39	IS30_IS30	2022861	2024081.0	NC_000913.3_art_ISs	2022360.0	2022860.0		2024082.0	2024582.0	NC_000913.3	1972299.0				1973300.0	IS only present in query Strain.	1. DLIS	Complete IS hit.	b1886	methyl-accepting chemotaxis protein Tar	b1887	chemotaxis protein CheW	b1886	methyl-accepting chemotaxis protein Tar	b1887	chemotaxis protein CheW	4763752.0
1	1					343	sim4	2053833	367	sim4	40	IS30_IS30	2053833	2055053.0	NC_000913.3_art_ISs	2053332.0	2053832.0		2055054.0	2055554.0	NC_000913.3	2002050.0				2003051.0	IS only present in query Strain.	1. DLIS	Complete IS hit.	-	Intergenic/Pseudo/Repeaed Region	-	Intergenic/Pseudo/Repeaed Region	-	Intergenic/Pseudo/Repeaed Region	b1923	flagellar filament structural protein	4763752.0
1	1					344	sim4	2088530	368	sim4	41	IS30_IS30	2088530	2089750.0	NC_000913.3_art_ISs	2088029.0	2088529.0		2089751.0	2090251.0	NC_000913.3	2035526.0				2036527.0	IS only present in query Strain.	1. DLIS	Complete IS hit.	-	Intergenic/Pseudo/Repeaed Region	-	Intergenic/Pseudo/Repeaed Region	-	Intergenic/Pseudo/Repeaed Region	b1967	protein/nucleic acid deglycase 1	4763752.0
1	1					345	sim4	2126922	369	sim4	42	IS30_IS30	2126922	2128142.0	NC_000913.3_art_ISs	2126421.0	2126921.0		2128143.0	2128643.0	NC_000913.3	2072697.0				2073698.0	IS only present in query Strain.	1. DLIS	Complete IS hit.	-	Intergenic/Pseudo/Repeaed Region	-	Intergenic/Pseudo/Repeaed Region	b2000	CP4-44 prophage; self recognizing antigen 43 (Ag43) autotransporter	b2000	CP4-44 prophage; self recognizing antigen 43 (Ag43) autotransporter	4763752.0
1	1					346	sim4	2131863	370	sim4	43	IS30_IS30	2131863	2133083.0	NC_000913.3_art_ISs	2131362.0	2131862.0		2133084.0	2133584.0	NC_000913.3	2076417.0				2077418.0	IS only present in query Strain.	1. DLIS	Complete IS hit.	b2002	CP4-44 prophage; RadC-like JAB domain-containing protein YeeS	b2004	CP4-44 prophage; cytoskeleton bundling-enhancing antitoxin CbeA	b2002	CP4-44 prophage; RadC-like JAB domain-containing protein YeeS	b2004	CP4-44 prophage; cytoskeleton bundling-enhancing antitoxin CbeA	4763752.0
1	1					347	sim4	2258971	371	sim4	44	IS30_IS30	2258971	2260191.0	NC_000913.3_art_ISs	2258470.0	2258970.0		2260192.0	2260692.0	NC_000913.3	2202304.0				2203305.0	IS only present in query Strain.	1. DLIS	Complete IS hit.	-	Intergenic/Pseudo/Repeaed Region	-	Intergenic/Pseudo/Repeaed Region	b2118	DUF4132 domain-containing protein YehI	b2118	DUF4132 domain-containing protein YehI	4763752.0
1	1					348	sim4	2268282	372	sim4	45	IS30_IS30	2268282	2269502.0	NC_000913.3_art_ISs	2267781.0	2268281.0		2269503.0	2270003.0	NC_000913.3	2210394.0				2211395.0	IS only present in query Strain.	1. DLIS	Complete IS hit.	-	Intergenic/Pseudo/Repeaed Region	b2123	DUF1307 domain-containing lipoprotein YehR	b2122	SWIM zinc finger domains-containing protein YehQ	b2123	DUF1307 domain-containing lipoprotein YehR	4763752.0
1	1					349	sim4	2281218	373	sim4	46	IS30_IS30	2281218	2282438.0	NC_000913.3_art_ISs	2280717.0	2281217.0		2282439.0	2282939.0	NC_000913.3	2222109.0				2223110.0	IS only present in query Strain.	1. DLIS	Complete IS hit.	-	Intergenic/Pseudo/Repeaed Region	-	Intergenic/Pseudo/Repeaed Region	-	Intergenic/Pseudo/Repeaed Region	b2133	D-lactate dehydrogenase	4763752.0
1	1					350	sim4	2415042	374	sim4	47	IS30_IS30	2415042	2416262.0	NC_000913.3_art_ISs	2414541.0	2415041.0		2416263.0	2416763.0	NC_000913.3	2354712.0				2355713.0	IS only present in query Strain.	1. DLIS	Complete IS hit.	-	Intergenic/Pseudo/Repeaed Region	b2243	anaerobic glycerol-3-phosphate dehydrogenase subunit C	b2242	anaerobic glycerol-3-phosphate dehydrogenase subunit B	b2243	anaerobic glycerol-3-phosphate dehydrogenase subunit C	4763752.0
1	1					351	sim4	2489942	375	sim4	48	IS30_IS30	2489942	2491162.0	NC_000913.3_art_ISs	2489441.0	2489941.0		2491163.0	2491663.0	NC_000913.3	2428391.0				2429392.0	IS only present in query Strain.	1. DLIS	Complete IS hit.	b2311	flavin prenyltransferase	-	Intergenic/Pseudo/Repeaed Region	b2311	flavin prenyltransferase	b2312	amidophosphoribosyltransferase	4763752.0
1	1					352	sim4	2515960	376	sim4	49	IS30_IS30	2515960	2517180.0	NC_000913.3_art_ISs	2515459.0	2515959.0		2517181.0	2517681.0	NC_000913.3	2453188.0				2454189.0	IS only present in query Strain.	1. DLIS	Complete IS hit.	-	Intergenic/Pseudo/Repeaed Region	-	Intergenic/Pseudo/Repeaed Region	b4661	putative outer membrane usher protein YfcU	b4661	putative outer membrane usher protein YfcU	4763752.0
1	1					353	sim4	2613563	377	sim4	50	IS30_IS30	2613563	2614783.0	NC_000913.3_art_ISs	2613062.0	2613562.0		2614784.0	2615284.0	NC_000913.3	2549570.0				2550571.0	IS only present in query Strain.	1. DLIS	Complete IS hit.	-	Intergenic/Pseudo/Repeaed Region	-	Intergenic/Pseudo/Repeaed Region	-	Intergenic/Pseudo/Repeaed Region	-	Intergenic/Pseudo/Repeaed Region	4763752.0
1	1					354	sim4	2638510	378	sim4	51	IS30_IS30	2638510	2639730.0	NC_000913.3_art_ISs	2638009.0	2638509.0		2639731.0	2640231.0	NC_000913.3	2573296.0				2574297.0	IS only present in query Strain.	1. DLIS	Complete IS hit.	b2458	phosphate acetyltransferase EutD	-	Intergenic/Pseudo/Repeaed Region	b2458	phosphate acetyltransferase EutD	b2459	putative ethanolamine utilization cobalamin adenosyltransferase	4763752.0
1	1					355	sim4	2670864	379	sim4	52	IS30_IS30	2670864	2672084.0	NC_000913.3_art_ISs	2670363.0	2670863.0		2672085.0	2672585.0	NC_000913.3	2604429.0				2605430.0	IS only present in query Strain.	1. DLIS	Complete IS hit.	b2483	hydrogenase 4 component C	-	Intergenic/Pseudo/Repeaed Region	b2483	hydrogenase 4 component C	b2484	hydrogenase 4 component D	4763752.0
1	1					356	sim4	2733401	380	sim4	53	IS30_IS30	2733401	2734621.0	NC_000913.3_art_ISs	2732900.0	2733400.0		2734622.0	2735122.0	NC_000913.3	2665745.0				2666746.0	IS only present in query Strain.	1. DLIS	Complete IS hit.	-	Intergenic/Pseudo/Repeaed Region	b2536	putative 3-phenylpropionate transporter	b2535	stationary phase inducible protein CsiE	b2536	putative 3-phenylpropionate transporter	4763752.0
1	1					357	sim4	2842950	381	sim4	54	IS30_IS30	2842950	2844170.0	NC_000913.3_art_ISs	2842449.0	2842949.0		2844171.0	2844671.0	NC_000913.3	2774073.0				2775074.0	IS only present in query Strain.	1. DLIS	Complete IS hit.	-	Intergenic/Pseudo/Repeaed Region	-	Intergenic/Pseudo/Repeaed Region	b2642	CP4-57 prophage; uncharacterized protein YfjW	-	Intergenic/Pseudo/Repeaed Region	4763752.0
1	1					358	sim4	2920213	382	sim4	55	IS30_IS30	2920213	2921433.0	NC_000913.3_art_ISs	2919712.0	2920212.0		2921434.0	2921934.0	NC_000913.3	2850115.0				2851116.0	IS only present in query Strain.	1. DLIS	Complete IS hit.	b2725	regulator of the transcriptional regulator FhlA	b2727	hydrogenase isoenzymes nickel incorporation protein HypB	b2725	regulator of the transcriptional regulator FhlA	b2727	hydrogenase isoenzymes nickel incorporation protein HypB	4763752.0
1	1					359	sim4	2931078	383	sim4	56	IS30_IS30	2931078	2932298.0	NC_000913.3_art_ISs	2930577.0	2931077.0		2932299.0	2932799.0	NC_000913.3	2859759.0				2860760.0	IS only present in query Strain.	1. DLIS	Complete IS hit.	-	Intergenic/Pseudo/Repeaed Region	b2735	putative DeoR-type DNA-binding transcriptional regulator YgbI	b2734	phosphoprotein phosphatase 2	b2735	putative DeoR-type DNA-binding transcriptional regulator YgbI	4763752.0
1	1					360	sim4	2941393	384	sim4	57	IS30_IS30	2941393	2942613.0	NC_000913.3_art_ISs	2940892.0	2941392.0		2942614.0	2943114.0	NC_000913.3	2868853.0				2869854.0	IS only present in query Strain.	1. DLIS	Complete IS hit.	-	Intergenic/Pseudo/Repeaed Region	b2744	broad specificity 5'(3')-nucleotidase and polyphosphatase	-	Intergenic/Pseudo/Repeaed Region	b2744	broad specificity 5'(3')-nucleotidase and polyphosphatase	4763752.0
1	1					361	sim4	2954862	385	sim4	58	IS30_IS30	2954862	2956082.0	NC_000913.3_art_ISs	2954361.0	2954861.0		2956083.0	2956583.0	NC_000913.3	2881101.0				2882102.0	IS only present in query Strain.	1. DLIS	Complete IS hit.	-	Intergenic/Pseudo/Repeaed Region	-	Intergenic/Pseudo/Repeaed Region	b2758	type I-E CRISPR system Cascade subunit CasC	b2758	type I-E CRISPR system Cascade subunit CasC	4763752.0
1	1					362	sim4	3019502	386	sim4	59	IS30_IS30	3019502	3020722.0	NC_000913.3_art_ISs	3019001.0	3019501.0		3020723.0	3021223.0	NC_000913.3	2944520.0				2945521.0	IS only present in query Strain.	1. DLIS	Complete IS hit.	b2810	cysteine sulfinate desulfinase	b2812	tRNA threonylcarbamoyladenosine dehydratase	b2810	cysteine sulfinate desulfinase	b2812	tRNA threonylcarbamoyladenosine dehydratase	4763752.0
1	1					363	sim4	3151596	387	sim4	60	IS30_IS30	3151596	3152816.0	NC_000913.3_art_ISs	3151095.0	3151595.0		3152817.0	3153317.0	NC_000913.3	3075393.0				3076394.0	IS only present in query Strain.	1. DLIS	Complete IS hit.	-	Intergenic/Pseudo/Repeaed Region	b4465	putative zinc-binding dehydrogenase YggP	b2930	fructose 1;6-bisphosphatase YggF	b4465	putative zinc-binding dehydrogenase YggP	4763752.0
1	1					364	sim4	3156765	388	sim4	61	IS30_IS30	3156765	3157985.0	NC_000913.3_art_ISs	3156264.0	3156764.0		3157986.0	3158486.0	NC_000913.3	3079341.0				3080342.0	IS only present in query Strain.	1. DLIS	Complete IS hit.	-	Intergenic/Pseudo/Repeaed Region	-	Intergenic/Pseudo/Repeaed Region	-	Intergenic/Pseudo/Repeaed Region	b2935	transketolase 1	4763752.0
1	1					365	sim4	3180456	389	sim4	62	IS30_IS30	3180456	3181676.0	NC_000913.3_art_ISs	3179955.0	3180455.0		3181677.0	3182177.0	NC_000913.3	3101811.0				3102812.0	IS only present in query Strain.	1. DLIS	Complete IS hit.	b2959	protein YggL	-	Intergenic/Pseudo/Repeaed Region	b2959	protein YggL	b2960	tRNA m(7)G46 methyltransferase	4763752.0
1	1					366	sim4	3205407	390	sim4	63	IS30_IS30	3205407	3206627.0	NC_000913.3_art_ISs	3204906.0	3205406.0		3206628.0	3207128.0	NC_000913.3	3125541.0				3126542.0	IS only present in query Strain.	1. DLIS	Complete IS hit.	-	Intergenic/Pseudo/Repeaed Region	b2979	glycolate dehydrogenase; putative FAD-linked subunit	b4468	glycolate dehydrogenase; putative FAD-binding subunit	b2979	glycolate dehydrogenase; putative FAD-linked subunit	4763752.0
1	1					367	sim4	3294867	391	sim4	64	IS30_IS30	3294867	3296087.0	NC_000913.3_art_ISs	3294366.0	3294866.0		3296088.0	3296588.0	NC_000913.3	3213780.0				3214781.0	IS only present in query Strain.	1. DLIS	Complete IS hit.	-	Intergenic/Pseudo/Repeaed Region	-	Intergenic/Pseudo/Repeaed Region	b3067	RNA polymerase; sigma 70 (sigma D) factor	b3067	RNA polymerase; sigma 70 (sigma D) factor	4763752.0
1	1					368	sim4	3309394	392	sim4	65	IS30_IS30	3309394	3310614.0	NC_000913.3_art_ISs	3308893.0	3309393.0		3310615.0	3311115.0	NC_000913.3	3227086.0				3228087.0	IS only present in query Strain.	1. DLIS	Complete IS hit.	-	Intergenic/Pseudo/Repeaed Region	b3079	protein YgjJ	b3078	putative transporter YgjI	b3079	protein YgjJ	4763752.0
1	1					369	sim4	3351736	393	sim4	66	IS30_IS30	3351736	3352956.0	NC_000913.3_art_ISs	3351235.0	3351735.0		3352957.0	3353457.0	NC_000913.3	3268207.0				3269208.0	IS only present in query Strain.	1. DLIS	Complete IS hit.	b3120	protein YhaB	-	Intergenic/Pseudo/Repeaed Region	b3120	protein YhaB	b3121	uncharacterized protein YhaC	4763752.0
1	1					370	sim4	3366877	394	sim4	67	IS30_IS30	3366877	3368097.0	NC_000913.3_art_ISs	3366376.0	3366876.0		3368098.0	3368598.0	NC_000913.3	3282127.0				3283128.0	IS only present in query Strain.	1. DLIS	Complete IS hit.	-	Intergenic/Pseudo/Repeaed Region	-	Intergenic/Pseudo/Repeaed Region	b3136	putative galactosamine-6-phosphate deaminase/isomerase	b3136	putative galactosamine-6-phosphate deaminase/isomerase	4763752.0
1	1					371	sim4	3392118	395	sim4	68	IS30_IS30	3392118	3393338.0	NC_000913.3_art_ISs	3391617.0	3392117.0		3393339.0	3393839.0	NC_000913.3	3306147.0				3307148.0	IS only present in query Strain.	1. DLIS	Complete IS hit.	-	Intergenic/Pseudo/Repeaed Region	-	Intergenic/Pseudo/Repeaed Region	b3162	ATP-dependent RNA helicase DeaD	b3162	ATP-dependent RNA helicase DeaD	4763752.0
1	1					372	sim4	3440295	396	sim4	69	IS30_IS30	3440295	3441515.0	NC_000913.3_art_ISs	3439794.0	3440294.0		3441516.0	3442016.0	NC_000913.3	3353103.0				3354104.0	IS only present in query Strain.	1. DLIS	Complete IS hit.	-	Intergenic/Pseudo/Repeaed Region	-	Intergenic/Pseudo/Repeaed Region	-	Intergenic/Pseudo/Repeaed Region	-	Intergenic/Pseudo/Repeaed Region	4763752.0
1	1					373	sim4	3537081	397	sim4	70	IS30_IS30	3537081	3538301.0	NC_000913.3_art_ISs	3536580.0	3537080.0		3538302.0	3538802.0	NC_000913.3	3448668.0				3449669.0	IS only present in query Strain.	1. DLIS	Complete IS hit.	b3312	50S ribosomal subunit protein L29	b3314	30S ribosomal subunit protein S3	b3312	50S ribosomal subunit protein L29	b3314	30S ribosomal subunit protein S3	4763752.0
1	1					374	sim4	3634993	398	sim4	71	IS30_IS30	3634993	3636213.0	NC_000913.3_art_ISs	3634492.0	3634992.0		3636214.0	3636714.0	NC_000913.3	3545359.0				3546360.0	IS only present in query Strain.	1. DLIS	Complete IS hit.	b3413	DNA utilization protein YhgH	-	Intergenic/Pseudo/Repeaed Region	b3413	DNA utilization protein YhgH	-	Intergenic/Pseudo/Repeaed Region	4763752.0
1	1					375	sim4	3648419	399	sim4	72	IS30_IS30	3648419	3649639.0	NC_000913.3_art_ISs	3647918.0	3648418.0		3649640.0	3650140.0	NC_000913.3	3557564.0				3558565.0	IS only present in query Strain.	1. DLIS	Complete IS hit.	-	Intergenic/Pseudo/Repeaed Region	b3422	DNA-binding transcriptional activator RtcR	b3421	RNA-splicing ligase	b3422	DNA-binding transcriptional activator RtcR	4763752.0
1	1					376	sim4	3660215	400	sim4	73	IS30_IS30	3660215	3661435.0	NC_000913.3_art_ISs	3659714.0	3660214.0		3661436.0	3661936.0	NC_000913.3	3568139.0				3569140.0	IS only present in query Strain.	1. DLIS	Complete IS hit.	-	Intergenic/Pseudo/Repeaed Region	-	Intergenic/Pseudo/Repeaed Region	b3430	glucose-1-phosphate adenylyltransferase	b3430	glucose-1-phosphate adenylyltransferase	4763752.0
1	1					377	sim4	3700344	401	sim4	74	IS30_IS30	3700344	3701564.0	NC_000913.3_art_ISs	3699843.0	3700343.0		3701565.0	3702065.0	NC_000913.3	3607047.0				3608048.0	IS only present in query Strain.	1. DLIS	Complete IS hit.	-	Intergenic/Pseudo/Repeaed Region	-	Intergenic/Pseudo/Repeaed Region	b3469	Zn(2(+))/Cd(2(+))/Pb(2(+)) exporting P-type ATPase	b3469	Zn(2(+))/Cd(2(+))/Pb(2(+)) exporting P-type ATPase	4763752.0
1	1					378	sim4	3765578	402	sim4	75	IS30_IS30	3765578	3766798.0	NC_000913.3_art_ISs	3765077.0	3765577.0		3766799.0	3767299.0	NC_000913.3	3671060.0				3672061.0	IS only present in query Strain.	1. DLIS	Complete IS hit.	b3519	cytoplasmic trehalase	-	Intergenic/Pseudo/Repeaed Region	b3519	cytoplasmic trehalase	-	Intergenic/Pseudo/Repeaed Region	4763752.0
1	1					379	sim4	3771325	403	sim4	76	IS30_IS30	3771325	3772545.0	NC_000913.3_art_ISs	3770824.0	3771324.0		3772546.0	3773046.0	NC_000913.3	3675586.0				3676587.0	IS only present in query Strain.	1. DLIS	Complete IS hit.	-	Intergenic/Pseudo/Repeaed Region	b3524	AsmA family protein YhjG	b3523	putative transporter YhjE	b3524	AsmA family protein YhjG	4763752.0
1	1					380	sim4	3825158	404	sim4	77	IS30_IS30	3825158	3826378.0	NC_000913.3_art_ISs	3824657.0	3825157.0		3826379.0	3826879.0	NC_000913.3	3728198.0				3729199.0	IS only present in query Strain.	1. DLIS	Complete IS hit.	-	Intergenic/Pseudo/Repeaed Region	-	Intergenic/Pseudo/Repeaed Region	b3564	xylulokinase	b3564	xylulokinase	4763752.0
1	1					381	sim4	3899874	405	sim4	78	IS30_IS30	3899874	3901094.0	NC_000913.3_art_ISs	3899373.0	3899873.0		3901095.0	3901595.0	NC_000913.3	3801693.0				3802694.0	IS only present in query Strain.	1. DLIS	Complete IS hit.	b3626	UDP-glucose:(glucosyl)LPS alpha-1;2-glucosyltransferase	-	Intergenic/Pseudo/Repeaed Region	b3626	UDP-glucose:(glucosyl)LPS alpha-1;2-glucosyltransferase	b3627	UDP-D-glucose:(glucosyl)LPS alpha-1;3-glucosyltransferase	4763752.0
1	1					382	sim4	3946541	406	sim4	79	IS30_IS30	3946541	3947761.0	NC_000913.3_art_ISs	3946040.0	3946540.0		3947762.0	3948262.0	NC_000913.3	3847139.0				3848140.0	IS only present in query Strain.	1. DLIS	Complete IS hit.	b3666	hexose-6-phosphate:phosphate antiporter	-	Intergenic/Pseudo/Repeaed Region	b3666	hexose-6-phosphate:phosphate antiporter	b3667	inner membrane protein sensing glucose-6-phosphate	4763752.0
1	1					383	sim4	3974322	407	sim4	80	IS30_IS30	3974322	3975542.0	NC_000913.3_art_ISs	3973821.0	3974321.0		3975543.0	3976043.0	NC_000913.3	3873699.0				3874700.0	IS only present in query Strain.	1. DLIS	Complete IS hit.	-	Intergenic/Pseudo/Repeaed Region	b4479	putative DNA-binding transcriptional regulator DgoR	b3693	2-dehydro-3-deoxygalactonokinase	b4479	putative DNA-binding transcriptional regulator DgoR	4763752.0
1	1					386	sim4	3990901	408	sim4	81	IS30_IS30	3990901	3992121.0	NC_000913.3_art_ISs	3990400.0	3990900.0		3992122.0	3992622.0	NC_000913.3	3886615.0				3887616.0	IS only present in query Strain.	1. DLIS	Complete IS hit.	-	Intergenic/Pseudo/Repeaed Region	-	Intergenic/Pseudo/Repeaed Region	b3705	membrane protein insertase YidC	b3706	5-carboxymethylaminomethyluridine-tRNA synthase GTPase subunit	4763752.0
1	1					387	sim4	4140838	409	sim4	82	IS30_IS30	4140838	4142058.0	NC_000913.3_art_ISs	4140337.0	4140837.0		4142059.0	4142559.0	NC_000913.3	2730356.0				2731357.0	IS only present in query Strain.	1. DLIS	Complete IS hit.	-	Intergenic/Pseudo/Repeaed Region	-	Intergenic/Pseudo/Repeaed Region	-	Intergenic/Pseudo/Repeaed Region	-	Intergenic/Pseudo/Repeaed Region	4763752.0
1	1					388	sim4	4188116	410	sim4	83	IS30_IS30	4188116	4189336.0	NC_000913.3_art_ISs	4187615.0	4188115.0		4189337.0	4189837.0	NC_000913.3	4081388.0				4082308.0	IS only present in query Strain.	1. DLIS	Complete IS hit.	b3892	formate dehydrogenase O subunit gamma	-	Intergenic/Pseudo/Repeaed Region	b3892	formate dehydrogenase O subunit gamma	b3893	formate dehydrogenase O subunit beta	4763752.0
1	1					389	sim4	4189756	411	sim4	84	IS30_IS30	4189756	4190976.0	NC_000913.3_art_ISs	4189255.0	4189755.0		4190977.0	4191477.0	NC_000913.3	4081887.0				4082808.0	IS only present in query Strain.	1. DLIS	Complete IS hit.	-	Intergenic/Pseudo/Repeaed Region	b3894	formate dehydrogenase O subunit alpha	b3893	formate dehydrogenase O subunit beta	b3894	formate dehydrogenase O subunit alpha	4763752.0
1	1					390	sim4	4209246	412	sim4	85	IS30_IS30	4209246	4210466.0	NC_000913.3_art_ISs	4208745.0	4209245.0		4210467.0	4210967.0	NC_000913.3	4100076.0				4101077.0	IS only present in query Strain.	1. DLIS	Complete IS hit.	b3907	rhamnose/lyxose:H(+) symporter	b3908	superoxide dismutase (Mn)	b3907	rhamnose/lyxose:H(+) symporter	b3908	superoxide dismutase (Mn)	4763752.0
1	1					391	sim4	4297329	413	sim4	86	IS30_IS30	4297329	4298549.0	NC_000913.3_art_ISs	4296828.0	4297328.0		4298550.0	4299050.0	NC_000913.3	4186938.0				4187939.0	IS only present in query Strain.	1. DLIS	Complete IS hit.	-	Intergenic/Pseudo/Repeaed Region	-	Intergenic/Pseudo/Repeaed Region	b3988	RNA polymerase subunit beta'	b3988	RNA polymerase subunit beta'	4763752.0
1	1					394	sim4	4378103	414	sim4	87	IS30_IS30	4378103	4379323.0	NC_000913.3_art_ISs	4377602.0	4378102.0		4379324.0	4379824.0	NC_000913.3	4264049.0				4265050.0	IS only present in query Strain.	1. DLIS	Complete IS hit.	b4051	putative quinone oxidoreductase 1	-	Intergenic/Pseudo/Repeaed Region	b4051	putative quinone oxidoreductase 1	b4052	replicative DNA helicase	4763752.0
1	1					395	sim4	4412796	415	sim4	88	IS30_IS30	4412796	4414016.0	NC_000913.3_art_ISs	4412295.0	4412795.0		4414017.0	4414517.0	NC_000913.3	4297521.0				4298522.0	IS only present in query Strain.	1. DLIS	Complete IS hit.	-	Intergenic/Pseudo/Repeaed Region	-	Intergenic/Pseudo/Repeaed Region	b4079	formate dehydrogenase H	b4079	formate dehydrogenase H	4763752.0
1	1					396	sim4	4490609	416	sim4	89	IS30_IS30	4490609	4491829.0	NC_000913.3_art_ISs	4490108.0	4490608.0		4491830.0	4492330.0	NC_000913.3	4374113.0				4375114.0	IS only present in query Strain.	1. DLIS	Complete IS hit.	b4145	protein YjeJ	b4146	lysine 2;3-aminomutase	b4145	protein YjeJ	b4146	lysine 2;3-aminomutase	4763752.0
1	1					397	sim4	4541289	417	sim4	90	IS30_IS30	4541289	4542509.0	NC_000913.3_art_ISs	4540788.0	4541288.0		4542510.0	4543010.0	NC_000913.3	4423572.0				4424573.0	IS only present in query Strain.	1. DLIS	Complete IS hit.	b4197	L-ribulose-5-phosphate 3-epimerase UlaE	b4199	DUF1471 domain-containing protein YjfY	b4197	L-ribulose-5-phosphate 3-epimerase UlaE	b4199	DUF1471 domain-containing protein YjfY	4763752.0
1	1					398	sim4	4547589	418	sim4	91	IS30_IS30	4547589	4548809.0	NC_000913.3_art_ISs	4547088.0	4547588.0		4548810.0	4549310.0	NC_000913.3	4428651.0				4429652.0	IS only present in query Strain.	1. DLIS	Complete IS hit.	b4206	cell division protein YtfB	-	Intergenic/Pseudo/Repeaed Region	b4206	cell division protein YtfB	-	Intergenic/Pseudo/Repeaed Region	4763752.0
1	1					399	sim4	4568814	419	sim4	92	IS30_IS30	4568814	4570034.0	NC_000913.3_art_ISs	4568313.0	4568813.0		4570035.0	4570535.0	NC_000913.3	4448655.0				4449656.0	IS only present in query Strain.	1. DLIS	Complete IS hit.	b4224	ChpS antitoxin of the ChpB-ChpS toxin-antitoxin system	-	Intergenic/Pseudo/Repeaed Region	b4224	ChpS antitoxin of the ChpB-ChpS toxin-antitoxin system	-	Intergenic/Pseudo/Repeaed Region	4763752.0
1	1					400	sim4	4600742	420	sim4	93	IS30_IS30	4600742	4601962.0	NC_000913.3_art_ISs	4600241.0	4600741.0		4601963.0	4602463.0	NC_000913.3	4479362.0				4480363.0	IS only present in query Strain.	1. DLIS	Complete IS hit.	b4256	putative acetyltransferase YjgM	-	Intergenic/Pseudo/Repeaed Region	b4256	putative acetyltransferase YjgM	b4257	conserved inner membrane protein YjgN	4763752.0
1	1					401	sim5	92434	431	sim5	0	IS30_IS30	92434	93654.0	NC_000913.3_art_ISs	91933.0	92433.0		93655.0	94155.0	NC_000913.3	91933.0				92934.0	IS only present in query Strain.	1. DLIS	Complete IS hit.	-	Intergenic/Pseudo/Repeaed Region	-	Intergenic/Pseudo/Repeaed Region	b0084	peptidoglycan DD-transpeptidase FtsI	b0084	peptidoglycan DD-transpeptidase FtsI	4763752.0
1	1					402	sim5	211707	432	sim5	1	IS30_IS30	211707	212927.0	NC_000913.3_art_ISs	211206.0	211706.0		212928.0	213428.0	NC_000913.3	209985.0				210986.0	IS only present in query Strain.	1. DLIS	Complete IS hit.	-	Intergenic/Pseudo/Repeaed Region	-	Intergenic/Pseudo/Repeaed Region	b0186	lysine decarboxylase 2	b0186	lysine decarboxylase 2	4763752.0
1	1					403	sim5	275753	433	sim5	2	IS30_IS30	275753	276973.0	NC_000913.3_art_ISs	275252.0	275752.0		276974.0	277474.0	NC_000913.3	272810.0				273811.0	IS only present in query Strain.	1. DLIS	Complete IS hit.	-	Intergenic/Pseudo/Repeaed Region	-	Intergenic/Pseudo/Repeaed Region	-	Intergenic/Pseudo/Repeaed Region	b0258	CP4-6 prophage; PF00078 domain-containing protein YkfC	4763752.0
1	1					404	sim5	285088	434	sim5	3	IS30_IS30	285088	286308.0	NC_000913.3_art_ISs	284587.0	285087.0		286309.0	286809.0	NC_000913.3	280924.0				281925.0	IS only present in query Strain.	1. DLIS	Complete IS hit.	-	Intergenic/Pseudo/Repeaed Region	-	Intergenic/Pseudo/Repeaed Region	b0267	CP4-6 prophage; integrase core domain-containing protein YagA	b0267	CP4-6 prophage; integrase core domain-containing protein YagA	4763752.0
1	1					405	sim5	340169	435	sim5	4	IS30_IS30	340169	341389.0	NC_000913.3_art_ISs	339668.0	340168.0		341390.0	341890.0	NC_000913.3	334784.0				335785.0	IS only present in query Strain.	1. DLIS	Complete IS hit.	b0317	uncharacterized protein YahC	-	Intergenic/Pseudo/Repeaed Region	b0317	uncharacterized protein YahC	b0318	ankyrin repeat-containing protein YahD	4763752.0
1	1					406	sim5	473511	436	sim5	5	IS30_IS30	473511	474731.0	NC_000913.3_art_ISs	473010.0	473510.0		474732.0	475232.0	NC_000913.3	466905.0				467906.0	IS only present in query Strain.	1. DLIS	Complete IS hit.	b0445	putative protein YbaE	b0446	HMP-PP phosphatase	b0445	putative protein YbaE	b0446	HMP-PP phosphatase	4763752.0
1	1					407	sim5	484993	437	sim5	6	IS30_IS30	484993	486213.0	NC_000913.3_art_ISs	484492.0	484992.0		486214.0	486714.0	NC_000913.3	477166.0				478167.0	IS only present in query Strain.	1. DLIS	Complete IS hit.	-	Intergenic/Pseudo/Repeaed Region	-	Intergenic/Pseudo/Repeaed Region	b0457	c-di-GMP phosphodiesterase PdeB	b0457	c-di-GMP phosphodiesterase PdeB	4763752.0
1	1					408	sim5	513478	438	sim5	7	IS30_IS30	513478	514698.0	NC_000913.3_art_ISs	512977.0	513477.0		514699.0	515199.0	NC_000913.3	504430.0				505431.0	IS only present in query Strain.	1. DLIS	Complete IS hit.	b0479	fosmidomycin efflux pump	-	Intergenic/Pseudo/Repeaed Region	b0479	fosmidomycin efflux pump	b0480	5'-nucleotidase/UDP-sugar hydrolase	4763752.0
1	1					409	sim5	582398	439	sim5	8	IS30_IS30	582398	583618.0	NC_000913.3_art_ISs	581897.0	582397.0		583619.0	584119.0	NC_000913.3	572129.0				573130.0	IS only present in query Strain.	1. DLIS	Complete IS hit.	b0546	DLP12 prophage; putative DNA-binding transcriptional regulator	b0549	DLP12 prophage; putative nuclease YbcO	b0546	DLP12 prophage; putative DNA-binding transcriptional regulator	b0549	DLP12 prophage; putative nuclease YbcO	4763752.0
1	1					410	sim5	624685	440	sim5	9	IS30_IS30	624685	625905.0	NC_000913.3_art_ISs	624184.0	624684.0		625906.0	626406.0	NC_000913.3	613195.0				614196.0	IS only present in query Strain.	1. DLIS	Complete IS hit.	-	Intergenic/Pseudo/Repeaed Region	b0586	apo-serine activating enzyme	b0585	enterochelin esterase	b0586	apo-serine activating enzyme	4763752.0
1	1					411	sim5	668439	441	sim5	10	IS30_IS30	668439	669659.0	NC_000913.3_art_ISs	667938.0	668438.0		669660.0	670160.0	NC_000913.3	655728.0				656729.0	IS only present in query Strain.	1. DLIS	Complete IS hit.	b0621	anaerobic C4-dicarboxylate transporter DcuC	b0622	Lipid IVA palmitoyltransferase	b0621	anaerobic C4-dicarboxylate transporter DcuC	b0622	Lipid IVA palmitoyltransferase	4763752.0
1	1					412	sim5	708711	442	sim5	11	IS30_IS30	708711	709931.0	NC_000913.3_art_ISs	708210.0	708710.0		709932.0	710432.0	NC_000913.3	694779.0				695780.0	IS only present in query Strain.	1. DLIS	Complete IS hit.	b0661	isopentenyl-adenosine A37 tRNA methylthiolase	-	Intergenic/Pseudo/Repeaed Region	b0661	isopentenyl-adenosine A37 tRNA methylthiolase	b0662	2-octaprenyl-3-methyl-6-methoxy-1;4-benzoquinol hydroxylase	4763752.0
1	1					413	sim5	722380	443	sim5	12	IS30_IS30	722380	723600.0	NC_000913.3_art_ISs	721879.0	722379.0		723601.0	724101.0	NC_000913.3	707227.0				708228.0	IS only present in query Strain.	1. DLIS	Complete IS hit.	-	Intergenic/Pseudo/Repeaed Region	-	Intergenic/Pseudo/Repeaed Region	b0680	glutamine--tRNA ligase	-	Intergenic/Pseudo/Repeaed Region	4763752.0
1	1					414	sim5	770307	444	sim5	13	IS30_IS30	770307	771527.0	NC_000913.3_art_ISs	769806.0	770306.0		771528.0	772028.0	NC_000913.3	753933.0				754934.0	IS only present in query Strain.	1. DLIS	Complete IS hit.	-	Intergenic/Pseudo/Repeaed Region	-	Intergenic/Pseudo/Repeaed Region	b0720	citrate synthase	-	Intergenic/Pseudo/Repeaed Region	4763752.0
1	1					415	sim5	772624	445	sim5	14	IS30_IS30	772624	773844.0	NC_000913.3_art_ISs	772123.0	772623.0		773845.0	774345.0	NC_000913.3	755029.0				756030.0	IS only present in query Strain.	1. DLIS	Complete IS hit.	-	Intergenic/Pseudo/Repeaed Region	b0723	succinate:quinone oxidoreductase; FAD binding protein	-	Intergenic/Pseudo/Repeaed Region	b0723	succinate:quinone oxidoreductase; FAD binding protein	4763752.0
1	1					416	sim5	802280	446	sim5	15	IS30_IS30	802280	803500.0	NC_000913.3_art_ISs	801779.0	802279.0		803501.0	804001.0	NC_000913.3	783464.0				784465.0	IS only present in query Strain.	1. DLIS	Complete IS hit.	b0751	nicotinamide riboside transporter	-	Intergenic/Pseudo/Repeaed Region	b0751	nicotinamide riboside transporter	b0752	Zn(2(+))/Cd(2(+))/Ni(2(+))/Cu(2(+)) exporter	4763752.0
1	1					417	sim5	838921	447	sim5	16	IS30_IS30	838921	840141.0	NC_000913.3_art_ISs	838420.0	838920.0		840142.0	840642.0	NC_000913.3	818884.0				819885.0	IS only present in query Strain.	1. DLIS	Complete IS hit.	b0783	cyclic pyranopterin monophosphate synthase	b0786	Bax1-I family protein YbhL	b0783	cyclic pyranopterin monophosphate synthase	b0786	Bax1-I family protein YbhL	4763752.0
1	1					418	sim5	849743	448	sim5	17	IS30_IS30	849743	850963.0	NC_000913.3_art_ISs	849242.0	849742.0		850964.0	851464.0	NC_000913.3	828485.0				829486.0	IS only present in query Strain.	1. DLIS	Complete IS hit.	b0794	putative ABC exporter ATP binding subunit	-	Intergenic/Pseudo/Repeaed Region	b0794	putative ABC exporter ATP binding subunit	b0795	HlyD_D23 family protein YbhG	4763752.0
1	1					419	sim5	927273	449	sim5	18	IS30_IS30	927273	928493.0	NC_000913.3_art_ISs	926772.0	927272.0		928494.0	928994.0	NC_000913.3	904794.0				905795.0	IS only present in query Strain.	1. DLIS	Complete IS hit.	b0866	putative heavy metal binding protein YbjQ	b0868	putative NAD(P)H-binding oxidoreductase with NAD(P)-binding Rossmann-fold domain	b0866	putative heavy metal binding protein YbjQ	b0868	putative NAD(P)H-binding oxidoreductase with NAD(P)-binding Rossmann-fold domain	4763752.0
1	1					420	sim5	1005790	450	sim5	19	IS30_IS30	1005790	1007010.0	NC_000913.3_art_ISs	1005289.0	1005789.0		1007011.0	1007511.0	NC_000913.3	982090.0				983091.0	IS only present in query Strain.	1. DLIS	Complete IS hit.	-	Intergenic/Pseudo/Repeaed Region	b0926	DUF882 domain-containing protein YcbK	b0925	L;D-transpeptidase LdtD	b0926	DUF882 domain-containing protein YcbK	4763752.0
1	1					421	sim5	1032995	451	sim5	20	IS30_IS30	1032995	1034215.0	NC_000913.3_art_ISs	1032494.0	1032994.0		1034216.0	1034716.0	NC_000913.3	1008074.0				1009075.0	IS only present in query Strain.	1. DLIS	Complete IS hit.	-	Intergenic/Pseudo/Repeaed Region	-	Intergenic/Pseudo/Repeaed Region	b0948	fused 23S rRNA m(2)G2445 methyltransferase and 23S rRNA m(7)G2069 methyltransferase	b0948	fused 23S rRNA m(2)G2445 methyltransferase and 23S rRNA m(7)G2069 methyltransferase	4763752.0
1	1					422	sim5	1046617	452	sim5	21	IS30_IS30	1046617	1047837.0	NC_000913.3_art_ISs	1046116.0	1046616.0		1047838.0	1048338.0	NC_000913.3	1020475.0				1021476.0	IS only present in query Strain.	1. DLIS	Complete IS hit.	b0958	cell division inhibitor SulA	b0959	transcriptional coactivator for CRP	b0958	cell division inhibitor SulA	b0959	transcriptional coactivator for CRP	4763752.0
1	1					423	sim5	1136708	453	sim5	22	IS30_IS30	1136708	1137928.0	NC_000913.3_art_ISs	1136207.0	1136707.0		1137929.0	1138429.0	NC_000913.3	1109345.0				1110346.0	IS only present in query Strain.	1. DLIS	Complete IS hit.	-	Intergenic/Pseudo/Repeaed Region	-	Intergenic/Pseudo/Repeaed Region	b1048	osmoregulated periplasmic glucans (OPGs) biosynthesis protein G	b1048	osmoregulated periplasmic glucans (OPGs) biosynthesis protein G	4763752.0
1	1					424	sim5	1216795	454	sim5	23	IS30_IS30	1216795	1218015.0	NC_000913.3_art_ISs	1216294.0	1216794.0		1218016.0	1218516.0	NC_000913.3	1188211.0				1189212.0	IS only present in query Strain.	1. DLIS	Complete IS hit.	b1128	ribosomal protein-arginine oxygenase	-	Intergenic/Pseudo/Repeaed Region	b1128	ribosomal protein-arginine oxygenase	b1129	sensory histidine kinase PhoQ	4763752.0
1	1					425	sim5	1280454	455	sim5	24	IS30_IS30	1280454	1281674.0	NC_000913.3_art_ISs	1279953.0	1280453.0		1281675.0	1282175.0	NC_000913.3	1250649.0				1251650.0	IS only present in query Strain.	1. DLIS	Complete IS hit.	b1200	dihydroxyacetone kinase subunit K	-	Intergenic/Pseudo/Repeaed Region	b1200	dihydroxyacetone kinase subunit K	b1201	DNA-binding transcriptional dual regulator DhaR	4763752.0
1	1					428	sim5	1340239	456	sim5	25	IS30_IS30	1340239	1341459.0	NC_000913.3_art_ISs	1339738.0	1340238.0		1341460.0	1341960.0	NC_000913.3	1306771.0				1307772.0	IS only present in query Strain.	1. DLIS	Complete IS hit.	-	Intergenic/Pseudo/Repeaed Region	-	Intergenic/Pseudo/Repeaed Region	-	Intergenic/Pseudo/Repeaed Region	b1249	cardiolipin synthase A	4763752.0
1	1					429	sim5	1347554	457	sim5	26	IS30_IS30	1347554	1348774.0	NC_000913.3_art_ISs	1347053.0	1347553.0		1348775.0	1349275.0	NC_000913.3	1312865.0				1313866.0	IS only present in query Strain.	1. DLIS	Complete IS hit.	b1254	inner membrane protein	-	Intergenic/Pseudo/Repeaed Region	b1254	inner membrane protein	-	Intergenic/Pseudo/Repeaed Region	4763752.0
1	1					430	sim5	1351065	458	sim5	27	IS30_IS30	1351065	1352285.0	NC_000913.3_art_ISs	1350564.0	1351064.0		1352286.0	1352786.0	NC_000913.3	1315155.0				1316156.0	IS only present in query Strain.	1. DLIS	Complete IS hit.	b1257	DUF892 domain-containing protein YciE	-	Intergenic/Pseudo/Repeaed Region	b1257	DUF892 domain-containing protein YciE	-	Intergenic/Pseudo/Repeaed Region	4763752.0
1	1					431	sim5	1395060	459	sim5	28	IS30_IS30	1395060	1396280.0	NC_000913.3_art_ISs	1394559.0	1395059.0		1396281.0	1396781.0	NC_000913.3	1357929.0				1358930.0	IS only present in query Strain.	1. DLIS	Complete IS hit.	-	Intergenic/Pseudo/Repeaed Region	-	Intergenic/Pseudo/Repeaed Region	b1296	putrescine:H(+) symporter PuuP	b1296	putrescine:H(+) symporter PuuP	4763752.0
1	1					432	sim5	1421962	460	sim5	29	IS30_IS30	1421962	1423182.0	NC_000913.3_art_ISs	1421461.0	1421961.0		1423183.0	1423683.0	NC_000913.3	1383610.0				1384611.0	IS only present in query Strain.	1. DLIS	Complete IS hit.	b1320	putative LacI-type DNA-binding transcriptional regulator YcjW	b1321	DUF463 domain-containing protein YcjX	b1320	putative LacI-type DNA-binding transcriptional regulator YcjW	b1321	DUF463 domain-containing protein YcjX	4763752.0
1	1					433	sim5	1454343	461	sim5	30	IS30_IS30	1454343	1455563.0	NC_000913.3_art_ISs	1453842.0	1454342.0		1455564.0	1456064.0	NC_000913.3	1414770.0				1415771.0	IS only present in query Strain.	1. DLIS	Complete IS hit.	b1349	Rac prophage; recombinase; DNA renaturation	-	Intergenic/Pseudo/Repeaed Region	b1349	Rac prophage; recombinase; DNA renaturation	b1350	Rac prophage; exonuclease VIII; ds DNA exonuclease; 5' --> 3' specific	4763752.0
1	1					434	sim5	1463036	462	sim5	31	IS30_IS30	1463036	1464256.0	NC_000913.3_art_ISs	1462535.0	1463035.0		1464257.0	1464757.0	NC_000913.3	1422242.0				1423243.0	IS only present in query Strain.	1. DLIS	Complete IS hit.	b1360	Rac prophage; putative ATP-binding protein YdaV	b1361	Rac prophage; putative uncharacterized protein YdaW	b1360	Rac prophage; putative ATP-binding protein YdaV	b1361	Rac prophage; putative uncharacterized protein YdaW	4763752.0
1	1					435	sim5	1626400	463	sim5	32	IS30_IS30	1626400	1627620.0	NC_000913.3_art_ISs	1625899.0	1626399.0		1627621.0	1628121.0	NC_000913.3	1584385.0				1585386.0	IS only present in query Strain.	1. DLIS	Complete IS hit.	-	Intergenic/Pseudo/Repeaed Region	-	Intergenic/Pseudo/Repeaed Region	b1501	putative oxidoreductase YdeP	b1501	putative oxidoreductase YdeP	4763752.0
1	1					436	sim5	1672307	464	sim5	33	IS30_IS30	1672307	1673527.0	NC_000913.3_art_ISs	1671806.0	1672306.0		1673528.0	1674028.0	NC_000913.3	1629071.0				1630072.0	IS only present in query Strain.	1. DLIS	Complete IS hit.	-	Intergenic/Pseudo/Repeaed Region	-	Intergenic/Pseudo/Repeaed Region	-	Intergenic/Pseudo/Repeaed Region	b1542	putative oxidoreductase YdfI	4763752.0
1	1					437	sim5	1685413	465	sim5	34	IS30_IS30	1685413	1686633.0	NC_000913.3_art_ISs	1684912.0	1685412.0		1686634.0	1687134.0	NC_000913.3	1640956.0				1641957.0	IS only present in query Strain.	1. DLIS	Complete IS hit.	-	Intergenic/Pseudo/Repeaed Region	b1558	Qin prophage; cold shock protein CspF	-	Intergenic/Pseudo/Repeaed Region	b1558	Qin prophage; cold shock protein CspF	4763752.0
1	1					438	sim5	1754106	466	sim5	35	IS30_IS30	1754106	1755326.0	NC_000913.3_art_ISs	1753605.0	1754105.0		1755327.0	1755827.0	NC_000913.3	1708428.0				1709429.0	IS only present in query Strain.	1. DLIS	Complete IS hit.	-	Intergenic/Pseudo/Repeaed Region	b1630	SoxR [2Fe-2S] reducing system protein RsxD	b1629	SoxR [2Fe-2S] reducing system protein RsxC	b1630	SoxR [2Fe-2S] reducing system protein RsxD	4763752.0
1	1					439	sim5	1766339	467	sim5	36	IS30_IS30	1766339	1767559.0	NC_000913.3_art_ISs	1765838.0	1766338.0		1767560.0	1768060.0	NC_000913.3	1719440.0				1720441.0	IS only present in query Strain.	1. DLIS	Complete IS hit.	b1640	anhydro-N-acetylmuramic acid kinase	b1642	DNA-binding transcriptional dual regulator SlyA	b1640	anhydro-N-acetylmuramic acid kinase	b1642	DNA-binding transcriptional dual regulator SlyA	4763752.0
1	1					440	sim5	1770964	468	sim5	37	IS30_IS30	1770964	1772184.0	NC_000913.3_art_ISs	1770463.0	1770963.0		1772185.0	1772685.0	NC_000913.3	1722844.0				1723845.0	IS only present in query Strain.	1. DLIS	Complete IS hit.	-	Intergenic/Pseudo/Repeaed Region	-	Intergenic/Pseudo/Repeaed Region	b1645	putative transporter YdhK	b1645	putative transporter YdhK	4763752.0
1	1					441	sim5	1788533	469	sim5	38	IS30_IS30	1788533	1789753.0	NC_000913.3_art_ISs	1788032.0	1788532.0		1789754.0	1790254.0	NC_000913.3	1739192.0				1740193.0	IS only present in query Strain.	1. DLIS	Complete IS hit.	-	Intergenic/Pseudo/Repeaed Region	b1660	putative transporter YdhC	b1659	putative LysR family DNA-binding transcriptional regulator YdhB	b1660	putative transporter YdhC	4763752.0
1	1					442	sim5	1813645	470	sim5	39	IS30_IS30	1813645	1814865.0	NC_000913.3_art_ISs	1813144.0	1813644.0		1814866.0	1815366.0	NC_000913.3	1763083.0				1764084.0	IS only present in query Strain.	1. DLIS	Complete IS hit.	-	Intergenic/Pseudo/Repeaed Region	b1684	iron-sulfur cluster insertion protein SufA	b1683	Fe-S cluster scaffold complex subunit SufB	b1684	iron-sulfur cluster insertion protein SufA	4763752.0
1	1					443	sim5	1861846	471	sim5	40	IS30_IS30	1861846	1863066.0	NC_000913.3_art_ISs	1861345.0	1861845.0		1863067.0	1863567.0	NC_000913.3	1810063.0				1811064.0	IS only present in query Strain.	1. DLIS	Complete IS hit.	-	Intergenic/Pseudo/Repeaed Region	b1729	cystine/sulfocysteine:cation symporter	-	Intergenic/Pseudo/Repeaed Region	b1729	cystine/sulfocysteine:cation symporter	4763752.0
1	1					444	sim5	1894059	472	sim5	41	IS30_IS30	1894059	1895279.0	NC_000913.3_art_ISs	1893558.0	1894058.0		1895280.0	1895780.0	NC_000913.3	1841055.0				1842056.0	IS only present in query Strain.	1. DLIS	Complete IS hit.	b1758	putative phosphatidyl transferase; inner membrane protein	b1760	DUF1496 domain-containing protein YnjH	b1758	putative phosphatidyl transferase; inner membrane protein	b1760	DUF1496 domain-containing protein YnjH	4763752.0
1	1					445	sim5	1905151	473	sim5	42	IS30_IS30	1905151	1906371.0	NC_000913.3_art_ISs	1904650.0	1905150.0		1906372.0	1906872.0	NC_000913.3	1850926.0				1851927.0	IS only present in query Strain.	1. DLIS	Complete IS hit.	-	Intergenic/Pseudo/Repeaed Region	b1768	nicotinamidase	b1767	L-asparaginase 1	b1768	nicotinamidase	4763752.0
1	1					446	sim5	1914640	474	sim5	43	IS30_IS30	1914640	1915860.0	NC_000913.3_art_ISs	1914139.0	1914639.0		1915861.0	1916361.0	NC_000913.3	1859194.0				1860195.0	IS only present in query Strain.	1. DLIS	Complete IS hit.	-	Intergenic/Pseudo/Repeaed Region	-	Intergenic/Pseudo/Repeaed Region	b1775	putative transporter YdjK	b1775	putative transporter YdjK	4763752.0
1	1					447	sim5	1936055	475	sim5	44	IS30_IS30	1936055	1937275.0	NC_000913.3_art_ISs	1935554.0	1936054.0		1937276.0	1937776.0	NC_000913.3	1879388.0				1880389.0	IS only present in query Strain.	1. DLIS	Complete IS hit.	-	Intergenic/Pseudo/Repeaed Region	b1798	leucine exporter	-	Intergenic/Pseudo/Repeaed Region	b1798	leucine exporter	4763752.0
1	1					448	sim5	1985530	476	sim5	45	IS30_IS30	1985530	1986750.0	NC_000913.3_art_ISs	1985029.0	1985529.0		1986751.0	1987251.0	NC_000913.3	1927642.0				1928643.0	IS only present in query Strain.	1. DLIS	Complete IS hit.	-	Intergenic/Pseudo/Repeaed Region	-	Intergenic/Pseudo/Repeaed Region	b1845	oligopeptidase B	b1845	oligopeptidase B	4763752.0
1	1					449	sim5	2015094	477	sim5	46	IS30_IS30	2015094	2016314.0	NC_000913.3_art_ISs	2014593.0	2015093.0		2016315.0	2016815.0	NC_000913.3	1955985.0				1956986.0	IS only present in query Strain.	1. DLIS	Complete IS hit.	-	Intergenic/Pseudo/Repeaed Region	-	Intergenic/Pseudo/Repeaed Region	b1872	trimethylamine N-oxide reductase 2	b1872	trimethylamine N-oxide reductase 2	4763752.0
1	1					450	sim5	2034609	478	sim5	47	IS30_IS30	2034609	2035829.0	NC_000913.3_art_ISs	2034108.0	2034608.0		2035830.0	2036330.0	NC_000913.3	1974279.0				1975280.0	IS only present in query Strain.	1. DLIS	Complete IS hit.	-	Intergenic/Pseudo/Repeaed Region	-	Intergenic/Pseudo/Repeaed Region	b1888	chemotaxis protein CheA	b1888	chemotaxis protein CheA	4763752.0
1	1					451	sim5	2102212	479	sim5	48	IS30_IS30	2102212	2103432.0	NC_000913.3_art_ISs	2101711.0	2102211.0		2103433.0	2103933.0	NC_000913.3	2040661.0				2041662.0	IS only present in query Strain.	1. DLIS	Complete IS hit.	b1972	periplasmic protein-L-methionine sulfoxide reductase heme binding subunit	b1973	metal-binding protein ZinT	b1972	periplasmic protein-L-methionine sulfoxide reductase heme binding subunit	b1973	metal-binding protein ZinT	4763752.0
1	1					452	sim5	2220417	480	sim5	49	IS30_IS30	2220417	2221637.0	NC_000913.3_art_ISs	2219916.0	2220416.0		2221638.0	2222138.0	NC_000913.3	2157645.0				2158646.0	IS only present in query Strain.	1. DLIS	Complete IS hit.	-	Intergenic/Pseudo/Repeaed Region	b2076	multidrug efflux pump RND permease subunit MdtC	b2075	multidrug efflux pump RND permease subunit MdtB	b2076	multidrug efflux pump RND permease subunit MdtC	4763752.0
1	1					453	sim5	2286926	481	sim5	50	IS30_IS30	2286926	2288146.0	NC_000913.3_art_ISs	2286425.0	2286925.0		2288147.0	2288647.0	NC_000913.3	2222933.0				2223934.0	IS only present in query Strain.	1. DLIS	Complete IS hit.	-	Intergenic/Pseudo/Repeaed Region	-	Intergenic/Pseudo/Repeaed Region	b2133	D-lactate dehydrogenase	-	Intergenic/Pseudo/Repeaed Region	4763752.0
1	1					454	sim5	2294111	482	sim5	51	IS30_IS30	2294111	2295331.0	NC_000913.3_art_ISs	2293610.0	2294110.0		2295332.0	2295832.0	NC_000913.3	2228897.0				2229898.0	IS only present in query Strain.	1. DLIS	Complete IS hit.	-	Intergenic/Pseudo/Repeaed Region	b2140	tRNA-dihydrouridine(16) synthase	-	Intergenic/Pseudo/Repeaed Region	b2140	tRNA-dihydrouridine(16) synthase	4763752.0
1	1					455	sim5	2317578	483	sim5	52	IS30_IS30	2317578	2318798.0	NC_000913.3_art_ISs	2317077.0	2317577.0		2318799.0	2319299.0	NC_000913.3	2251143.0				2252144.0	IS only present in query Strain.	1. DLIS	Complete IS hit.	-	Intergenic/Pseudo/Repeaed Region	b2160	putative sugar kinase YeiI	b2159	endonuclease IV	b2160	putative sugar kinase YeiI	4763752.0
1	1					456	sim5	2326348	484	sim5	53	IS30_IS30	2326348	2327568.0	NC_000913.3_art_ISs	2325847.0	2326347.0		2327569.0	2328069.0	NC_000913.3	2258692.0				2259693.0	IS only present in query Strain.	1. DLIS	Complete IS hit.	-	Intergenic/Pseudo/Repeaed Region	-	Intergenic/Pseudo/Repeaed Region	b2166	putative pseudouridine kinase	-	Intergenic/Pseudo/Repeaed Region	4763752.0
1	1					457	sim5	2688433	485	sim5	54	IS30_IS30	2688433	2689653.0	NC_000913.3_art_ISs	2687932.0	2688432.0		2689654.0	2690154.0	NC_000913.3	2619556.0				2620557.0	IS only present in query Strain.	1. DLIS	Complete IS hit.	-	Intergenic/Pseudo/Repeaed Region	b2498	uracil phosphoribosyltransferase	b2497	hypothetical protein	b2498	uracil phosphoribosyltransferase	4763752.0
1	1					458	sim5	2753018	486	sim5	55	IS30_IS30	2753018	2754238.0	NC_000913.3_art_ISs	2752517.0	2753017.0		2754239.0	2754739.0	NC_000913.3	2682920.0				2683921.0	IS only present in query Strain.	1. DLIS	Complete IS hit.	-	Intergenic/Pseudo/Repeaed Region	-	Intergenic/Pseudo/Repeaed Region	b2550	putative DNA-binding transcriptional regulator; NAGC-like	b2550	putative DNA-binding transcriptional regulator; NAGC-like	4763752.0
1	1					459	sim5	2785755	487	sim5	56	IS30_IS30	2785755	2786975.0	NC_000913.3_art_ISs	2785254.0	2785754.0		2786976.0	2787476.0	NC_000913.3	2714436.0				2715437.0	IS only present in query Strain.	1. DLIS	Complete IS hit.	-	Intergenic/Pseudo/Repeaed Region	b2578	cysteine/O-acetylserine exporter EamB	-	Intergenic/Pseudo/Repeaed Region	b2578	cysteine/O-acetylserine exporter EamB	4763752.0
1	1					460	sim5	2814728	488	sim5	57	IS30_IS30	2814728	2815948.0	NC_000913.3_art_ISs	2814227.0	2814727.0		2815949.0	2816449.0	NC_000913.3	2742188.0				2743189.0	IS only present in query Strain.	1. DLIS	Complete IS hit.	b2603	DUF4154 domain-containing protein YfiR	-	Intergenic/Pseudo/Repeaed Region	b2603	DUF4154 domain-containing protein YfiR	b2604	diguanylate cyclase DgcN	4763752.0
1	1					461	sim5	2884378	489	sim5	58	IS30_IS30	2884378	2885598.0	NC_000913.3_art_ISs	2883877.0	2884377.0		2885599.0	2886099.0	NC_000913.3	2810617.0				2811618.0	IS only present in query Strain.	1. DLIS	Complete IS hit.	b2683	L-valine exporter subunit YgaH	b2685	multidrug efflux pump membrane fusion protein EmrA	b2683	L-valine exporter subunit YgaH	b2685	multidrug efflux pump membrane fusion protein EmrA	4763752.0
1	1					462	sim5	2928412	490	sim5	59	IS30_IS30	2928412	2929632.0	NC_000913.3_art_ISs	2927911.0	2928411.0		2929633.0	2930133.0	NC_000913.3	2853430.0				2854431.0	IS only present in query Strain.	1. DLIS	Complete IS hit.	-	Intergenic/Pseudo/Repeaed Region	b2731	DNA-binding transcriptional activator FhlA	b2730	hydrogenase maturation protein; carbamoyl dehydratase	b2731	DNA-binding transcriptional activator FhlA	4763752.0
1	1					463	sim5	2964574	491	sim5	60	IS30_IS30	2964574	2965794.0	NC_000913.3_art_ISs	2964073.0	2964573.0		2965795.0	2966295.0	NC_000913.3	2888371.0				2889372.0	IS only present in query Strain.	1. DLIS	Complete IS hit.	-	Intergenic/Pseudo/Repeaed Region	-	Intergenic/Pseudo/Repeaed Region	-	Intergenic/Pseudo/Repeaed Region	b2763	sulfite reductase; hemoprotein subunit	4763752.0
1	1					464	sim5	3015301	492	sim5	61	IS30_IS30	3015301	3016521.0	NC_000913.3_art_ISs	3014800.0	3015300.0		3016522.0	3017022.0	NC_000913.3	2937877.0				2938878.0	IS only present in query Strain.	1. DLIS	Complete IS hit.	-	Intergenic/Pseudo/Repeaed Region	-	Intergenic/Pseudo/Repeaed Region	b2803	L-fuculokinase	b2803	L-fuculokinase	4763752.0
1	1					465	sim5	3104990	493	sim5	62	IS30_IS30	3104990	3106210.0	NC_000913.3_art_ISs	3104489.0	3104989.0		3106211.0	3106711.0	NC_000913.3	3026345.0				3027346.0	IS only present in query Strain.	1. DLIS	Complete IS hit.	-	Intergenic/Pseudo/Repeaed Region	b4464	guanine/hypoxanthine transporter GhxQ	b2883	guanine deaminase	b4464	guanine/hypoxanthine transporter GhxQ	4763752.0
1	1					466	sim5	3132839	494	sim5	63	IS30_IS30	3132839	3134059.0	NC_000913.3_art_ISs	3132338.0	3132838.0		3134060.0	3134560.0	NC_000913.3	3052973.0				3053974.0	IS only present in query Strain.	1. DLIS	Complete IS hit.	-	Intergenic/Pseudo/Repeaed Region	b2908	proline aminopeptidase P II	b2907	2-octaprenyl-6-methoxyphenol hydroxylase	b2908	proline aminopeptidase P II	4763752.0
1	1					467	sim5	3213386	495	sim5	64	IS30_IS30	3213386	3214606.0	NC_000913.3_art_ISs	3212885.0	3213385.0		3214607.0	3215107.0	NC_000913.3	3132299.0				3133300.0	IS only present in query Strain.	1. DLIS	Complete IS hit.	b2983	putative transport protein YghQ	b2985	putative ATP-binding protein YghS	b2983	putative transport protein YghQ	b2985	putative ATP-binding protein YghS	4763752.0
1	1					468	sim5	3227332	496	sim5	65	IS30_IS30	3227332	3228552.0	NC_000913.3_art_ISs	3226831.0	3227331.0		3228553.0	3229053.0	NC_000913.3	3145024.0				3146025.0	IS only present in query Strain.	1. DLIS	Complete IS hit.	b2996	hydrogenase 2 iron-sulfur protein	-	Intergenic/Pseudo/Repeaed Region	b2996	hydrogenase 2 iron-sulfur protein	b2997	hydrogenase 2 small subunit	4763752.0
1	1					469	sim5	3236674	497	sim5	66	IS30_IS30	3236674	3237894.0	NC_000913.3_art_ISs	3236173.0	3236673.0		3237895.0	3238395.0	NC_000913.3	3153145.0				3154146.0	IS only present in query Strain.	1. DLIS	Complete IS hit.	b3008	cystathionine beta-lyase/L-cysteine desulfhydrase	-	Intergenic/Pseudo/Repeaed Region	b3008	cystathionine beta-lyase/L-cysteine desulfhydrase	b3009	DedA family protein YghB	4763752.0
1	1					470	sim5	3250965	498	sim5	67	IS30_IS30	3250965	3252185.0	NC_000913.3_art_ISs	3250464.0	3250964.0		3252186.0	3252686.0	NC_000913.3	3166215.0				3167216.0	IS only present in query Strain.	1. DLIS	Complete IS hit.	-	Intergenic/Pseudo/Repeaed Region	-	Intergenic/Pseudo/Repeaed Region	b3020	putative deoxycholate binding periplasmic protein	b3020	putative deoxycholate binding periplasmic protein	4763752.0
1	1					471	sim5	3263731	499	sim5	68	IS30_IS30	3263731	3264951.0	NC_000913.3_art_ISs	3263230.0	3263730.0		3264952.0	3265452.0	NC_000913.3	3177760.0				3178761.0	IS only present in query Strain.	1. DLIS	Complete IS hit.	b3034	ADP-sugar pyrophosphatase	-	Intergenic/Pseudo/Repeaed Region	b3034	ADP-sugar pyrophosphatase	b3035	outer membrane channel TolC	4763752.0
1	1					472	sim5	3290948	500	sim5	69	IS30_IS30	3290948	3292168.0	NC_000913.3_art_ISs	3290447.0	3290947.0		3292169.0	3292669.0	NC_000913.3	3203756.0				3204757.0	IS only present in query Strain.	1. DLIS	Complete IS hit.	b3057	undecaprenyl pyrophosphate phosphatase	b3059	putative glycerol-3-phosphate acyltransferase	b3057	undecaprenyl pyrophosphate phosphatase	b3059	putative glycerol-3-phosphate acyltransferase	4763752.0
1	1					473	sim5	3476572	501	sim5	70	IS30_IS30	3476572	3477792.0	NC_000913.3_art_ISs	3476071.0	3476571.0		3477793.0	3478293.0	NC_000913.3	3388159.0				3389160.0	IS only present in query Strain.	1. DLIS	Complete IS hit.	b3240	aromatic carboxylic acid efflux pump subunit AaeB	b3242	DUF1656 domain-containing protein AaeX	b3240	aromatic carboxylic acid efflux pump subunit AaeB	b3242	DUF1656 domain-containing protein AaeX	4763752.0
1	1					474	sim5	3489855	502	sim5	71	IS30_IS30	3489855	3491075.0	NC_000913.3_art_ISs	3489354.0	3489854.0		3491076.0	3491576.0	NC_000913.3	3400221.0				3401222.0	IS only present in query Strain.	1. DLIS	Complete IS hit.	-	Intergenic/Pseudo/Repeaed Region	-	Intergenic/Pseudo/Repeaed Region	b3251	dynamic cytoskeletal protein MreB	-	Intergenic/Pseudo/Repeaed Region	4763752.0
1	1					475	sim5	3556328	503	sim5	72	IS30_IS30	3556328	3557548.0	NC_000913.3_art_ISs	3555827.0	3556327.0		3557549.0	3558049.0	NC_000913.3	3465473.0				3466474.0	IS only present in query Strain.	1. DLIS	Complete IS hit.	b3334	Type II secretion system protein GspM	b3336	bacterioferritin	b3334	Type II secretion system protein GspM	b3336	bacterioferritin	4763752.0
1	1					476	sim5	3609236	504	sim5	73	IS30_IS30	3609236	3610456.0	NC_000913.3_art_ISs	3608735.0	3609235.0		3610457.0	3610957.0	NC_000913.3	3517160.0				3518161.0	IS only present in query Strain.	1. DLIS	Complete IS hit.	b3388	cell division protein DamX	-	Intergenic/Pseudo/Repeaed Region	b3388	cell division protein DamX	b3389	3-dehydroquinate synthase	4763752.0
1	1					477	sim5	3726458	505	sim5	74	IS30_IS30	3726458	3727678.0	NC_000913.3_art_ISs	3725957.0	3726457.0		3727679.0	3728179.0	NC_000913.3	3633161.0				3634162.0	IS only present in query Strain.	1. DLIS	Complete IS hit.	-	Intergenic/Pseudo/Repeaed Region	-	Intergenic/Pseudo/Repeaed Region	b4660	putative uncharacterized protein YhiL	b4660	putative uncharacterized protein YhiL	4763752.0
1	1					478	sim5	3777363	506	sim5	75	IS30_IS30	3777363	3778583.0	NC_000913.3_art_ISs	3776862.0	3777362.0		3778584.0	3779084.0	NC_000913.3	3682845.0				3683846.0	IS only present in query Strain.	1. DLIS	Complete IS hit.	-	Intergenic/Pseudo/Repeaed Region	b3529	putative c-di-GMP phosphodiesterase PdeK	b3528	C4 dicarboxylate/orotate:H(+) symporter	b3529	putative c-di-GMP phosphodiesterase PdeK	4763752.0
1	1					479	sim5	3912661	507	sim5	76	IS30_IS30	3912661	3913881.0	NC_000913.3_art_ISs	3912160.0	3912660.0		3913882.0	3914382.0	NC_000913.3	3816922.0				3817923.0	IS only present in query Strain.	1. DLIS	Complete IS hit.	-	Intergenic/Pseudo/Repeaed Region	b3645	DNA damage-inducible protein D	b3644	UPF0701 family protein YicC	b3645	DNA damage-inducible protein D	4763752.0
1	1					480	sim5	3935398	508	sim5	77	IS30_IS30	3935398	3936618.0	NC_000913.3_art_ISs	3934897.0	3935397.0		3936619.0	3937119.0	NC_000913.3	3838438.0				3839439.0	IS only present in query Strain.	1. DLIS	Complete IS hit.	-	Intergenic/Pseudo/Repeaed Region	b3661	lipoprotein-28	b3660	putative inner membrane protein	b3661	lipoprotein-28	4763752.0
1	1					481	sim5	3987218	509	sim5	78	IS30_IS30	3987218	3988438.0	NC_000913.3_art_ISs	3986717.0	3987217.0		3988439.0	3988939.0	NC_000913.3	3889037.0				3890038.0	IS only present in query Strain.	1. DLIS	Complete IS hit.	-	Intergenic/Pseudo/Repeaed Region	-	Intergenic/Pseudo/Repeaed Region	b3708	tryptophanase	b3708	tryptophanase	4763752.0
1	1					482	sim5	3998497	510	sim5	79	IS30_IS30	3998497	3999717.0	NC_000913.3_art_ISs	3997996.0	3998496.0		3999718.0	4000218.0	NC_000913.3	3899095.0				3900096.0	IS only present in query Strain.	1. DLIS	Complete IS hit.	b3718	putative glucosamine-6-phosphate deaminase YieK	-	Intergenic/Pseudo/Repeaed Region	b3718	putative glucosamine-6-phosphate deaminase YieK	b3719	putative hydrolase YieL	4763752.0
1	1					483	sim5	4080631	511	sim5	80	IS30_IS30	4080631	4081851.0	NC_000913.3_art_ISs	4080130.0	4080630.0		4081852.0	4082352.0	NC_000913.3	3980008.0				3981009.0	IS only present in query Strain.	1. DLIS	Complete IS hit.	-	Intergenic/Pseudo/Repeaed Region	-	Intergenic/Pseudo/Repeaed Region	b3794	UDP-N-acetyl-D-mannosaminuronic acid transferase	b3795	putative transporter YifK	4763752.0
1	1					484	sim5	4082925	512	sim5	81	IS30_IS30	4082925	4084145.0	NC_000913.3_art_ISs	4082424.0	4082924.0		4084146.0	4084646.0	NC_000913.3	3981081.0				3982082.0	IS only present in query Strain.	1. DLIS	Complete IS hit.	-	Intergenic/Pseudo/Repeaed Region	-	Intergenic/Pseudo/Repeaed Region	b3795	putative transporter YifK	b3795	putative transporter YifK	4763752.0
1	1					485	sim5	4092408	513	sim5	82	IS30_IS30	4092408	4093628.0	NC_000913.3_art_ISs	4091907.0	4092407.0		4093629.0	4094129.0	NC_000913.3	3989343.0				3990344.0	IS only present in query Strain.	1. DLIS	Complete IS hit.	b3804	uroporphyrinogen-III synthase	-	Intergenic/Pseudo/Repeaed Region	b3804	uroporphyrinogen-III synthase	b3805	hydroxymethylbilane synthase	4763752.0
1	1					486	sim5	4109297	514	sim5	83	IS30_IS30	4109297	4110517.0	NC_000913.3_art_ISs	4108796.0	4109296.0		4110518.0	4111018.0	NC_000913.3	4005011.0				4006012.0	IS only present in query Strain.	1. DLIS	Complete IS hit.	-	Intergenic/Pseudo/Repeaed Region	b3822	ATP-dependent DNA helicase RecQ	b3821	outer membrane phospholipase A	b3822	ATP-dependent DNA helicase RecQ	4763752.0
1	1					487	sim5	4122593	515	sim5	84	IS30_IS30	4122593	4123813.0	NC_000913.3_art_ISs	4122092.0	4122592.0		4123814.0	4124314.0	NC_000913.3	4017086.0				4018087.0	IS only present in query Strain.	1. DLIS	Complete IS hit.	b3831	uridine phosphorylase	-	Intergenic/Pseudo/Repeaed Region	b3831	uridine phosphorylase	b3832	putative recombination limiting protein RmuC	4763752.0
1	1					488	sim5	4135317	516	sim5	85	IS30_IS30	4135317	4136537.0	NC_000913.3_art_ISs	4134816.0	4135316.0		4136538.0	4137038.0	NC_000913.3	4028589.0				4029590.0	IS only present in query Strain.	1. DLIS	Complete IS hit.	b3845	3-ketoacyl-CoA thiolase	-	Intergenic/Pseudo/Repeaed Region	b3845	3-ketoacyl-CoA thiolase	b3846	dodecenoyl-CoA delta-isomerase; enoyl-CoA hydratase; 3-hydroxybutyryl-CoA epimerase; 3-hydroxyacyl-CoA dehydrogenase	4763752.0
1	1					489	sim5	4187157	517	sim5	86	IS30_IS30	4187157	4188377.0	NC_000913.3_art_ISs	4186656.0	4187156.0		4188378.0	4188878.0	NC_000913.3	4079208.0				4080209.0	IS only present in query Strain.	1. DLIS	Complete IS hit.	-	Intergenic/Pseudo/Repeaed Region	-	Intergenic/Pseudo/Repeaed Region	-	Intergenic/Pseudo/Repeaed Region	-	Intergenic/Pseudo/Repeaed Region	4763752.0
1	1					490	sim5	4194136	518	sim5	87	IS30_IS30	4194136	4195356.0	NC_000913.3_art_ISs	4193635.0	4194135.0		4195357.0	4195857.0	NC_000913.3	4084966.0				4085967.0	IS only present in query Strain.	1. DLIS	Complete IS hit.	-	Intergenic/Pseudo/Repeaed Region	-	Intergenic/Pseudo/Repeaed Region	b3894	formate dehydrogenase O subunit alpha	-	Intergenic/Pseudo/Repeaed Region	4763752.0
1	1					493	sim5	4244761	519	sim5	88	IS30_IS30	4244761	4245981.0	NC_000913.3_art_ISs	4244260.0	4244760.0		4245982.0	4246482.0	NC_000913.3	4131928.0				4132929.0	IS only present in query Strain.	1. DLIS	Complete IS hit.	b3940	fused aspartate kinase/homoserine dehydrogenase 2	b3941	5;10-methylenetetrahydrofolate reductase	b3940	fused aspartate kinase/homoserine dehydrogenase 2	b3941	5;10-methylenetetrahydrofolate reductase	4763752.0
1	1					494	sim5	4260349	520	sim5	89	IS30_IS30	4260349	4261569.0	NC_000913.3_art_ISs	4259848.0	4260348.0		4261570.0	4262070.0	NC_000913.3	4146295.0				4147296.0	IS only present in query Strain.	1. DLIS	Complete IS hit.	-	Intergenic/Pseudo/Repeaed Region	b3953	putative PTS enzyme IIB component FrwD	b3952	putative pyruvate formate-lyase 2 activating enzyme PflC	b3953	putative PTS enzyme IIB component FrwD	4763752.0
1	1					495	sim5	4364720	521	sim5	90	IS30_IS30	4364720	4365940.0	NC_000913.3_art_ISs	4364219.0	4364719.0		4365941.0	4366441.0	NC_000913.3	4249445.0				4250446.0	IS only present in query Strain.	1. DLIS	Complete IS hit.	-	Intergenic/Pseudo/Repeaed Region	-	Intergenic/Pseudo/Repeaed Region	-	Intergenic/Pseudo/Repeaed Region	b4037	maltose regulon periplasmic protein	4763752.0
1	1					496	sim5	4447258	522	sim5	91	IS30_IS30	4447258	4448478.0	NC_000913.3_art_ISs	4446757.0	4447257.0		4448479.0	4448979.0	NC_000913.3	4330762.0				4331763.0	IS only present in query Strain.	1. DLIS	Complete IS hit.	-	Intergenic/Pseudo/Repeaed Region	-	Intergenic/Pseudo/Repeaed Region	b4111	osmolyte:H(+) symporter ProP	b4111	osmolyte:H(+) symporter ProP	4763752.0
1	1					497	sim5	4535600	523	sim5	92	IS30_IS30	4535600	4536820.0	NC_000913.3_art_ISs	4535099.0	4535599.0		4536821.0	4537321.0	NC_000913.3	4417883.0				4418884.0	IS only present in query Strain.	1. DLIS	Complete IS hit.	-	Intergenic/Pseudo/Repeaed Region	b4192	L-ascorbate-6-phosphate lactonase	b4191	DNA-binding transcriptional repressor UlaR	b4192	L-ascorbate-6-phosphate lactonase	4763752.0
1	1					498	sim5	4552016	524	sim5	93	IS30_IS30	4552016	4553236.0	NC_000913.3_art_ISs	4551515.0	4552015.0		4553237.0	4553737.0	NC_000913.3	4433078.0				4434079.0	IS only present in query Strain.	1. DLIS	Complete IS hit.	-	Intergenic/Pseudo/Repeaed Region	-	Intergenic/Pseudo/Repeaed Region	-	Intergenic/Pseudo/Repeaed Region	-	Intergenic/Pseudo/Repeaed Region	4763752.0
1	1					499	sim5	4576388	525	sim5	94	IS30_IS30	4576388	4577608.0	NC_000913.3_art_ISs	4575887.0	4576387.0		4577609.0	4578109.0	NC_000913.3	4456229.0				4457230.0	IS only present in query Strain.	1. DLIS	Complete IS hit.	-	Intergenic/Pseudo/Repeaed Region	-	Intergenic/Pseudo/Repeaed Region	b4233	UDP-N-acetylmuramate--L-alanyl-gamma-D-glutamyl- meso-2;6-diaminoheptanedioate ligase	-	Intergenic/Pseudo/Repeaed Region	4763752.0
1	1					500	sim5	4597836	526	sim5	95	IS30_IS30	4597836	4599056.0	NC_000913.3_art_ISs	4597335.0	4597835.0		4599057.0	4599557.0	NC_000913.3	4476456.0				4477457.0	IS only present in query Strain.	1. DLIS	Complete IS hit.	-	Intergenic/Pseudo/Repeaed Region	b4254	ornithine carbamoyltransferase ArgI	b4253	protein YjgL	b4254	ornithine carbamoyltransferase ArgI	4763752.0
1	1					501	sim6	15796	537	sim6	0	IS30_IS30	15796	17016.0	NC_000913.3_art_ISs	15295.0	15795.0		17017.0	17517.0	NC_000913.3	15295.0				16296.0	IS only present in query Strain.	1. DLIS	Complete IS hit.	b0015	chaperone protein DnaJ	-	Intergenic/Pseudo/Repeaed Region	b0015	chaperone protein DnaJ	b0016	IS186/IS421 transposase	4763752.0
1	1					502	sim6	109346	538	sim6	1	IS30_IS30	109346	110566.0	NC_000913.3_art_ISs	108845.0	109345.0		110567.0	111067.0	NC_000913.3	107624.0				108625.0	IS only present in query Strain.	1. DLIS	Complete IS hit.	-	Intergenic/Pseudo/Repeaed Region	b0098	protein translocation ATPase	-	Intergenic/Pseudo/Repeaed Region	b0098	protein translocation ATPase	4763752.0
1	1					503	sim6	119049	539	sim6	2	IS30_IS30	119049	120269.0	NC_000913.3_art_ISs	118548.0	119048.0		120270.0	120770.0	NC_000913.3	116106.0				117107.0	IS only present in query Strain.	1. DLIS	Complete IS hit.	-	Intergenic/Pseudo/Repeaed Region	-	Intergenic/Pseudo/Repeaed Region	b0107	T2SSE family protein	-	Intergenic/Pseudo/Repeaed Region	4763752.0
1	1					504	sim6	161650	540	sim6	3	IS30_IS30	161650	162870.0	NC_000913.3_art_ISs	161149.0	161649.0		162871.0	163371.0	NC_000913.3	157486.0				158487.0	IS only present in query Strain.	1. DLIS	Complete IS hit.	b0142	2-amino-4-hydroxy-6- hydroxymethyldihydropteridine diphosphokinase	-	Intergenic/Pseudo/Repeaed Region	b0142	2-amino-4-hydroxy-6- hydroxymethyldihydropteridine diphosphokinase	b0143	poly(A) polymerase I	4763752.0
1	1					505	sim6	164003	541	sim6	4	IS30_IS30	164003	165223.0	NC_000913.3_art_ISs	163502.0	164002.0		165224.0	165724.0	NC_000913.3	158618.0				159619.0	IS only present in query Strain.	1. DLIS	Complete IS hit.	-	Intergenic/Pseudo/Repeaed Region	b0144	glutamyl-Q tRNA(Asp) synthetase	b0143	poly(A) polymerase I	b0144	glutamyl-Q tRNA(Asp) synthetase	4763752.0
1	1					506	sim6	204259	542	sim6	5	IS30_IS30	204259	205479.0	NC_000913.3_art_ISs	203758.0	204258.0		205480.0	205980.0	NC_000913.3	197653.0				198654.0	IS only present in query Strain.	1. DLIS	Complete IS hit.	b0176	intramembrane zinc metalloprotease	-	Intergenic/Pseudo/Repeaed Region	b0176	intramembrane zinc metalloprotease	b0177	outer membrane protein assembly factor BamA	4763752.0
1	1					507	sim6	264860	543	sim6	6	IS30_IS30	264860	266080.0	NC_000913.3_art_ISs	264359.0	264859.0		266081.0	266581.0	NC_000913.3	257033.0				258034.0	IS only present in query Strain.	1. DLIS	Complete IS hit.	-	Intergenic/Pseudo/Repeaed Region	b4710	IS1 transposase B	b0239	fermentation-respiration switch protein	b4710	IS1 transposase B	4763752.0
1	1					510	sim6	333377	544	sim6	7	IS30_IS30	333377	334597.0	NC_000913.3_art_ISs	332876.0	333376.0		334598.0	335098.0	NC_000913.3	321887.0				322888.0	IS only present in query Strain.	1. DLIS	Complete IS hit.	b0306	putative lactate utilization oxidoreductase YkgE	-	Intergenic/Pseudo/Repeaed Region	b0306	putative lactate utilization oxidoreductase YkgE	b0307	putative amino acid dehydrogenase with NAD(P)-binding domain and ferridoxin-like domain	4763752.0
1	1					511	sim6	351943	545	sim6	8	IS30_IS30	351943	353163.0	NC_000913.3_art_ISs	351442.0	351942.0		353164.0	353664.0	NC_000913.3	339232.0				340233.0	IS only present in query Strain.	1. DLIS	Complete IS hit.	-	Intergenic/Pseudo/Repeaed Region	b0323	carbamate kinase-like protein YahI	b0321	DUF1116 domain-containing protein YahG	b0323	carbamate kinase-like protein YahI	4763752.0
1	1					512	sim6	376550	546	sim6	9	IS30_IS30	376550	377770.0	NC_000913.3_art_ISs	376049.0	376549.0		377771.0	378271.0	NC_000913.3	362618.0				363619.0	IS only present in query Strain.	1. DLIS	Complete IS hit.	-	Intergenic/Pseudo/Repeaed Region	b0344	beta-galactosidase	b0343	lactose permease	b0344	beta-galactosidase	4763752.0
1	1					513	sim6	389615	547	sim6	10	IS30_IS30	389615	390835.0	NC_000913.3_art_ISs	389114.0	389614.0		390836.0	391336.0	NC_000913.3	374462.0				375463.0	IS only present in query Strain.	1. DLIS	Complete IS hit.	b0352	4-hydroxy-2-oxovalerate aldolase	b0353	3-hydroxyphenylpropionate/3- hydroxycinnamate:H(+) symporter	b0352	4-hydroxy-2-oxovalerate aldolase	b0353	3-hydroxyphenylpropionate/3- hydroxycinnamate:H(+) symporter	4763752.0
1	1					514	sim6	416776	548	sim6	11	IS30_IS30	416776	417996.0	NC_000913.3_art_ISs	416275.0	416775.0		417997.0	418497.0	NC_000913.3	400402.0				401403.0	IS only present in query Strain.	1. DLIS	Complete IS hit.	-	Intergenic/Pseudo/Repeaed Region	b0382	anti-adaptor protein for sigma(S) stabilization	b0381	D-alanine--D-alanine ligase A	b0382	anti-adaptor protein for sigma(S) stabilization	4763752.0
1	1					515	sim6	427088	549	sim6	12	IS30_IS30	427088	428308.0	NC_000913.3_art_ISs	426587.0	427087.0		428309.0	428809.0	NC_000913.3	409493.0				410494.0	IS only present in query Strain.	1. DLIS	Complete IS hit.	-	Intergenic/Pseudo/Repeaed Region	b0394	manno(fructo)kinase	b0393	nucleoid-associated protein RdgC	b0394	manno(fructo)kinase	4763752.0
1	1					516	sim6	467923	550	sim6	13	IS30_IS30	467923	469143.0	NC_000913.3_art_ISs	467422.0	467922.0		469144.0	469644.0	NC_000913.3	449107.0				450108.0	IS only present in query Strain.	1. DLIS	Complete IS hit.	-	Intergenic/Pseudo/Repeaed Region	-	Intergenic/Pseudo/Repeaed Region	b0431	cytochrome bo3 ubiquinol oxidase subunit 1	b0431	cytochrome bo3 ubiquinol oxidase subunit 1	4763752.0
1	1					517	sim6	588773	551	sim6	14	IS30_IS30	588773	589993.0	NC_000913.3_art_ISs	588272.0	588772.0		589994.0	590494.0	NC_000913.3	568736.0				569737.0	IS only present in query Strain.	1. DLIS	Complete IS hit.	b4733	protein YlcJ	-	Intergenic/Pseudo/Repeaed Region	b4733	protein YlcJ	b0544	DLP12 prophage; putative recombinase	4763752.0
1	1					518	sim6	637182	552	sim6	15	IS30_IS30	637182	638402.0	NC_000913.3_art_ISs	636681.0	637181.0		638403.0	638903.0	NC_000913.3	615924.0				616925.0	IS only present in query Strain.	1. DLIS	Complete IS hit.	-	Intergenic/Pseudo/Repeaed Region	-	Intergenic/Pseudo/Repeaed Region	b0586	apo-serine activating enzyme	b0586	apo-serine activating enzyme	4763752.0
1	1					519	sim6	664149	553	sim6	16	IS30_IS30	664149	665369.0	NC_000913.3_art_ISs	663648.0	664148.0		665370.0	665870.0	NC_000913.3	641670.0				642671.0	IS only present in query Strain.	1. DLIS	Complete IS hit.	b0607	universal stress protein G	-	Intergenic/Pseudo/Repeaed Region	b0607	universal stress protein G	b0608	putative Zn(2(+))-dependent alcohol dehydrogenase YbdR	4763752.0
1	1					520	sim6	913781	554	sim6	17	IS30_IS30	913781	915001.0	NC_000913.3_art_ISs	913280.0	913780.0		915002.0	915502.0	NC_000913.3	890081.0				891082.0	IS only present in query Strain.	1. DLIS	Complete IS hit.	-	Intergenic/Pseudo/Repeaed Region	b0850	DUF1418 domain-containing protein YbjC	-	Intergenic/Pseudo/Repeaed Region	b0850	DUF1418 domain-containing protein YbjC	4763752.0
1	1					521	sim6	942389	555	sim6	18	IS30_IS30	942389	943609.0	NC_000913.3_art_ISs	941888.0	942388.0		943610.0	944110.0	NC_000913.3	917468.0				918469.0	IS only present in query Strain.	1. DLIS	Complete IS hit.	-	Intergenic/Pseudo/Repeaed Region	b0877	DUF535 domain-containing protein YbjX	b0876	DUF2813 domain-containing protein YbjD	b0877	DUF535 domain-containing protein YbjX	4763752.0
1	1					522	sim6	964196	556	sim6	19	IS30_IS30	964196	965416.0	NC_000913.3_art_ISs	963695.0	964195.0		965417.0	965917.0	NC_000913.3	938054.0				939055.0	IS only present in query Strain.	1. DLIS	Complete IS hit.	-	Intergenic/Pseudo/Repeaed Region	-	Intergenic/Pseudo/Repeaed Region	b0892	recombination factor	b0892	recombination factor	4763752.0
1	1					523	sim6	1085611	557	sim6	20	IS30_IS30	1085611	1086831.0	NC_000913.3_art_ISs	1085110.0	1085610.0		1086832.0	1087332.0	NC_000913.3	1058248.0				1059249.0	IS only present in query Strain.	1. DLIS	Complete IS hit.	-	Intergenic/Pseudo/Repeaed Region	-	Intergenic/Pseudo/Repeaed Region	b0996	cytochrome c menaquinol dehydrogenase TorC	b0996	cytochrome c menaquinol dehydrogenase TorC	4763752.0
1	1					524	sim6	1139858	558	sim6	21	IS30_IS30	1139858	1141078.0	NC_000913.3_art_ISs	1139357.0	1139857.0		1141079.0	1141579.0	NC_000913.3	1111274.0				1112275.0	IS only present in query Strain.	1. DLIS	Complete IS hit.	-	Intergenic/Pseudo/Repeaed Region	-	Intergenic/Pseudo/Repeaed Region	b1049	osmoregulated periplasmic glucans (OPGs) biosynthesis protein H	b1049	osmoregulated periplasmic glucans (OPGs) biosynthesis protein H	4763752.0
1	1					525	sim6	1287899	559	sim6	22	IS30_IS30	1287899	1289119.0	NC_000913.3_art_ISs	1287398.0	1287898.0		1289120.0	1289620.0	NC_000913.3	1258094.0				1259095.0	IS only present in query Strain.	1. DLIS	Complete IS hit.	b1204	peptidyl-tRNA hydrolase	-	Intergenic/Pseudo/Repeaed Region	b1204	peptidyl-tRNA hydrolase	-	Intergenic/Pseudo/Repeaed Region	4763752.0
1	1					528	sim6	1375409	560	sim6	23	IS30_IS30	1375409	1376629.0	NC_000913.3_art_ISs	1374908.0	1375408.0		1376630.0	1377130.0	NC_000913.3	1341941.0				1342942.0	IS only present in query Strain.	1. DLIS	Complete IS hit.	-	Intergenic/Pseudo/Repeaed Region	b1282	putative translation factor	b1281	orotidine-5'-phosphate decarboxylase	b1282	putative translation factor	4763752.0
1	1					529	sim6	1389972	561	sim6	24	IS30_IS30	1389972	1391192.0	NC_000913.3_art_ISs	1389471.0	1389971.0		1391193.0	1391693.0	NC_000913.3	1355283.0				1356284.0	IS only present in query Strain.	1. DLIS	Complete IS hit.	b1293	putrescine ABC exporter membrane subunit SapB	-	Intergenic/Pseudo/Repeaed Region	b1293	putrescine ABC exporter membrane subunit SapB	b1294	putative periplasmic binding protein SapA	4763752.0
1	1					530	sim6	1404885	562	sim6	25	IS30_IS30	1404885	1406105.0	NC_000913.3_art_ISs	1404384.0	1404884.0		1406106.0	1406606.0	NC_000913.3	1368975.0				1369976.0	IS only present in query Strain.	1. DLIS	Complete IS hit.	b1305	phage shock protein B	b1308	thiosulfate sulfurtransferase PspE	b1305	phage shock protein B	b1308	thiosulfate sulfurtransferase PspE	4763752.0
1	1					531	sim6	1434627	563	sim6	26	IS30_IS30	1434627	1435847.0	NC_000913.3_art_ISs	1434126.0	1434626.0		1435848.0	1436348.0	NC_000913.3	1397496.0				1398497.0	IS only present in query Strain.	1. DLIS	Complete IS hit.	b1332	DUF2534 domain-containing protein YnaJ	-	Intergenic/Pseudo/Repeaed Region	b1332	DUF2534 domain-containing protein YnaJ	b1333	universal stress protein with a role cellular motility	4763752.0
1	1					532	sim6	1491879	564	sim6	27	IS30_IS30	1491879	1493099.0	NC_000913.3_art_ISs	1491378.0	1491878.0		1493100.0	1493600.0	NC_000913.3	1453527.0				1454528.0	IS only present in query Strain.	1. DLIS	Complete IS hit.	b1387	oxepin-CoA hydrolase/3-oxo-5;6-dehydrosuberyl-CoA semialdehyde dehydrogenase	-	Intergenic/Pseudo/Repeaed Region	b1387	oxepin-CoA hydrolase/3-oxo-5;6-dehydrosuberyl-CoA semialdehyde dehydrogenase	b1388	phenylacetyl-CoA 1;2-epoxidase; monooxygenase subunit	4763752.0
1	1					533	sim6	1524045	565	sim6	28	IS30_IS30	1524045	1525265.0	NC_000913.3_art_ISs	1523544.0	1524044.0		1525266.0	1525766.0	NC_000913.3	1484472.0				1485473.0	IS only present in query Strain.	1. DLIS	Complete IS hit.	-	Intergenic/Pseudo/Repeaed Region	-	Intergenic/Pseudo/Repeaed Region	b1413	ATP-dependent RNA helicase HrpA	b1413	ATP-dependent RNA helicase HrpA	4763752.0
1	1					534	sim6	1530469	566	sim6	29	IS30_IS30	1530469	1531689.0	NC_000913.3_art_ISs	1529968.0	1530468.0		1531690.0	1532190.0	NC_000913.3	1489675.0				1490676.0	IS only present in query Strain.	1. DLIS	Complete IS hit.	-	Intergenic/Pseudo/Repeaed Region	-	Intergenic/Pseudo/Repeaed Region	-	Intergenic/Pseudo/Repeaed Region	b4493	glyceraldehyde-3-phosphate dehydrogenase	4763752.0
1	1					535	sim6	1621724	567	sim6	30	IS30_IS30	1621724	1622944.0	NC_000913.3_art_ISs	1621223.0	1621723.0		1622945.0	1623445.0	NC_000913.3	1579709.0				1580710.0	IS only present in query Strain.	1. DLIS	Complete IS hit.	-	Intergenic/Pseudo/Repeaed Region	-	Intergenic/Pseudo/Repeaed Region	b1497	putative anaerobic sulfatase maturation enzyme YdeM	b1497	putative anaerobic sulfatase maturation enzyme YdeM	4763752.0
1	1					536	sim6	1718922	568	sim6	31	IS30_IS30	1718922	1720142.0	NC_000913.3_art_ISs	1718421.0	1718921.0		1720143.0	1720643.0	NC_000913.3	1675686.0				1676687.0	IS only present in query Strain.	1. DLIS	Complete IS hit.	-	Intergenic/Pseudo/Repeaed Region	b1603	pyridine nucleotide transhydrogenase subunit alpha	b1602	pyridine nucleotide transhydrogenase subunit beta	b1603	pyridine nucleotide transhydrogenase subunit alpha	4763752.0
1	1					537	sim6	1722833	569	sim6	32	IS30_IS30	1722833	1724053.0	NC_000913.3_art_ISs	1722332.0	1722832.0		1724054.0	1724554.0	NC_000913.3	1678376.0				1679377.0	IS only present in query Strain.	1. DLIS	Complete IS hit.	-	Intergenic/Pseudo/Repeaed Region	-	Intergenic/Pseudo/Repeaed Region	-	Intergenic/Pseudo/Repeaed Region	-	Intergenic/Pseudo/Repeaed Region	4763752.0
1	1					538	sim6	1724574	570	sim6	33	IS30_IS30	1724574	1725794.0	NC_000913.3_art_ISs	1724073.0	1724573.0		1725795.0	1726295.0	NC_000913.3	1678896.0				1679897.0	IS only present in query Strain.	1. DLIS	Complete IS hit.	-	Intergenic/Pseudo/Repeaed Region	b1605	putative arginine:ornithine antiporter	b1604	DUF1471 domain-containing protein YdgH	b1605	putative arginine:ornithine antiporter	4763752.0
1	1					539	sim6	1742128	571	sim6	34	IS30_IS30	1742128	1743348.0	NC_000913.3_art_ISs	1741627.0	1742127.0		1743349.0	1743849.0	NC_000913.3	1695229.0				1696230.0	IS only present in query Strain.	1. DLIS	Complete IS hit.	-	Intergenic/Pseudo/Repeaed Region	-	Intergenic/Pseudo/Repeaed Region	b1617	beta-glucuronidase	-	Intergenic/Pseudo/Repeaed Region	4763752.0
1	1					540	sim6	1776446	572	sim6	35	IS30_IS30	1776446	1777666.0	NC_000913.3_art_ISs	1775945.0	1776445.0		1777667.0	1778167.0	NC_000913.3	1728326.0				1729327.0	IS only present in query Strain.	1. DLIS	Complete IS hit.	-	Intergenic/Pseudo/Repeaed Region	b1653	putative ATP-dependent helicase Lhr	-	Intergenic/Pseudo/Repeaed Region	b1653	putative ATP-dependent helicase Lhr	4763752.0
1	1					541	sim6	1801751	573	sim6	36	IS30_IS30	1801751	1802971.0	NC_000913.3_art_ISs	1801250.0	1801750.0		1802972.0	1803472.0	NC_000913.3	1752410.0				1753411.0	IS only present in query Strain.	1. DLIS	Complete IS hit.	-	Intergenic/Pseudo/Repeaed Region	-	Intergenic/Pseudo/Repeaed Region	b1673	putative oxidoreductase	b1673	putative oxidoreductase	4763752.0
1	1					542	sim6	1846232	574	sim6	37	IS30_IS30	1846232	1847452.0	NC_000913.3_art_ISs	1845731.0	1846231.0		1847453.0	1847953.0	NC_000913.3	1795670.0				1796671.0	IS only present in query Strain.	1. DLIS	Complete IS hit.	-	Intergenic/Pseudo/Repeaed Region	-	Intergenic/Pseudo/Repeaed Region	b1713	phenylalanine--tRNA ligase subunit beta	b1713	phenylalanine--tRNA ligase subunit beta	4763752.0
1	1					543	sim6	1848569	575	sim6	38	IS30_IS30	1848569	1849789.0	NC_000913.3_art_ISs	1848068.0	1848568.0		1849790.0	1850290.0	NC_000913.3	1796786.0				1797787.0	IS only present in query Strain.	1. DLIS	Complete IS hit.	-	Intergenic/Pseudo/Repeaed Region	-	Intergenic/Pseudo/Repeaed Region	b1713	phenylalanine--tRNA ligase subunit beta	b1713	phenylalanine--tRNA ligase subunit beta	4763752.0
1	1					544	sim6	1876024	576	sim6	39	IS30_IS30	1876024	1877244.0	NC_000913.3_art_ISs	1875523.0	1876023.0		1877245.0	1877745.0	NC_000913.3	1823020.0				1824021.0	IS only present in query Strain.	1. DLIS	Complete IS hit.	b1740	NAD synthetase; NH3-dependent	-	Intergenic/Pseudo/Repeaed Region	b1740	NAD synthetase; NH3-dependent	b1741	endonuclease of nucleotide excision repair	4763752.0
1	1					545	sim6	1965367	577	sim6	40	IS30_IS30	1965367	1966587.0	NC_000913.3_art_ISs	1964866.0	1965366.0		1966588.0	1967088.0	NC_000913.3	1911142.0				1912143.0	IS only present in query Strain.	1. DLIS	Complete IS hit.	-	Intergenic/Pseudo/Repeaed Region	b1829	zinc dependent endoprotease	b1828	putative transporter YebQ	b1829	zinc dependent endoprotease	4763752.0
1	1					546	sim6	2013991	578	sim6	41	IS30_IS30	2013991	2015211.0	NC_000913.3_art_ISs	2013490.0	2013990.0		2015212.0	2015712.0	NC_000913.3	1958545.0				1959546.0	IS only present in query Strain.	1. DLIS	Complete IS hit.	-	Intergenic/Pseudo/Repeaed Region	b1875	putative metal-binding enzyme YecM	b1874	protein CutC	b1875	putative metal-binding enzyme YecM	4763752.0
1	1					547	sim6	2035892	579	sim6	42	IS30_IS30	2035892	2037112.0	NC_000913.3_art_ISs	2035391.0	2035891.0		2037113.0	2037613.0	NC_000913.3	1979225.0				1980226.0	IS only present in query Strain.	1. DLIS	Complete IS hit.	-	Intergenic/Pseudo/Repeaed Region	b1896	trehalose-6-phosphate synthase	-	Intergenic/Pseudo/Repeaed Region	b1896	trehalose-6-phosphate synthase	4763752.0
1	1					548	sim6	2048866	580	sim6	43	IS30_IS30	2048866	2050086.0	NC_000913.3_art_ISs	2048365.0	2048865.0		2050087.0	2050587.0	NC_000913.3	1990978.0				1991979.0	IS only present in query Strain.	1. DLIS	Complete IS hit.	-	Intergenic/Pseudo/Repeaed Region	-	Intergenic/Pseudo/Repeaed Region	b1908	UPF0149 family protein YecA	-	Intergenic/Pseudo/Repeaed Region	4763752.0
1	1					549	sim6	2162094	581	sim6	44	IS30_IS30	2162094	2163314.0	NC_000913.3_art_ISs	2161593.0	2162093.0		2163315.0	2163815.0	NC_000913.3	2102985.0				2103986.0	IS only present in query Strain.	1. DLIS	Complete IS hit.	b4571	interrupted rhamnosyltransferase WbbL	-	Intergenic/Pseudo/Repeaed Region	b4571	interrupted rhamnosyltransferase WbbL	b2032	putative lipopolysaccharide biosynthesis protein	4763752.0
1	1					550	sim6	2180351	582	sim6	45	IS30_IS30	2180351	2181571.0	NC_000913.3_art_ISs	2179850.0	2180350.0		2181572.0	2182072.0	NC_000913.3	2120021.0				2121022.0	IS only present in query Strain.	1. DLIS	Complete IS hit.	b2046	M-antigen undecaprenyl disphosphate flippase	-	Intergenic/Pseudo/Repeaed Region	b2046	M-antigen undecaprenyl disphosphate flippase	b2047	undecaprenyl-phosphate glucose phosphotransferase	4763752.0
1	1					551	sim6	2254240	583	sim6	46	IS30_IS30	2254240	2255460.0	NC_000913.3_art_ISs	2253739.0	2254239.0		2255461.0	2255961.0	NC_000913.3	2192689.0				2193690.0	IS only present in query Strain.	1. DLIS	Complete IS hit.	b2112	DUF2574 domain-containing protein YehE	-	Intergenic/Pseudo/Repeaed Region	b2112	DUF2574 domain-containing protein YehE	b2113	P-loop NTPase family protein	4763752.0
1	1					552	sim6	2258007	584	sim6	47	IS30_IS30	2258007	2259227.0	NC_000913.3_art_ISs	2257506.0	2258006.0		2259228.0	2259728.0	NC_000913.3	2195235.0				2196236.0	IS only present in query Strain.	1. DLIS	Complete IS hit.	-	Intergenic/Pseudo/Repeaed Region	-	Intergenic/Pseudo/Repeaed Region	b2114	methionine--tRNA ligase	b2114	methionine--tRNA ligase	4763752.0
1	1					553	sim6	2324352	585	sim6	48	IS30_IS30	2324352	2325572.0	NC_000913.3_art_ISs	2323851.0	2324351.0		2325573.0	2326073.0	NC_000913.3	2260359.0				2261360.0	IS only present in query Strain.	1. DLIS	Complete IS hit.	-	Intergenic/Pseudo/Repeaed Region	-	Intergenic/Pseudo/Repeaed Region	b2167	fructose-specific PTS multiphosphoryl transfer protein FruA	b2167	fructose-specific PTS multiphosphoryl transfer protein FruA	4763752.0
1	1					554	sim6	2361207	586	sim6	49	IS30_IS30	2361207	2362427.0	NC_000913.3_art_ISs	2360706.0	2361206.0		2362428.0	2362928.0	NC_000913.3	2295993.0				2296994.0	IS only present in query Strain.	1. DLIS	Complete IS hit.	b2199	heme trafficking system membrane protein CcmC	-	Intergenic/Pseudo/Repeaed Region	b2199	heme trafficking system membrane protein CcmC	b2200	heme trafficking system membrane protein CcmB	4763752.0
1	1					555	sim6	2406805	587	sim6	50	IS30_IS30	2406805	2408025.0	NC_000913.3_art_ISs	2406304.0	2406804.0		2408026.0	2408526.0	NC_000913.3	2340370.0				2341371.0	IS only present in query Strain.	1. DLIS	Complete IS hit.	-	Intergenic/Pseudo/Repeaed Region	-	Intergenic/Pseudo/Repeaed Region	-	Intergenic/Pseudo/Repeaed Region	b2233	putative autotransporter adhesin YfaL	4763752.0
1	1					556	sim6	2431774	588	sim6	51	IS30_IS30	2431774	2432994.0	NC_000913.3_art_ISs	2431273.0	2431773.0		2432995.0	2433495.0	NC_000913.3	2364118.0				2365119.0	IS only present in query Strain.	1. DLIS	Complete IS hit.	b2250	putative porin YfaZ	b2252	putative lipopolysaccharide core heptose(II)-phosphate phosphatase	b2250	putative porin YfaZ	b2252	putative lipopolysaccharide core heptose(II)-phosphate phosphatase	4763752.0
1	1					557	sim6	2493155	589	sim6	52	IS30_IS30	2493155	2494375.0	NC_000913.3_art_ISs	2492654.0	2493154.0		2494376.0	2494876.0	NC_000913.3	2424278.0				2425279.0	IS only present in query Strain.	1. DLIS	Complete IS hit.	b2306	lysine/arginine/ornithine ABC transporter/histidine ABC transporter; ATP binding subunit	b2308	lysine/arginine/ornithine ABC transporter/histidine ABC transporter; membrane subunit HisQ	b2306	lysine/arginine/ornithine ABC transporter/histidine ABC transporter; ATP binding subunit	b2308	lysine/arginine/ornithine ABC transporter/histidine ABC transporter; membrane subunit HisQ	4763752.0
1	1					558	sim6	2545195	590	sim6	53	IS30_IS30	2545195	2546415.0	NC_000913.3_art_ISs	2544694.0	2545194.0		2546416.0	2546916.0	NC_000913.3	2475097.0				2476098.0	IS only present in query Strain.	1. DLIS	Complete IS hit.	b2361	CPS-53 (KpLE1) prophage; 5'-deoxynucleotidase	b2363	CPS-53 (KpLE1) prophage; protein YfdT	b2361	CPS-53 (KpLE1) prophage; 5'-deoxynucleotidase	b2363	CPS-53 (KpLE1) prophage; protein YfdT	4763752.0
1	1					559	sim6	2553382	591	sim6	54	IS30_IS30	2553382	2554602.0	NC_000913.3_art_ISs	2552881.0	2553381.0		2554603.0	2555103.0	NC_000913.3	2482063.0				2483064.0	IS only present in query Strain.	1. DLIS	Complete IS hit.	b2367	tripartite efflux pump membrane subunit EmrY	-	Intergenic/Pseudo/Repeaed Region	b2367	tripartite efflux pump membrane subunit EmrY	b2368	tripartite efflux pump membrane fusion protein EmrK	4763752.0
1	1					560	sim6	2560113	592	sim6	55	IS30_IS30	2560113	2561333.0	NC_000913.3_art_ISs	2559612.0	2560112.0		2561334.0	2561834.0	NC_000913.3	2487573.0				2488574.0	IS only present in query Strain.	1. DLIS	Complete IS hit.	b2370	sensory histidine kinase EvgS	-	Intergenic/Pseudo/Repeaed Region	b2370	sensory histidine kinase EvgS	b2371	acetyl-CoA:oxalate CoA-transferase	4763752.0
1	1					561	sim6	2568988	593	sim6	56	IS30_IS30	2568988	2570208.0	NC_000913.3_art_ISs	2568487.0	2568987.0		2570209.0	2570709.0	NC_000913.3	2495227.0				2496228.0	IS only present in query Strain.	1. DLIS	Complete IS hit.	b2377	DUF2545 domain-containing protein YfdY	-	Intergenic/Pseudo/Repeaed Region	b2377	DUF2545 domain-containing protein YfdY	b2378	palmitoleoyl acyltransferase	4763752.0
1	1					562	sim6	2702757	594	sim6	57	IS30_IS30	2702757	2703977.0	NC_000913.3_art_ISs	2702256.0	2702756.0		2703978.0	2704478.0	NC_000913.3	2627775.0				2628776.0	IS only present in query Strain.	1. DLIS	Complete IS hit.	-	Intergenic/Pseudo/Repeaed Region	-	Intergenic/Pseudo/Repeaed Region	b2503	cyclic di-GMP phosphodiesterase PdeF	b2503	cyclic di-GMP phosphodiesterase PdeF	4763752.0
1	1					563	sim6	2705516	595	sim6	58	IS30_IS30	2705516	2706736.0	NC_000913.3_art_ISs	2705015.0	2705515.0		2706737.0	2707237.0	NC_000913.3	2629313.0				2630314.0	IS only present in query Strain.	1. DLIS	Complete IS hit.	b2504	protein YfgG	-	Intergenic/Pseudo/Repeaed Region	b2504	protein YfgG	-	Intergenic/Pseudo/Repeaed Region	4763752.0
1	1					564	sim6	2707588	596	sim6	59	IS30_IS30	2707588	2708808.0	NC_000913.3_art_ISs	2707087.0	2707587.0		2708809.0	2709309.0	NC_000913.3	2630164.0				2631165.0	IS only present in query Strain.	1. DLIS	Complete IS hit.	-	Intergenic/Pseudo/Repeaed Region	b2507	GMP synthetase	b2505	lipoprotein YfgH	b2507	GMP synthetase	4763752.0
1	1					565	sim6	2796669	597	sim6	60	IS30_IS30	2796669	2797889.0	NC_000913.3_art_ISs	2796168.0	2796668.0		2797890.0	2798390.0	NC_000913.3	2718024.0				2719025.0	IS only present in query Strain.	1. DLIS	Complete IS hit.	-	Intergenic/Pseudo/Repeaed Region	b2582	reduced thioredoxin 2	b2581	putative methyltransferase	b2582	reduced thioredoxin 2	4763752.0
1	1					566	sim6	2821392	598	sim6	61	IS30_IS30	2821392	2822612.0	NC_000913.3_art_ISs	2820891.0	2821391.0		2822613.0	2823113.0	NC_000913.3	2741526.0				2742527.0	IS only present in query Strain.	1. DLIS	Complete IS hit.	b2602	DUF2799 domain-containing lipoprotein YfiL	b2604	diguanylate cyclase DgcN	b2602	DUF2799 domain-containing lipoprotein YfiL	b2604	diguanylate cyclase DgcN	4763752.0
1	1					567	sim6	2833023	599	sim6	62	IS30_IS30	2833023	2834243.0	NC_000913.3_art_ISs	2832522.0	2833022.0		2834244.0	2834744.0	NC_000913.3	2751936.0				2752937.0	IS only present in query Strain.	1. DLIS	Complete IS hit.	-	Intergenic/Pseudo/Repeaed Region	-	Intergenic/Pseudo/Repeaed Region	b2616	DNA repair protein RecN	b2616	DNA repair protein RecN	4763752.0
1	1					568	sim6	2865785	600	sim6	63	IS30_IS30	2865785	2867005.0	NC_000913.3_art_ISs	2865284.0	2865784.0		2867006.0	2867506.0	NC_000913.3	2783477.0				2784478.0	IS only present in query Strain.	1. DLIS	Complete IS hit.	-	Intergenic/Pseudo/Repeaed Region	-	Intergenic/Pseudo/Repeaed Region	-	Intergenic/Pseudo/Repeaed Region	-	Intergenic/Pseudo/Repeaed Region	4763752.0
1	1					569	sim6	2922738	601	sim6	64	IS30_IS30	2922738	2923958.0	NC_000913.3_art_ISs	2922237.0	2922737.0		2923959.0	2924459.0	NC_000913.3	2839209.0				2840210.0	IS only present in query Strain.	1. DLIS	Complete IS hit.	b2714	DNA-binding transcriptional repressor AscG	-	Intergenic/Pseudo/Repeaed Region	b2714	DNA-binding transcriptional repressor AscG	b2715	beta-glucoside specific PTS enzyme IIBC component	4763752.0
1	1					570	sim6	2935779	602	sim6	65	IS30_IS30	2935779	2936999.0	NC_000913.3_art_ISs	2935278.0	2935778.0		2937000.0	2937500.0	NC_000913.3	2851029.0				2852030.0	IS only present in query Strain.	1. DLIS	Complete IS hit.	-	Intergenic/Pseudo/Repeaed Region	b2728	hydrogenase 3 maturation protein HypC	b2727	hydrogenase isoenzymes nickel incorporation protein HypB	b2728	hydrogenase 3 maturation protein HypC	4763752.0
1	1					571	sim6	3068981	603	sim6	66	IS30_IS30	3068981	3070201.0	NC_000913.3_art_ISs	3068480.0	3068980.0		3070202.0	3070702.0	NC_000913.3	2983010.0				2984011.0	IS only present in query Strain.	1. DLIS	Complete IS hit.	b2842	putative 2-keto-3-deoxy-D-gluconate dehydrogenase	-	Intergenic/Pseudo/Repeaed Region	b2842	putative 2-keto-3-deoxy-D-gluconate dehydrogenase	b2843	5-dehydro-4-deoxy-D-glucuronate isomerase	4763752.0
1	1					572	sim6	3082947	604	sim6	67	IS30_IS30	3082947	3084167.0	NC_000913.3_art_ISs	3082446.0	3082946.0		3084168.0	3084668.0	NC_000913.3	2995755.0				2996756.0	IS only present in query Strain.	1. DLIS	Complete IS hit.	b2858	putative type III secretion system protein	b2860	IS2 insertion element protein InsB	b2858	putative type III secretion system protein	b2860	IS2 insertion element protein InsB	4763752.0
1	1					573	sim6	3099432	605	sim6	68	IS30_IS30	3099432	3100652.0	NC_000913.3_art_ISs	3098931.0	3099431.0		3100653.0	3101153.0	NC_000913.3	3011019.0				3012020.0	IS only present in query Strain.	1. DLIS	Complete IS hit.	b2873	phenylhydantoinase	-	Intergenic/Pseudo/Repeaed Region	b2873	phenylhydantoinase	b2874	putative amino acid kinase YqeA	4763752.0
1	1					574	sim6	3127471	606	sim6	69	IS30_IS30	3127471	3128691.0	NC_000913.3_art_ISs	3126970.0	3127470.0		3128692.0	3129192.0	NC_000913.3	3037837.0				3038838.0	IS only present in query Strain.	1. DLIS	Complete IS hit.	b2892	ssDNA-specific exonuclease RecJ	-	Intergenic/Pseudo/Repeaed Region	b2892	ssDNA-specific exonuclease RecJ	-	Intergenic/Pseudo/Repeaed Region	4763752.0
1	1					575	sim6	3317471	607	sim6	70	IS30_IS30	3317471	3318691.0	NC_000913.3_art_ISs	3316970.0	3317470.0		3318692.0	3319192.0	NC_000913.3	3226616.0				3227617.0	IS only present in query Strain.	1. DLIS	Complete IS hit.	-	Intergenic/Pseudo/Repeaed Region	-	Intergenic/Pseudo/Repeaed Region	b3078	putative transporter YgjI	b3078	putative transporter YgjI	4763752.0
1	1					576	sim6	3379301	608	sim6	71	IS30_IS30	3379301	3380521.0	NC_000913.3_art_ISs	3378800.0	3379300.0		3380522.0	3381022.0	NC_000913.3	3287225.0				3288226.0	IS only present in query Strain.	1. DLIS	Complete IS hit.	-	Intergenic/Pseudo/Repeaed Region	b3143	putative fimbrial chaperone YraI	-	Intergenic/Pseudo/Repeaed Region	b3143	putative fimbrial chaperone YraI	4763752.0
1	1					577	sim6	3384653	609	sim6	72	IS30_IS30	3384653	3385873.0	NC_000913.3_art_ISs	3384152.0	3384652.0		3385874.0	3386374.0	NC_000913.3	3291356.0				3292357.0	IS only present in query Strain.	1. DLIS	Complete IS hit.	-	Intergenic/Pseudo/Repeaed Region	-	Intergenic/Pseudo/Repeaed Region	b3145	putative fimbrial adhesin YraK	b3145	putative fimbrial adhesin YraK	4763752.0
1	1					578	sim6	3454829	610	sim6	73	IS30_IS30	3454829	3456049.0	NC_000913.3_art_ISs	3454328.0	3454828.0		3456050.0	3456550.0	NC_000913.3	3360311.0				3361312.0	IS only present in query Strain.	1. DLIS	Complete IS hit.	b3213	glutamate synthase subunit GltD	b3214	periplasmic protein GltF	b3213	glutamate synthase subunit GltD	b3214	periplasmic protein GltF	4763752.0
1	1					579	sim6	3519228	611	sim6	74	IS30_IS30	3519228	3520448.0	NC_000913.3_art_ISs	3518727.0	3519227.0		3520449.0	3520949.0	NC_000913.3	3423489.0				3424490.0	IS only present in query Strain.	1. DLIS	Complete IS hit.	-	Intergenic/Pseudo/Repeaed Region	-	Intergenic/Pseudo/Repeaed Region	-	Intergenic/Pseudo/Repeaed Region	-	Intergenic/Pseudo/Repeaed Region	4763752.0
1	1					580	sim6	3593911	612	sim6	75	IS30_IS30	3593911	3595131.0	NC_000913.3_art_ISs	3593410.0	3593910.0		3595132.0	3595632.0	NC_000913.3	3496951.0				3497952.0	IS only present in query Strain.	1. DLIS	Complete IS hit.	-	Intergenic/Pseudo/Repeaed Region	b3368	siroheme synthase	-	Intergenic/Pseudo/Repeaed Region	b3368	siroheme synthase	4763752.0
1	1					581	sim6	3740928	613	sim6	76	IS30_IS30	3740928	3742148.0	NC_000913.3_art_ISs	3740427.0	3740927.0		3742149.0	3742649.0	NC_000913.3	3642747.0				3643748.0	IS only present in query Strain.	1. DLIS	Complete IS hit.	b3497	16S rRNA m(2)G1516 methyltransferase	-	Intergenic/Pseudo/Repeaed Region	b3497	16S rRNA m(2)G1516 methyltransferase	b3498	oligopeptidase A	4763752.0
1	1					582	sim6	3777008	614	sim6	77	IS30_IS30	3777008	3778228.0	NC_000913.3_art_ISs	3776507.0	3777007.0		3778229.0	3778729.0	NC_000913.3	3677606.0				3678607.0	IS only present in query Strain.	1. DLIS	Complete IS hit.	-	Intergenic/Pseudo/Repeaed Region	b3525	c-di-GMP phosphodiesterase PdeH	b3524	AsmA family protein YhjG	b3525	c-di-GMP phosphodiesterase PdeH	4763752.0
1	1					583	sim6	3822008	615	sim6	78	IS30_IS30	3822008	3823228.0	NC_000913.3_art_ISs	3821507.0	3822007.0		3823229.0	3823729.0	NC_000913.3	3721385.0				3722386.0	IS only present in query Strain.	1. DLIS	Complete IS hit.	-	Intergenic/Pseudo/Repeaed Region	b3559	glycine--tRNA ligase subunit beta	b3558	IS150 conserved protein InsB	b3559	glycine--tRNA ligase subunit beta	4763752.0
1	1					584	sim6	3856716	616	sim6	79	IS30_IS30	3856716	3857936.0	NC_000913.3_art_ISs	3856215.0	3856715.0		3857937.0	3858437.0	NC_000913.3	3754872.0				3755873.0	IS only present in query Strain.	1. DLIS	Complete IS hit.	-	Intergenic/Pseudo/Repeaed Region	-	Intergenic/Pseudo/Repeaed Region	-	Intergenic/Pseudo/Repeaed Region	b3588	aldehyde dehydrogenase B	4763752.0
1	1					585	sim6	3881001	617	sim6	80	IS30_IS30	3881001	3882221.0	NC_000913.3_art_ISs	3880500.0	3881000.0		3882222.0	3882722.0	NC_000913.3	3777936.0				3778937.0	IS only present in query Strain.	1. DLIS	Complete IS hit.	-	Intergenic/Pseudo/Repeaed Region	-	Intergenic/Pseudo/Repeaed Region	b3603	lactate/glycolate:H(+) symporter LldP	b3603	lactate/glycolate:H(+) symporter LldP	4763752.0
1	1					586	sim6	3912492	618	sim6	81	IS30_IS30	3912492	3913712.0	NC_000913.3_art_ISs	3911991.0	3912491.0		3913713.0	3914213.0	NC_000913.3	3808206.0				3809207.0	IS only present in query Strain.	1. DLIS	Complete IS hit.	-	Intergenic/Pseudo/Repeaed Region	-	Intergenic/Pseudo/Repeaed Region	-	Intergenic/Pseudo/Repeaed Region	b3633	KDO transferase	4763752.0
1	1					587	sim6	3958374	619	sim6	82	IS30_IS30	3958374	3959594.0	NC_000913.3_art_ISs	3957873.0	3958373.0		3959595.0	3960095.0	NC_000913.3	3852867.0				3853868.0	IS only present in query Strain.	1. DLIS	Complete IS hit.	-	Intergenic/Pseudo/Repeaed Region	-	Intergenic/Pseudo/Repeaed Region	-	Intergenic/Pseudo/Repeaed Region	-	Intergenic/Pseudo/Repeaed Region	4763752.0
1	1					588	sim6	4048712	620	sim6	83	IS30_IS30	4048712	4049932.0	NC_000913.3_art_ISs	4048211.0	4048711.0		4049933.0	4050433.0	NC_000913.3	3941984.0				3942985.0	IS only present in query Strain.	1. DLIS	Complete IS hit.	-	Intergenic/Pseudo/Repeaed Region	-	Intergenic/Pseudo/Repeaed Region	-	Intergenic/Pseudo/Repeaed Region	-	Intergenic/Pseudo/Repeaed Region	4763752.0
1	1					589	sim6	4052723	621	sim6	84	IS30_IS30	4052723	4053943.0	NC_000913.3_art_ISs	4052222.0	4052722.0		4053944.0	4054444.0	NC_000913.3	226829.0				227830.0	IS only present in query Strain.	1. DLIS	Complete IS hit.	-	Intergenic/Pseudo/Repeaed Region	-	Intergenic/Pseudo/Repeaed Region	-	Intergenic/Pseudo/Repeaed Region	-	Intergenic/Pseudo/Repeaed Region	4763752.0
1	1					590	sim6	4058719	622	sim6	85	IS30_IS30	4058719	4059939.0	NC_000913.3_art_ISs	4058218.0	4058718.0		4059940.0	4060440.0	NC_000913.3	3949549.0				3950550.0	IS only present in query Strain.	1. DLIS	Complete IS hit.	b3765	putative magnesium chelatase YifB	b4669	uncharacterized protein IlvX	b3765	putative magnesium chelatase YifB	b4669	uncharacterized protein IlvX	4763752.0
1	1					591	sim6	4070676	623	sim6	86	IS30_IS30	4070676	4071896.0	NC_000913.3_art_ISs	4070175.0	4070675.0		4071897.0	4072397.0	NC_000913.3	3960285.0				3961286.0	IS only present in query Strain.	1. DLIS	Complete IS hit.	b3777	putative toxin YifN	-	Intergenic/Pseudo/Repeaed Region	b3777	putative toxin YifN	b3778	ATP-dependent DNA helicase Rep	4763752.0
1	1					592	sim6	4075609	624	sim6	87	IS30_IS30	4075609	4076829.0	NC_000913.3_art_ISs	4075108.0	4075608.0		4076830.0	4077330.0	NC_000913.3	3963997.0				3964998.0	IS only present in query Strain.	1. DLIS	Complete IS hit.	b3779	guanosine-5'-triphosphate;3'-diphosphate phosphatase	-	Intergenic/Pseudo/Repeaed Region	b3779	guanosine-5'-triphosphate;3'-diphosphate phosphatase	b3780	ATP-dependent RNA helicase RhlB	4763752.0
1	1					593	sim6	4255672	625	sim6	88	IS30_IS30	4255672	4256892.0	NC_000913.3_art_ISs	4255171.0	4255671.0		4256893.0	4257393.0	NC_000913.3	4142839.0				4143840.0	IS only present in query Strain.	1. DLIS	Complete IS hit.	-	Intergenic/Pseudo/Repeaed Region	b3950	putative PTS enzyme IIB component FrwB	b3949	putative PTS enzyme IIC component FrwC	b3950	putative PTS enzyme IIB component FrwB	4763752.0
1	1					594	sim6	4310350	626	sim6	89	IS30_IS30	4310350	4311570.0	NC_000913.3_art_ISs	4309849.0	4310349.0		4311571.0	4312071.0	NC_000913.3	4196296.0				4197297.0	IS only present in query Strain.	1. DLIS	Complete IS hit.	-	Intergenic/Pseudo/Repeaed Region	b3996	NADH pyrophosphatase	-	Intergenic/Pseudo/Repeaed Region	b3996	NADH pyrophosphatase	4763752.0
1	1					595	sim6	4315127	627	sim6	90	IS30_IS30	4315127	4316347.0	NC_000913.3_art_ISs	4314626.0	4315126.0		4316348.0	4316848.0	NC_000913.3	4199852.0				4200853.0	IS only present in query Strain.	1. DLIS	Complete IS hit.	b3999	conserved protein YjaG	b4001	DUF1481 domain-containing protein YjaH	b3999	conserved protein YjaG	b4001	DUF1481 domain-containing protein YjaH	4763752.0
1	1					598	sim6	4567092	628	sim6	91	IS30_IS30	4567092	4568312.0	NC_000913.3_art_ISs	4566591.0	4567091.0		4568313.0	4568813.0	NC_000913.3	4448154.0				4449155.0	IS only present in query Strain.	1. DLIS	Complete IS hit.	b4222	gamma-glutamylamine cyclotransferase family protein YtfP	b4226	inorganic pyrophosphatase	b4222	gamma-glutamylamine cyclotransferase family protein YtfP	b4226	inorganic pyrophosphatase	4763752.0
1	1					599	sim6	4569791	629	sim6	92	IS30_IS30	4569791	4571011.0	NC_000913.3_art_ISs	4569290.0	4569790.0		4571012.0	4571512.0	NC_000913.3	4449632.0				4450633.0	IS only present in query Strain.	1. DLIS	Complete IS hit.	b4226	inorganic pyrophosphatase	-	Intergenic/Pseudo/Repeaed Region	b4226	inorganic pyrophosphatase	b4227	galactofuranose ABC transporter periplasmic binding protein	4763752.0
1	1					600	sim6	4578648	630	sim6	93	IS30_IS30	4578648	4579868.0	NC_000913.3_art_ISs	4578147.0	4578647.0		4579869.0	4580369.0	NC_000913.3	4457268.0				4458269.0	IS only present in query Strain.	1. DLIS	Complete IS hit.	-	Intergenic/Pseudo/Repeaed Region	b4235	metalloprotease PmbA	-	Intergenic/Pseudo/Repeaed Region	b4235	metalloprotease PmbA	4763752.0
1	1					601	sim7	33946	649	sim7	0	IS30_IS30	33946	35166.0	NC_000913.3_art_ISs	33445.0	33945.0		35167.0	35667.0	NC_000913.3	33445.0				34446.0	IS only present in query Strain.	1. DLIS	Complete IS hit.	-	Intergenic/Pseudo/Repeaed Region	b0034	DNA-binding transcriptional activator CaiF	b0033	carbamoyl phosphate synthetase subunit beta	b0034	DNA-binding transcriptional activator CaiF	4763752.0
1	1					602	sim7	71895	650	sim7	1	IS30_IS30	71895	73115.0	NC_000913.3_art_ISs	71394.0	71894.0		73116.0	73616.0	NC_000913.3	70173.0				71174.0	IS only present in query Strain.	1. DLIS	Complete IS hit.	-	Intergenic/Pseudo/Repeaed Region	-	Intergenic/Pseudo/Repeaed Region	-	Intergenic/Pseudo/Repeaed Region	b0064	DNA-binding transcriptional dual regulator AraC	4763752.0
1	1					603	sim7	98241	651	sim7	2	IS30_IS30	98241	99461.0	NC_000913.3_art_ISs	97740.0	98240.0		99462.0	99962.0	NC_000913.3	95298.0				96299.0	IS only present in query Strain.	1. DLIS	Complete IS hit.	-	Intergenic/Pseudo/Repeaed Region	b0087	phospho-N-acetylmuramoyl-pentapeptide- transferase	b0086	D-alanyl-D-alanine-adding enzyme	b0087	phospho-N-acetylmuramoyl-pentapeptide- transferase	4763752.0
1	1					604	sim7	121127	652	sim7	3	IS30_IS30	121127	122347.0	NC_000913.3_art_ISs	120626.0	121126.0		122348.0	122848.0	NC_000913.3	116963.0				117964.0	IS only present in query Strain.	1. DLIS	Complete IS hit.	b0107	T2SSE family protein	b0109	quinolinate phosphoribosyltransferase (decarboxylating)	b0107	T2SSE family protein	b0109	quinolinate phosphoribosyltransferase (decarboxylating)	4763752.0
1	1					605	sim7	246891	653	sim7	4	IS30_IS30	246891	248111.0	NC_000913.3_art_ISs	246390.0	246890.0		248112.0	248612.0	NC_000913.3	241506.0				242507.0	IS only present in query Strain.	1. DLIS	Complete IS hit.	-	Intergenic/Pseudo/Repeaed Region	-	Intergenic/Pseudo/Repeaed Region	b0221	acyl-CoA dehydrogenase	b0221	acyl-CoA dehydrogenase	4763752.0
1	1					606	sim7	283695	654	sim7	5	IS30_IS30	283695	284915.0	NC_000913.3_art_ISs	283194.0	283694.0		284916.0	285416.0	NC_000913.3	277089.0				278090.0	IS only present in query Strain.	1. DLIS	Complete IS hit.	-	Intergenic/Pseudo/Repeaed Region	b0262	CP4-6 prophage; ABC transporter ATP-binding protein AfuC	b0261	homocysteine S-methyltransferase	b0262	CP4-6 prophage; ABC transporter ATP-binding protein AfuC	4763752.0
1	1					608	sim7	293593	655	sim7	6	IS30_IS30	293593	294813.0	NC_000913.3_art_ISs	293092.0	293592.0		294814.0	295314.0	NC_000913.3	284545.0				285546.0	IS only present in query Strain.	1. DLIS	Complete IS hit.	-	Intergenic/Pseudo/Repeaed Region	b0270	putative D-xylonate transporter YagG	b0269	CP4-6 prophage; D-xylonate dehydratase	b0270	putative D-xylonate transporter YagG	4763752.0
1	1					609	sim7	300920	656	sim7	7	IS30_IS30	300920	302140.0	NC_000913.3_art_ISs	300419.0	300919.0		302141.0	302641.0	NC_000913.3	290651.0				291652.0	IS only present in query Strain.	1. DLIS	Complete IS hit.	-	Intergenic/Pseudo/Repeaed Region	b0276	CP4-6 prophage; protein YagJ	b0274	IS1 protein InsB	b0276	CP4-6 prophage; protein YagJ	4763752.0
1	1					610	sim7	361350	657	sim7	8	IS30_IS30	361350	362570.0	NC_000913.3_art_ISs	360849.0	361349.0		362571.0	363071.0	NC_000913.3	349860.0				350861.0	IS only present in query Strain.	1. DLIS	Complete IS hit.	-	Intergenic/Pseudo/Repeaed Region	-	Intergenic/Pseudo/Repeaed Region	-	Intergenic/Pseudo/Repeaed Region	b0333	2-methylcitrate synthase	4763752.0
1	1					611	sim7	484929	658	sim7	9	IS30_IS30	484929	486149.0	NC_000913.3_art_ISs	484428.0	484928.0		486150.0	486650.0	NC_000913.3	472218.0				473219.0	IS only present in query Strain.	1. DLIS	Complete IS hit.	b0449	ABC transporter family protein MdlB	b0451	ammonia/ammonium transporter	b0449	ABC transporter family protein MdlB	b0451	ammonia/ammonium transporter	4763752.0
1	1					612	sim7	571247	659	sim7	10	IS30_IS30	571247	572467.0	NC_000913.3_art_ISs	570746.0	571246.0		572468.0	572968.0	NC_000913.3	557315.0				558316.0	IS only present in query Strain.	1. DLIS	Complete IS hit.	b0529	bifunctional 5;10-methylene-tetrahydrofolate dehydrogenase/ 5;10-methylene-tetrahydrofolate cyclohydrolase	b0530	putative fimbrial protein SfmA	b0529	bifunctional 5;10-methylene-tetrahydrofolate dehydrogenase/ 5;10-methylene-tetrahydrofolate cyclohydrolase	b0530	putative fimbrial protein SfmA	4763752.0
1	1					613	sim7	626015	660	sim7	11	IS30_IS30	626015	627235.0	NC_000913.3_art_ISs	625514.0	626014.0		627236.0	627736.0	NC_000913.3	610862.0				611863.0	IS only present in query Strain.	1. DLIS	Complete IS hit.	-	Intergenic/Pseudo/Repeaed Region	-	Intergenic/Pseudo/Repeaed Region	b0584	ferric enterobactin outer membrane transporter	b0584	ferric enterobactin outer membrane transporter	4763752.0
1	1					614	sim7	655196	661	sim7	12	IS30_IS30	655196	656416.0	NC_000913.3_art_ISs	654695.0	655195.0		656417.0	656917.0	NC_000913.3	638822.0				639823.0	IS only present in query Strain.	1. DLIS	Complete IS hit.	-	Intergenic/Pseudo/Repeaed Region	b0606	alkyl hydroperoxide reductase; AhpF component	-	Intergenic/Pseudo/Repeaed Region	b0606	alkyl hydroperoxide reductase; AhpF component	4763752.0
1	1					615	sim7	723148	662	sim7	13	IS30_IS30	723148	724368.0	NC_000913.3_art_ISs	722647.0	723147.0		724369.0	724869.0	NC_000913.3	705553.0				706554.0	IS only present in query Strain.	1. DLIS	Complete IS hit.	b0679	N-acetylglucosamine specific PTS enzyme IIABC component	b0680	glutamine--tRNA ligase	b0679	N-acetylglucosamine specific PTS enzyme IIABC component	b0680	glutamine--tRNA ligase	4763752.0
1	1					616	sim7	752879	663	sim7	14	IS30_IS30	752879	754099.0	NC_000913.3_art_ISs	752378.0	752878.0		754100.0	754600.0	NC_000913.3	732277.0				733193.0	IS only present in query Strain.	1. DLIS	Complete IS hit.	b0702	uncharacterized protein YbfB	-	Intergenic/Pseudo/Repeaed Region	b0700	rhs element protein RhsC	b0700	rhs element protein RhsC	4763752.0
1	1					617	sim7	774996	664	sim7	15	IS30_IS30	774996	776216.0	NC_000913.3_art_ISs	774495.0	774995.0		776217.0	776717.0	NC_000913.3	754959.0				755960.0	IS only present in query Strain.	1. DLIS	Complete IS hit.	-	Intergenic/Pseudo/Repeaed Region	b0723	succinate:quinone oxidoreductase; FAD binding protein	-	Intergenic/Pseudo/Repeaed Region	b0723	succinate:quinone oxidoreductase; FAD binding protein	4763752.0
1	1					618	sim7	794730	665	sim7	16	IS30_IS30	794730	795950.0	NC_000913.3_art_ISs	794229.0	794729.0		795951.0	796451.0	NC_000913.3	773472.0				774473.0	IS only present in query Strain.	1. DLIS	Complete IS hit.	-	Intergenic/Pseudo/Repeaed Region	b0735	cyd operon protein YbgE	b0734	cytochrome bd-I ubiquinol oxidase subunit II	b0735	cyd operon protein YbgE	4763752.0
1	1					619	sim7	861815	666	sim7	17	IS30_IS30	861815	863035.0	NC_000913.3_art_ISs	861314.0	861814.0		863036.0	863536.0	NC_000913.3	839336.0				840337.0	IS only present in query Strain.	1. DLIS	Complete IS hit.	-	Intergenic/Pseudo/Repeaed Region	-	Intergenic/Pseudo/Repeaed Region	b0805	putative iron siderophore outer membrane transporter	b0805	putative iron siderophore outer membrane transporter	4763752.0
1	1					622	sim7	918680	667	sim7	18	IS30_IS30	918680	919900.0	NC_000913.3_art_ISs	918179.0	918679.0		919901.0	920401.0	NC_000913.3	892538.0				893539.0	IS only present in query Strain.	1. DLIS	Complete IS hit.	b0852	ribosomal protein S6 modification protein	-	Intergenic/Pseudo/Repeaed Region	b0852	ribosomal protein S6 modification protein	-	Intergenic/Pseudo/Repeaed Region	4763752.0
1	1					623	sim7	1023489	668	sim7	19	IS30_IS30	1023489	1024709.0	NC_000913.3_art_ISs	1022988.0	1023488.0		1024710.0	1025210.0	NC_000913.3	996126.0				997127.0	IS only present in query Strain.	1. DLIS	Complete IS hit.	-	Intergenic/Pseudo/Repeaed Region	b0937	NADPH-dependent FMN reductase	b0936	aliphatic sulfonate ABC transporter periplasmic binding protein	b0937	NADPH-dependent FMN reductase	4763752.0
1	1					624	sim7	1029347	669	sim7	20	IS30_IS30	1029347	1030567.0	NC_000913.3_art_ISs	1028846.0	1029346.0		1030568.0	1031068.0	NC_000913.3	1000763.0				1001764.0	IS only present in query Strain.	1. DLIS	Complete IS hit.	-	Intergenic/Pseudo/Repeaed Region	-	Intergenic/Pseudo/Repeaed Region	b0940	putative fimbrial usher protein ElfC	b0940	putative fimbrial usher protein ElfC	4763752.0
1	1					625	sim7	1033724	670	sim7	21	IS30_IS30	1033724	1034944.0	NC_000913.3_art_ISs	1033223.0	1033723.0		1034945.0	1035445.0	NC_000913.3	1003919.0				1004920.0	IS only present in query Strain.	1. DLIS	Complete IS hit.	b0943	putative fimbrial protein YcbV	b0945	dihydroorotate dehydrogenase; type 2	b0943	putative fimbrial protein YcbV	b0945	dihydroorotate dehydrogenase; type 2	4763752.0
1	1					626	sim7	1063106	671	sim7	22	IS30_IS30	1063106	1064326.0	NC_000913.3_art_ISs	1062605.0	1063105.0		1064327.0	1064827.0	NC_000913.3	1032080.0				1033081.0	IS only present in query Strain.	1. DLIS	Complete IS hit.	-	Intergenic/Pseudo/Repeaed Region	-	Intergenic/Pseudo/Repeaed Region	-	Intergenic/Pseudo/Repeaed Region	b0972	hydrogenase 1 small subunit	4763752.0
1	1					627	sim7	1109521	672	sim7	23	IS30_IS30	1109521	1110741.0	NC_000913.3_art_ISs	1109020.0	1109520.0		1110742.0	1111242.0	NC_000913.3	1077274.0				1078275.0	IS only present in query Strain.	1. DLIS	Complete IS hit.	-	Intergenic/Pseudo/Repeaed Region	-	Intergenic/Pseudo/Repeaed Region	b1014	fused DNA-binding transcriptional repressor/proline dehydrogenase/1-pyrroline-5-carboxylate dehydrogenase PutA	b1014	fused DNA-binding transcriptional repressor/proline dehydrogenase/1-pyrroline-5-carboxylate dehydrogenase PutA	4763752.0
1	1					628	sim7	1114232	673	sim7	24	IS30_IS30	1114232	1115452.0	NC_000913.3_art_ISs	1113731.0	1114231.0		1115453.0	1115953.0	NC_000913.3	1080764.0				1081765.0	IS only present in query Strain.	1. DLIS	Complete IS hit.	b1015	proline:Na(+) symporter	b4490	inactive ferrous iron permease EfeU; N-terminal fragment	b1015	proline:Na(+) symporter	b4490	inactive ferrous iron permease EfeU; N-terminal fragment	4763752.0
1	1					629	sim7	1119208	674	sim7	25	IS30_IS30	1119208	1120428.0	NC_000913.3_art_ISs	1118707.0	1119207.0		1120429.0	1120929.0	NC_000913.3	1084519.0				1085520.0	IS only present in query Strain.	1. DLIS	Complete IS hit.	b1019	heme-containing peroxidase/deferrochelatase	-	Intergenic/Pseudo/Repeaed Region	b1019	heme-containing peroxidase/deferrochelatase	b1020	ATP-binding protein PhoH	4763752.0
1	1					630	sim7	1142331	675	sim7	26	IS30_IS30	1142331	1143551.0	NC_000913.3_art_ISs	1141830.0	1142330.0		1143552.0	1144052.0	NC_000913.3	1106421.0				1107422.0	IS only present in query Strain.	1. DLIS	Complete IS hit.	-	Intergenic/Pseudo/Repeaed Region	-	Intergenic/Pseudo/Repeaed Region	b1046	cardiolipin synthase C	b1046	cardiolipin synthase C	4763752.0
1	1					631	sim7	1160231	676	sim7	27	IS30_IS30	1160231	1161451.0	NC_000913.3_art_ISs	1159730.0	1160230.0		1161452.0	1161952.0	NC_000913.3	1123100.0				1124101.0	IS only present in query Strain.	1. DLIS	Complete IS hit.	b1063	putative lipid-binding lipoprotein YceB	-	Intergenic/Pseudo/Repeaed Region	b1063	putative lipid-binding lipoprotein YceB	-	Intergenic/Pseudo/Repeaed Region	4763752.0
1	1					632	sim7	1288442	677	sim7	28	IS30_IS30	1288442	1289662.0	NC_000913.3_art_ISs	1287941.0	1288441.0		1289663.0	1290163.0	NC_000913.3	1250090.0				1251091.0	IS only present in query Strain.	1. DLIS	Complete IS hit.	-	Intergenic/Pseudo/Repeaed Region	b1201	DNA-binding transcriptional dual regulator DhaR	b1200	dihydroxyacetone kinase subunit K	b1201	DNA-binding transcriptional dual regulator DhaR	4763752.0
1	1					633	sim7	1448964	678	sim7	29	IS30_IS30	1448964	1450184.0	NC_000913.3_art_ISs	1448463.0	1448963.0		1450185.0	1450685.0	NC_000913.3	1409391.0				1410392.0	IS only present in query Strain.	1. DLIS	Complete IS hit.	b4743	protein YnaL	-	Intergenic/Pseudo/Repeaed Region	b4743	protein YnaL	b1343	ATP-dependent RNA helicase DbpA	4763752.0
1	1					634	sim7	1474096	679	sim7	30	IS30_IS30	1474096	1475316.0	NC_000913.3_art_ISs	1473595.0	1474095.0		1475317.0	1475817.0	NC_000913.3	1433302.0				1434303.0	IS only present in query Strain.	1. DLIS	Complete IS hit.	b1374	Rac prophage; putative site-specific recombinase	b4744	Rac prophage; protein YnaM	b1374	Rac prophage; putative site-specific recombinase	b4744	Rac prophage; protein YnaM	4763752.0
1	1					635	sim7	1565651	680	sim7	31	IS30_IS30	1565651	1566871.0	NC_000913.3_art_ISs	1565150.0	1565650.0		1566872.0	1567372.0	NC_000913.3	1523636.0				1524637.0	IS only present in query Strain.	1. DLIS	Complete IS hit.	-	Intergenic/Pseudo/Repeaed Region	b1453	L-asparagine transporter	b1452	PQQ-like domain-containing protein YncE	b1453	L-asparagine transporter	4763752.0
1	1					636	sim7	1599246	681	sim7	32	IS30_IS30	1599246	1600466.0	NC_000913.3_art_ISs	1598745.0	1599245.0		1600467.0	1600967.0	NC_000913.3	1556010.0				1557011.0	IS only present in query Strain.	1. DLIS	Complete IS hit.	-	Intergenic/Pseudo/Repeaed Region	b1482	osmotically inducible peroxiredoxin	-	Intergenic/Pseudo/Repeaed Region	b1482	osmotically inducible peroxiredoxin	4763752.0
1	1					637	sim7	1729614	682	sim7	33	IS30_IS30	1729614	1730834.0	NC_000913.3_art_ISs	1729113.0	1729613.0		1730835.0	1731335.0	NC_000913.3	1685157.0				1686158.0	IS only present in query Strain.	1. DLIS	Complete IS hit.	b1610	DNA replication terminus site-binding protein	-	Intergenic/Pseudo/Repeaed Region	b1610	DNA replication terminus site-binding protein	b1611	fumarase C	4763752.0
1	1					638	sim7	1789616	683	sim7	34	IS30_IS30	1789616	1790836.0	NC_000913.3_art_ISs	1789115.0	1789615.0		1790837.0	1791337.0	NC_000913.3	1743938.0				1744939.0	IS only present in query Strain.	1. DLIS	Complete IS hit.	-	Intergenic/Pseudo/Repeaed Region	b1664	adhesin-like autotransporter YdhQ	b1663	multidrug efflux pump MdtK	b1664	adhesin-like autotransporter YdhQ	4763752.0
1	1					639	sim7	1839455	684	sim7	35	IS30_IS30	1839455	1840675.0	NC_000913.3_art_ISs	1838954.0	1839454.0		1840676.0	1841176.0	NC_000913.3	1792556.0				1793557.0	IS only present in query Strain.	1. DLIS	Complete IS hit.	b1708	NlpC/P60 family lipoprotein NlpC	b1710	thioredoxin/glutathione peroxidase	b1708	NlpC/P60 family lipoprotein NlpC	b1709	vitamin B12 ABC transporter ATP binding subunit	4763752.0
1	1					640	sim7	1874348	685	sim7	36	IS30_IS30	1874348	1875568.0	NC_000913.3_art_ISs	1873847.0	1874347.0		1875569.0	1876069.0	NC_000913.3	1826228.0				1827229.0	IS only present in query Strain.	1. DLIS	Complete IS hit.	-	Intergenic/Pseudo/Repeaed Region	b1745	N-succinylarginine dihydrolase	b1744	succinylglutamate desuccinylase	b1745	N-succinylarginine dihydrolase	4763752.0
1	1					641	sim7	1916540	686	sim7	37	IS30_IS30	1916540	1917760.0	NC_000913.3_art_ISs	1916039.0	1916539.0		1917761.0	1918261.0	NC_000913.3	1867199.0				1868200.0	IS only present in query Strain.	1. DLIS	Complete IS hit.	-	Intergenic/Pseudo/Repeaed Region	-	Intergenic/Pseudo/Repeaed Region	b1783	protein kinase YeaG	b1783	protein kinase YeaG	4763752.0
1	1					642	sim7	1938729	687	sim7	38	IS30_IS30	1938729	1939949.0	NC_000913.3_art_ISs	1938228.0	1938728.0		1939950.0	1940450.0	NC_000913.3	1888167.0				1889168.0	IS only present in query Strain.	1. DLIS	Complete IS hit.	-	Intergenic/Pseudo/Repeaed Region	-	Intergenic/Pseudo/Repeaed Region	b1805	fatty acyl-CoA synthetase	b1805	fatty acyl-CoA synthetase	4763752.0
1	1					643	sim7	1972152	688	sim7	39	IS30_IS30	1972152	1973372.0	NC_000913.3_art_ISs	1971651.0	1972151.0		1973373.0	1973873.0	NC_000913.3	1920369.0				1921370.0	IS only present in query Strain.	1. DLIS	Complete IS hit.	-	Intergenic/Pseudo/Repeaed Region	-	Intergenic/Pseudo/Repeaed Region	b1835	16S rRNA m(5)C1407 methyltransferase	b1835	16S rRNA m(5)C1407 methyltransferase	4763752.0
1	1					644	sim7	1983153	689	sim7	40	IS30_IS30	1983153	1984373.0	NC_000913.3_art_ISs	1982652.0	1983152.0		1984374.0	1984874.0	NC_000913.3	1930149.0				1931150.0	IS only present in query Strain.	1. DLIS	Complete IS hit.	b1847	secreted protein YebF	b1849	phosphoribosylglycinamide formyltransferase 2	b1847	secreted protein YebF	b1849	phosphoribosylglycinamide formyltransferase 2	4763752.0
1	1					645	sim7	2029386	690	sim7	41	IS30_IS30	2029386	2030606.0	NC_000913.3_art_ISs	2028885.0	2029385.0		2030607.0	2031107.0	NC_000913.3	1975161.0				1976162.0	IS only present in query Strain.	1. DLIS	Complete IS hit.	b1888	chemotaxis protein CheA	-	Intergenic/Pseudo/Repeaed Region	b1888	chemotaxis protein CheA	b1889	motility protein B	4763752.0
1	1					646	sim7	2088760	691	sim7	42	IS30_IS30	2088760	2089980.0	NC_000913.3_art_ISs	2088259.0	2088759.0		2089981.0	2090481.0	NC_000913.3	2033314.0				2034315.0	IS only present in query Strain.	1. DLIS	Complete IS hit.	b1963	putative inner membrane protein	b4496	putative outer membrane protein YedS; N-terminal fragment	b1963	putative inner membrane protein	b4496	putative outer membrane protein YedS; N-terminal fragment	4763752.0
1	1					647	sim7	2160659	692	sim7	43	IS30_IS30	2160659	2161879.0	NC_000913.3_art_ISs	2160158.0	2160658.0		2161880.0	2162380.0	NC_000913.3	2103992.0				2104993.0	IS only present in query Strain.	1. DLIS	Complete IS hit.	-	Intergenic/Pseudo/Repeaed Region	b2033	putative acyl transferase	b2032	putative lipopolysaccharide biosynthesis protein	b2033	putative acyl transferase	4763752.0
1	1					648	sim7	2228986	693	sim7	44	IS30_IS30	2228986	2230206.0	NC_000913.3_art_ISs	2228485.0	2228985.0		2230207.0	2230707.0	NC_000913.3	2171098.0				2172099.0	IS only present in query Strain.	1. DLIS	Complete IS hit.	b2089	IS3 element protein InsF	b2091	galactitol-1-phosphate 5-dehydrogenase	b2089	IS3 element protein InsF	b2091	galactitol-1-phosphate 5-dehydrogenase	4763752.0
1	1					649	sim7	2293595	694	sim7	45	IS30_IS30	2293595	2294815.0	NC_000913.3_art_ISs	2293094.0	2293594.0		2294816.0	2295316.0	NC_000913.3	2234486.0				2235487.0	IS only present in query Strain.	1. DLIS	Complete IS hit.	-	Intergenic/Pseudo/Repeaed Region	b2147	NAD-dependent dihydropyrimidine dehydrogenase subunit PreA	b2146	NAD-dependent dihydropyrimidine dehydrogenase subunit PreT	b2147	NAD-dependent dihydropyrimidine dehydrogenase subunit PreA	4763752.0
1	1					650	sim7	2301753	695	sim7	46	IS30_IS30	2301753	2302973.0	NC_000913.3_art_ISs	2301252.0	2301752.0		2302974.0	2303474.0	NC_000913.3	2241423.0				2242424.0	IS only present in query Strain.	1. DLIS	Complete IS hit.	b2151	DNA-binding transcriptional dual regulator GalS	-	Intergenic/Pseudo/Repeaed Region	b2151	DNA-binding transcriptional dual regulator GalS	b2152	DUF418 domain-containing protein YeiB	4763752.0
1	1					651	sim7	2376996	696	sim7	47	IS30_IS30	2376996	2378216.0	NC_000913.3_art_ISs	2376495.0	2376995.0		2378217.0	2378717.0	NC_000913.3	2315445.0				2316446.0	IS only present in query Strain.	1. DLIS	Complete IS hit.	-	Intergenic/Pseudo/Repeaed Region	b2217	DNA-binding transcriptional activator RcsB	b2216	RcsD phosphotransferase	b2217	DNA-binding transcriptional activator RcsB	4763752.0
1	1					652	sim7	2457745	697	sim7	48	IS30_IS30	2457745	2458965.0	NC_000913.3_art_ISs	2457244.0	2457744.0		2458966.0	2459466.0	NC_000913.3	2394973.0				2395974.0	IS only present in query Strain.	1. DLIS	Complete IS hit.	b2278	NADH:quinone oxidoreductase subunit L	b2281	NADH:quinone oxidoreductase subunit I	b2278	NADH:quinone oxidoreductase subunit L	b2281	NADH:quinone oxidoreductase subunit I	4763752.0
1	1					653	sim7	2460147	698	sim7	49	IS30_IS30	2460147	2461367.0	NC_000913.3_art_ISs	2459646.0	2460146.0		2461368.0	2461868.0	NC_000913.3	2396154.0				2397155.0	IS only present in query Strain.	1. DLIS	Complete IS hit.	b2281	NADH:quinone oxidoreductase subunit I	-	Intergenic/Pseudo/Repeaed Region	b2281	NADH:quinone oxidoreductase subunit I	b2282	NADH:quinone oxidoreductase subunit H	4763752.0
1	1					656	sim7	2716211	699	sim7	50	IS30_IS30	2716211	2717431.0	NC_000913.3_art_ISs	2715710.0	2716210.0		2717432.0	2717932.0	NC_000913.3	2648555.0				2649556.0	IS only present in query Strain.	1. DLIS	Complete IS hit.	-	Intergenic/Pseudo/Repeaed Region	-	Intergenic/Pseudo/Repeaed Region	b2520	alpha2-macroglobulin	b2520	alpha2-macroglobulin	4763752.0
1	1					657	sim7	2763067	700	sim7	51	IS30_IS30	2763067	2764287.0	NC_000913.3_art_ISs	2762566.0	2763066.0		2764288.0	2764788.0	NC_000913.3	2694190.0				2695191.0	IS only present in query Strain.	1. DLIS	Complete IS hit.	-	Intergenic/Pseudo/Repeaed Region	-	Intergenic/Pseudo/Repeaed Region	b2557	phosphoribosylformylglycinamide synthetase	b2557	phosphoribosylformylglycinamide synthetase	4763752.0
1	1					658	sim7	2838639	701	sim7	52	IS30_IS30	2838639	2839859.0	NC_000913.3_art_ISs	2838138.0	2838638.0		2839860.0	2840360.0	NC_000913.3	267133.0				268129.0	IS only present in query Strain.	1. DLIS	Complete IS hit.	b2632	CP4-57 prophage; putative GTP-binding protein YfjP	-	Intergenic/Pseudo/Repeaed Region	-	Intergenic/Pseudo/Repeaed Region	b0253	CP4-6 prophage; putative GTP-binding protein YkfA	4763752.0
1	1					659	sim7	2884349	702	sim7	53	IS30_IS30	2884349	2885569.0	NC_000913.3_art_ISs	2883848.0	2884348.0		2885570.0	2886070.0	NC_000913.3	2813030.0				2814031.0	IS only present in query Strain.	1. DLIS	Complete IS hit.	-	Intergenic/Pseudo/Repeaed Region	-	Intergenic/Pseudo/Repeaed Region	b2686	multidrug efflux pump membrane subunit EmrB	b2686	multidrug efflux pump membrane subunit EmrB	4763752.0
1	1					660	sim7	2907512	703	sim7	54	IS30_IS30	2907512	2908732.0	NC_000913.3_art_ISs	2907011.0	2907511.0		2908733.0	2909233.0	NC_000913.3	2834972.0				2835973.0	IS only present in query Strain.	1. DLIS	Complete IS hit.	b2711	NADH:flavorubredoxin reductase	-	Intergenic/Pseudo/Repeaed Region	b2711	NADH:flavorubredoxin reductase	b2712	carbamoyltransferase HypF	4763752.0
1	1					663	sim7	3032718	704	sim7	55	IS30_IS30	3032718	3033938.0	NC_000913.3_art_ISs	3032217.0	3032717.0		3033939.0	3034439.0	NC_000913.3	2956515.0				2957516.0	IS only present in query Strain.	1. DLIS	Complete IS hit.	-	Intergenic/Pseudo/Repeaed Region	-	Intergenic/Pseudo/Repeaed Region	b2821	protease 3	b2821	protease 3	4763752.0
1	1					664	sim7	3046702	705	sim7	56	IS30_IS30	3046702	3047922.0	NC_000913.3_art_ISs	3046201.0	3046701.0		3047923.0	3048423.0	NC_000913.3	2969278.0				2970279.0	IS only present in query Strain.	1. DLIS	Complete IS hit.	-	Intergenic/Pseudo/Repeaed Region	-	Intergenic/Pseudo/Repeaed Region	-	Intergenic/Pseudo/Repeaed Region	b2831	DNA mismatch repair protein MutH	4763752.0
1	1					665	sim7	3067561	706	sim7	57	IS30_IS30	3067561	3068781.0	NC_000913.3_art_ISs	3067060.0	3067560.0		3068782.0	3069282.0	NC_000913.3	2988916.0				2989917.0	IS only present in query Strain.	1. DLIS	Complete IS hit.	b2847	putative transcriptional regulator YqeI	-	Intergenic/Pseudo/Repeaed Region	b2847	putative transcriptional regulator YqeI	-	Intergenic/Pseudo/Repeaed Region	4763752.0
1	1					666	sim7	3070678	707	sim7	58	IS30_IS30	3070678	3071898.0	NC_000913.3_art_ISs	3070177.0	3070677.0		3071899.0	3072399.0	NC_000913.3	2990812.0				2991813.0	IS only present in query Strain.	1. DLIS	Complete IS hit.	b2850	protein YgeF	-	Intergenic/Pseudo/Repeaed Region	b2850	protein YgeF	-	Intergenic/Pseudo/Repeaed Region	4763752.0
1	1					667	sim7	3105223	708	sim7	59	IS30_IS30	3105223	3106443.0	NC_000913.3_art_ISs	3104722.0	3105222.0		3106444.0	3106944.0	NC_000913.3	3024136.0				3025137.0	IS only present in query Strain.	1. DLIS	Complete IS hit.	b2881	fused putative xanthine/hypoxanthine oxidase: molybdopterin-binding subunit and Fe-S binding subunit	-	Intergenic/Pseudo/Repeaed Region	b2881	fused putative xanthine/hypoxanthine oxidase: molybdopterin-binding subunit and Fe-S binding subunit	b2882	xanthine:H(+) symporter XanQ	4763752.0
1	1					668	sim7	3112503	709	sim7	60	IS30_IS30	3112503	3113723.0	NC_000913.3_art_ISs	3112002.0	3112502.0		3113724.0	3114224.0	NC_000913.3	3030195.0				3031196.0	IS only present in query Strain.	1. DLIS	Complete IS hit.	-	Intergenic/Pseudo/Repeaed Region	-	Intergenic/Pseudo/Repeaed Region	b2887	fused putative oxidoreductase; Fe-S subunit and nucleotide-binding subunit	-	Intergenic/Pseudo/Repeaed Region	4763752.0
1	1					669	sim7	3149308	710	sim7	61	IS30_IS30	3149308	3150528.0	NC_000913.3_art_ISs	3148807.0	3149307.0		3150529.0	3151029.0	NC_000913.3	3065779.0				3066780.0	IS only present in query Strain.	1. DLIS	Complete IS hit.	-	Intergenic/Pseudo/Repeaed Region	-	Intergenic/Pseudo/Repeaed Region	b2920	propionyl-CoA:succinate CoA transferase	b2921	putative LysR-type DNA-binding transcriptional regulator YgfI	4763752.0
1	1					670	sim7	3168090	711	sim7	62	IS30_IS30	3168090	3169310.0	NC_000913.3_art_ISs	3167589.0	3168089.0		3169311.0	3169811.0	NC_000913.3	3083340.0				3084341.0	IS only present in query Strain.	1. DLIS	Complete IS hit.	b2937	agmatinase	b2938	arginine decarboxylase; biosynthetic	b2937	agmatinase	b2938	arginine decarboxylase; biosynthetic	4763752.0
1	1					671	sim7	3179067	712	sim7	63	IS30_IS30	3179067	3180287.0	NC_000913.3_art_ISs	3178566.0	3179066.0		3180288.0	3180788.0	NC_000913.3	3093096.0				3094097.0	IS only present in query Strain.	1. DLIS	Complete IS hit.	b2948	DUF179 domain-containing protein YqgE	-	Intergenic/Pseudo/Repeaed Region	b2948	DUF179 domain-containing protein YqgE	-	Intergenic/Pseudo/Repeaed Region	4763752.0
1	1					672	sim7	3268586	713	sim7	64	IS30_IS30	3268586	3269806.0	NC_000913.3_art_ISs	3268085.0	3268585.0		3269807.0	3270307.0	NC_000913.3	3181394.0				3182395.0	IS only present in query Strain.	1. DLIS	Complete IS hit.	b3038	putative enzyme with ATPase activity	-	Intergenic/Pseudo/Repeaed Region	b3038	putative enzyme with ATPase activity	b3039	4;5-DOPA dioxygenase extradiol	4763752.0
1	1					673	sim7	3277208	714	sim7	65	IS30_IS30	3277208	3278428.0	NC_000913.3_art_ISs	3276707.0	3277207.0		3278429.0	3278929.0	NC_000913.3	3188795.0				3189796.0	IS only present in query Strain.	1. DLIS	Complete IS hit.	-	Intergenic/Pseudo/Repeaed Region	-	Intergenic/Pseudo/Repeaed Region	b3046	putative outer membrane usher protein YqiG	b3046	putative outer membrane usher protein YqiG	4763752.0
1	1					674	sim7	3383223	715	sim7	66	IS30_IS30	3383223	3384443.0	NC_000913.3_art_ISs	3382722.0	3383222.0		3384444.0	3384944.0	NC_000913.3	3293589.0				3294590.0	IS only present in query Strain.	1. DLIS	Complete IS hit.	-	Intergenic/Pseudo/Repeaed Region	-	Intergenic/Pseudo/Repeaed Region	b3147	outer membrane lipoprotein - activator of MrcA activity	b3147	outer membrane lipoprotein - activator of MrcA activity	4763752.0
1	1					675	sim7	3429888	716	sim7	67	IS30_IS30	3429888	3431108.0	NC_000913.3_art_ISs	3429387.0	3429887.0		3431109.0	3431609.0	NC_000913.3	3339033.0				3340034.0	IS only present in query Strain.	1. DLIS	Complete IS hit.	b3194	intermembrane phospholipid transport system; integral membrane subunit MlaE	-	Intergenic/Pseudo/Repeaed Region	b3194	intermembrane phospholipid transport system; integral membrane subunit MlaE	b3195	intermembrane phospholipid transport system; ATP binding subunit MlaF	4763752.0
1	1					676	sim7	3447950	717	sim7	68	IS30_IS30	3447950	3449170.0	NC_000913.3_art_ISs	3447449.0	3447949.0		3449171.0	3449671.0	NC_000913.3	3355874.0				3356875.0	IS only present in query Strain.	1. DLIS	Complete IS hit.	-	Intergenic/Pseudo/Repeaed Region	-	Intergenic/Pseudo/Repeaed Region	b3212	glutamate synthase subunit GltB	b3212	glutamate synthase subunit GltB	4763752.0
1	1					677	sim7	3450556	718	sim7	69	IS30_IS30	3450556	3451776.0	NC_000913.3_art_ISs	3450055.0	3450555.0		3451777.0	3452277.0	NC_000913.3	3357259.0				3358260.0	IS only present in query Strain.	1. DLIS	Complete IS hit.	-	Intergenic/Pseudo/Repeaed Region	-	Intergenic/Pseudo/Repeaed Region	b3212	glutamate synthase subunit GltB	b3212	glutamate synthase subunit GltB	4763752.0
1	1					678	sim7	3471339	719	sim7	70	IS30_IS30	3471339	3472559.0	NC_000913.3_art_ISs	3470838.0	3471338.0		3472560.0	3473060.0	NC_000913.3	3376821.0				3377822.0	IS only present in query Strain.	1. DLIS	Complete IS hit.	-	Intergenic/Pseudo/Repeaed Region	b3230	30S ribosomal subunit protein S9	b3229	stringent starvation protein A	b3230	30S ribosomal subunit protein S9	4763752.0
1	1					679	sim7	3485250	720	sim7	71	IS30_IS30	3485250	3486470.0	NC_000913.3_art_ISs	3484749.0	3485249.0		3486471.0	3486971.0	NC_000913.3	3389511.0				3390512.0	IS only present in query Strain.	1. DLIS	Complete IS hit.	-	Intergenic/Pseudo/Repeaed Region	-	Intergenic/Pseudo/Repeaed Region	-	Intergenic/Pseudo/Repeaed Region	-	Intergenic/Pseudo/Repeaed Region	4763752.0
1	1					680	sim7	3494125	721	sim7	72	IS30_IS30	3494125	3495345.0	NC_000913.3_art_ISs	3493624.0	3494124.0		3495346.0	3495846.0	NC_000913.3	3397165.0				3398166.0	IS only present in query Strain.	1. DLIS	Complete IS hit.	-	Intergenic/Pseudo/Repeaed Region	b3248	nucleoside triphosphate pyrophosphatase YhdE	b3247	RNase G	b3248	nucleoside triphosphate pyrophosphatase YhdE	4763752.0
1	1					681	sim7	3567323	722	sim7	73	IS30_IS30	3567323	3568543.0	NC_000913.3_art_ISs	3566822.0	3567322.0		3568544.0	3569044.0	NC_000913.3	3469142.0				3470143.0	IS only present in query Strain.	1. DLIS	Complete IS hit.	-	Intergenic/Pseudo/Repeaed Region	-	Intergenic/Pseudo/Repeaed Region	b3338	endochitinase	-	Intergenic/Pseudo/Repeaed Region	4763752.0
1	1					682	sim7	3595437	723	sim7	74	IS30_IS30	3595437	3596657.0	NC_000913.3_art_ISs	3594936.0	3595436.0		3596658.0	3597158.0	NC_000913.3	3496035.0				3497036.0	IS only present in query Strain.	1. DLIS	Complete IS hit.	-	Intergenic/Pseudo/Repeaed Region	b3367	nitrite transporter NirC	b3365	nitrite reductase catalytic subunit NirB	b3367	nitrite transporter NirC	4763752.0
1	1					683	sim7	3628211	724	sim7	75	IS30_IS30	3628211	3629431.0	NC_000913.3_art_ISs	3627710.0	3628210.0		3629432.0	3629932.0	NC_000913.3	3527588.0				3528589.0	IS only present in query Strain.	1. DLIS	Complete IS hit.	-	Intergenic/Pseudo/Repeaed Region	-	Intergenic/Pseudo/Repeaed Region	b3398	inner membrane protein - inhibits the Rcs signaling pathway	b3398	inner membrane protein - inhibits the Rcs signaling pathway	4763752.0
1	1					684	sim7	3653020	725	sim7	76	IS30_IS30	3653020	3654240.0	NC_000913.3_art_ISs	3652519.0	3653019.0		3654241.0	3654741.0	NC_000913.3	3551176.0				3552177.0	IS only present in query Strain.	1. DLIS	Complete IS hit.	-	Intergenic/Pseudo/Repeaed Region	-	Intergenic/Pseudo/Repeaed Region	b3417	maltodextrin phosphorylase	b3417	maltodextrin phosphorylase	4763752.0
1	1					685	sim7	3685313	726	sim7	77	IS30_IS30	3685313	3686533.0	NC_000913.3_art_ISs	3684812.0	3685312.0		3686534.0	3687034.0	NC_000913.3	3582248.0				3583249.0	IS only present in query Strain.	1. DLIS	Complete IS hit.	-	Intergenic/Pseudo/Repeaed Region	b3443	putative uncharacterized protein YrhA	b3442	putative endonuclease YhhZ	b3443	putative uncharacterized protein YrhA	4763752.0
1	1					686	sim7	3709225	727	sim7	78	IS30_IS30	3709225	3710445.0	NC_000913.3_art_ISs	3708724.0	3709224.0		3710446.0	3710946.0	NC_000913.3	3604939.0				3605940.0	IS only present in query Strain.	1. DLIS	Complete IS hit.	b3465	16S rRNA m(2)G966 methyltransferase	b3468	conserved inner membrane enzyme YhhN	b3465	16S rRNA m(2)G966 methyltransferase	b3468	conserved inner membrane enzyme YhhN	4763752.0
1	1					687	sim7	3715874	728	sim7	79	IS30_IS30	3715874	3717094.0	NC_000913.3_art_ISs	3715373.0	3715873.0		3717095.0	3717595.0	NC_000913.3	3610367.0				3611368.0	IS only present in query Strain.	1. DLIS	Complete IS hit.	b3472	periplasmic bacteriophage sensitivity protein DcrB	-	Intergenic/Pseudo/Repeaed Region	b3472	periplasmic bacteriophage sensitivity protein DcrB	b3473	putative transporter YhhS	4763752.0
1	1					688	sim7	3748167	729	sim7	80	IS30_IS30	3748167	3749387.0	NC_000913.3_art_ISs	3747666.0	3748166.0		3749388.0	3749888.0	NC_000913.3	3641439.0				3642440.0	IS only present in query Strain.	1. DLIS	Complete IS hit.	-	Intergenic/Pseudo/Repeaed Region	b3497	16S rRNA m(2)G1516 methyltransferase	b3496	dipeptide/tripeptide:H(+) symporter DtpB	b3497	16S rRNA m(2)G1516 methyltransferase	4763752.0
1	1					689	sim7	3779409	730	sim7	81	IS30_IS30	3779409	3780629.0	NC_000913.3_art_ISs	3778908.0	3779408.0		3780630.0	3781130.0	NC_000913.3	3671460.0				3672461.0	IS only present in query Strain.	1. DLIS	Complete IS hit.	b3520	putative DNA-binding transcriptional regulator YhjB	b3521	putative DNA-binding transcriptional regulator YhjC	b3520	putative DNA-binding transcriptional regulator YhjB	b3521	putative DNA-binding transcriptional regulator YhjC	4763752.0
1	1					690	sim7	3790385	731	sim7	82	IS30_IS30	3790385	3791605.0	NC_000913.3_art_ISs	3789884.0	3790384.0		3791606.0	3792106.0	NC_000913.3	3681215.0				3682216.0	IS only present in query Strain.	1. DLIS	Complete IS hit.	-	Intergenic/Pseudo/Repeaed Region	b3528	C4 dicarboxylate/orotate:H(+) symporter	b3527	peptidase M16 family protein	b3528	C4 dicarboxylate/orotate:H(+) symporter	4763752.0
1	1					691	sim7	3991229	732	sim7	83	IS30_IS30	3991229	3992449.0	NC_000913.3_art_ISs	3990728.0	3991228.0		3992450.0	3992950.0	NC_000913.3	3880838.0				3881839.0	IS only present in query Strain.	1. DLIS	Complete IS hit.	b3700	DNA repair protein RecF	-	Intergenic/Pseudo/Repeaed Region	b3700	DNA repair protein RecF	b3701	beta sliding clamp	4763752.0
1	1					692	sim7	4019517	733	sim7	84	IS30_IS30	4019517	4020737.0	NC_000913.3_art_ISs	4019016.0	4019516.0		4020738.0	4021238.0	NC_000913.3	3907905.0				3908906.0	IS only present in query Strain.	1. DLIS	Complete IS hit.	b3725	phosphate ABC transporter ATP binding subunit	b3726	phosphate ABC transporter membrane subunit PstA	b3725	phosphate ABC transporter ATP binding subunit	b3726	phosphate ABC transporter membrane subunit PstA	4763752.0
1	1					693	sim7	4048990	734	sim7	85	IS30_IS30	4048990	4050210.0	NC_000913.3_art_ISs	4048489.0	4048989.0		4050211.0	4050711.0	NC_000913.3	3936157.0				3937158.0	IS only present in query Strain.	1. DLIS	Complete IS hit.	b3750	ribose ABC transporter membrane subunit	-	Intergenic/Pseudo/Repeaed Region	b3750	ribose ABC transporter membrane subunit	b3751	ribose ABC transporter periplasmic binding protein	4763752.0
1	1					694	sim7	4069360	735	sim7	86	IS30_IS30	4069360	4070580.0	NC_000913.3_art_ISs	4068859.0	4069359.0		4070581.0	4071081.0	NC_000913.3	3955306.0				3956307.0	IS only present in query Strain.	1. DLIS	Complete IS hit.	b3771	dihydroxy-acid dehydratase	-	Intergenic/Pseudo/Repeaed Region	b3771	dihydroxy-acid dehydratase	b3772	threonine deaminase	4763752.0
1	1					695	sim7	4126788	736	sim7	87	IS30_IS30	4126788	4128008.0	NC_000913.3_art_ISs	4126287.0	4126787.0		4128009.0	4128509.0	NC_000913.3	4011513.0				4012514.0	IS only present in query Strain.	1. DLIS	Complete IS hit.	b3827	biotin transporter	-	Intergenic/Pseudo/Repeaed Region	b3827	biotin transporter	b3828	DNA-binding transcriptional dual regulator MetR	4763752.0
1	1					696	sim7	4190875	737	sim7	88	IS30_IS30	4190875	4192095.0	NC_000913.3_art_ISs	4190374.0	4190874.0		4192096.0	4192596.0	NC_000913.3	4074379.0				4075380.0	IS only present in query Strain.	1. DLIS	Complete IS hit.	b3883	6-deoxy-6-sulfofructose kinase	-	Intergenic/Pseudo/Repeaed Region	b3883	6-deoxy-6-sulfofructose kinase	b3884	putative DNA-binding transcriptional regulator YihW	4763752.0
1	1					697	sim7	4376944	738	sim7	89	IS30_IS30	4376944	4378164.0	NC_000913.3_art_ISs	4376443.0	4376943.0		4378165.0	4378665.0	NC_000913.3	4259227.0				4260228.0	IS only present in query Strain.	1. DLIS	Complete IS hit.	-	Intergenic/Pseudo/Repeaed Region	-	Intergenic/Pseudo/Repeaed Region	-	Intergenic/Pseudo/Repeaed Region	-	Intergenic/Pseudo/Repeaed Region	4763752.0
1	1					698	sim7	4486936	739	sim7	90	IS30_IS30	4486936	4488156.0	NC_000913.3_art_ISs	4486435.0	4486935.0		4488157.0	4488657.0	NC_000913.3	4367998.0				4368999.0	IS only present in query Strain.	1. DLIS	Complete IS hit.	b4139	aspartate ammonia-lyase	b4140	protein FxsA	b4139	aspartate ammonia-lyase	b4140	protein FxsA	4763752.0
1	1					699	sim7	4510454	740	sim7	91	IS30_IS30	4510454	4511674.0	NC_000913.3_art_ISs	4509953.0	4510453.0		4511675.0	4512175.0	NC_000913.3	4390295.0				4391296.0	IS only present in query Strain.	1. DLIS	Complete IS hit.	b4160	phosphatidylserine decarboxylase proenzyme	-	Intergenic/Pseudo/Repeaed Region	b4160	phosphatidylserine decarboxylase proenzyme	b4161	ribosome small subunit-dependent GTPase A	4763752.0
1	1					700	sim7	4602807	741	sim7	92	IS30_IS30	4602807	4604027.0	NC_000913.3_art_ISs	4602306.0	4602806.0		4604028.0	4604528.0	NC_000913.3	4481427.0				4482428.0	IS only present in query Strain.	1. DLIS	Complete IS hit.	-	Intergenic/Pseudo/Repeaed Region	-	Intergenic/Pseudo/Repeaed Region	b4258	valine--tRNA ligase	b4258	valine--tRNA ligase	4763752.0
1	1					701	sim8	9589	758	sim8	0	IS30_IS30	9589	10809.0	NC_000913.3_art_ISs	9088.0	9588.0		10810.0	11310.0	NC_000913.3	9088.0				10089.0	IS only present in query Strain.	1. DLIS	Complete IS hit.	b0008	transaldolase B	b0010	acetate/succinate:H(+) symporter	b0008	transaldolase B	b0010	acetate/succinate:H(+) symporter	4763752.0
1	1					702	sim8	23941	759	sim8	1	IS30_IS30	23941	25161.0	NC_000913.3_art_ISs	23440.0	23940.0		25162.0	25662.0	NC_000913.3	22219.0				23220.0	IS only present in query Strain.	1. DLIS	Complete IS hit.	b0025	bifunctional riboflavin kinase/FMN adenylyltransferase	-	Intergenic/Pseudo/Repeaed Region	b0025	bifunctional riboflavin kinase/FMN adenylyltransferase	b0026	isoleucine--tRNA ligase	4763752.0
1	1					703	sim8	59612	760	sim8	2	IS30_IS30	59612	60832.0	NC_000913.3_art_ISs	59111.0	59611.0		60833.0	61333.0	NC_000913.3	56669.0				57670.0	IS only present in query Strain.	1. DLIS	Complete IS hit.	b0054	lipopolysaccharide assembly protein LptD	b0055	co-chaperone protein DjlA	b0054	lipopolysaccharide assembly protein LptD	b0055	co-chaperone protein DjlA	4763752.0
1	1					704	sim8	87078	761	sim8	3	IS30_IS30	87078	88298.0	NC_000913.3_art_ISs	86577.0	87077.0		88299.0	88799.0	NC_000913.3	82914.0				83915.0	IS only present in query Strain.	1. DLIS	Complete IS hit.	-	Intergenic/Pseudo/Repeaed Region	-	Intergenic/Pseudo/Repeaed Region	b0074	2-isopropylmalate synthase	-	Intergenic/Pseudo/Repeaed Region	4763752.0
1	1					705	sim8	124198	762	sim8	4	IS30_IS30	124198	125418.0	NC_000913.3_art_ISs	123697.0	124197.0		125419.0	125919.0	NC_000913.3	118813.0				119814.0	IS only present in query Strain.	1. DLIS	Complete IS hit.	b0110	1;6-anhydro-N-acetylmuramoyl-L-alanine amidase	-	Intergenic/Pseudo/Repeaed Region	b0110	1;6-anhydro-N-acetylmuramoyl-L-alanine amidase	b0111	protein AmpE	4763752.0
1	1					706	sim8	133163	763	sim8	5	IS30_IS30	133163	134383.0	NC_000913.3_art_ISs	132662.0	133162.0		134384.0	134884.0	NC_000913.3	126557.0				127558.0	IS only present in query Strain.	1. DLIS	Complete IS hit.	-	Intergenic/Pseudo/Repeaed Region	-	Intergenic/Pseudo/Repeaed Region	b0115	pyruvate dehydrogenase; E2 subunit	b0115	pyruvate dehydrogenase; E2 subunit	4763752.0
1	1					707	sim8	191289	764	sim8	6	IS30_IS30	191289	192509.0	NC_000913.3_art_ISs	190788.0	191288.0		192510.0	193010.0	NC_000913.3	183462.0				184463.0	IS only present in query Strain.	1. DLIS	Complete IS hit.	b0162	DNA-binding transcriptional activator CdaR	b0164	phosphodiesterase YaeI	b0162	DNA-binding transcriptional activator CdaR	b0164	phosphodiesterase YaeI	4763752.0
1	1					708	sim8	260447	765	sim8	7	IS30_IS30	260447	261667.0	NC_000913.3_art_ISs	259946.0	260446.0		261668.0	262168.0	NC_000913.3	251399.0				252400.0	IS only present in query Strain.	1. DLIS	Complete IS hit.	-	Intergenic/Pseudo/Repeaed Region	b0233	ribosome-dependent mRNA interferase toxin YafO	b0231	DNA polymerase IV	b0233	ribosome-dependent mRNA interferase toxin YafO	4763752.0
1	1					709	sim8	473399	766	sim8	8	IS30_IS30	473399	474619.0	NC_000913.3_art_ISs	472898.0	473398.0		474620.0	475120.0	NC_000913.3	463130.0				464131.0	IS only present in query Strain.	1. DLIS	Complete IS hit.	-	Intergenic/Pseudo/Repeaed Region	b0442	helix-hairpin-helix 3 family protein	b0441	periplasmic folding chaperone	b0442	helix-hairpin-helix 3 family protein	4763752.0
1	1					710	sim8	505965	767	sim8	9	IS30_IS30	505965	507185.0	NC_000913.3_art_ISs	505464.0	505964.0		507186.0	507686.0	NC_000913.3	494475.0				495476.0	IS only present in query Strain.	1. DLIS	Complete IS hit.	-	Intergenic/Pseudo/Repeaed Region	b0473	chaperone protein HtpG	b0472	DNA repair protein RecR	b0473	chaperone protein HtpG	4763752.0
1	1					711	sim8	534501	768	sim8	10	IS30_IS30	534501	535721.0	NC_000913.3_art_ISs	534000.0	534500.0		535722.0	536222.0	NC_000913.3	521790.0				522791.0	IS only present in query Strain.	1. DLIS	Complete IS hit.	-	Intergenic/Pseudo/Repeaed Region	-	Intergenic/Pseudo/Repeaed Region	b0496	putative ABC transporter membrane subunit YbbP	b0496	putative ABC transporter membrane subunit YbbP	4763752.0
1	1					712	sim8	537639	769	sim8	11	IS30_IS30	537639	538859.0	NC_000913.3_art_ISs	537138.0	537638.0		538860.0	539360.0	NC_000913.3	523707.0				524708.0	IS only present in query Strain.	1. DLIS	Complete IS hit.	-	Intergenic/Pseudo/Repeaed Region	-	Intergenic/Pseudo/Repeaed Region	b0497	protein RhsD	b0497	protein RhsD	4763752.0
1	1					713	sim8	564394	770	sim8	12	IS30_IS30	564394	565614.0	NC_000913.3_art_ISs	563893.0	564393.0		565615.0	566115.0	NC_000913.3	549241.0				550242.0	IS only present in query Strain.	1. DLIS	Complete IS hit.	b4572	DUF1116 domain-containing protein YlbE	-	Intergenic/Pseudo/Repeaed Region	b4572	DUF1116 domain-containing protein YlbE	b0520	DUF2877 domain-containing protein YlbF	4763752.0
1	1					714	sim8	591209	771	sim8	13	IS30_IS30	591209	592429.0	NC_000913.3_art_ISs	590708.0	591208.0		592430.0	592930.0	NC_000913.3	574835.0				575836.0	IS only present in query Strain.	1. DLIS	Complete IS hit.	-	Intergenic/Pseudo/Repeaed Region	-	Intergenic/Pseudo/Repeaed Region	b0552	DLP12 prophage; IS5 transposase and trans-activator	b0553	DLP12 prophage; putative outer membrane porin NmpC	4763752.0
1	1					715	sim8	667435	772	sim8	14	IS30_IS30	667435	668655.0	NC_000913.3_art_ISs	666934.0	667434.0		668656.0	669156.0	NC_000913.3	649840.0				650841.0	IS only present in query Strain.	1. DLIS	Complete IS hit.	-	Intergenic/Pseudo/Repeaed Region	b0618	citrate lyase synthetase	b0616	citrate lyase beta subunit	b0618	citrate lyase synthetase	4763752.0
1	1					716	sim8	674379	773	sim8	15	IS30_IS30	674379	675599.0	NC_000913.3_art_ISs	673878.0	674378.0		675600.0	676100.0	NC_000913.3	655563.0				656564.0	IS only present in query Strain.	1. DLIS	Complete IS hit.	b0621	anaerobic C4-dicarboxylate transporter DcuC	b0622	Lipid IVA palmitoyltransferase	b0621	anaerobic C4-dicarboxylate transporter DcuC	b0622	Lipid IVA palmitoyltransferase	4763752.0
1	1					717	sim8	702472	774	sim8	16	IS30_IS30	702472	703692.0	NC_000913.3_art_ISs	701971.0	702471.0		703693.0	704193.0	NC_000913.3	682435.0				683436.0	IS only present in query Strain.	1. DLIS	Complete IS hit.	-	Intergenic/Pseudo/Repeaed Region	-	Intergenic/Pseudo/Repeaed Region	b0650	chaperone protein HscC	-	Intergenic/Pseudo/Repeaed Region	4763752.0
1	1					718	sim8	716587	775	sim8	17	IS30_IS30	716587	717807.0	NC_000913.3_art_ISs	716086.0	716586.0		717808.0	718308.0	NC_000913.3	695329.0				696330.0	IS only present in query Strain.	1. DLIS	Complete IS hit.	-	Intergenic/Pseudo/Repeaed Region	-	Intergenic/Pseudo/Repeaed Region	b0662	2-octaprenyl-3-methyl-6-methoxy-1;4-benzoquinol hydroxylase	-	Intergenic/Pseudo/Repeaed Region	4763752.0
1	1					719	sim8	818582	776	sim8	18	IS30_IS30	818582	819802.0	NC_000913.3_art_ISs	818081.0	818581.0		819803.0	820303.0	NC_000913.3	796103.0				797104.0	IS only present in query Strain.	1. DLIS	Complete IS hit.	b0764	molybdate ABC transporter membrane subunit	-	Intergenic/Pseudo/Repeaed Region	b0764	molybdate ABC transporter membrane subunit	b0765	molybdate ABC transporter ATP binding subunit	4763752.0
1	1					720	sim8	849497	777	sim8	19	IS30_IS30	849497	850717.0	NC_000913.3_art_ISs	848996.0	849496.0		850718.0	851218.0	NC_000913.3	825797.0				826798.0	IS only present in query Strain.	1. DLIS	Complete IS hit.	b0792	putative ABC exporter membrane subunit YbhR	-	Intergenic/Pseudo/Repeaed Region	b0792	putative ABC exporter membrane subunit YbhR	b0793	putative ABC exporter membrane subunit YbhS	4763752.0
1	1					721	sim8	866906	778	sim8	20	IS30_IS30	866906	868126.0	NC_000913.3_art_ISs	866405.0	866905.0		868127.0	868627.0	NC_000913.3	841985.0				842986.0	IS only present in query Strain.	1. DLIS	Complete IS hit.	b0806	DUF1471 domain-containing protein McbA	-	Intergenic/Pseudo/Repeaed Region	b0806	DUF1471 domain-containing protein McbA	b0807	23S rRNA m(6)A1618 methyltransferase	4763752.0
1	1					722	sim8	878537	779	sim8	21	IS30_IS30	878537	879757.0	NC_000913.3_art_ISs	878036.0	878536.0		879758.0	880258.0	NC_000913.3	852395.0				853396.0	IS only present in query Strain.	1. DLIS	Complete IS hit.	b0815	phosphoethanolamine transferase	b0817	DNA-binding transcriptional dual regulator MntR	b0815	phosphoethanolamine transferase	b0817	DNA-binding transcriptional dual regulator MntR	4763752.0
1	1					723	sim8	940142	780	sim8	22	IS30_IS30	940142	941362.0	NC_000913.3_art_ISs	939641.0	940141.0		941363.0	941863.0	NC_000913.3	912779.0				913780.0	IS only present in query Strain.	1. DLIS	Complete IS hit.	-	Intergenic/Pseudo/Repeaed Region	-	Intergenic/Pseudo/Repeaed Region	b0873	protein S-nitrosylase	b0873	protein S-nitrosylase	4763752.0
1	1					724	sim8	974290	781	sim8	23	IS30_IS30	974290	975510.0	NC_000913.3_art_ISs	973789.0	974289.0		975511.0	976011.0	NC_000913.3	945706.0				946707.0	IS only present in query Strain.	1. DLIS	Complete IS hit.	-	Intergenic/Pseudo/Repeaed Region	-	Intergenic/Pseudo/Repeaed Region	-	Intergenic/Pseudo/Repeaed Region	b0898	putative transporter YcaD	4763752.0
1	1					725	sim8	1141140	782	sim8	24	IS30_IS30	1141140	1142360.0	NC_000913.3_art_ISs	1140639.0	1141139.0		1142361.0	1142861.0	NC_000913.3	1111335.0				1112336.0	IS only present in query Strain.	1. DLIS	Complete IS hit.	-	Intergenic/Pseudo/Repeaed Region	-	Intergenic/Pseudo/Repeaed Region	b1049	osmoregulated periplasmic glucans (OPGs) biosynthesis protein H	b1049	osmoregulated periplasmic glucans (OPGs) biosynthesis protein H	4763752.0
1	1					726	sim8	1147714	783	sim8	25	IS30_IS30	1147714	1148934.0	NC_000913.3_art_ISs	1147213.0	1147713.0		1148935.0	1149435.0	NC_000913.3	1116688.0				1117689.0	IS only present in query Strain.	1. DLIS	Complete IS hit.	-	Intergenic/Pseudo/Repeaed Region	-	Intergenic/Pseudo/Repeaed Region	-	Intergenic/Pseudo/Repeaed Region	b1055	UPF0176 protein YceA	4763752.0
1	1					727	sim8	1233070	784	sim8	26	IS30_IS30	1233070	1234290.0	NC_000913.3_art_ISs	1232569.0	1233069.0		1234291.0	1234791.0	NC_000913.3	1200823.0				1201824.0	IS only present in query Strain.	1. DLIS	Complete IS hit.	b1141	e14 prophage; putative excisionase	b1143	e14 prophage; protein YmfI	b1141	e14 prophage; putative excisionase	b1143	e14 prophage; protein YmfI	4763752.0
1	1					728	sim8	1248299	785	sim8	27	IS30_IS30	1248299	1249519.0	NC_000913.3_art_ISs	1247798.0	1248298.0		1249520.0	1250020.0	NC_000913.3	1214831.0				1215832.0	IS only present in query Strain.	1. DLIS	Complete IS hit.	-	Intergenic/Pseudo/Repeaed Region	b1164	putative two-component system connector protein YcgZ	b1163	blue light-responsive regulator of BluR	b1164	putative two-component system connector protein YcgZ	4763752.0
1	1					731	sim8	1375362	786	sim8	28	IS30_IS30	1375362	1376582.0	NC_000913.3_art_ISs	1374861.0	1375361.0		1376583.0	1377083.0	NC_000913.3	1338231.0				1339232.0	IS only present in query Strain.	1. DLIS	Complete IS hit.	b1276	aconitate hydratase 1	-	Intergenic/Pseudo/Repeaed Region	b1276	aconitate hydratase 1	-	Intergenic/Pseudo/Repeaed Region	4763752.0
1	1					732	sim8	1511147	787	sim8	29	IS30_IS30	1511147	1512367.0	NC_000913.3_art_ISs	1510646.0	1511146.0		1512368.0	1512868.0	NC_000913.3	1472795.0				1473796.0	IS only present in query Strain.	1. DLIS	Complete IS hit.	-	Intergenic/Pseudo/Repeaed Region	-	Intergenic/Pseudo/Repeaed Region	b4492	putative outer membrane protein; N-terminal fragment	b4492	putative outer membrane protein; N-terminal fragment	4763752.0
1	1					733	sim8	1597019	788	sim8	30	IS30_IS30	1597019	1598239.0	NC_000913.3_art_ISs	1596518.0	1597018.0		1598240.0	1598740.0	NC_000913.3	1557446.0				1558447.0	IS only present in query Strain.	1. DLIS	Complete IS hit.	-	Intergenic/Pseudo/Repeaed Region	b1484	putative D;D-dipeptide ABC transporter ATP-binding subunit DdpD	b1483	putative D;D-dipeptide ABC transporter ATP-binding subunit DdpF	b1484	putative D;D-dipeptide ABC transporter ATP-binding subunit DdpD	4763752.0
1	1					734	sim8	1674815	789	sim8	31	IS30_IS30	1674815	1676035.0	NC_000913.3_art_ISs	1674314.0	1674814.0		1676036.0	1676536.0	NC_000913.3	1432274.0				1433275.0	IS only present in query Strain.	1. DLIS	Complete IS hit.	b1545	Qin prophage; putative site-specific recombinase	b1547	Qin prophage; putative side tail fiber assembly protein	b1372	Rac prophage; putative membrane protein	b1374	Rac prophage; putative site-specific recombinase	4763752.0
1	1					735	sim8	1752476	790	sim8	32	IS30_IS30	1752476	1753696.0	NC_000913.3_art_ISs	1751975.0	1752475.0		1753697.0	1754197.0	NC_000913.3	1710461.0				1711462.0	IS only present in query Strain.	1. DLIS	Complete IS hit.	b1631	SoxR [2Fe-2S] reducing system protein RsxG	-	Intergenic/Pseudo/Repeaed Region	b1631	SoxR [2Fe-2S] reducing system protein RsxG	b1632	SoxR [2Fe-2S] reducing system protein RsxE	4763752.0
1	1					736	sim8	1780082	791	sim8	33	IS30_IS30	1780082	1781302.0	NC_000913.3_art_ISs	1779581.0	1780081.0		1781303.0	1781803.0	NC_000913.3	1736846.0				1737847.0	IS only present in query Strain.	1. DLIS	Complete IS hit.	b1657	putative transporter YdhP	b1658	DNA-binding transcriptional repressor PurR	b1657	putative transporter YdhP	b1658	DNA-binding transcriptional repressor PurR	4763752.0
1	1					737	sim8	1946705	792	sim8	34	IS30_IS30	1946705	1947925.0	NC_000913.3_art_ISs	1946204.0	1946704.0		1947926.0	1948426.0	NC_000913.3	1902248.0				1903249.0	IS only present in query Strain.	1. DLIS	Complete IS hit.	-	Intergenic/Pseudo/Repeaed Region	b1818	mannose-specific PTS enzyme IIC component	b1817	mannose-specific PTS enzyme IIAB component	b1818	mannose-specific PTS enzyme IIC component	4763752.0
1	1					741	sim8	2019045	793	sim8	35	IS30_IS30	2019045	2020265.0	NC_000913.3_art_ISs	2018544.0	2019044.0		2020266.0	2020766.0	NC_000913.3	1969704.0				1970705.0	IS only present in query Strain.	1. DLIS	Complete IS hit.	-	Intergenic/Pseudo/Repeaed Region	-	Intergenic/Pseudo/Repeaed Region	b1885	methyl-accepting chemotaxis protein Tap	b1885	methyl-accepting chemotaxis protein Tap	4763752.0
1	1					742	sim8	2115359	794	sim8	36	IS30_IS30	2115359	2116579.0	NC_000913.3_art_ISs	2114858.0	2115358.0		2116580.0	2117080.0	NC_000913.3	2064797.0				2065798.0	IS only present in query Strain.	1. DLIS	Complete IS hit.	b1992	cobalamin 5'-phosphate synthase	-	Intergenic/Pseudo/Repeaed Region	b1992	cobalamin 5'-phosphate synthase	-	Intergenic/Pseudo/Repeaed Region	4763752.0
1	1					743	sim8	2255350	795	sim8	37	IS30_IS30	2255350	2256570.0	NC_000913.3_art_ISs	2254849.0	2255349.0		2256571.0	2257071.0	NC_000913.3	2203567.0				2204568.0	IS only present in query Strain.	1. DLIS	Complete IS hit.	b2118	DUF4132 domain-containing protein YehI	-	Intergenic/Pseudo/Repeaed Region	b2118	DUF4132 domain-containing protein YehI	-	Intergenic/Pseudo/Repeaed Region	4763752.0
1	1					744	sim8	2279423	796	sim8	38	IS30_IS30	2279423	2280643.0	NC_000913.3_art_ISs	2278922.0	2279422.0		2280644.0	2281144.0	NC_000913.3	2226419.0				2227420.0	IS only present in query Strain.	1. DLIS	Complete IS hit.	-	Intergenic/Pseudo/Repeaed Region	b2139	putative multidrug resistance outer membrane protein MdtQ	-	Intergenic/Pseudo/Repeaed Region	b2139	putative multidrug resistance outer membrane protein MdtQ	4763752.0
1	1					745	sim8	2287877	797	sim8	39	IS30_IS30	2287877	2289097.0	NC_000913.3_art_ISs	2287376.0	2287876.0		2289098.0	2289598.0	NC_000913.3	2233652.0				2234653.0	IS only present in query Strain.	1. DLIS	Complete IS hit.	b2145	DUF2542 domain-containing protein YeiS	-	Intergenic/Pseudo/Repeaed Region	b2145	DUF2542 domain-containing protein YeiS	b2146	NAD-dependent dihydropyrimidine dehydrogenase subunit PreT	4763752.0
1	1					746	sim8	2477238	798	sim8	40	IS30_IS30	2477238	2478458.0	NC_000913.3_art_ISs	2476737.0	2477237.0		2478459.0	2478959.0	NC_000913.3	2421792.0				2422793.0	IS only present in query Strain.	1. DLIS	Complete IS hit.	-	Intergenic/Pseudo/Repeaed Region	b2305	recombination-promoting nuclease RpnB	b2304	putative NAD-dependent epimerase YfcH	b2305	recombination-promoting nuclease RpnB	4763752.0
1	1					747	sim8	2480137	799	sim8	41	IS30_IS30	2480137	2481357.0	NC_000913.3_art_ISs	2479636.0	2480136.0		2481358.0	2481858.0	NC_000913.3	2423470.0				2424471.0	IS only present in query Strain.	1. DLIS	Complete IS hit.	b2305	recombination-promoting nuclease RpnB	-	Intergenic/Pseudo/Repeaed Region	b2305	recombination-promoting nuclease RpnB	b2306	lysine/arginine/ornithine ABC transporter/histidine ABC transporter; ATP binding subunit	4763752.0
1	1					748	sim8	2515413	800	sim8	42	IS30_IS30	2515413	2516633.0	NC_000913.3_art_ISs	2514912.0	2515412.0		2516634.0	2517134.0	NC_000913.3	2457525.0				2458526.0	IS only present in query Strain.	1. DLIS	Complete IS hit.	-	Intergenic/Pseudo/Repeaed Region	-	Intergenic/Pseudo/Repeaed Region	b2341	3-hydroxyacyl-CoA dehydrogenase FadJ	b2341	3-hydroxyacyl-CoA dehydrogenase FadJ	4763752.0
1	1					749	sim8	2534536	801	sim8	43	IS30_IS30	2534536	2535756.0	NC_000913.3_art_ISs	2534035.0	2534535.0		2535757.0	2536257.0	NC_000913.3	2475427.0				2476428.0	IS only present in query Strain.	1. DLIS	Complete IS hit.	b2361	CPS-53 (KpLE1) prophage; 5'-deoxynucleotidase	b4501	CPS-53 (KpLE1) prophage; prophage CPS-53 recombination directionality factor and response regulator inhibitor	b2361	CPS-53 (KpLE1) prophage; 5'-deoxynucleotidase	b4501	CPS-53 (KpLE1) prophage; prophage CPS-53 recombination directionality factor and response regulator inhibitor	4763752.0
1	1					750	sim8	2584400	802	sim8	44	IS30_IS30	2584400	2585620.0	NC_000913.3_art_ISs	2583899.0	2584399.0		2585621.0	2586121.0	NC_000913.3	2524070.0				2525071.0	IS only present in query Strain.	1. DLIS	Complete IS hit.	-	Intergenic/Pseudo/Repeaed Region	-	Intergenic/Pseudo/Repeaed Region	b2407	xanthosine phosphorylase	-	Intergenic/Pseudo/Repeaed Region	4763752.0
1	1					751	sim8	2662886	803	sim8	45	IS30_IS30	2662886	2664106.0	NC_000913.3_art_ISs	2662385.0	2662885.0		2664107.0	2664607.0	NC_000913.3	2601335.0				2602336.0	IS only present in query Strain.	1. DLIS	Complete IS hit.	b2481	hydrogenase 4 component A	-	Intergenic/Pseudo/Repeaed Region	b2481	hydrogenase 4 component A	b2482	hydrogenase 4 component B	4763752.0
1	1					752	sim8	2692225	804	sim8	46	IS30_IS30	2692225	2693445.0	NC_000913.3_art_ISs	2691724.0	2692224.0		2693446.0	2693946.0	NC_000913.3	2629453.0				2630454.0	IS only present in query Strain.	1. DLIS	Complete IS hit.	b2504	protein YfgG	b2506	nalidixic acid resistance protein YfgI	b2504	protein YfgG	b2506	nalidixic acid resistance protein YfgI	4763752.0
1	1					753	sim8	2705613	805	sim8	47	IS30_IS30	2705613	2706833.0	NC_000913.3_art_ISs	2705112.0	2705612.0		2706834.0	2707334.0	NC_000913.3	2641620.0				2642621.0	IS only present in query Strain.	1. DLIS	Complete IS hit.	b2515	(E)-4-hydroxy-3-methylbut-2-enyl-diphosphate synthase (flavodoxin)	-	Intergenic/Pseudo/Repeaed Region	b2515	(E)-4-hydroxy-3-methylbut-2-enyl-diphosphate synthase (flavodoxin)	b2516	transmembrane component of cytoskeleton	4763752.0
1	1					754	sim8	2714546	806	sim8	48	IS30_IS30	2714546	2715766.0	NC_000913.3_art_ISs	2714045.0	2714545.0		2715767.0	2716267.0	NC_000913.3	2649332.0				2650333.0	IS only present in query Strain.	1. DLIS	Complete IS hit.	-	Intergenic/Pseudo/Repeaed Region	-	Intergenic/Pseudo/Repeaed Region	b2520	alpha2-macroglobulin	b2520	alpha2-macroglobulin	4763752.0
1	1					755	sim8	2744599	807	sim8	49	IS30_IS30	2744599	2745819.0	NC_000913.3_art_ISs	2744098.0	2744598.0		2745820.0	2746320.0	NC_000913.3	2678164.0				2679165.0	IS only present in query Strain.	1. DLIS	Complete IS hit.	b2547	putative ABC transporter ATP-binding protein YphE	-	Intergenic/Pseudo/Repeaed Region	b2547	putative ABC transporter ATP-binding protein YphE	b2548	putative ABC transporter periplasmic binding protein YphF	4763752.0
1	1					756	sim8	2797724	808	sim8	50	IS30_IS30	2797724	2798944.0	NC_000913.3_art_ISs	2797223.0	2797723.0		2798945.0	2799445.0	NC_000913.3	2730068.0				2731069.0	IS only present in query Strain.	1. DLIS	Complete IS hit.	-	Intergenic/Pseudo/Repeaed Region	-	Intergenic/Pseudo/Repeaed Region	-	Intergenic/Pseudo/Repeaed Region	-	Intergenic/Pseudo/Repeaed Region	4763752.0
1	1					757	sim8	2818625	809	sim8	51	IS30_IS30	2818625	2819845.0	NC_000913.3_art_ISs	2818124.0	2818624.0		2819846.0	2820346.0	NC_000913.3	2749748.0				2750749.0	IS only present in query Strain.	1. DLIS	Complete IS hit.	b4461	putative inner membrane protein	-	Intergenic/Pseudo/Repeaed Region	b4461	putative inner membrane protein	-	Intergenic/Pseudo/Repeaed Region	4763752.0
1	1					758	sim8	2993020	810	sim8	52	IS30_IS30	2993020	2994240.0	NC_000913.3_art_ISs	2992519.0	2993019.0		2994241.0	2994741.0	NC_000913.3	2922922.0				2923923.0	IS only present in query Strain.	1. DLIS	Complete IS hit.	b2790	putative flavodoxin YqcA	b2792	DUF446 domain-containing protein YqcC	b2790	putative flavodoxin YqcA	b2792	DUF446 domain-containing protein YqcC	4763752.0
1	1					759	sim8	3099625	811	sim8	53	IS30_IS30	3099625	3100845.0	NC_000913.3_art_ISs	3099124.0	3099624.0		3100846.0	3101346.0	NC_000913.3	3028306.0				3029307.0	IS only present in query Strain.	1. DLIS	Complete IS hit.	b4464	guanine/hypoxanthine transporter GhxQ	b2887	fused putative oxidoreductase; Fe-S subunit and nucleotide-binding subunit	b4464	guanine/hypoxanthine transporter GhxQ	b2887	fused putative oxidoreductase; Fe-S subunit and nucleotide-binding subunit	4763752.0
1	1					760	sim8	3224187	812	sim8	54	IS30_IS30	3224187	3225407.0	NC_000913.3_art_ISs	3223686.0	3224186.0		3225408.0	3225908.0	NC_000913.3	3151647.0				3152648.0	IS only present in query Strain.	1. DLIS	Complete IS hit.	b3006	Ton complex subunit ExbB	b3008	cystathionine beta-lyase/L-cysteine desulfhydrase	b3006	Ton complex subunit ExbB	b3008	cystathionine beta-lyase/L-cysteine desulfhydrase	4763752.0
1	1					761	sim8	3281862	813	sim8	55	IS30_IS30	3281862	3283082.0	NC_000913.3_art_ISs	3281361.0	3281861.0		3283083.0	3283583.0	NC_000913.3	3208101.0				3209102.0	IS only present in query Strain.	1. DLIS	Complete IS hit.	-	Intergenic/Pseudo/Repeaed Region	-	Intergenic/Pseudo/Repeaed Region	b3063	L-tartrate:succinate antiporter	b3063	L-tartrate:succinate antiporter	4763752.0
1	1					762	sim8	3302080	814	sim8	56	IS30_IS30	3302080	3303300.0	NC_000913.3_art_ISs	3301579.0	3302079.0		3303301.0	3303801.0	NC_000913.3	3227098.0				3228099.0	IS only present in query Strain.	1. DLIS	Complete IS hit.	-	Intergenic/Pseudo/Repeaed Region	b3079	protein YgjJ	b3078	putative transporter YgjI	b3079	protein YgjJ	4763752.0
1	1					763	sim8	3351169	815	sim8	57	IS30_IS30	3351169	3352389.0	NC_000913.3_art_ISs	3350668.0	3351168.0		3352390.0	3352890.0	NC_000913.3	3274966.0				3275967.0	IS only present in query Strain.	1. DLIS	Complete IS hit.	-	Intergenic/Pseudo/Repeaed Region	-	Intergenic/Pseudo/Repeaed Region	-	Intergenic/Pseudo/Repeaed Region	b3128	galactarate dehydratase	4763752.0
1	1					766	sim8	3411959	816	sim8	58	IS30_IS30	3411959	3413179.0	NC_000913.3_art_ISs	3411458.0	3411958.0		3413180.0	3413680.0	NC_000913.3	3332093.0				3333094.0	IS only present in query Strain.	1. DLIS	Complete IS hit.	-	Intergenic/Pseudo/Repeaed Region	b3185	50S ribosomal subunit protein L27	b3184	inner membrane protein YhbE	b3185	50S ribosomal subunit protein L27	4763752.0
1	1					767	sim8	3423763	817	sim8	59	IS30_IS30	3423763	3424983.0	NC_000913.3_art_ISs	3423262.0	3423762.0		3424984.0	3425484.0	NC_000913.3	3342676.0				3343677.0	IS only present in query Strain.	1. DLIS	Complete IS hit.	b3198	3-deoxy-D-manno-octulosonate 8-phosphate phosphatase KdsC	b3200	lipopolysaccharide transport system protein LptA	b3198	3-deoxy-D-manno-octulosonate 8-phosphate phosphatase KdsC	b3200	lipopolysaccharide transport system protein LptA	4763752.0
1	1					768	sim8	3462998	818	sim8	60	IS30_IS30	3462998	3464218.0	NC_000913.3_art_ISs	3462497.0	3462997.0		3464219.0	3464719.0	NC_000913.3	3380690.0				3381691.0	IS only present in query Strain.	1. DLIS	Complete IS hit.	-	Intergenic/Pseudo/Repeaed Region	-	Intergenic/Pseudo/Repeaed Region	-	Intergenic/Pseudo/Repeaed Region	b3234	periplasmic serine endoprotease	4763752.0
1	1					769	sim8	3489995	819	sim8	61	IS30_IS30	3489995	3491215.0	NC_000913.3_art_ISs	3489494.0	3489994.0		3491216.0	3491716.0	NC_000913.3	3406466.0				3407467.0	IS only present in query Strain.	1. DLIS	Complete IS hit.	-	Intergenic/Pseudo/Repeaed Region	b3257	DUF997 domain-containing protein YhdT	b3256	biotin carboxylase	b3257	DUF997 domain-containing protein YhdT	4763752.0
1	1					772	sim8	3539848	820	sim8	62	IS30_IS30	3539848	3541068.0	NC_000913.3_art_ISs	3539347.0	3539847.0		3541069.0	3541569.0	NC_000913.3	3452656.0				3453657.0	IS only present in query Strain.	1. DLIS	Complete IS hit.	b3320	50S ribosomal subunit protein L3	b3322	putative general secretion pathway protein B	b3320	50S ribosomal subunit protein L3	b3322	putative general secretion pathway protein B	4763752.0
1	1					773	sim8	3562267	821	sim8	63	IS30_IS30	3562267	3563487.0	NC_000913.3_art_ISs	3561766.0	3562266.0		3563488.0	3563988.0	NC_000913.3	3473854.0				3474855.0	IS only present in query Strain.	1. DLIS	Complete IS hit.	b3341	30S ribosomal subunit protein S7	b3343	sulfurtransferase complex subunit TusB	b3341	30S ribosomal subunit protein S7	b3343	sulfurtransferase complex subunit TusB	4763752.0
1	1					774	sim8	3810973	822	sim8	64	IS30_IS30	3810973	3812193.0	NC_000913.3_art_ISs	3810472.0	3810972.0		3812194.0	3812694.0	NC_000913.3	3721339.0				3722340.0	IS only present in query Strain.	1. DLIS	Complete IS hit.	-	Intergenic/Pseudo/Repeaed Region	b3559	glycine--tRNA ligase subunit beta	b3558	IS150 conserved protein InsB	b3559	glycine--tRNA ligase subunit beta	4763752.0
1	1					775	sim8	3847239	823	sim8	65	IS30_IS30	3847239	3848459.0	NC_000913.3_art_ISs	3846738.0	3847238.0		3848460.0	3848960.0	NC_000913.3	3756384.0				3757385.0	IS only present in query Strain.	1. DLIS	Complete IS hit.	b3588	aldehyde dehydrogenase B	-	Intergenic/Pseudo/Repeaed Region	b3588	aldehyde dehydrogenase B	b3589	L-threonine dehydrogenase	4763752.0
1	1					776	sim8	3863581	824	sim8	66	IS30_IS30	3863581	3864801.0	NC_000913.3_art_ISs	3863080.0	3863580.0		3864802.0	3865302.0	NC_000913.3	3771505.0				3772506.0	IS only present in query Strain.	1. DLIS	Complete IS hit.	b3598	DUF3302 domain-containing protein YibI	b3599	mannitol-specific PTS enzyme IICBA component	b3598	DUF3302 domain-containing protein YibI	b3599	mannitol-specific PTS enzyme IICBA component	4763752.0
1	1					777	sim8	3875064	825	sim8	67	IS30_IS30	3875064	3876284.0	NC_000913.3_art_ISs	3874563.0	3875063.0		3876285.0	3876785.0	NC_000913.3	3781767.0				3782768.0	IS only present in query Strain.	1. DLIS	Complete IS hit.	-	Intergenic/Pseudo/Repeaed Region	b3608	glycerol-3-phosphate dehydrogenase	b3607	serine acetyltransferase	b3608	glycerol-3-phosphate dehydrogenase	4763752.0
1	1					778	sim8	3901408	826	sim8	68	IS30_IS30	3901408	3902628.0	NC_000913.3_art_ISs	3900907.0	3901407.0		3902629.0	3903129.0	NC_000913.3	3806890.0				3807891.0	IS only present in query Strain.	1. DLIS	Complete IS hit.	b3631	lipopolysaccharide glucosyltransferase I	-	Intergenic/Pseudo/Repeaed Region	b3631	lipopolysaccharide glucosyltransferase I	b3632	lipopolysaccharide core heptosyltransferase 3	4763752.0
1	1					779	sim8	3905865	827	sim8	69	IS30_IS30	3905865	3907085.0	NC_000913.3_art_ISs	3905364.0	3905864.0		3907086.0	3907586.0	NC_000913.3	3810126.0				3811127.0	IS only present in query Strain.	1. DLIS	Complete IS hit.	b3634	pantetheine-phosphate adenylyltransferase	-	Intergenic/Pseudo/Repeaed Region	b3634	pantetheine-phosphate adenylyltransferase	b3635	DNA-formamidopyrimidine glycosylase	4763752.0
1	1					780	sim8	3953173	828	sim8	70	IS30_IS30	3953173	3954393.0	NC_000913.3_art_ISs	3952672.0	3953172.0		3954394.0	3954894.0	NC_000913.3	3856213.0				3857214.0	IS only present in query Strain.	1. DLIS	Complete IS hit.	b3676	conserved inner membrane protein YidH	b3678	putative sulfatase/phosphatase	b3676	conserved inner membrane protein YidH	b3678	putative sulfatase/phosphatase	4763752.0
1	1					781	sim8	4012531	829	sim8	71	IS30_IS30	4012531	4013751.0	NC_000913.3_art_ISs	4012030.0	4012530.0		4013752.0	4014252.0	NC_000913.3	3914350.0				3915351.0	IS only present in query Strain.	1. DLIS	Complete IS hit.	-	Intergenic/Pseudo/Repeaed Region	-	Intergenic/Pseudo/Repeaed Region	b3730	fused N-acetylglucosamine-1-phosphate uridyltransferase and glucosamine-1-phosphate acetyltransferase	-	Intergenic/Pseudo/Repeaed Region	4763752.0
1	1					782	sim8	4028789	830	sim8	72	IS30_IS30	4028789	4030009.0	NC_000913.3_art_ISs	4028288.0	4028788.0		4030010.0	4030510.0	NC_000913.3	3929387.0				3930388.0	IS only present in query Strain.	1. DLIS	Complete IS hit.	b3745	protein ViaA	-	Intergenic/Pseudo/Repeaed Region	b3745	protein ViaA	b3746	regulatory ATPase RavA	4763752.0
1	1					783	sim8	4102022	831	sim8	73	IS30_IS30	4102022	4103242.0	NC_000913.3_art_ISs	4101521.0	4102021.0		4103243.0	4103743.0	NC_000913.3	4001399.0				4002400.0	IS only present in query Strain.	1. DLIS	Complete IS hit.	-	Intergenic/Pseudo/Repeaed Region	-	Intergenic/Pseudo/Repeaed Region	-	Intergenic/Pseudo/Repeaed Region	-	Intergenic/Pseudo/Repeaed Region	4763752.0
1	1					784	sim8	4233912	832	sim8	74	IS30_IS30	4233912	4235132.0	NC_000913.3_art_ISs	4233411.0	4233911.0		4235133.0	4235633.0	NC_000913.3	4132068.0				4133069.0	IS only present in query Strain.	1. DLIS	Complete IS hit.	b3940	fused aspartate kinase/homoserine dehydrogenase 2	b3941	5;10-methylenetetrahydrofolate reductase	b3940	fused aspartate kinase/homoserine dehydrogenase 2	b3941	5;10-methylenetetrahydrofolate reductase	4763752.0
1	1					785	sim8	4248522	833	sim8	75	IS30_IS30	4248522	4249742.0	NC_000913.3_art_ISs	4248021.0	4248521.0		4249743.0	4250243.0	NC_000913.3	4145457.0				4146458.0	IS only present in query Strain.	1. DLIS	Complete IS hit.	-	Intergenic/Pseudo/Repeaed Region	b3952	putative pyruvate formate-lyase 2 activating enzyme PflC	b3951	putative formate acetyltransferase 2	b3952	putative pyruvate formate-lyase 2 activating enzyme PflC	4763752.0
1	1					786	sim8	4263470	834	sim8	76	IS30_IS30	4263470	4264690.0	NC_000913.3_art_ISs	4262969.0	4263469.0		4264691.0	4265191.0	NC_000913.3	4159184.0				4160185.0	IS only present in query Strain.	1. DLIS	Complete IS hit.	b3961	DNA-binding transcriptional dual regulator OxyR	-	Intergenic/Pseudo/Repeaed Region	b3961	DNA-binding transcriptional dual regulator OxyR	b3962	soluble pyridine nucleotide transhydrogenase	4763752.0
1	1					787	sim8	4301931	835	sim8	77	IS30_IS30	4301931	4303151.0	NC_000913.3_art_ISs	4301430.0	4301930.0		4303152.0	4303652.0	NC_000913.3	4196424.0				4197425.0	IS only present in query Strain.	1. DLIS	Complete IS hit.	b3995	regulator of sigma D	-	Intergenic/Pseudo/Repeaed Region	b3995	regulator of sigma D	b3996	NADH pyrophosphatase	4763752.0
1	1					788	sim8	4330769	836	sim8	78	IS30_IS30	4330769	4331989.0	NC_000913.3_art_ISs	4330268.0	4330768.0		4331990.0	4332490.0	NC_000913.3	4224041.0				4225042.0	IS only present in query Strain.	1. DLIS	Complete IS hit.	-	Intergenic/Pseudo/Repeaed Region	-	Intergenic/Pseudo/Repeaed Region	b4019	cobalamin-dependent methionine synthase	b4019	cobalamin-dependent methionine synthase	4763752.0
1	1					789	sim8	4384322	837	sim8	79	IS30_IS30	4384322	4385542.0	NC_000913.3_art_ISs	4383821.0	4384321.0		4385543.0	4386043.0	NC_000913.3	4276373.0				4277374.0	IS only present in query Strain.	1. DLIS	Complete IS hit.	-	Intergenic/Pseudo/Repeaed Region	b4062	DNA-binding transcriptional dual regulator SoxS	b4061	c-di-GMP phosphodiesterase PdeC	b4062	DNA-binding transcriptional dual regulator SoxS	4763752.0
1	1					790	sim8	4460617	838	sim8	80	IS30_IS30	4460617	4461837.0	NC_000913.3_art_ISs	4460116.0	4460616.0		4461838.0	4462338.0	NC_000913.3	4351447.0				4352448.0	IS only present in query Strain.	1. DLIS	Complete IS hit.	b4125	sensory histidine kinase DcuS	-	Intergenic/Pseudo/Repeaed Region	b4125	sensory histidine kinase DcuS	-	Intergenic/Pseudo/Repeaed Region	4763752.0
1	1					791	sim8	4467743	839	sim8	81	IS30_IS30	4467743	4468963.0	NC_000913.3_art_ISs	4467242.0	4467742.0		4468964.0	4469464.0	NC_000913.3	4357352.0				4358353.0	IS only present in query Strain.	1. DLIS	Complete IS hit.	-	Intergenic/Pseudo/Repeaed Region	-	Intergenic/Pseudo/Repeaed Region	b4131	lysine decarboxylase 1	b4131	lysine decarboxylase 1	4763752.0
1	1					792	sim8	4491303	840	sim8	82	IS30_IS30	4491303	4492523.0	NC_000913.3_art_ISs	4490802.0	4491302.0		4492524.0	4493024.0	NC_000913.3	4379691.0				4380692.0	IS only present in query Strain.	1. DLIS	Complete IS hit.	b4152	fumarate reductase membrane protein FrdC	b4154	fumarate reductase flavoprotein subunit	b4152	fumarate reductase membrane protein FrdC	b4154	fumarate reductase flavoprotein subunit	4763752.0
1	1					793	sim8	4500933	841	sim8	83	IS30_IS30	4500933	4502153.0	NC_000913.3_art_ISs	4500432.0	4500932.0		4502154.0	4502654.0	NC_000913.3	4388100.0				4389101.0	IS only present in query Strain.	1. DLIS	Complete IS hit.	-	Intergenic/Pseudo/Repeaed Region	-	Intergenic/Pseudo/Repeaed Region	b4159	miniconductance mechanosensitive channel MscM	b4159	miniconductance mechanosensitive channel MscM	4763752.0
1	1					794	sim8	4521939	842	sim8	84	IS30_IS30	4521939	4523159.0	NC_000913.3_art_ISs	4521438.0	4521938.0		4523160.0	4523660.0	NC_000913.3	4407885.0				4408886.0	IS only present in query Strain.	1. DLIS	Complete IS hit.	-	Intergenic/Pseudo/Repeaed Region	-	Intergenic/Pseudo/Repeaed Region	b4179	RNase R	b4179	RNase R	4763752.0
1	1					795	sim8	4531180	843	sim8	85	IS30_IS30	4531180	4532400.0	NC_000913.3_art_ISs	4530679.0	4531179.0		4532401.0	4532901.0	NC_000913.3	4415905.0				4416906.0	IS only present in query Strain.	1. DLIS	Complete IS hit.	-	Intergenic/Pseudo/Repeaed Region	-	Intergenic/Pseudo/Repeaed Region	-	Intergenic/Pseudo/Repeaed Region	-	Intergenic/Pseudo/Repeaed Region	4763752.0
1	1					796	sim8	4533951	844	sim8	86	IS30_IS30	4533951	4535171.0	NC_000913.3_art_ISs	4533450.0	4533950.0		4535172.0	4535672.0	NC_000913.3	4417455.0				4418456.0	IS only present in query Strain.	1. DLIS	Complete IS hit.	b4190	carboxylesterase	-	Intergenic/Pseudo/Repeaed Region	b4190	carboxylesterase	-	Intergenic/Pseudo/Repeaed Region	4763752.0
1	1					797	sim8	4538104	845	sim8	87	IS30_IS30	4538104	4539324.0	NC_000913.3_art_ISs	4537603.0	4538103.0		4539325.0	4539825.0	NC_000913.3	4420387.0				4421388.0	IS only present in query Strain.	1. DLIS	Complete IS hit.	-	Intergenic/Pseudo/Repeaed Region	-	Intergenic/Pseudo/Repeaed Region	b4193	L-ascorbate specific PTS enzyme IIC component	-	Intergenic/Pseudo/Repeaed Region	4763752.0
1	1					798	sim8	4570817	846	sim8	88	IS30_IS30	4570817	4572037.0	NC_000913.3_art_ISs	4570316.0	4570816.0		4572038.0	4572538.0	NC_000913.3	4451879.0				4452880.0	IS only present in query Strain.	1. DLIS	Complete IS hit.	-	Intergenic/Pseudo/Repeaed Region	b4230	galactofuranose ABC transporter putative membrane subunit YtfT	b4485	galactofuranose ABC transporter putative ATP binding subunit	b4230	galactofuranose ABC transporter putative membrane subunit YtfT	4763752.0
1	1					799	sim8	4585246	847	sim8	89	IS30_IS30	4585246	4586466.0	NC_000913.3_art_ISs	4584745.0	4585245.0		4586467.0	4586967.0	NC_000913.3	4465087.0				4466088.0	IS only present in query Strain.	1. DLIS	Complete IS hit.	-	Intergenic/Pseudo/Repeaed Region	-	Intergenic/Pseudo/Repeaed Region	b4240	trehalose-specific PTS enzyme IIBC component	b4240	trehalose-specific PTS enzyme IIBC component	4763752.0
1	1					800	sim8	4604727	848	sim8	90	IS30_IS30	4604727	4605947.0	NC_000913.3_art_ISs	4604226.0	4604726.0		4605948.0	4606448.0	NC_000913.3	4483347.0				4484348.0	IS only present in query Strain.	1. DLIS	Complete IS hit.	b4258	valine--tRNA ligase	-	Intergenic/Pseudo/Repeaed Region	b4258	valine--tRNA ligase	-	Intergenic/Pseudo/Repeaed Region	4763752.0
1	1					801	sim9	5404	866	sim9	0	IS30_IS30	5404	6624.0	NC_000913.3_art_ISs	4903.0	5403.0		6625.0	7125.0	NC_000913.3	4903.0				5904.0	IS only present in query Strain.	1. DLIS	Complete IS hit.	b0004	threonine synthase	b0006	peroxide stress resistance protein YaaA	b0004	threonine synthase	b0006	peroxide stress resistance protein YaaA	4763752.0
1	1					802	sim9	103445	867	sim9	1	IS30_IS30	103445	104665.0	NC_000913.3_art_ISs	102944.0	103444.0		104666.0	105166.0	NC_000913.3	101723.0				102724.0	IS only present in query Strain.	1. DLIS	Complete IS hit.	-	Intergenic/Pseudo/Repeaed Region	b0092	D-alanine--D-alanine ligase B	b0091	UDP-N-acetylmuramate--L-alanine ligase	b0092	D-alanine--D-alanine ligase B	4763752.0
1	1					803	sim9	164735	868	sim9	2	IS30_IS30	164735	165955.0	NC_000913.3_art_ISs	164234.0	164734.0		165956.0	166456.0	NC_000913.3	161792.0				162793.0	IS only present in query Strain.	1. DLIS	Complete IS hit.	b0147	RNA 2';3'-cyclic phosphodiesterase	-	Intergenic/Pseudo/Repeaed Region	b0147	RNA 2';3'-cyclic phosphodiesterase	b0148	putative ATP-dependent RNA helicase HrpB	4763752.0
1	1					804	sim9	197697	869	sim9	3	IS30_IS30	197697	198917.0	NC_000913.3_art_ISs	197196.0	197696.0		198918.0	199418.0	NC_000913.3	193533.0				194534.0	IS only present in query Strain.	1. DLIS	Complete IS hit.	-	Intergenic/Pseudo/Repeaed Region	-	Intergenic/Pseudo/Repeaed Region	b0173	1-deoxy-D-xylulose 5-phosphate reductoisomerase	b0173	1-deoxy-D-xylulose 5-phosphate reductoisomerase	4763752.0
1	1					805	sim9	214644	870	sim9	4	IS30_IS30	214644	215864.0	NC_000913.3_art_ISs	214143.0	214643.0		215865.0	216365.0	NC_000913.3	209259.0				210260.0	IS only present in query Strain.	1. DLIS	Complete IS hit.	b0185	acetyl-CoA carboxyltransferase subunit alpha	-	Intergenic/Pseudo/Repeaed Region	b0185	acetyl-CoA carboxyltransferase subunit alpha	b0186	lysine decarboxylase 2	4763752.0
1	1					807	sim9	296782	871	sim9	5	IS30_IS30	296782	298002.0	NC_000913.3_art_ISs	296281.0	296781.0		298003.0	298503.0	NC_000913.3	288955.0				289956.0	IS only present in query Strain.	1. DLIS	Complete IS hit.	b0272	CP4-6 prophage; DNA-binding transcriptional repressor XynR	-	Intergenic/Pseudo/Repeaed Region	b0272	CP4-6 prophage; DNA-binding transcriptional repressor XynR	b0273	CP4-6 prophage; ornithine carbamoyltransferase ArgF	4763752.0
1	1					808	sim9	382680	872	sim9	6	IS30_IS30	382680	383900.0	NC_000913.3_art_ISs	382179.0	382679.0		383901.0	384401.0	NC_000913.3	373632.0				374633.0	IS only present in query Strain.	1. DLIS	Complete IS hit.	b0351	acetaldehyde dehydrogenase (acylating)	-	Intergenic/Pseudo/Repeaed Region	b0351	acetaldehyde dehydrogenase (acylating)	b0352	4-hydroxy-2-oxovalerate aldolase	4763752.0
1	1					809	sim9	463776	873	sim9	7	IS30_IS30	463776	464996.0	NC_000913.3_art_ISs	463275.0	463775.0		464997.0	465497.0	NC_000913.3	453507.0				454508.0	IS only present in query Strain.	1. DLIS	Complete IS hit.	b0433	muropeptide:H(+) symporter	b0435	DNA-binding transcriptional dual regulator BolA	b0433	muropeptide:H(+) symporter	b0435	DNA-binding transcriptional dual regulator BolA	4763752.0
1	1					810	sim9	487728	874	sim9	8	IS30_IS30	487728	488948.0	NC_000913.3_art_ISs	487227.0	487727.0		488949.0	489449.0	NC_000913.3	476238.0				477239.0	IS only present in query Strain.	1. DLIS	Complete IS hit.	b0454	DNA base-flipping protein	b0457	c-di-GMP phosphodiesterase PdeB	b0454	DNA base-flipping protein	b0457	c-di-GMP phosphodiesterase PdeB	4763752.0
1	1					811	sim9	537965	875	sim9	9	IS30_IS30	537965	539185.0	NC_000913.3_art_ISs	537464.0	537964.0		539186.0	539686.0	NC_000913.3	525254.0				526255.0	IS only present in query Strain.	1. DLIS	Complete IS hit.	-	Intergenic/Pseudo/Repeaed Region	-	Intergenic/Pseudo/Repeaed Region	b0497	protein RhsD	b0497	protein RhsD	4763752.0
1	1					812	sim9	566015	876	sim9	10	IS30_IS30	566015	567235.0	NC_000913.3_art_ISs	565514.0	566014.0		567236.0	567736.0	NC_000913.3	552083.0				553084.0	IS only present in query Strain.	1. DLIS	Complete IS hit.	-	Intergenic/Pseudo/Repeaed Region	b0523	N(5)-carboxyaminoimidazole ribonucleotide mutase	b0522	5-(carboxyamino)imidazole ribonucleotide synthase	b0523	N(5)-carboxyaminoimidazole ribonucleotide mutase	4763752.0
1	1					815	sim9	754397	877	sim9	11	IS30_IS30	754397	755617.0	NC_000913.3_art_ISs	753896.0	754396.0		755618.0	756118.0	NC_000913.3	736802.0				737803.0	IS only present in query Strain.	1. DLIS	Complete IS hit.	-	Intergenic/Pseudo/Repeaed Region	-	Intergenic/Pseudo/Repeaed Region	-	Intergenic/Pseudo/Repeaed Region	b0705	putative transposase YbfL	4763752.0
1	1					816	sim9	777334	878	sim9	12	IS30_IS30	777334	778554.0	NC_000913.3_art_ISs	776833.0	777333.0		778555.0	779055.0	NC_000913.3	758518.0				759519.0	IS only present in query Strain.	1. DLIS	Complete IS hit.	-	Intergenic/Pseudo/Repeaed Region	-	Intergenic/Pseudo/Repeaed Region	-	Intergenic/Pseudo/Repeaed Region	b0726	subunit of E1(0) component of 2-oxoglutarate dehydrogenase	4763752.0
1	1					817	sim9	821761	879	sim9	13	IS30_IS30	821761	822981.0	NC_000913.3_art_ISs	821260.0	821760.0		822982.0	823482.0	NC_000913.3	801724.0				802725.0	IS only present in query Strain.	1. DLIS	Complete IS hit.	b0769	putative isomerase YbhH	-	Intergenic/Pseudo/Repeaed Region	b0769	putative isomerase YbhH	b0770	putative tricarboxylate transporter	4763752.0
1	1					818	sim9	824109	880	sim9	14	IS30_IS30	824109	825329.0	NC_000913.3_art_ISs	823608.0	824108.0		825330.0	825830.0	NC_000913.3	802851.0				803852.0	IS only present in query Strain.	1. DLIS	Complete IS hit.	-	Intergenic/Pseudo/Repeaed Region	b0771	putative hydratase YbhJ	b0770	putative tricarboxylate transporter	b0771	putative hydratase YbhJ	4763752.0
1	1					819	sim9	827914	881	sim9	15	IS30_IS30	827914	829134.0	NC_000913.3_art_ISs	827413.0	827913.0		829135.0	829635.0	NC_000913.3	805435.0				806436.0	IS only present in query Strain.	1. DLIS	Complete IS hit.	b0771	putative hydratase YbhJ	b0772	outer membrane lipoprotein YhbC	b0771	putative hydratase YbhJ	b0772	outer membrane lipoprotein YhbC	4763752.0
1	1					820	sim9	942173	882	sim9	16	IS30_IS30	942173	943393.0	NC_000913.3_art_ISs	941672.0	942172.0		943394.0	943894.0	NC_000913.3	918473.0				919474.0	IS only present in query Strain.	1. DLIS	Complete IS hit.	-	Intergenic/Pseudo/Repeaed Region	b0878	ABC-type tripartite efflux pump membrane fusion protein	b0877	DUF535 domain-containing protein YbjX	b0878	ABC-type tripartite efflux pump membrane fusion protein	4763752.0
1	1					821	sim9	990784	883	sim9	17	IS30_IS30	990784	992004.0	NC_000913.3_art_ISs	990283.0	990783.0		992005.0	992505.0	NC_000913.3	965863.0				966864.0	IS only present in query Strain.	1. DLIS	Complete IS hit.	-	Intergenic/Pseudo/Repeaed Region	b0914	ATP-binding lipopolysaccharide transport protein	b0913	conserved inner membrane protein YcaI	b0914	ATP-binding lipopolysaccharide transport protein	4763752.0
1	1					824	sim9	1181937	884	sim9	18	IS30_IS30	1181937	1183157.0	NC_000913.3_art_ISs	1181436.0	1181936.0		1183158.0	1183658.0	NC_000913.3	1153353.0				1154354.0	IS only present in query Strain.	1. DLIS	Complete IS hit.	-	Intergenic/Pseudo/Repeaed Region	b1097	endolytic murein transglycosylase	b1096	aminodeoxychorismate lyase	b1097	endolytic murein transglycosylase	4763752.0
1	1					825	sim9	1213364	885	sim9	19	IS30_IS30	1213364	1214584.0	NC_000913.3_art_ISs	1212863.0	1213363.0		1214585.0	1215085.0	NC_000913.3	1183559.0				1184560.0	IS only present in query Strain.	1. DLIS	Complete IS hit.	b1124	spermidine preferential ABC transporter membrane subunit PotC	b1126	spermidine preferential ABC transporter ATP binding subunit	b1124	spermidine preferential ABC transporter membrane subunit PotC	b1126	spermidine preferential ABC transporter ATP binding subunit	4763752.0
1	1					826	sim9	1273376	886	sim9	20	IS30_IS30	1273376	1274596.0	NC_000913.3_art_ISs	1272875.0	1273375.0		1274597.0	1275097.0	NC_000913.3	1242350.0				1243351.0	IS only present in query Strain.	1. DLIS	Complete IS hit.	-	Intergenic/Pseudo/Repeaed Region	b1193	lytic murein transglycosylase E	b1192	murein L;D-carboxypeptidase	b1193	lytic murein transglycosylase E	4763752.0
1	1					827	sim9	1285255	887	sim9	21	IS30_IS30	1285255	1286475.0	NC_000913.3_art_ISs	1284754.0	1285254.0		1286476.0	1286976.0	NC_000913.3	1253008.0				1254009.0	IS only present in query Strain.	1. DLIS	Complete IS hit.	-	Intergenic/Pseudo/Repeaed Region	-	Intergenic/Pseudo/Repeaed Region	-	Intergenic/Pseudo/Repeaed Region	b1202	putative autotransporter adhesin YcgV	4763752.0
1	1					828	sim9	1310952	888	sim9	22	IS30_IS30	1310952	1312172.0	NC_000913.3_art_ISs	1310451.0	1310951.0		1312173.0	1312673.0	NC_000913.3	1277484.0				1278485.0	IS only present in query Strain.	1. DLIS	Complete IS hit.	b1222	sensory histidine kinase NarX	-	Intergenic/Pseudo/Repeaed Region	b1222	sensory histidine kinase NarX	b1223	nitrate:nitrite antiporter NarK	4763752.0
1	1					829	sim9	1338038	889	sim9	23	IS30_IS30	1338038	1339258.0	NC_000913.3_art_ISs	1337537.0	1338037.0		1339259.0	1339759.0	NC_000913.3	1303349.0				1304350.0	IS only present in query Strain.	1. DLIS	Complete IS hit.	b1244	murein tripeptide ABC transporter/oligopeptide ABC transporter inner membrane subunit OppB	-	Intergenic/Pseudo/Repeaed Region	b1244	murein tripeptide ABC transporter/oligopeptide ABC transporter inner membrane subunit OppB	b1245	murein tripeptide ABC transporter/oligopeptide ABC transporter inner membrane subunit OppC	4763752.0
1	1					830	sim9	1423120	890	sim9	24	IS30_IS30	1423120	1424340.0	NC_000913.3_art_ISs	1422619.0	1423119.0		1424341.0	1424841.0	NC_000913.3	1387210.0				1388211.0	IS only present in query Strain.	1. DLIS	Complete IS hit.	-	Intergenic/Pseudo/Repeaed Region	-	Intergenic/Pseudo/Repeaed Region	b1323	DNA-binding transcriptional dual regulator TyrR	b1323	DNA-binding transcriptional dual regulator TyrR	4763752.0
1	1					831	sim9	1461466	891	sim9	25	IS30_IS30	1461466	1462686.0	NC_000913.3_art_ISs	1460965.0	1461465.0		1462687.0	1463187.0	NC_000913.3	1424335.0				1425336.0	IS only present in query Strain.	1. DLIS	Complete IS hit.	-	Intergenic/Pseudo/Repeaed Region	-	Intergenic/Pseudo/Repeaed Region	b1363	Rac prophage; K(+) transporter TrkG	-	Intergenic/Pseudo/Repeaed Region	4763752.0
1	1					832	sim9	1572742	892	sim9	26	IS30_IS30	1572742	1573962.0	NC_000913.3_art_ISs	1572241.0	1572741.0		1573963.0	1574463.0	NC_000913.3	1534390.0				1535391.0	IS only present in query Strain.	1. DLIS	Complete IS hit.	b1463	arylamine N-acetyltransferase	b1464	PF02567 family protein YddE	b1463	arylamine N-acetyltransferase	b1464	PF02567 family protein YddE	4763752.0
1	1					833	sim9	1624191	893	sim9	27	IS30_IS30	1624191	1625411.0	NC_000913.3_art_ISs	1623690.0	1624190.0		1625412.0	1625912.0	NC_000913.3	1584618.0				1585619.0	IS only present in query Strain.	1. DLIS	Complete IS hit.	-	Intergenic/Pseudo/Repeaed Region	-	Intergenic/Pseudo/Repeaed Region	b1501	putative oxidoreductase YdeP	b1501	putative oxidoreductase YdeP	4763752.0
1	1					834	sim9	1685635	894	sim9	28	IS30_IS30	1685635	1686855.0	NC_000913.3_art_ISs	1685134.0	1685634.0		1686856.0	1687356.0	NC_000913.3	1644841.0				1645842.0	IS only present in query Strain.	1. DLIS	Complete IS hit.	b1561	Qin prophage; protein Rem	b1564	Qin prophage; antitoxin/DNA-binding transcriptional repressor RelB	b1561	Qin prophage; protein Rem	b1564	Qin prophage; antitoxin/DNA-binding transcriptional repressor RelB	4763752.0
1	1					835	sim9	1743444	895	sim9	29	IS30_IS30	1743444	1744664.0	NC_000913.3_art_ISs	1742943.0	1743443.0		1744665.0	1745165.0	NC_000913.3	1701429.0				1702430.0	IS only present in query Strain.	1. DLIS	Complete IS hit.	-	Intergenic/Pseudo/Repeaed Region	b1623	adenosine deaminase	b1622	negative regulator of MalT activity/cystathionine beta-lyase	b1623	adenosine deaminase	4763752.0
1	1					836	sim9	1773246	896	sim9	30	IS30_IS30	1773246	1774466.0	NC_000913.3_art_ISs	1772745.0	1773245.0		1774467.0	1774967.0	NC_000913.3	1730010.0				1731011.0	IS only present in query Strain.	1. DLIS	Complete IS hit.	-	Intergenic/Pseudo/Repeaed Region	-	Intergenic/Pseudo/Repeaed Region	b1653	putative ATP-dependent helicase Lhr	b1653	putative ATP-dependent helicase Lhr	4763752.0
1	1					837	sim9	1775852	897	sim9	31	IS30_IS30	1775852	1777072.0	NC_000913.3_art_ISs	1775351.0	1775851.0		1777073.0	1777573.0	NC_000913.3	1731395.0				1732396.0	IS only present in query Strain.	1. DLIS	Complete IS hit.	-	Intergenic/Pseudo/Repeaed Region	-	Intergenic/Pseudo/Repeaed Region	b1653	putative ATP-dependent helicase Lhr	b1653	putative ATP-dependent helicase Lhr	4763752.0
1	1					838	sim9	1813545	898	sim9	32	IS30_IS30	1813545	1814765.0	NC_000913.3_art_ISs	1813044.0	1813544.0		1814766.0	1815266.0	NC_000913.3	1767867.0				1768868.0	IS only present in query Strain.	1. DLIS	Complete IS hit.	-	Intergenic/Pseudo/Repeaed Region	-	Intergenic/Pseudo/Repeaed Region	b1687	putative FAD-linked oxidoreductase	-	Intergenic/Pseudo/Repeaed Region	4763752.0
1	1					839	sim9	1862116	899	sim9	33	IS30_IS30	1862116	1863336.0	NC_000913.3_art_ISs	1861615.0	1862115.0		1863337.0	1863837.0	NC_000913.3	1815217.0				1816218.0	IS only present in query Strain.	1. DLIS	Complete IS hit.	-	Intergenic/Pseudo/Repeaed Region	-	Intergenic/Pseudo/Repeaed Region	b1732	catalase II	-	Intergenic/Pseudo/Repeaed Region	4763752.0
1	1					840	sim9	1909761	900	sim9	34	IS30_IS30	1909761	1910981.0	NC_000913.3_art_ISs	1909260.0	1909760.0		1910982.0	1911482.0	NC_000913.3	1861641.0				1862642.0	IS only present in query Strain.	1. DLIS	Complete IS hit.	-	Intergenic/Pseudo/Repeaed Region	-	Intergenic/Pseudo/Repeaed Region	-	Intergenic/Pseudo/Repeaed Region	-	Intergenic/Pseudo/Repeaed Region	4763752.0
1	1					841	sim9	1915791	901	sim9	35	IS30_IS30	1915791	1917011.0	NC_000913.3_art_ISs	1915290.0	1915790.0		1917012.0	1917512.0	NC_000913.3	1866450.0				1867451.0	IS only present in query Strain.	1. DLIS	Complete IS hit.	b1782	scaffolding protein that interacts with murein polymerase and murein hydrolase	-	Intergenic/Pseudo/Repeaed Region	b1782	scaffolding protein that interacts with murein polymerase and murein hydrolase	b1783	protein kinase YeaG	4763752.0
1	1					842	sim9	1927824	902	sim9	36	IS30_IS30	1927824	1929044.0	NC_000913.3_art_ISs	1927323.0	1927823.0		1929045.0	1929545.0	NC_000913.3	1877262.0				1878263.0	IS only present in query Strain.	1. DLIS	Complete IS hit.	-	Intergenic/Pseudo/Repeaed Region	-	Intergenic/Pseudo/Repeaed Region	-	Intergenic/Pseudo/Repeaed Region	b1794	diguanylate cyclase DgcP	4763752.0
1	1					843	sim9	1993170	903	sim9	37	IS30_IS30	1993170	1994390.0	NC_000913.3_art_ISs	1992669.0	1993169.0		1994391.0	1994891.0	NC_000913.3	1941387.0				1942388.0	IS only present in query Strain.	1. DLIS	Complete IS hit.	b1856	peptidoglycan DD-endopeptidase MepM	-	Intergenic/Pseudo/Repeaed Region	b1856	peptidoglycan DD-endopeptidase MepM	b1857	Zn(2(+)) ABC transporter periplasmic binding protein	4763752.0
1	1					844	sim9	2058543	904	sim9	38	IS30_IS30	2058543	2059763.0	NC_000913.3_art_ISs	2058042.0	2058542.0		2059764.0	2060264.0	NC_000913.3	2005539.0				2006540.0	IS only present in query Strain.	1. DLIS	Complete IS hit.	b1925	flagellar biosynthesis protein FliS	b1927	alpha-amylase	b1925	flagellar biosynthesis protein FliS	b1927	alpha-amylase	4763752.0
1	1					845	sim9	2094323	905	sim9	39	IS30_IS30	2094323	2095543.0	NC_000913.3_art_ISs	2093822.0	2094322.0		2095544.0	2096044.0	NC_000913.3	2040098.0				2041099.0	IS only present in query Strain.	1. DLIS	Complete IS hit.	b1971	periplasmic protein-L-methionine sulfoxide reductase catalytic subunit	-	Intergenic/Pseudo/Repeaed Region	b1971	periplasmic protein-L-methionine sulfoxide reductase catalytic subunit	b1972	periplasmic protein-L-methionine sulfoxide reductase heme binding subunit	4763752.0
1	1					846	sim9	2170556	906	sim9	40	IS30_IS30	2170556	2171776.0	NC_000913.3_art_ISs	2170055.0	2170555.0		2171777.0	2172277.0	NC_000913.3	2115110.0				2116111.0	IS only present in query Strain.	1. DLIS	Complete IS hit.	-	Intergenic/Pseudo/Repeaed Region	b2044	putative colanic biosynthesis glycosyl transferase	b2043	putative colanic acid biosynthesis protein WcaM	b2044	putative colanic biosynthesis glycosyl transferase	4763752.0
1	1					847	sim9	2201337	907	sim9	41	IS30_IS30	2201337	2202557.0	NC_000913.3_art_ISs	2200836.0	2201336.0		2202558.0	2203058.0	NC_000913.3	2144670.0				2145671.0	IS only present in query Strain.	1. DLIS	Complete IS hit.	-	Intergenic/Pseudo/Repeaed Region	-	Intergenic/Pseudo/Repeaed Region	b2067	putative diguanylate cyclase DgcE	b2067	putative diguanylate cyclase DgcE	4763752.0
1	1					848	sim9	2205067	908	sim9	42	IS30_IS30	2205067	2206287.0	NC_000913.3_art_ISs	2204566.0	2205066.0		2206288.0	2206788.0	NC_000913.3	2147179.0				2148180.0	IS only present in query Strain.	1. DLIS	Complete IS hit.	b2068	DNA-3-methyladenine glycosylase 2	-	Intergenic/Pseudo/Repeaed Region	b2068	DNA-3-methyladenine glycosylase 2	b2069	HSP70 family protein YegD	4763752.0
1	1					849	sim9	2207015	909	sim9	43	IS30_IS30	2207015	2208235.0	NC_000913.3_art_ISs	2206514.0	2207014.0		2208236.0	2208736.0	NC_000913.3	2147906.0				2148907.0	IS only present in query Strain.	1. DLIS	Complete IS hit.	-	Intergenic/Pseudo/Repeaed Region	-	Intergenic/Pseudo/Repeaed Region	b2069	HSP70 family protein YegD	b2069	HSP70 family protein YegD	4763752.0
1	1					850	sim9	2394121	910	sim9	44	IS30_IS30	2394121	2395341.0	NC_000913.3_art_ISs	2393620.0	2394120.0		2395342.0	2395842.0	NC_000913.3	2333791.0				2334792.0	IS only present in query Strain.	1. DLIS	Complete IS hit.	-	Intergenic/Pseudo/Repeaed Region	b2229	DUF1175 domain-containing protein YfaT	b4500	putative macroglobulin family protein; N-terminal fragment	b2229	DUF1175 domain-containing protein YfaT	4763752.0
1	1					851	sim9	2437074	911	sim9	45	IS30_IS30	2437074	2438294.0	NC_000913.3_art_ISs	2436573.0	2437073.0		2438295.0	2438795.0	NC_000913.3	2375523.0				2376524.0	IS only present in query Strain.	1. DLIS	Complete IS hit.	b2261	o-succinylbenzoate synthase	-	Intergenic/Pseudo/Repeaed Region	b2261	o-succinylbenzoate synthase	b2262	1;4-dihydroxy-2-naphthoyl-CoA synthase	4763752.0
1	1					854	sim9	2555105	912	sim9	46	IS30_IS30	2555105	2556325.0	NC_000913.3_art_ISs	2554604.0	2555104.0		2556326.0	2556826.0	NC_000913.3	2489891.0				2490892.0	IS only present in query Strain.	1. DLIS	Complete IS hit.	b2372	putative transport protein YfdV	-	Intergenic/Pseudo/Repeaed Region	b2372	putative transport protein YfdV	b2373	oxalyl-CoA decarboxylase	4763752.0
1	1					855	sim9	2560860	913	sim9	47	IS30_IS30	2560860	2562080.0	NC_000913.3_art_ISs	2560359.0	2560859.0		2562081.0	2562581.0	NC_000913.3	2494425.0				2495426.0	IS only present in query Strain.	1. DLIS	Complete IS hit.	-	Intergenic/Pseudo/Repeaed Region	-	Intergenic/Pseudo/Repeaed Region	-	Intergenic/Pseudo/Repeaed Region	-	Intergenic/Pseudo/Repeaed Region	4763752.0
1	1					856	sim9	2566817	914	sim9	48	IS30_IS30	2566817	2568037.0	NC_000913.3_art_ISs	2566316.0	2566816.0		2568038.0	2568538.0	NC_000913.3	2499161.0				2500162.0	IS only present in query Strain.	1. DLIS	Complete IS hit.	-	Intergenic/Pseudo/Repeaed Region	-	Intergenic/Pseudo/Repeaed Region	b2380	sensory histidine kinase YpdA	b2380	sensory histidine kinase YpdA	4763752.0
1	1					857	sim9	2600141	915	sim9	49	IS30_IS30	2600141	2601361.0	NC_000913.3_art_ISs	2599640.0	2600140.0		2601362.0	2601862.0	NC_000913.3	2531264.0				2532265.0	IS only present in query Strain.	1. DLIS	Complete IS hit.	-	Intergenic/Pseudo/Repeaed Region	-	Intergenic/Pseudo/Repeaed Region	-	Intergenic/Pseudo/Repeaed Region	-	Intergenic/Pseudo/Repeaed Region	4763752.0
1	1					858	sim9	2603845	916	sim9	50	IS30_IS30	2603845	2605065.0	NC_000913.3_art_ISs	2603344.0	2603844.0		2605066.0	2605566.0	NC_000913.3	2533747.0				2534748.0	IS only present in query Strain.	1. DLIS	Complete IS hit.	-	Intergenic/Pseudo/Repeaed Region	-	Intergenic/Pseudo/Repeaed Region	-	Intergenic/Pseudo/Repeaed Region	b2416	PTS enzyme I	4763752.0
1	1					859	sim9	2634464	917	sim9	51	IS30_IS30	2634464	2635684.0	NC_000913.3_art_ISs	2633963.0	2634463.0		2635685.0	2636185.0	NC_000913.3	2563145.0				2564146.0	IS only present in query Strain.	1. DLIS	Complete IS hit.	-	Intergenic/Pseudo/Repeaed Region	b2449	CPZ-55 prophage; uncharacterized protein YffR	-	Intergenic/Pseudo/Repeaed Region	b2449	CPZ-55 prophage; uncharacterized protein YffR	4763752.0
1	1					860	sim9	2664311	918	sim9	52	IS30_IS30	2664311	2665531.0	NC_000913.3_art_ISs	2663810.0	2664310.0		2665532.0	2666032.0	NC_000913.3	2591771.0				2592772.0	IS only present in query Strain.	1. DLIS	Complete IS hit.	-	Intergenic/Pseudo/Repeaed Region	b4547	UPF0370 protein YpfN	b2472	succinyl-diaminopimelate desuccinylase	b4547	UPF0370 protein YpfN	4763752.0
1	1					861	sim9	2704099	919	sim9	53	IS30_IS30	2704099	2705319.0	NC_000913.3_art_ISs	2703598.0	2704098.0		2705320.0	2705820.0	NC_000913.3	2630338.0				2631339.0	IS only present in query Strain.	1. DLIS	Complete IS hit.	-	Intergenic/Pseudo/Repeaed Region	b2507	GMP synthetase	b2506	nalidixic acid resistance protein YfgI	b2507	GMP synthetase	4763752.0
1	1					862	sim9	2819307	920	sim9	54	IS30_IS30	2819307	2820527.0	NC_000913.3_art_ISs	2818806.0	2819306.0		2820528.0	2821028.0	NC_000913.3	2744325.0				2745326.0	IS only present in query Strain.	1. DLIS	Complete IS hit.	b2606	50S ribosomal subunit protein L19	-	Intergenic/Pseudo/Repeaed Region	b2606	50S ribosomal subunit protein L19	b2607	tRNA m(1)G37 methyltransferase	4763752.0
1	1					863	sim9	2822612	921	sim9	55	IS30_IS30	2822612	2823832.0	NC_000913.3_art_ISs	2822111.0	2822611.0		2823833.0	2824333.0	NC_000913.3	2746409.0				2747410.0	IS only present in query Strain.	1. DLIS	Complete IS hit.	-	Intergenic/Pseudo/Repeaed Region	-	Intergenic/Pseudo/Repeaed Region	-	Intergenic/Pseudo/Repeaed Region	b2610	signal recognition particle protein component	4763752.0
1	1					864	sim9	2931777	922	sim9	56	IS30_IS30	2931777	2932997.0	NC_000913.3_art_ISs	2931276.0	2931776.0		2932998.0	2933498.0	NC_000913.3	2854353.0				2855354.0	IS only present in query Strain.	1. DLIS	Complete IS hit.	-	Intergenic/Pseudo/Repeaed Region	-	Intergenic/Pseudo/Repeaed Region	b2731	DNA-binding transcriptional activator FhlA	b2731	DNA-binding transcriptional activator FhlA	4763752.0
1	1					865	sim9	2935504	923	sim9	57	IS30_IS30	2935504	2936724.0	NC_000913.3_art_ISs	2935003.0	2935503.0		2936725.0	2937225.0	NC_000913.3	2856859.0				2857860.0	IS only present in query Strain.	1. DLIS	Complete IS hit.	-	Intergenic/Pseudo/Repeaed Region	-	Intergenic/Pseudo/Repeaed Region	-	Intergenic/Pseudo/Repeaed Region	b2733	DNA mismatch repair protein MutS	4763752.0
1	1					866	sim9	3134538	924	sim9	58	IS30_IS30	3134538	3135758.0	NC_000913.3_art_ISs	3134037.0	3134537.0		3135759.0	3136259.0	NC_000913.3	3054672.0				3055673.0	IS only present in query Strain.	1. DLIS	Complete IS hit.	b2908	proline aminopeptidase P II	b2910	cell division protein ZapA	b2908	proline aminopeptidase P II	b2910	cell division protein ZapA	4763752.0
1	1					867	sim9	3143865	925	sim9	59	IS30_IS30	3143865	3145085.0	NC_000913.3_art_ISs	3143364.0	3143864.0		3145086.0	3145586.0	NC_000913.3	3062778.0				3063779.0	IS only present in query Strain.	1. DLIS	Complete IS hit.	b2917	methylmalonyl-CoA mutase	-	Intergenic/Pseudo/Repeaed Region	b2917	methylmalonyl-CoA mutase	b2918	methylmalonyl-CoA mutase-interacting GTPase YgfD	4763752.0
1	1					868	sim9	3159671	926	sim9	60	IS30_IS30	3159671	3160891.0	NC_000913.3_art_ISs	3159170.0	3159670.0		3160892.0	3161392.0	NC_000913.3	3077363.0				3078364.0	IS only present in query Strain.	1. DLIS	Complete IS hit.	b4465	putative zinc-binding dehydrogenase YggP	-	Intergenic/Pseudo/Repeaed Region	b4465	putative zinc-binding dehydrogenase YggP	b2933	mannitol-specific PTS enzyme IICB component CmtA	4763752.0
1	1					869	sim9	3171256	927	sim9	61	IS30_IS30	3171256	3172476.0	NC_000913.3_art_ISs	3170755.0	3171255.0		3172477.0	3172977.0	NC_000913.3	3087727.0				3088728.0	IS only present in query Strain.	1. DLIS	Complete IS hit.	b2942	methionine adenosyltransferase	b2943	galactose:H(+) symporter	b2942	methionine adenosyltransferase	b2943	galactose:H(+) symporter	4763752.0
1	1					873	sim9	3218904	928	sim9	62	IS30_IS30	3218904	3220124.0	NC_000913.3_art_ISs	3218403.0	3218903.0		3220125.0	3220625.0	NC_000913.3	3130491.0				3131492.0	IS only present in query Strain.	1. DLIS	Complete IS hit.	-	Intergenic/Pseudo/Repeaed Region	b2983	putative transport protein YghQ	b2982	IS5 transposase and trans-activator	b2983	putative transport protein YghQ	4763752.0
1	1					874	sim9	3405976	929	sim9	63	IS30_IS30	3405976	3407196.0	NC_000913.3_art_ISs	3405475.0	3405975.0		3407197.0	3407697.0	NC_000913.3	3316342.0				3317343.0	IS only present in query Strain.	1. DLIS	Complete IS hit.	-	Intergenic/Pseudo/Repeaed Region	-	Intergenic/Pseudo/Repeaed Region	b3169	transcription termination/antitermination protein NusA	b3169	transcription termination/antitermination protein NusA	4763752.0
1	1					875	sim9	3465328	930	sim9	64	IS30_IS30	3465328	3466548.0	NC_000913.3_art_ISs	3464827.0	3465327.0		3466549.0	3467049.0	NC_000913.3	3374473.0				3375474.0	IS only present in query Strain.	1. DLIS	Complete IS hit.	b3226	DNA-binding transcriptional dual regulator NanR	-	Intergenic/Pseudo/Repeaed Region	b3226	DNA-binding transcriptional dual regulator NanR	b3227	putative transporter DcuD	4763752.0
1	1					876	sim9	3478589	931	sim9	65	IS30_IS30	3478589	3479809.0	NC_000913.3_art_ISs	3478088.0	3478588.0		3479810.0	3480310.0	NC_000913.3	3386513.0				3387514.0	IS only present in query Strain.	1. DLIS	Complete IS hit.	-	Intergenic/Pseudo/Repeaed Region	-	Intergenic/Pseudo/Repeaed Region	b3240	aromatic carboxylic acid efflux pump subunit AaeB	b3240	aromatic carboxylic acid efflux pump subunit AaeB	4763752.0
1	1					877	sim9	3583426	932	sim9	66	IS30_IS30	3583426	3584646.0	NC_000913.3_art_ISs	3582925.0	3583425.0		3584647.0	3585147.0	NC_000913.3	3490129.0				3491130.0	IS only present in query Strain.	1. DLIS	Complete IS hit.	b3359	N-acetylornithine aminotransferase/N-succinyldiaminopimelate aminotransferase	b3361	putative adenosine monophosphate--protein transferase Fic	b3359	N-acetylornithine aminotransferase/N-succinyldiaminopimelate aminotransferase	b3361	putative adenosine monophosphate--protein transferase Fic	4763752.0
1	1					878	sim9	3613800	933	sim9	67	IS30_IS30	3613800	3615020.0	NC_000913.3_art_ISs	3613299.0	3613799.0		3615021.0	3615521.0	NC_000913.3	3519282.0				3520283.0	IS only present in query Strain.	1. DLIS	Complete IS hit.	-	Intergenic/Pseudo/Repeaed Region	-	Intergenic/Pseudo/Repeaed Region	-	Intergenic/Pseudo/Repeaed Region	b3391	DNA utilization protein HofQ	4763752.0
1	1					879	sim9	3684546	934	sim9	68	IS30_IS30	3684546	3685766.0	NC_000913.3_art_ISs	3684045.0	3684545.0		3685767.0	3686267.0	NC_000913.3	3588807.0				3589808.0	IS only present in query Strain.	1. DLIS	Complete IS hit.	b3450	sn-glycerol 3-phosphate ABC transporter ATP binding subunit	-	Intergenic/Pseudo/Repeaed Region	b3450	sn-glycerol 3-phosphate ABC transporter ATP binding subunit	b3451	sn-glycerol 3-phosphate ABC transporter membrane subunit UgpE	4763752.0
1	1					880	sim9	3850818	935	sim9	69	IS30_IS30	3850818	3852038.0	NC_000913.3_art_ISs	3850317.0	3850817.0		3852039.0	3852539.0	NC_000913.3	3753858.0				3754859.0	IS only present in query Strain.	1. DLIS	Complete IS hit.	b3586	putative membrane fusion protein	-	Intergenic/Pseudo/Repeaed Region	b3586	putative membrane fusion protein	-	Intergenic/Pseudo/Repeaed Region	4763752.0
1	1					881	sim9	3892448	936	sim9	70	IS30_IS30	3892448	3893668.0	NC_000913.3_art_ISs	3891947.0	3892447.0		3893669.0	3894169.0	NC_000913.3	3794267.0				3795268.0	IS only present in query Strain.	1. DLIS	Complete IS hit.	-	Intergenic/Pseudo/Repeaed Region	b3620	ADP-heptose--LPS heptosyltransferase 2	b3619	ADP-L-glycero-D-mannoheptose 6-epimerase	b3620	ADP-heptose--LPS heptosyltransferase 2	4763752.0
1	1					882	sim9	3993808	937	sim9	71	IS30_IS30	3993808	3995028.0	NC_000913.3_art_ISs	3993307.0	3993807.0		3995029.0	3995529.0	NC_000913.3	3894406.0				3895407.0	IS only present in query Strain.	1. DLIS	Complete IS hit.	b3712	putative phosphopantetheinyl transferase	b3714	adenine:H(+) symporter	b3712	putative phosphopantetheinyl transferase	b3714	adenine:H(+) symporter	4763752.0
1	1					883	sim9	4043870	938	sim9	72	IS30_IS30	4043870	4045090.0	NC_000913.3_art_ISs	4043369.0	4043869.0		4045091.0	4045591.0	NC_000913.3	3943247.0				3944248.0	IS only present in query Strain.	1. DLIS	Complete IS hit.	-	Intergenic/Pseudo/Repeaed Region	-	Intergenic/Pseudo/Repeaed Region	-	Intergenic/Pseudo/Repeaed Region	-	Intergenic/Pseudo/Repeaed Region	4763752.0
1	1					884	sim9	4049868	939	sim9	73	IS30_IS30	4049868	4051088.0	NC_000913.3_art_ISs	4049367.0	4049867.0		4051089.0	4051589.0	NC_000913.3	3948024.0				3949025.0	IS only present in query Strain.	1. DLIS	Complete IS hit.	-	Intergenic/Pseudo/Repeaed Region	-	Intergenic/Pseudo/Repeaed Region	-	Intergenic/Pseudo/Repeaed Region	b3765	putative magnesium chelatase YifB	4763752.0
1	1					885	sim9	4096097	940	sim9	74	IS30_IS30	4096097	4097317.0	NC_000913.3_art_ISs	4095596.0	4096096.0		4097318.0	4097818.0	NC_000913.3	3993032.0				3994033.0	IS only present in query Strain.	1. DLIS	Complete IS hit.	-	Intergenic/Pseudo/Repeaed Region	b3807	frataxin CyaY	b3806	adenylate cyclase	b3807	frataxin CyaY	4763752.0
1	1					886	sim9	4124610	941	sim9	75	IS30_IS30	4124610	4125830.0	NC_000913.3_art_ISs	4124109.0	4124609.0		4125831.0	4126331.0	NC_000913.3	4020324.0				4021325.0	IS only present in query Strain.	1. DLIS	Complete IS hit.	-	Intergenic/Pseudo/Repeaed Region	-	Intergenic/Pseudo/Repeaed Region	b3835	ubiquinone biosynthesis protein UbiB	b3835	ubiquinone biosynthesis protein UbiB	4763752.0
1	1					887	sim9	4156647	942	sim9	76	IS30_IS30	4156647	4157867.0	NC_000913.3_art_ISs	4156146.0	4156646.0		4157868.0	4158368.0	NC_000913.3	4051140.0				4052141.0	IS only present in query Strain.	1. DLIS	Complete IS hit.	-	Intergenic/Pseudo/Repeaed Region	b3867	coproporphyrinogen III dehydrogenase	-	Intergenic/Pseudo/Repeaed Region	b3867	coproporphyrinogen III dehydrogenase	4763752.0
1	1					888	sim9	4172070	943	sim9	77	IS30_IS30	4172070	4173290.0	NC_000913.3_art_ISs	4171569.0	4172069.0		4173291.0	4173791.0	NC_000913.3	4065342.0				4066343.0	IS only present in query Strain.	1. DLIS	Complete IS hit.	b3876	putative sulfoquinovose transporter	-	Intergenic/Pseudo/Repeaed Region	b3876	putative sulfoquinovose transporter	b3877	putative 2;3-dihydroxypropane-1-sulfonate export protein	4763752.0
1	1					889	sim9	4191995	944	sim9	78	IS30_IS30	4191995	4193215.0	NC_000913.3_art_ISs	4191494.0	4191994.0		4193216.0	4193716.0	NC_000913.3	4084046.0				4085047.0	IS only present in query Strain.	1. DLIS	Complete IS hit.	-	Intergenic/Pseudo/Repeaed Region	-	Intergenic/Pseudo/Repeaed Region	b3894	formate dehydrogenase O subunit alpha	b3894	formate dehydrogenase O subunit alpha	4763752.0
1	1					890	sim9	4207352	945	sim9	79	IS30_IS30	4207352	4208572.0	NC_000913.3_art_ISs	4206851.0	4207351.0		4208573.0	4209073.0	NC_000913.3	4098182.0				4099183.0	IS only present in query Strain.	1. DLIS	Complete IS hit.	b3905	DNA-binding transcriptional activator RhaS	-	Intergenic/Pseudo/Repeaed Region	b3905	DNA-binding transcriptional activator RhaS	b3906	DNA-binding transcriptional activator RhaR	4763752.0
1	1					891	sim9	4211201	946	sim9	80	IS30_IS30	4211201	4212421.0	NC_000913.3_art_ISs	4210700.0	4211200.0		4212422.0	4212922.0	NC_000913.3	4100810.0				4101811.0	IS only present in query Strain.	1. DLIS	Complete IS hit.	-	Intergenic/Pseudo/Repeaed Region	b3909	2-dehydro-3-deoxy-D-gluconate:H(+) symporter	b3908	superoxide dismutase (Mn)	b3909	2-dehydro-3-deoxy-D-gluconate:H(+) symporter	4763752.0
1	1					892	sim9	4233919	947	sim9	81	IS30_IS30	4233919	4235139.0	NC_000913.3_art_ISs	4233418.0	4233918.0		4235140.0	4235640.0	NC_000913.3	4122307.0				4123308.0	IS only present in query Strain.	1. DLIS	Complete IS hit.	-	Intergenic/Pseudo/Repeaed Region	-	Intergenic/Pseudo/Repeaed Region	-	Intergenic/Pseudo/Repeaed Region	b3933	cell division protein FtsN	4763752.0
1	1					893	sim9	4249426	948	sim9	82	IS30_IS30	4249426	4250646.0	NC_000913.3_art_ISs	4248925.0	4249425.0		4250647.0	4251147.0	NC_000913.3	4136593.0				4137594.0	IS only present in query Strain.	1. DLIS	Complete IS hit.	b3943	cystine exporter	-	Intergenic/Pseudo/Repeaed Region	b3943	cystine exporter	b3944	conserved protein YijF	4763752.0
1	1					894	sim9	4320529	949	sim9	83	IS30_IS30	4320529	4321749.0	NC_000913.3_art_ISs	4320028.0	4320528.0		4321750.0	4322250.0	NC_000913.3	4206475.0				4207476.0	IS only present in query Strain.	1. DLIS	Complete IS hit.	-	Intergenic/Pseudo/Repeaed Region	-	Intergenic/Pseudo/Repeaed Region	b4006	bifunctional AICAR transformylase/IMP cyclohydrolase	b4006	bifunctional AICAR transformylase/IMP cyclohydrolase	4763752.0
1	1					895	sim9	4424698	950	sim9	84	IS30_IS30	4424698	4425918.0	NC_000913.3_art_ISs	4424197.0	4424697.0		4425919.0	4426419.0	NC_000913.3	4309423.0				4310424.0	IS only present in query Strain.	1. DLIS	Complete IS hit.	b4086	D-allose ABC transporter membrane subunit	-	Intergenic/Pseudo/Repeaed Region	b4086	D-allose ABC transporter membrane subunit	b4087	D-allose ABC transporter ATP binding subunit	4763752.0
1	1					896	sim9	4447468	951	sim9	85	IS30_IS30	4447468	4448688.0	NC_000913.3_art_ISs	4446967.0	4447467.0		4448689.0	4449189.0	NC_000913.3	4330972.0				4331973.0	IS only present in query Strain.	1. DLIS	Complete IS hit.	-	Intergenic/Pseudo/Repeaed Region	-	Intergenic/Pseudo/Repeaed Region	b4111	osmolyte:H(+) symporter ProP	b4111	osmolyte:H(+) symporter ProP	4763752.0
1	1					897	sim9	4449671	952	sim9	86	IS30_IS30	4449671	4450891.0	NC_000913.3_art_ISs	4449170.0	4449670.0		4450892.0	4451392.0	NC_000913.3	4331954.0				4332955.0	IS only present in query Strain.	1. DLIS	Complete IS hit.	-	Intergenic/Pseudo/Repeaed Region	-	Intergenic/Pseudo/Repeaed Region	b4111	osmolyte:H(+) symporter ProP	b4112	sensory histidine kinase BasS	4763752.0
1	1					898	sim9	4483837	953	sim9	87	IS30_IS30	4483837	4485057.0	NC_000913.3_art_ISs	4483336.0	4483836.0		4485058.0	4485558.0	NC_000913.3	4364899.0				4365900.0	IS only present in query Strain.	1. DLIS	Complete IS hit.	b4136	protein disulfide oxidoreductase - DsbDreduced	b4138	C4-dicarboxylate transporter DcuA	b4136	protein disulfide oxidoreductase - DsbDreduced	b4138	C4-dicarboxylate transporter DcuA	4763752.0
1	1					899	sim9	4512686	954	sim9	88	IS30_IS30	4512686	4513906.0	NC_000913.3_art_ISs	4512185.0	4512685.0		4513907.0	4514407.0	NC_000913.3	4392527.0				4393528.0	IS only present in query Strain.	1. DLIS	Complete IS hit.	-	Intergenic/Pseudo/Repeaed Region	-	Intergenic/Pseudo/Repeaed Region	-	Intergenic/Pseudo/Repeaed Region	b4166	epoxyqueuosine reductase	4763752.0
1	1					900	sim9	4535433	955	sim9	89	IS30_IS30	4535433	4536653.0	NC_000913.3_art_ISs	4534932.0	4535432.0		4536654.0	4537154.0	NC_000913.3	4414053.0				4415054.0	IS only present in query Strain.	1. DLIS	Complete IS hit.	b4186	putative acid--amine ligase YjfC	-	Intergenic/Pseudo/Repeaed Region	b4186	putative acid--amine ligase YjfC	b4187	putative acyl-CoA dehydrogenase AidB	4763752.0
1	1					901	sim10	606	978	sim10	0	IS30_IS30	606	1826.0	NC_000913.3_art_ISs	105.0	605.0		1827.0	2327.0	NC_000913.3	105.0				1106.0	IS only present in query Strain.	1. DLIS	Complete IS hit.	-	Intergenic/Pseudo/Repeaed Region	-	Intergenic/Pseudo/Repeaed Region	-	Intergenic/Pseudo/Repeaed Region	b0002	fused aspartate kinase/homoserine dehydrogenase 1	4763752.0
1	1					902	sim10	10899	979	sim10	1	IS30_IS30	10899	12119.0	NC_000913.3_art_ISs	10398.0	10898.0		12120.0	12620.0	NC_000913.3	9177.0				10178.0	IS only present in query Strain.	1. DLIS	Complete IS hit.	b0008	transaldolase B	b0010	acetate/succinate:H(+) symporter	b0008	transaldolase B	b0010	acetate/succinate:H(+) symporter	4763752.0
1	1					903	sim10	24656	980	sim10	2	IS30_IS30	24656	25876.0	NC_000913.3_art_ISs	24155.0	24655.0		25877.0	26377.0	NC_000913.3	21713.0				22714.0	IS only present in query Strain.	1. DLIS	Complete IS hit.	-	Intergenic/Pseudo/Repeaed Region	b0026	isoleucine--tRNA ligase	b0025	bifunctional riboflavin kinase/FMN adenylyltransferase	b0026	isoleucine--tRNA ligase	4763752.0
1	1					904	sim10	31815	981	sim10	3	IS30_IS30	31815	33035.0	NC_000913.3_art_ISs	31314.0	31814.0		33036.0	33536.0	NC_000913.3	27651.0				28652.0	IS only present in query Strain.	1. DLIS	Complete IS hit.	-	Intergenic/Pseudo/Repeaed Region	b0031	4-hydroxy-tetrahydrodipicolinate reductase	b0030	ribonucleoside hydrolase RihC	b0031	4-hydroxy-tetrahydrodipicolinate reductase	4763752.0
1	1					905	sim10	201940	982	sim10	4	IS30_IS30	201940	203160.0	NC_000913.3_art_ISs	201439.0	201939.0		203161.0	203661.0	NC_000913.3	196555.0				197556.0	IS only present in query Strain.	1. DLIS	Complete IS hit.	-	Intergenic/Pseudo/Repeaed Region	-	Intergenic/Pseudo/Repeaed Region	b0176	intramembrane zinc metalloprotease	b0176	intramembrane zinc metalloprotease	4763752.0
1	1					906	sim10	251053	983	sim10	5	IS30_IS30	251053	252273.0	NC_000913.3_art_ISs	250552.0	251052.0		252274.0	252774.0	NC_000913.3	244447.0				245448.0	IS only present in query Strain.	1. DLIS	Complete IS hit.	-	Intergenic/Pseudo/Repeaed Region	b0224	L;D-transpeptidase domain-containing protein YafK	b0223	putative amidotransferase	b0224	L;D-transpeptidase domain-containing protein YafK	4763752.0
1	1					907	sim10	309030	984	sim10	6	IS30_IS30	309030	310250.0	NC_000913.3_art_ISs	308529.0	309029.0		310251.0	310751.0	NC_000913.3	301203.0				302204.0	IS only present in query Strain.	1. DLIS	Complete IS hit.	-	Intergenic/Pseudo/Repeaed Region	b0286	aldehyde dehydrogenase; Fe-S subunit	b0285	aldehyde dehydrogenase; FAD-binding subunit	b0286	aldehyde dehydrogenase; Fe-S subunit	4763752.0
1	1					908	sim10	509513	985	sim10	7	IS30_IS30	509513	510733.0	NC_000913.3_art_ISs	509012.0	509512.0		510734.0	511234.0	NC_000913.3	500465.0				501466.0	IS only present in query Strain.	1. DLIS	Complete IS hit.	-	Intergenic/Pseudo/Repeaed Region	-	Intergenic/Pseudo/Repeaed Region	b0477	inosine/guanosine kinase	-	Intergenic/Pseudo/Repeaed Region	4763752.0
1	1					909	sim10	557112	986	sim10	8	IS30_IS30	557112	558332.0	NC_000913.3_art_ISs	556611.0	557111.0		558333.0	558833.0	NC_000913.3	546843.0				547844.0	IS only present in query Strain.	1. DLIS	Complete IS hit.	-	Intergenic/Pseudo/Repeaed Region	-	Intergenic/Pseudo/Repeaed Region	b0518	putative acyl-CoA synthetase FdrA	b0518	putative acyl-CoA synthetase FdrA	4763752.0
1	1					910	sim10	592498	987	sim10	9	IS30_IS30	592498	593718.0	NC_000913.3_art_ISs	591997.0	592497.0		593719.0	594219.0	NC_000913.3	581008.0				582009.0	IS only present in query Strain.	1. DLIS	Complete IS hit.	b0560	DLP12 prophage; putative DNA-packaging protein NohD	b0561	DLP12 prophage; putative tail fiber assembly protein TfaD	b0560	DLP12 prophage; putative DNA-packaging protein NohD	b0561	DLP12 prophage; putative tail fiber assembly protein TfaD	4763752.0
1	1					911	sim10	637245	988	sim10	10	IS30_IS30	637245	638465.0	NC_000913.3_art_ISs	636744.0	637244.0		638466.0	638966.0	NC_000913.3	624534.0				625535.0	IS only present in query Strain.	1. DLIS	Complete IS hit.	-	Intergenic/Pseudo/Repeaed Region	-	Intergenic/Pseudo/Repeaed Region	-	Intergenic/Pseudo/Repeaed Region	b0593	isochorismate synthase EntC	4763752.0
1	1					912	sim10	771342	989	sim10	11	IS30_IS30	771342	772562.0	NC_000913.3_art_ISs	770841.0	771341.0		772563.0	773063.0	NC_000913.3	757410.0				758411.0	IS only present in query Strain.	1. DLIS	Complete IS hit.	b0723	succinate:quinone oxidoreductase; FAD binding protein	-	Intergenic/Pseudo/Repeaed Region	b0723	succinate:quinone oxidoreductase; FAD binding protein	-	Intergenic/Pseudo/Repeaed Region	4763752.0
1	1					913	sim10	800629	990	sim10	12	IS30_IS30	800629	801849.0	NC_000913.3_art_ISs	800128.0	800628.0		801850.0	802350.0	NC_000913.3	785476.0				786477.0	IS only present in query Strain.	1. DLIS	Complete IS hit.	-	Intergenic/Pseudo/Repeaed Region	-	Intergenic/Pseudo/Repeaed Region	-	Intergenic/Pseudo/Repeaed Region	b0754	3-deoxy-7-phosphoheptulonate synthase; Phe-sensitive	4763752.0
1	1					914	sim10	828778	991	sim10	13	IS30_IS30	828778	829998.0	NC_000913.3_art_ISs	828277.0	828777.0		829999.0	830499.0	NC_000913.3	812404.0				813405.0	IS only present in query Strain.	1. DLIS	Complete IS hit.	-	Intergenic/Pseudo/Repeaed Region	-	Intergenic/Pseudo/Repeaed Region	b0778	dethiobiotin synthetase	-	Intergenic/Pseudo/Repeaed Region	4763752.0
1	1					915	sim10	843989	992	sim10	14	IS30_IS30	843989	845209.0	NC_000913.3_art_ISs	843488.0	843988.0		845210.0	845710.0	NC_000913.3	826394.0				827395.0	IS only present in query Strain.	1. DLIS	Complete IS hit.	-	Intergenic/Pseudo/Repeaed Region	b0794	putative ABC exporter ATP binding subunit	b0793	putative ABC exporter membrane subunit YbhS	b0794	putative ABC exporter ATP binding subunit	4763752.0
1	1					916	sim10	916144	993	sim10	15	IS30_IS30	916144	917364.0	NC_000913.3_art_ISs	915643.0	916143.0		917365.0	917865.0	NC_000913.3	897328.0				898329.0	IS only present in query Strain.	1. DLIS	Complete IS hit.	-	Intergenic/Pseudo/Repeaed Region	b0858	putative inner membrane protein	b0857	putrescine ABC transporter membrane subunit PotI	b0858	putative inner membrane protein	4763752.0
1	1					917	sim10	1065368	994	sim10	16	IS30_IS30	1065368	1066588.0	NC_000913.3_art_ISs	1064867.0	1065367.0		1066589.0	1067089.0	NC_000913.3	1045331.0				1046332.0	IS only present in query Strain.	1. DLIS	Complete IS hit.	b0983	putative exopolysaccharide export lipoprotein GfcE	b0984	putative lipoprotein GfcD	b0983	putative exopolysaccharide export lipoprotein GfcE	b0984	putative lipoprotein GfcD	4763752.0
1	1					918	sim10	1194247	995	sim10	17	IS30_IS30	1194247	1195467.0	NC_000913.3_art_ISs	1193746.0	1194246.0		1195468.0	1195968.0	NC_000913.3	1172989.0				1173990.0	IS only present in query Strain.	1. DLIS	Complete IS hit.	-	Intergenic/Pseudo/Repeaed Region	-	Intergenic/Pseudo/Repeaed Region	b1114	transcription-repair coupling factor	-	Intergenic/Pseudo/Repeaed Region	4763752.0
1	1					919	sim10	1223127	996	sim10	18	IS30_IS30	1223127	1224347.0	NC_000913.3_art_ISs	1222626.0	1223126.0		1224348.0	1224848.0	NC_000913.3	1200648.0				1201649.0	IS only present in query Strain.	1. DLIS	Complete IS hit.	b1140	e14 prophage; putative integrase	b1143	e14 prophage; protein YmfI	b1140	e14 prophage; putative integrase	b1143	e14 prophage; protein YmfI	4763752.0
1	1					920	sim10	1260133	997	sim10	19	IS30_IS30	1260133	1261353.0	NC_000913.3_art_ISs	1259632.0	1260132.0		1261354.0	1261854.0	NC_000913.3	1236433.0				1237434.0	IS only present in query Strain.	1. DLIS	Complete IS hit.	-	Intergenic/Pseudo/Repeaed Region	-	Intergenic/Pseudo/Repeaed Region	b1188	PF04293 family protein YcgB	-	Intergenic/Pseudo/Repeaed Region	4763752.0
1	1					921	sim10	1262990	998	sim10	20	IS30_IS30	1262990	1264210.0	NC_000913.3_art_ISs	1262489.0	1262989.0		1264211.0	1264711.0	NC_000913.3	1238069.0				1239070.0	IS only present in query Strain.	1. DLIS	Complete IS hit.	-	Intergenic/Pseudo/Repeaed Region	b1190	alanine racemase 2	b1189	D-amino acid dehydrogenase	b1190	alanine racemase 2	4763752.0
1	1					922	sim10	1361495	999	sim10	21	IS30_IS30	1361495	1362715.0	NC_000913.3_art_ISs	1360994.0	1361494.0		1362716.0	1363216.0	NC_000913.3	1335353.0				1336354.0	IS only present in query Strain.	1. DLIS	Complete IS hit.	b4523	uncharacterized protein YciX	-	Intergenic/Pseudo/Repeaed Region	b4523	uncharacterized protein YciX	b1276	aconitate hydratase 1	4763752.0
1	1					923	sim10	1367631	1000	sim10	22	IS30_IS30	1367631	1368851.0	NC_000913.3_art_ISs	1367130.0	1367630.0		1368852.0	1369352.0	NC_000913.3	1340268.0				1341269.0	IS only present in query Strain.	1. DLIS	Complete IS hit.	b1279	lipopolysaccharide assembly protein A	-	Intergenic/Pseudo/Repeaed Region	b1279	lipopolysaccharide assembly protein A	b1280	lipopolysaccharide assembly protein B	4763752.0
1	1					924	sim10	1433494	1001	sim10	23	IS30_IS30	1433494	1434714.0	NC_000913.3_art_ISs	1432993.0	1433493.0		1434715.0	1435215.0	NC_000913.3	1404910.0				1405911.0	IS only present in query Strain.	1. DLIS	Complete IS hit.	-	Intergenic/Pseudo/Repeaed Region	-	Intergenic/Pseudo/Repeaed Region	b1339	putative LysR-type DNA-binding transcriptional regulator AbgR	-	Intergenic/Pseudo/Repeaed Region	4763752.0
1	1					925	sim10	1565522	1002	sim10	24	IS30_IS30	1565522	1566742.0	NC_000913.3_art_ISs	1565021.0	1565521.0		1566743.0	1567243.0	NC_000913.3	1535717.0				1536718.0	IS only present in query Strain.	1. DLIS	Complete IS hit.	b1464	PF02567 family protein YddE	b1466	NarW; putative private chaperone for NarZ nitrate reductase subunit	b1464	PF02567 family protein YddE	b1466	NarW; putative private chaperone for NarZ nitrate reductase subunit	4763752.0
1	1					926	sim10	1571088	1003	sim10	25	IS30_IS30	1571088	1572308.0	NC_000913.3_art_ISs	1570587.0	1571087.0		1572309.0	1572809.0	NC_000913.3	1540062.0				1541063.0	IS only present in query Strain.	1. DLIS	Complete IS hit.	-	Intergenic/Pseudo/Repeaed Region	-	Intergenic/Pseudo/Repeaed Region	b1468	nitrate reductase Z subunit alpha	b1468	nitrate reductase Z subunit alpha	4763752.0
1	1					927	sim10	1579999	1004	sim10	26	IS30_IS30	1579999	1581219.0	NC_000913.3_art_ISs	1579498.0	1579998.0		1581220.0	1581720.0	NC_000913.3	1547752.0				1548753.0	IS only present in query Strain.	1. DLIS	Complete IS hit.	-	Intergenic/Pseudo/Repeaed Region	-	Intergenic/Pseudo/Repeaed Region	b1474	formate dehydrogenase N subunit alpha	b1474	formate dehydrogenase N subunit alpha	4763752.0
1	1					928	sim10	1613064	1005	sim10	27	IS30_IS30	1613064	1614284.0	NC_000913.3_art_ISs	1612563.0	1613063.0		1614285.0	1614785.0	NC_000913.3	1579596.0				1580597.0	IS only present in query Strain.	1. DLIS	Complete IS hit.	b4747	protein YneP	-	Intergenic/Pseudo/Repeaed Region	b4747	protein YneP	b1497	putative anaerobic sulfatase maturation enzyme YdeM	4763752.0
1	1					929	sim10	1621533	1006	sim10	28	IS30_IS30	1621533	1622753.0	NC_000913.3_art_ISs	1621032.0	1621532.0		1622754.0	1623254.0	NC_000913.3	1586844.0				1587845.0	IS only present in query Strain.	1. DLIS	Complete IS hit.	-	Intergenic/Pseudo/Repeaed Region	b1503	putative fimbrial protein YdeR	b1502	putative fimbrial adhesin protein YdeQ	b1503	putative fimbrial protein YdeR	4763752.0
1	1					930	sim10	1650571	1007	sim10	29	IS30_IS30	1650571	1651791.0	NC_000913.3_art_ISs	1650070.0	1650570.0		1651792.0	1652292.0	NC_000913.3	1614661.0				1615662.0	IS only present in query Strain.	1. DLIS	Complete IS hit.	b1525	NAD(+)-dependent succinate semialdehyde dehydrogenase	-	Intergenic/Pseudo/Repeaed Region	b1525	NAD(+)-dependent succinate semialdehyde dehydrogenase	b1526	putative LysR-type DNA-binding transcriptional regulator YneJ	4763752.0
1	1					931	sim10	1687890	1008	sim10	30	IS30_IS30	1687890	1689110.0	NC_000913.3_art_ISs	1687389.0	1687889.0		1689111.0	1689611.0	NC_000913.3	1650759.0				1651760.0	IS only present in query Strain.	1. DLIS	Complete IS hit.	b1577	Qin prophage; protein YdfE	b1579	Qin prophage; putative defective integrase	b1577	Qin prophage; protein YdfE	b1579	Qin prophage; putative defective integrase	4763752.0
1	1					932	sim10	1718090	1009	sim10	31	IS30_IS30	1718090	1719310.0	NC_000913.3_art_ISs	1717589.0	1718089.0		1719311.0	1719811.0	NC_000913.3	1679738.0				1680739.0	IS only present in query Strain.	1. DLIS	Complete IS hit.	-	Intergenic/Pseudo/Repeaed Region	-	Intergenic/Pseudo/Repeaed Region	b1605	putative arginine:ornithine antiporter	b1605	putative arginine:ornithine antiporter	4763752.0
1	1					933	sim10	1726379	1010	sim10	32	IS30_IS30	1726379	1727599.0	NC_000913.3_art_ISs	1725878.0	1726378.0		1727600.0	1728100.0	NC_000913.3	1686806.0				1687807.0	IS only present in query Strain.	1. DLIS	Complete IS hit.	-	Intergenic/Pseudo/Repeaed Region	-	Intergenic/Pseudo/Repeaed Region	b1612	fumarase A	b1612	fumarase A	4763752.0
1	1					934	sim10	1838465	1011	sim10	33	IS30_IS30	1838465	1839685.0	NC_000913.3_art_ISs	1837964.0	1838464.0		1839686.0	1840186.0	NC_000913.3	1797671.0				1798672.0	IS only present in query Strain.	1. DLIS	Complete IS hit.	b1713	phenylalanine--tRNA ligase subunit beta	-	Intergenic/Pseudo/Repeaed Region	b1713	phenylalanine--tRNA ligase subunit beta	b1714	phenylalanine--tRNA ligase subunit alpha	4763752.0
1	1					935	sim10	1858811	1012	sim10	34	IS30_IS30	1858811	1860031.0	NC_000913.3_art_ISs	1858310.0	1858810.0		1860032.0	1860532.0	NC_000913.3	1816796.0				1817797.0	IS only present in query Strain.	1. DLIS	Complete IS hit.	b1733	chitin disaccharide deacetylase	-	Intergenic/Pseudo/Repeaed Region	b1733	chitin disaccharide deacetylase	b1734	monoacetylchitobiose-6-phosphate hydrolase	4763752.0
1	1					936	sim10	1899065	1013	sim10	35	IS30_IS30	1899065	1900285.0	NC_000913.3_art_ISs	1898564.0	1899064.0		1900286.0	1900786.0	NC_000913.3	1855829.0				1856830.0	IS only present in query Strain.	1. DLIS	Complete IS hit.	b1771	NADH-dependent methylglyoxal reductase	-	Intergenic/Pseudo/Repeaed Region	b1771	NADH-dependent methylglyoxal reductase	b1772	putative sugar kinase YdjH	4763752.0
1	1					937	sim10	1907493	1014	sim10	36	IS30_IS30	1907493	1908713.0	NC_000913.3_art_ISs	1906992.0	1907492.0		1908714.0	1909214.0	NC_000913.3	1863036.0				1864037.0	IS only present in query Strain.	1. DLIS	Complete IS hit.	-	Intergenic/Pseudo/Repeaed Region	b1780	putative aldose 1-epimerase YeaD	b1779	glyceraldehyde-3-phosphate dehydrogenase A	b1780	putative aldose 1-epimerase YeaD	4763752.0
1	1					938	sim10	1924412	1015	sim10	37	IS30_IS30	1924412	1925632.0	NC_000913.3_art_ISs	1923911.0	1924411.0		1925633.0	1926133.0	NC_000913.3	1878734.0				1879735.0	IS only present in query Strain.	1. DLIS	Complete IS hit.	b1794	diguanylate cyclase DgcP	b1797	DUF1971 domain-containing protein YeaR	b1794	diguanylate cyclase DgcP	b1797	DUF1971 domain-containing protein YeaR	4763752.0
1	1					939	sim10	1942736	1016	sim10	38	IS30_IS30	1942736	1943956.0	NC_000913.3_art_ISs	1942235.0	1942735.0		1943957.0	1944457.0	NC_000913.3	1895837.0				1896838.0	IS only present in query Strain.	1. DLIS	Complete IS hit.	b1812	aminodeoxychorismate synthase subunit 1	-	Intergenic/Pseudo/Repeaed Region	b1812	aminodeoxychorismate synthase subunit 1	-	Intergenic/Pseudo/Repeaed Region	4763752.0
1	1					940	sim10	1964417	1017	sim10	39	IS30_IS30	1964417	1965637.0	NC_000913.3_art_ISs	1963916.0	1964416.0		1965638.0	1966138.0	NC_000913.3	1916297.0				1917298.0	IS only present in query Strain.	1. DLIS	Complete IS hit.	-	Intergenic/Pseudo/Repeaed Region	-	Intergenic/Pseudo/Repeaed Region	b1833	intermembrane transport protein YebS	b1833	intermembrane transport protein YebS	4763752.0
1	1					941	sim10	2029585	1018	sim10	40	IS30_IS30	2029585	2030805.0	NC_000913.3_art_ISs	2029084.0	2029584.0		2030806.0	2031306.0	NC_000913.3	1980244.0				1981245.0	IS only present in query Strain.	1. DLIS	Complete IS hit.	-	Intergenic/Pseudo/Repeaed Region	-	Intergenic/Pseudo/Repeaed Region	b1896	trehalose-6-phosphate synthase	b1896	trehalose-6-phosphate synthase	4763752.0
1	1					942	sim10	2059239	1019	sim10	41	IS30_IS30	2059239	2060459.0	NC_000913.3_art_ISs	2058738.0	2059238.0		2060460.0	2060960.0	NC_000913.3	2008677.0				2009678.0	IS only present in query Strain.	1. DLIS	Complete IS hit.	-	Intergenic/Pseudo/Repeaed Region	b1930	putative sulfurtransferase YedF	b1929	putative selenium transporter YedE	b1930	putative sulfurtransferase YedF	4763752.0
1	1					943	sim10	2089233	1020	sim10	42	IS30_IS30	2089233	2090453.0	NC_000913.3_art_ISs	2088732.0	2089232.0		2090454.0	2090954.0	NC_000913.3	2037450.0				2038451.0	IS only present in query Strain.	1. DLIS	Complete IS hit.	-	Intergenic/Pseudo/Repeaed Region	b1969	DNA-binding transcriptional dual regulator HprR	b1968	sensory histidine kinase HprS	b1969	DNA-binding transcriptional dual regulator HprR	4763752.0
1	1					944	sim10	2116351	1021	sim10	43	IS30_IS30	2116351	2117571.0	NC_000913.3_art_ISs	2115850.0	2116350.0		2117572.0	2118072.0	NC_000913.3	2063347.0				2064348.0	IS only present in query Strain.	1. DLIS	Complete IS hit.	-	Intergenic/Pseudo/Repeaed Region	-	Intergenic/Pseudo/Repeaed Region	-	Intergenic/Pseudo/Repeaed Region	b1991	nicotinate-nucleotide--dimethylbenzimidazole phosphoribosyltransferase	4763752.0
1	1					945	sim10	2164269	1022	sim10	44	IS30_IS30	2164269	2165489.0	NC_000913.3_art_ISs	2163768.0	2164268.0		2165490.0	2165990.0	NC_000913.3	2110044.0				2111045.0	IS only present in query Strain.	1. DLIS	Complete IS hit.	b2038	dTDP-4-dehydrorhamnose 3;5-epimerase	-	Intergenic/Pseudo/Repeaed Region	b2038	dTDP-4-dehydrorhamnose 3;5-epimerase	-	Intergenic/Pseudo/Repeaed Region	4763752.0
1	1					946	sim10	2220232	1023	sim10	45	IS30_IS30	2220232	2221452.0	NC_000913.3_art_ISs	2219731.0	2220231.0		2221453.0	2221953.0	NC_000913.3	2164786.0				2165787.0	IS only present in query Strain.	1. DLIS	Complete IS hit.	b2079	DNA-binding transcriptional activator BaeR	b2081	putative peptidase YegQ	b2079	DNA-binding transcriptional activator BaeR	b2081	putative peptidase YegQ	4763752.0
1	1					947	sim10	2225162	1024	sim10	46	IS30_IS30	2225162	2226382.0	NC_000913.3_art_ISs	2224661.0	2225161.0		2226383.0	2226883.0	NC_000913.3	2168495.0				2169496.0	IS only present in query Strain.	1. DLIS	Complete IS hit.	-	Intergenic/Pseudo/Repeaed Region	-	Intergenic/Pseudo/Repeaed Region	-	Intergenic/Pseudo/Repeaed Region	b2086	lipid kinase	4763752.0
1	1					948	sim10	2279447	1025	sim10	47	IS30_IS30	2279447	2280667.0	NC_000913.3_art_ISs	2278946.0	2279446.0		2280668.0	2281168.0	NC_000913.3	2221559.0				2222560.0	IS only present in query Strain.	1. DLIS	Complete IS hit.	b2132	beta-D-glucoside glucohydrolase; periplasmic	b2133	D-lactate dehydrogenase	b2132	beta-D-glucoside glucohydrolase; periplasmic	b2133	D-lactate dehydrogenase	4763752.0
1	1					949	sim10	2336295	1026	sim10	48	IS30_IS30	2336295	2337515.0	NC_000913.3_art_ISs	2335794.0	2336294.0		2337516.0	2338016.0	NC_000913.3	2277186.0				2278187.0	IS only present in query Strain.	1. DLIS	Complete IS hit.	-	Intergenic/Pseudo/Repeaed Region	b2181	protein YejG	b2180	putative oligopeptide ABC transporter ATP binding subunit	b2181	protein YejG	4763752.0
1	1					950	sim10	2403789	1027	sim10	49	IS30_IS30	2403789	2405009.0	NC_000913.3_art_ISs	2403288.0	2403788.0		2405010.0	2405510.0	NC_000913.3	2343459.0				2344460.0	IS only present in query Strain.	1. DLIS	Complete IS hit.	-	Intergenic/Pseudo/Repeaed Region	-	Intergenic/Pseudo/Repeaed Region	b2233	putative autotransporter adhesin YfaL	-	Intergenic/Pseudo/Repeaed Region	4763752.0
1	1					951	sim10	2407784	1028	sim10	50	IS30_IS30	2407784	2409004.0	NC_000913.3_art_ISs	2407283.0	2407783.0		2409005.0	2409505.0	NC_000913.3	2346233.0				2347234.0	IS only present in query Strain.	1. DLIS	Complete IS hit.	-	Intergenic/Pseudo/Repeaed Region	-	Intergenic/Pseudo/Repeaed Region	b2234	ribonucleoside-diphosphate reductase 1 subunit alpha	-	Intergenic/Pseudo/Repeaed Region	4763752.0
1	1					952	sim10	2449885	1029	sim10	51	IS30_IS30	2449885	2451105.0	NC_000913.3_art_ISs	2449384.0	2449884.0		2451106.0	2451606.0	NC_000913.3	2387113.0				2388114.0	IS only present in query Strain.	1. DLIS	Complete IS hit.	b2272	DUF1877 domain-containing protein YfbM	b2273	uncharacterized protein YfbN	b2272	DUF1877 domain-containing protein YfbM	b2273	uncharacterized protein YfbN	4763752.0
1	1					953	sim10	2474280	1030	sim10	52	IS30_IS30	2474280	2475500.0	NC_000913.3_art_ISs	2473779.0	2474279.0		2475501.0	2476001.0	NC_000913.3	2410287.0				2411288.0	IS only present in query Strain.	1. DLIS	Complete IS hit.	-	Intergenic/Pseudo/Repeaed Region	-	Intergenic/Pseudo/Repeaed Region	b2292	putative transporter YfbS	b2292	putative transporter YfbS	4763752.0
1	1					954	sim10	2517121	1031	sim10	53	IS30_IS30	2517121	2518341.0	NC_000913.3_art_ISs	2516620.0	2517120.0		2518342.0	2518842.0	NC_000913.3	2451907.0				2452908.0	IS only present in query Strain.	1. DLIS	Complete IS hit.	b2336	putative fimbrial chaperone YfcS	-	Intergenic/Pseudo/Repeaed Region	b2336	putative fimbrial chaperone YfcS	b4661	putative outer membrane usher protein YfcU	4763752.0
1	1					955	sim10	2521813	1032	sim10	54	IS30_IS30	2521813	2523033.0	NC_000913.3_art_ISs	2521312.0	2521812.0		2523034.0	2523534.0	NC_000913.3	2455378.0				2456379.0	IS only present in query Strain.	1. DLIS	Complete IS hit.	b2339	putative fimbrial protein YfcV	b2340	phosphohistidine phosphatase	b2339	putative fimbrial protein YfcV	b2340	phosphohistidine phosphatase	4763752.0
1	1					956	sim10	2553453	1033	sim10	55	IS30_IS30	2553453	2554673.0	NC_000913.3_art_ISs	2552952.0	2553452.0		2554674.0	2555174.0	NC_000913.3	2485797.0				2486798.0	IS only present in query Strain.	1. DLIS	Complete IS hit.	-	Intergenic/Pseudo/Repeaed Region	-	Intergenic/Pseudo/Repeaed Region	b2370	sensory histidine kinase EvgS	b2370	sensory histidine kinase EvgS	4763752.0
1	1					957	sim10	2652541	1034	sim10	56	IS30_IS30	2652541	2653761.0	NC_000913.3_art_ISs	2652040.0	2652540.0		2653762.0	2654262.0	NC_000913.3	2583664.0				2584665.0	IS only present in query Strain.	1. DLIS	Complete IS hit.	-	Intergenic/Pseudo/Repeaed Region	-	Intergenic/Pseudo/Repeaed Region	b2468	putative oxidoreductase Fe-S subunit AegA	b2468	putative oxidoreductase Fe-S subunit AegA	4763752.0
1	1					958	sim10	2688809	1035	sim10	57	IS30_IS30	2688809	2690029.0	NC_000913.3_art_ISs	2688308.0	2688808.0		2690030.0	2690530.0	NC_000913.3	2618711.0				2619712.0	IS only present in query Strain.	1. DLIS	Complete IS hit.	b2496	inibitor of reinitiation of DNA replication	-	Intergenic/Pseudo/Repeaed Region	b2496	inibitor of reinitiation of DNA replication	b2497	hypothetical protein	4763752.0
1	1					961	sim10	2767076	1036	sim10	58	IS30_IS30	2767076	2768296.0	NC_000913.3_art_ISs	2766575.0	2767075.0		2768297.0	2768797.0	NC_000913.3	2693315.0				2694316.0	IS only present in query Strain.	1. DLIS	Complete IS hit.	-	Intergenic/Pseudo/Repeaed Region	-	Intergenic/Pseudo/Repeaed Region	b2557	phosphoribosylformylglycinamide synthetase	b2557	phosphoribosylformylglycinamide synthetase	4763752.0
1	1					962	sim10	3003465	1037	sim10	59	IS30_IS30	3003465	3004685.0	NC_000913.3_art_ISs	3002964.0	3003464.0		3004686.0	3005186.0	NC_000913.3	2928483.0				2929484.0	IS only present in query Strain.	1. DLIS	Complete IS hit.	-	Intergenic/Pseudo/Repeaed Region	-	Intergenic/Pseudo/Repeaed Region	b2796	serine:H(+) symporter SdaC	b2796	serine:H(+) symporter SdaC	4763752.0
1	1					963	sim10	3110612	1038	sim10	60	IS30_IS30	3110612	3111832.0	NC_000913.3_art_ISs	3110111.0	3110611.0		3111833.0	3112333.0	NC_000913.3	3034409.0				3035410.0	IS only present in query Strain.	1. DLIS	Complete IS hit.	-	Intergenic/Pseudo/Repeaed Region	b2891	peptide chain release factor RF2	b2890	lysine--tRNA ligase; constitutive	b2891	peptide chain release factor RF2	4763752.0
1	1					964	sim10	3239566	1039	sim10	61	IS30_IS30	3239566	3240786.0	NC_000913.3_art_ISs	3239065.0	3239565.0		3240787.0	3241287.0	NC_000913.3	3162142.0				3163143.0	IS only present in query Strain.	1. DLIS	Complete IS hit.	-	Intergenic/Pseudo/Repeaed Region	b3018	1-acylglycerol-3-phosphate O-acyltransferase	b3017	cell division protein required during stress conditions	b3018	1-acylglycerol-3-phosphate O-acyltransferase	4763752.0
1	1					965	sim10	3269244	1040	sim10	62	IS30_IS30	3269244	3270464.0	NC_000913.3_art_ISs	3268743.0	3269243.0		3270465.0	3270965.0	NC_000913.3	3190599.0				3191600.0	IS only present in query Strain.	1. DLIS	Complete IS hit.	b3047	putative fimbrial chaperone YqiH	-	Intergenic/Pseudo/Repeaed Region	b3047	putative fimbrial chaperone YqiH	b3048	putative fimbrial protein YqiI	4763752.0
1	1					966	sim10	3341029	1041	sim10	63	IS30_IS30	3341029	3342249.0	NC_000913.3_art_ISs	3340528.0	3341028.0		3342250.0	3342750.0	NC_000913.3	3261163.0				3262164.0	IS only present in query Strain.	1. DLIS	Complete IS hit.	-	Intergenic/Pseudo/Repeaed Region	-	Intergenic/Pseudo/Repeaed Region	b3114	2-ketobutyrate formate-lyase/pyruvate formate-lyase 4	b3114	2-ketobutyrate formate-lyase/pyruvate formate-lyase 4	4763752.0
1	1					967	sim10	3348610	1042	sim10	64	IS30_IS30	3348610	3349830.0	NC_000913.3_art_ISs	3348109.0	3348609.0		3349831.0	3350331.0	NC_000913.3	3267523.0				3268524.0	IS only present in query Strain.	1. DLIS	Complete IS hit.	b3119	DNA-binding transcriptional activator TdcR	b3121	uncharacterized protein YhaC	b3119	DNA-binding transcriptional activator TdcR	b3121	uncharacterized protein YhaC	4763752.0
1	1					968	sim10	3384273	1043	sim10	65	IS30_IS30	3384273	3385493.0	NC_000913.3_art_ISs	3383772.0	3384272.0		3385494.0	3385994.0	NC_000913.3	3301965.0				3302966.0	IS only present in query Strain.	1. DLIS	Complete IS hit.	-	Intergenic/Pseudo/Repeaed Region	b3159	putative peptidase YhbV	b3158	putative peptidase YhbU	b3159	putative peptidase YhbV	4763752.0
1	1					969	sim10	3436400	1044	sim10	66	IS30_IS30	3436400	3437620.0	NC_000913.3_art_ISs	3435899.0	3436399.0		3437621.0	3438121.0	NC_000913.3	3352871.0				3353872.0	IS only present in query Strain.	1. DLIS	Complete IS hit.	b3210	sensory histidine kinase ArcB	-	Intergenic/Pseudo/Repeaed Region	b3210	sensory histidine kinase ArcB	b3211	radical SAM family oxidoreductase YhcC	4763752.0
1	1					970	sim10	3548957	1045	sim10	67	IS30_IS30	3548957	3550177.0	NC_000913.3_art_ISs	3548456.0	3548956.0		3550178.0	3550678.0	NC_000913.3	3464207.0				3465208.0	IS only present in query Strain.	1. DLIS	Complete IS hit.	-	Intergenic/Pseudo/Repeaed Region	b3334	Type II secretion system protein GspM	b3333	Type II secretion system protein GspL	b3334	Type II secretion system protein GspM	4763752.0
1	1					971	sim10	3573612	1046	sim10	68	IS30_IS30	3573612	3574832.0	NC_000913.3_art_ISs	3573111.0	3573611.0		3574833.0	3575333.0	NC_000913.3	3487641.0				3488642.0	IS only present in query Strain.	1. DLIS	Complete IS hit.	-	Intergenic/Pseudo/Repeaed Region	-	Intergenic/Pseudo/Repeaed Region	b3358	putative transporter YhfK	b3358	putative transporter YhfK	4763752.0
1	1					972	sim10	3581749	1047	sim10	69	IS30_IS30	3581749	3582969.0	NC_000913.3_art_ISs	3581248.0	3581748.0		3582970.0	3583470.0	NC_000913.3	3494557.0				3495558.0	IS only present in query Strain.	1. DLIS	Complete IS hit.	-	Intergenic/Pseudo/Repeaed Region	-	Intergenic/Pseudo/Repeaed Region	b3365	nitrite reductase catalytic subunit NirB	b3365	nitrite reductase catalytic subunit NirB	4763752.0
1	1					973	sim10	3846250	1048	sim10	70	IS30_IS30	3846250	3847470.0	NC_000913.3_art_ISs	3845749.0	3846249.0		3847471.0	3847971.0	NC_000913.3	3757837.0				3758838.0	IS only present in query Strain.	1. DLIS	Complete IS hit.	-	Intergenic/Pseudo/Repeaed Region	-	Intergenic/Pseudo/Repeaed Region	-	Intergenic/Pseudo/Repeaed Region	b3590	selenocysteyl-tRNA-specific translation elongation factor	4763752.0
1	1					974	sim10	3910474	1049	sim10	71	IS30_IS30	3910474	3911694.0	NC_000913.3_art_ISs	3909973.0	3910473.0		3911695.0	3912195.0	NC_000913.3	3820840.0				3821841.0	IS only present in query Strain.	1. DLIS	Complete IS hit.	b3647	DNA ligase B	b3648	guanylate kinase	b3647	DNA ligase B	b3648	guanylate kinase	4763752.0
1	1					975	sim10	3913276	1050	sim10	72	IS30_IS30	3913276	3914496.0	NC_000913.3_art_ISs	3912775.0	3913275.0		3914497.0	3914997.0	NC_000913.3	3822421.0				3823422.0	IS only present in query Strain.	1. DLIS	Complete IS hit.	-	Intergenic/Pseudo/Repeaed Region	-	Intergenic/Pseudo/Repeaed Region	b3650	bifunctional (p)ppGpp synthase/hydrolase SpoT	b3650	bifunctional (p)ppGpp synthase/hydrolase SpoT	4763752.0
1	1					976	sim10	3924503	1051	sim10	73	IS30_IS30	3924503	3925723.0	NC_000913.3_art_ISs	3924002.0	3924502.0		3925724.0	3926224.0	NC_000913.3	3832427.0				3833428.0	IS only present in query Strain.	1. DLIS	Complete IS hit.	-	Intergenic/Pseudo/Repeaed Region	-	Intergenic/Pseudo/Repeaed Region	b3656	alpha-D-xyloside xylohydrolase	b3656	alpha-D-xyloside xylohydrolase	4763752.0
1	1					977	sim10	3941877	1052	sim10	74	IS30_IS30	3941877	3943097.0	NC_000913.3_art_ISs	3941376.0	3941876.0		3943098.0	3943598.0	NC_000913.3	3848580.0				3849581.0	IS only present in query Strain.	1. DLIS	Complete IS hit.	b3667	inner membrane protein sensing glucose-6-phosphate	-	Intergenic/Pseudo/Repeaed Region	b3667	inner membrane protein sensing glucose-6-phosphate	b3668	sensory histidine kinase UhpB	4763752.0
1	1					978	sim10	3974727	1053	sim10	75	IS30_IS30	3974727	3975947.0	NC_000913.3_art_ISs	3974226.0	3974726.0		3975948.0	3976448.0	NC_000913.3	3880209.0				3881210.0	IS only present in query Strain.	1. DLIS	Complete IS hit.	-	Intergenic/Pseudo/Repeaed Region	-	Intergenic/Pseudo/Repeaed Region	b3700	DNA repair protein RecF	b3700	DNA repair protein RecF	4763752.0
1	1					979	sim10	3985512	1054	sim10	76	IS30_IS30	3985512	3986732.0	NC_000913.3_art_ISs	3985011.0	3985511.0		3986733.0	3987233.0	NC_000913.3	3889773.0				3890774.0	IS only present in query Strain.	1. DLIS	Complete IS hit.	b3708	tryptophanase	-	Intergenic/Pseudo/Repeaed Region	b3708	tryptophanase	b3709	tryptophan:H(+) symporter TnaB	4763752.0
1	1					980	sim10	3990286	1055	sim10	77	IS30_IS30	3990286	3991506.0	NC_000913.3_art_ISs	3989785.0	3990285.0		3991507.0	3992007.0	NC_000913.3	3893326.0				3894327.0	IS only present in query Strain.	1. DLIS	Complete IS hit.	b3711	putative LysR-type transcriptional regulator YidZ	b3712	putative phosphopantetheinyl transferase	b3711	putative LysR-type transcriptional regulator YidZ	b3712	putative phosphopantetheinyl transferase	4763752.0
1	1					981	sim10	4053225	1056	sim10	78	IS30_IS30	4053225	4054445.0	NC_000913.3_art_ISs	4052724.0	4053224.0		4054446.0	4054946.0	NC_000913.3	3955044.0				3956045.0	IS only present in query Strain.	1. DLIS	Complete IS hit.	b3771	dihydroxy-acid dehydratase	-	Intergenic/Pseudo/Repeaed Region	b3771	dihydroxy-acid dehydratase	b3772	threonine deaminase	4763752.0
1	1					984	sim10	4164642	1057	sim10	79	IS30_IS30	4164642	4165862.0	NC_000913.3_art_ISs	4164141.0	4164641.0		4165863.0	4166363.0	NC_000913.3	4062798.0				4063799.0	IS only present in query Strain.	1. DLIS	Complete IS hit.	-	Intergenic/Pseudo/Repeaed Region	b3875	putative outer membrane porin L	b3874	putative transporter YihN	b3875	putative outer membrane porin L	4763752.0
1	1					987	sim10	4221456	1058	sim10	80	IS30_IS30	4221456	4222676.0	NC_000913.3_art_ISs	4220955.0	4221455.0		4222677.0	4223177.0	NC_000913.3	4115949.0				4116950.0	IS only present in query Strain.	1. DLIS	Complete IS hit.	-	Intergenic/Pseudo/Repeaed Region	-	Intergenic/Pseudo/Repeaed Region	b3926	glycerol kinase	b3926	glycerol kinase	4763752.0
1	1					988	sim10	4232559	1059	sim10	81	IS30_IS30	4232559	4233779.0	NC_000913.3_art_ISs	4232058.0	4232558.0		4233780.0	4234280.0	NC_000913.3	4125831.0				4126832.0	IS only present in query Strain.	1. DLIS	Complete IS hit.	-	Intergenic/Pseudo/Repeaed Region	-	Intergenic/Pseudo/Repeaed Region	b3935	primosome factor N'	-	Intergenic/Pseudo/Repeaed Region	4763752.0
[truncated: 2,309 more rows]

## Sheet: Simulated IS insertions set 2
ID	Sim_I	location
1	sim1	62086
2	sim1	98710
3	sim1	138706
4	sim1	148902
5	sim1	163636
6	sim1	171855
7	sim1	240961
8	sim1	259810
9	sim1	309329
10	sim1	339928
11	sim1	391360
12	sim1	397342
13	sim1	407536
[truncated: 2,987 more rows]

## Sheet: ISCompare results for IS30
TP	TP*	FP	FP*	FN	FN*	ID	Sim_I	Location₁	ID1	sim_i	ISCompare.ID	ISID	ISstart	ISend	Query.ID1	Start1	End1	Query.ID2	Start2	End2	REF.ID1	REF.Start1	REF.End1	REF.ID2	REF.Start2	REF.End2	Description	Observations	IS_Match_Type	QUERY_Flank1.locus_tag	QUERY_Flank1.Product	QUERY_Flank2.locus_tag	QUERY_Flank2.Product	REF_Flank1.locus_tag	REF.Product_Flank1	REF_Flank2.locus_tag	REF.Product_Flank2	Scaffold_Size
[truncated: 3,055 more rows]
